# Supplementary material for: Synergistic enhancement of Sorghum bicolor nutrient uptake and growth by EBPR microbiomes and AM fungi
Source: Research Square preprint supplement (doi:10.21203/rs.3.rs-7066996/v1), 2025-08-22
Supplement: Supplementary file 1 [file bda26509638854fea9ba9d7f.xlsx]

## Sheet: Supplementary Table 1
Supplementary Table 1. List of significant microbial taxa identified at the most specific level that exhibited differential abundance across soil treatments. For each microbiome feature, P values were computed for pairwise comparisons of microbiome structures. Taxon abundance was transformed into the centered log-ratio (CLR) using Monte Carlo realizations of the Dirichlet distribution for each sa…
Comparison	Phylum	The most specific taxonomic classification	The median effect size	The median difference in CLR values between group	The BH adjusted P value of Wilcoxon test
AMF > Control	Bacteroidota	Genus:Dyadobacter	0.743399	1.80737	0.0331133
AMF > Control	Actinobacteriota	Genus:Nocardioides	2.01274	2.68573	0.000237623
AMF > Control	Actinobacteriota	Genus:Streptomyces	0.969938	2.25331	0.0143225
AMF > Control	Proteobacteria	Family:Xanthomonadaceae	1.063	0.999435	0.011624
AMF > Control	Bacteroidota	Genus:Niastella	0.993401	1.50538	0.0144803
AMF > Control	Firmicutes	Genus:Bacillus	1.10649	1.75998	0.0142264
AMF > Control	Actinobacteriota	Family:Streptomycetaceae	1.21003	2.77837	0.00553736
AMF > Control	Proteobacteria	Genus:Sphingomonas	1.76795	2.12049	0.0007921
AMF > Control	Proteobacteria	Family:Labraceae	1.36841	1.27749	0.00287118
AMF > Control	Proteobacteria	Genus:Massilia	1.64099	2.93431	0.000990122
AMF > Control	Firmicutes	Genus:Neobacillus	1.08932	2.05432	0.0120476
AMF > Control	Proteobacteria	Genus:Frateuria	1.29643	1.82101	0.00385504
AMF > Control	Bacteroidota	Genus:JC017	3.25809	9.17359	0.000160042
AMF > Control	Firmicutes	Genus:Pullulanibacillus	1.21177	2.32931	0.007022
AMF > Control	Proteobacteria	Genus:Pandoraea	2.75593	9.64417	0.00127237
AMF > Control	Proteobacteria	Family:Enterobacteriaceae	1.49388	3.33918	0.000642695
AMF > Control	Kingdom:Bacteria	Kingdom:Bacteria	1.52915	2.02645	0.000234542
AMF > Control	Proteobacteria	Genus:Novosphingobium	1.3165	1.05306	0.00569046
AMF > Control	Proteobacteria	Genus:Pusillimonas	1.74315	8.41717	0.00436735
AMF > Control	Planctomycetota	Genus:Urbifossiella	1.04845	2.40752	0.00484092
AMF > Control	Proteobacteria	Class:Alphaproteobacteria	0.820949	1.55989	0.00503106
AMF > Control	Actinobacteriota	Genus:Spirillospora	3.47737	10.8538	0.000160042
AMF > Control	Proteobacteria	Genus:Ramlibacter	1.65776	1.47222	0.000746598
AMF > Control	Proteobacteria	Genus:Legionella	1.71727	7.27068	0.00411419
AMF > Control	Proteobacteria	Genus:Paraburkholderia	1.55425	3.2127	0.000327166
AMF > Control	Proteobacteria	Family:Burkholderiaceae	0.885693	1.50267	0.0251028
AMF > Control	Firmicutes	Genus:Cohnella	1.73523	8.29426	0.00403651
AMF > Control	Proteobacteria	Genus:Rhodanobacter	1.4329	1.45113	0.0020351
AMF > Control	Bacteroidota	Genus:Pelobium	1.3442	6.62655	0.0137371
AMF > Control	Proteobacteria	Genus:Acinetobacter	1.77678	8.57908	0.00310835
AMF > Control	Proteobacteria	Genus:Nevskia	3.29223	9.07164	0.000160042
AMF > Control	Proteobacteria	Genus:Dyella	3.68559	3.13971	0.000160042
AMF > Control	Planctomycetota	Genus:UBA10511	0.724038	3.22089	0.0140893
AMF > Control	Firmicutes	Genus:Alicyclobacillus	0.679142	2.83996	0.0146877
AMF > Control	Proteobacteria	Genus:Mesorhizobium	2.37456	9.1034	0.00115651
AMF > Control	Bacteroidota	Genus:Mucilaginibacter	1.25989	1.74704	0.00995049
AMF > Control	Proteobacteria	Family:Rhodanobacteraceae	1.44031	2.02005	0.00162238
AMF > Control	Proteobacteria	Family:Micropepsaceae	2.00987	1.62726	0.000401853
AMF > Control	Proteobacteria	Genus:Bordetella	0.903683	2.13224	0.00129431
AMF > EBPR	Proteobacteria	Genus:Aromatoleum	2.61851	8.28556	8.76828e-05
AMF > EBPR	Chloroflexota	Genus:Kouleothrix	1.06364	4.85299	0.0239733
AMF > EBPR	Bacteroidota	Family:Chitinophagaceae	2.62758	6.71341	8.76828e-05
AMF > EBPR	Bacteroidota	Genus:OLB10	1.12821	5.54317	0.0168269
AMF > EBPR	Proteobacteria	Genus:Rhizomicrobium	1.20525	5.45939	0.0151611
AMF > EBPR	Proteobacteria	Genus:Paracoccus	1.293	6.63957	0.013721
AMF > EBPR	Proteobacteria	Genus:Thauera	1.92997	7.03654	0.00189926
AMF > EBPR	Actinobacteriota	Genus:Nocardioides	2.21391	2.45786	8.76828e-05
AMF > EBPR	Actinobacteriota	Genus:Leifsonia	1.01551	4.96498	0.0470877
AMF > EBPR	Proteobacteria	Genus:Caballeronia	2.53079	6.65575	8.76828e-05
AMF > EBPR	Actinobacteriota	Genus:Aeromicrobium	2.57394	6.97362	8.76828e-05
AMF > EBPR	Proteobacteria	Genus:Nitrosomonas	2.31712	7.38357	8.81714e-05
AMF > EBPR	Actinobacteriota	Family:Dermatophilaceae	3.00467	10.1748	8.76828e-05
AMF > EBPR	Bacteroidota	Genus:JC017	1.45775	5.02276	0.00328855
AMF > EBPR	Firmicutes	Genus:Priestia	1.41613	6.31911	0.0150074
AMF > EBPR	Proteobacteria	Genus:Pandoraea	2.7633	7.01957	8.76828e-05
AMF > EBPR	Proteobacteria	Genus:Pseudolabrys	0.614692	0.98844	0.0213399
AMF > EBPR	Planctomycetota	Genus:Urbifossiella	1.45899	1.93233	0.000233091
AMF > EBPR	Proteobacteria	Genus:Luteibacter	2.93639	7.52651	8.76828e-05
AMF > EBPR	Actinobacteriota	Genus:Spirillospora	3.06647	8.20184	8.76828e-05
AMF > EBPR	Bacteroidota	Genus:Edaphocola	1.74498	5.95088	0.00233102
AMF > EBPR	Firmicutes	Genus:Cohnella	1.77898	6.21434	0.00224691
AMF > EBPR	Proteobacteria	Genus:Rhodanobacter	1.2427	0.951363	0.00819017
AMF > EBPR	Bacteroidota	Genus:Haoranjiania	2.20248	6.29047	9.34356e-05
AMF > EBPR	Chloroflexota	Order:Thermomicrobiales	1.29606	6.34054	0.0176189
AMF > EBPR	Proteobacteria	Family:Stappiaceae	2.62841	7.01222	8.88825e-05
AMF > EBPR	Bacteroidota	Genus:OLB8	1.62283	5.36837	0.00025779
AMF > EBPR	Planctomycetota	Genus:Singulisphaera	3.54238	3.39634	8.76828e-05
AMF > EBPR	Proteobacteria	Genus:Sphingopyxis	1.72784	5.75161	0.00236651
AMF > EBPR	Proteobacteria	Genus:Mesorhizobium	3.39901	8.63525	8.76828e-05
AMF > EBPR	Proteobacteria	Genus:Berkiella	1.25253	6.22243	0.0153491
AMF > EBPR	Proteobacteria	Genus:Dokdonella	1.89506	7.58102	0.00243527
AMF > EBPR_AMF	Proteobacteria	Genus:Aromatoleum	1.9804	7.49834	0.00175785
AMF > EBPR_AMF	Bacteroidota	Family:Chitinophagaceae	2.36633	6.76122	9.76411e-07
AMF > EBPR_AMF	Bacteroidota	Genus:OLB10	1.19799	5.35006	0.0132031
AMF > EBPR_AMF	Proteobacteria	Genus:Rhizomicrobium	2.60294	7.20593	1.8026e-06
AMF > EBPR_AMF	Proteobacteria	Genus:Paracoccus	0.966712	4.86858	0.0387261
AMF > EBPR_AMF	Firmicutes	Genus:Paenibacillus	1.33186	5.24582	0.00959984
AMF > EBPR_AMF	Actinobacteriota	Genus:Nocardioides	1.02859	1.31064	0.00917728
AMF > EBPR_AMF	Dependentiae	Genus:Vermiphilus	1.30694	4.61226	0.00357578
AMF > EBPR_AMF	Chlamydiota	Genus:HS-T3	1.02229	3.92572	0.0164691
AMF > EBPR_AMF	Proteobacteria	Genus:Caballeronia	1.25917	6.11471	0.00903676
AMF > EBPR_AMF	Bacteroidota	Genus:Agriterribacter	0.977265	5.14857	0.0391691
AMF > EBPR_AMF	Bacteroidota	Genus:Parafilimonas	1.25921	4.85179	0.00961384
AMF > EBPR_AMF	Actinobacteriota	Genus:Aeromicrobium	1.29736	5.52007	0.00962731
AMF > EBPR_AMF	Proteobacteria	Genus:Nitrosomonas	2.91169	7.06832	0
AMF > EBPR_AMF	Actinobacteriota	Family:Dermatophilaceae	3.66676	9.16207	0
AMF > EBPR_AMF	Myxococcota	Family:Haliangiaceae	1.54899	5.42163	0.00244116
AMF > EBPR_AMF	Myxococcota	Genus:WRKR01	2.58445	6.65271	0
AMF > EBPR_AMF	Proteobacteria	Genus:Pandoraea	1.96173	6.80154	0.00152143
AMF > EBPR_AMF	Proteobacteria	Genus:Pseudolabrys	0.608153	1.06579	0.0232457
AMF > EBPR_AMF	Firmicutes	Genus:Paenibacillus	0.623685	1.16904	0.0227595
AMF > EBPR_AMF	Firmicutes	Genus:VKM-B-2647	2.39034	6.40431	0
AMF > EBPR_AMF	Planctomycetota	Genus:Urbifossiella	1.15934	2.63872	0.00130757
AMF > EBPR_AMF	Proteobacteria	Genus:Luteibacter	1.07993	6.17993	0.0382892
AMF > EBPR_AMF	Actinobacteriota	Genus:Spirillospora	3.39955	9.07884	0
AMF > EBPR_AMF	Proteobacteria	Genus:Paraburkholderia	0.978923	1.5046	0.00174359
AMF > EBPR_AMF	Firmicutes	Genus:Cohnella	1.82825	6.75008	0.00150215
AMF > EBPR_AMF	Proteobacteria	Genus:Rhodanobacter	1.72362	1.58381	0.00051507
AMF > EBPR_AMF	Bdellovibrionota	Genus:GWA1-52-35	1.16251	5.12812	0.00933857
AMF > EBPR_AMF	Omnitrophota	Family:UBA2337	1.01927	5.42707	0.0452261
AMF > EBPR_AMF	Proteobacteria	Family:Stappiaceae	1.28177	5.86542	0.0103978
AMF > EBPR_AMF	Myxococcota	Order:Polyangiales	1.22264	6.69949	0.0169437
AMF > EBPR_AMF	Planctomycetota	Genus:Zavarzinella	1.17052	4.40572	0.00912919
AMF > EBPR_AMF	Acidobacteriota	Genus:Edaphobacter	1.31368	6.63795	0.0117612
AMF > EBPR_AMF	Planctomycetota	Genus:Singulisphaera	2.42953	3.01635	3.98933e-06
AMF > EBPR_AMF	Proteobacteria	Genus:Mesorhizobium	3.29013	8.37734	0
AMF > EBPR_AMF	Proteobacteria	Genus:UBA6145	1.45532	5.40368	0.00204134
AMF > EBPR_AMF	Proteobacteria	Family:Sphingomonadaceae	1.10078	5.60221	0.0295273
AMF > EBPR_AMF	Proteobacteria	Genus:Berkiella	1.24938	5.39858	0.0106693
AMF > EBPR_AMF	Proteobacteria	Genus:Dokdonella	3.40141	8.23422	0
AMF > EBPR_AMF	Verrucomicrobiota	Genus:ER46	1.20337	6.20208	0.00947929
AMF > Vermont	Proteobacteria	Family:Devosiaceae	1.18103	6.87451	0.0397982
AMF > Vermont	Proteobacteria	Family:Usitatibacteraceae	3.13975	8.18312	9.70163e-05
AMF > Vermont	Proteobacteria	Genus:Rhizomicrobium	2.03031	6.3789	0.00107754
AMF > Vermont	Dependentiae	Genus:Vermiphilus	1.23448	5.68022	0.0165536
AMF > Vermont	Acidobacteriota	Genus:SCN-69-37	3.02561	8.36077	9.70163e-05
AMF > Vermont	Actinobacteriota	Family:Streptomycetaceae	1.7251	4.00717	9.70163e-05
AMF > Vermont	Bacteroidota	Genus:Chryseolinea	2.43708	7.88166	0.00130108
AMF > Vermont	Proteobacteria	Family:Methylophilaceae	3.39481	9.32678	9.70163e-05
AMF > Vermont	Armatimonadota	Genus:Fimbriimonas	1.24987	5.74835	0.0154412
AMF > Vermont	Actinobacteriota	Genus:Aeromicrobium	1.2175	6.72158	0.0437315
AMF > Vermont	Actinobacteriota	Family:Micrococcaceae	1.98997	6.56858	0.00238937
AMF > Vermont	Actinobacteriota	Genus:Actinocatenispora	3.01498	8.66804	9.70163e-05
AMF > Vermont	Actinobacteriota	Genus:Baekduia	1.9465	6.54073	0.00126102
AMF > Vermont	Verrucomicrobiota	Genus:Prosthecobacter	2.93241	8.06658	9.70163e-05
AMF > Vermont	Proteobacteria	Genus:Pandoraea	2.98476	8.21022	9.70163e-05
AMF > Vermont	Actinobacteriota	Genus:Actinospica	3.42484	8.94768	9.70163e-05
AMF > Vermont	Proteobacteria	Family:Nevskiaceae	1.50421	6.59782	0.0096916
AMF > Vermont	Proteobacteria	Genus:Pusillimonas	2.79087	7.73545	9.70163e-05
AMF > Vermont	Proteobacteria	Genus:Candidimonas	1.49734	5.91183	0.00872908
AMF > Vermont	Actinobacteriota	Genus:VAYN01	2.77884	7.50431	9.70163e-05
AMF > Vermont	Actinobacteriota	Genus:Spirillospora	3.88999	9.8742	9.70163e-05
AMF > Vermont	Firmicutes	Genus:Cohnella	1.10696	4.93957	0.0265277
AMF > Vermont	Proteobacteria	Genus:Rhodanobacter	0.99447	0.771656	0.0342317
AMF > Vermont	Bacteroidota	Genus:Haoranjiania	2.80804	7.40252	9.70163e-05
AMF > Vermont	Chloroflexota	Order:Thermomicrobiales	1.37053	5.49428	0.0102473
AMF > Vermont	Proteobacteria	Genus:Nevskia	1.66767	6.81403	0.00302618
AMF > Vermont	Bacteroidota	Genus:Flavipsychrobacter	1.44089	5.88407	0.0103558
AMF > Vermont	Chloroflexota	Genus:GWC2-73-18	1.61617	7.49965	0.0108435
AMF > Vermont	Proteobacteria	Genus:Dyella	1.30001	1.03929	0.00483617
AMF > Vermont	Proteobacteria	Genus:Mesorhizobium	1.58243	7.17784	0.00921845
AMF > Vermont	Myxococcota	Genus:SLQV01	1.09062	5.27756	0.0304429
AMF > Vermont_AMF	Proteobacteria	Family:Usitatibacteraceae	1.98235	9.81637	0.00213865
AMF > Vermont_AMF	Proteobacteria	Genus:Devosia	2.82345	2.63528	0
AMF > Vermont_AMF	Firmicutes	Class:Bacilli	1.81713	2.82405	3.88852e-05
AMF > Vermont_AMF	Actinobacteriota	Genus:Streptomyces	1.51906	3.08438	0.00050827
AMF > Vermont_AMF	Proteobacteria	Family:Xanthomonadaceae	1.65244	1.50699	0.000769719
AMF > Vermont_AMF	Bacteroidota	Genus:Niastella	1.01796	2.25674	0.0166519
AMF > Vermont_AMF	Acidobacteriota	Genus:SCN-69-37	1.92132	10.015	0.00297295
AMF > Vermont_AMF	Firmicutes	Genus:Bacillus	1.78042	2.81723	0.000617028
AMF > Vermont_AMF	Actinobacteriota	Family:Streptomycetaceae	1.49208	4.02577	0.000677965
AMF > Vermont_AMF	Bacteroidota	Genus:Chryseolinea	1.60527	9.78091	0.00765604
AMF > Vermont_AMF	Proteobacteria	Family:Labraceae	1.66698	1.78421	0.00527769
AMF > Vermont_AMF	Proteobacteria	Genus:Massilia	0.728036	2.00588	0.0485153
AMF > Vermont_AMF	Firmicutes	Genus:Neobacillus	1.6246	2.74877	0.000403159
AMF > Vermont_AMF	Myxococcota	Family:Polyangiaceae	1.14144	5.19179	0.00254524
AMF > Vermont_AMF	Proteobacteria	Genus:Frateuria	1.79561	2.22525	0.000165544
AMF > Vermont_AMF	Bacteroidota	Genus:SB25	2.34175	3.90313	7.68711e-05
AMF > Vermont_AMF	Firmicutes	Genus:Pullulanibacillus	1.66862	2.99232	0.000375506
AMF > Vermont_AMF	Verrucomicrobiota	Genus:Prosthecobacter	1.53132	8.23145	0.00589378
AMF > Vermont_AMF	Bacteroidota	Genus:Arachidicoccus	0.771148	2.66623	0.0373756
AMF > Vermont_AMF	Planctomycetota	Genus:Urbifossiella	0.567325	2.41797	0.0420379
AMF > Vermont_AMF	Actinobacteriota	Genus:Spirillospora	4.55872	11.4257	0
AMF > Vermont_AMF	Proteobacteria	Genus:Ramlibacter	2.09591	1.93993	8.48006e-05
AMF > Vermont_AMF	Bacteroidota	Genus:Edaphocola	1.95728	8.79167	0.00283217
AMF > Vermont_AMF	Proteobacteria	Genus:Rhizobium	2.01281	2.32156	4.41715e-05
AMF > Vermont_AMF	Proteobacteria	Genus:Rhodanobacter	2.22001	2.53165	3.50269e-05
AMF > Vermont_AMF	Planctomycetota	Family:Pirellulaceae	0.734879	3.08639	0.0361448
AMF > Vermont_AMF	Proteobacteria	Genus:Dyella	1.94258	2.34208	0.000379752
AMF > Vermont_AMF	Firmicutes	Genus:Alicyclobacillus	1.15937	3.69121	0.00101968
AMF > Vermont_AMF	Proteobacteria	Genus:Mesorhizobium	1.66843	10.0408	0.0039015
AMF > Vermont_AMF	Bacteroidota	Genus:Chitinophaga	1.08745	1.48835	0.0273704
AMF > Vermont_AMF	Bacteroidota	Genus:Mucilaginibacter	1.44548	2.41828	0.00185239
AMF > Vermont_AMF	Proteobacteria	Family:Rhodanobacteraceae	1.23331	1.90774	0.00315279
AMF > Vermont_AMF	Proteobacteria	Family:Micropepsaceae	1.52709	2.01367	0.00625198
Control > AMF	Verrucomicrobiota	Genus:DSWX01	-1.98645	-5.46917	5.09188e-05
Control > AMF	Planctomycetota	Genus:Tundrisphaera	-0.957451	-3.80383	0.0206762
Control > AMF	Myxococcota	Genus:REDI01	-1.00542	-4.28282	0.0265913
Control > AMF	Proteobacteria	Genus:Castellaniella	-1.05985	-5.90857	0.0258452
Control > AMF	Planctomycetota	Genus:Planctopirus	-2.62984	-7.03598	0
Control > AMF	Gemmatimonadota	Family:Gemmatimonadaceae	-1.1735	-5.16279	0.0170207
Control > AMF	Planctomycetota	Genus:Pirellula	-2.5304	-6.90333	0
Control > AMF	Proteobacteria	Genus:Phenylobacterium	-2.56212	-6.63709	0
Control > AMF	Proteobacteria	Genus:Asprobacter	-1.07695	-5.24167	0.0262394
Control > AMF	Actinobacteriota	Family:Microbacteriaceae	-2.30431	-6.27417	1.69786e-05
Control > AMF	Proteobacteria	Genus:Pseudolabrys	-1.1852	-5.03502	0.0180365
Control > AMF	Acidobacteriota	Family:UBA5704	-0.915211	-4.33175	0.0294123
Control > AMF	Gemmatimonadota	Genus:Gemmatimonas	-1.50446	-5.5112	0.00307978
Control > AMF	Acidobacteriota	Genus:WHSN01	-1.78568	-6.37489	0.00270881
Control > AMF	Proteobacteria	Genus:Noviherbaspirillum	-1.31443	-7.37478	0.0259502
Control > AMF	Proteobacteria	Genus:Parvibaculum	-1.05674	-5.09294	0.0260789
Control > AMF	Bacteroidota	Family:Sphingobacteriaceae	-1.07047	-4.42245	0.0208916
Control > AMF	Planctomycetota	Genus:Singulisphaera	-1.79723	-6.02457	0.00276416
Control > AMF	Proteobacteria	Genus:Dongia	-1.47642	-4.96194	0.00390899
Control > AMF	Verrucomicrobiota	Genus:Pedosphaera	-2.29504	-6.04936	0
Control > EBPR	Proteobacteria	Genus:Aromatoleum	2.069	6.76445	2.38138e-06
Control > EBPR	Chloroflexota	Genus:Kouleothrix	0.723826	3.26864	0.0495177
Control > EBPR	Myxococcota	Family:Myxococcaceae	2.20702	5.4081	9.70723e-06
Control > EBPR	Bacteroidota	Family:Chitinophagaceae	1.97356	4.99073	3.8326e-05
Control > EBPR	Bacteroidota	Genus:OLB10	0.703911	3.65522	0.0488139
Control > EBPR	Proteobacteria	Genus:Afipia	1.96193	4.78543	3.54558e-05
Control > EBPR	Gemmatimonadota	Genus:Roseisolibacter	1.1697	3.75717	0.0042201
Control > EBPR	Proteobacteria	Genus:Rhizomicrobium	0.891791	3.90661	0.0185428
Control > EBPR	Proteobacteria	Genus:Paracoccus	1.00506	5.21222	0.0201145
Control > EBPR	Proteobacteria	Genus:Thauera	1.42138	5.37317	0.00221423
Control > EBPR	Planctomycetota	Genus:Planctopirus	1.38294	3.81772	0.000630704
Control > EBPR	Proteobacteria	Genus:Reyranella	2.44112	6.04026	0
Control > EBPR	Proteobacteria	Genus:Caballeronia	1.93557	4.90134	5.18736e-05
Control > EBPR	Planctomycetota	Genus:Pirellula	2.07725	5.38418	1.13539e-05
Control > EBPR	Proteobacteria	Genus:Phenylobacterium	1.71784	5.81452	0.00188078
Control > EBPR	Actinobacteriota	Genus:Aeromicrobium	1.92086	5.44929	5.1887e-06
Control > EBPR	Proteobacteria	Genus:Nitrosomonas	1.84427	5.78405	6.85453e-05
Control > EBPR	Actinobacteriota	Family:Dermatophilaceae	2.64945	8.60431	0
Control > EBPR	Actinobacteriota	Family:Microbacteriaceae	0.913758	4.31664	0.0323429
Control > EBPR	Firmicutes	Genus:Priestia	0.95091	4.66857	0.0204755
Control > EBPR	Proteobacteria	Genus:Pseudolabrys	2.71465	6.43395	0
Control > EBPR	Planctomycetota	Genus:UBA2421	1.11071	4.10287	0.00440037
Control > EBPR	Proteobacteria	Genus:Luteibacter	2.27476	5.86693	0
Control > EBPR	Bacteroidota	Genus:Edaphocola	1.22627	4.46837	0.00274524
Control > EBPR	Bacteroidota	Genus:Haoranjiania	1.65959	4.93113	0.000204601
Control > EBPR	Planctomycetota	Family:Pirellulaceae	2.72475	6.99424	0
Control > EBPR	Chloroflexota	Order:Thermomicrobiales	0.91026	4.54356	0.0251918
Control > EBPR	Proteobacteria	Family:Stappiaceae	1.89347	5.40008	3.59298e-05
Control > EBPR	Proteobacteria	Genus:Noviherbaspirillum	1.11749	5.79683	0.0240178
Control > EBPR	Bacteroidota	Genus:OLB8	1.20037	3.90527	0.00845967
Control > EBPR	Planctomycetota	Genus:Singulisphaera	3.83325	9.47606	0
Control > EBPR	Proteobacteria	Genus:Sphingopyxis	1.29814	4.47183	0.0027599
Control > EBPR	Proteobacteria	Genus:Berkiella	0.935496	4.71293	0.0238022
Control > EBPR	Proteobacteria	Genus:Dokdonella	1.52421	6.02656	0.00237251
Control > EBPR_AMF	Proteobacteria	Genus:Aromatoleum	1.64604	6.17971	0.00234867
Control > EBPR_AMF	Myxococcota	Family:Myxococcaceae	1.06756	4.96548	0.0159213
Control > EBPR_AMF	Bacteroidota	Family:Chitinophagaceae	2.00273	5.22301	2.94677e-05
Control > EBPR_AMF	Bacteroidota	Genus:OLB10	0.828303	3.57297	0.0257367
Control > EBPR_AMF	Gemmatimonadota	Genus:Roseisolibacter	2.08579	5.33026	2.23814e-05
Control > EBPR_AMF	Proteobacteria	Genus:Rhizomicrobium	1.86881	5.58372	3.91519e-05
Control > EBPR_AMF	Firmicutes	Genus:Paenibacillus	0.836227	3.5399	0.0268369
Control > EBPR_AMF	Planctomycetota	Genus:Planctopirus	1.48155	4.7132	0.00248912
Control > EBPR_AMF	Proteobacteria	Genus:Reyranella	2.39016	5.97977	2.12334e-06
Control > EBPR_AMF	Dependentiae	Genus:Vermiphilus	0.878683	3.22981	0.0196327
Control > EBPR_AMF	Proteobacteria	Genus:Caballeronia	0.997191	4.48076	0.0194236
Control > EBPR_AMF	Planctomycetota	Genus:Pirellula	2.16477	5.35267	6.35282e-06
Control > EBPR_AMF	Bacteroidota	Genus:Parafilimonas	0.853341	3.37607	0.0263139
Control > EBPR_AMF	Actinobacteriota	Genus:Aeromicrobium	0.931687	4.01635	0.0170226
Control > EBPR_AMF	Proteobacteria	Genus:Nitrosomonas	2.14009	5.73989	1.12614e-05
Control > EBPR_AMF	Actinobacteriota	Family:Dermatophilaceae	3.2453	7.56257	0
Control > EBPR_AMF	Myxococcota	Family:Haliangiaceae	1.18566	4.05083	0.00612621
Control > EBPR_AMF	Myxococcota	Genus:WRKR01	2.11546	5.30986	4.9086e-06
Control > EBPR_AMF	Proteobacteria	Genus:Pseudolabrys	2.63714	6.64674	0
Control > EBPR_AMF	Firmicutes	Genus:VKM-B-2647	1.91675	4.89321	8.05533e-05
Control > EBPR_AMF	Planctomycetota	Genus:UBA2421	1.87616	5.32042	7.47358e-05
Control > EBPR_AMF	Planctomycetota	Family:Pirellulaceae	2.8447	7.11775	0
Control > EBPR_AMF	Bdellovibrionota	Genus:GWA1-52-35	0.801496	3.4844	0.0325159
Control > EBPR_AMF	Acidobacteriota	Genus:WHSN01	0.966562	4.47645	0.0177945
Control > EBPR_AMF	Proteobacteria	Family:Stappiaceae	1.02374	4.5869	0.0209662
Control > EBPR_AMF	Myxococcota	Order:Polyangiales	0.966805	5.16891	0.0370773
Control > EBPR_AMF	Acidobacteriota	Genus:Edaphobacter	0.997503	5.04341	0.0222302
Control > EBPR_AMF	Planctomycetota	Genus:Singulisphaera	3.72208	9.1929	0
Control > EBPR_AMF	Proteobacteria	Genus:UBA6145	1.05235	3.87718	0.00748118
Control > EBPR_AMF	Proteobacteria	Genus:Dongia	0.850137	3.97779	0.0246949
Control > EBPR_AMF	Proteobacteria	Genus:Berkiella	0.920043	3.91664	0.0233143
Control > EBPR_AMF	Proteobacteria	Genus:Dokdonella	2.67268	6.72531	0
Control > EBPR_AMF	Verrucomicrobiota	Genus:ER46	0.932662	4.52546	0.0251329
Control > Vermont	Proteobacteria	Family:Usitatibacteraceae	2.36102	6.78837	0
Control > Vermont	Proteobacteria	Genus:Rhizomicrobium	1.50291	4.83778	0.00145796
Control > Vermont	Proteobacteria	Genus:Castellaniella	0.877778	4.72348	0.045706
Control > Vermont	Proteobacteria	Genus:Reyranella	2.35279	5.81653	5.87561e-06
Control > Vermont	Dependentiae	Genus:Vermiphilus	0.857009	4.1019	0.0369313
Control > Vermont	Acidobacteriota	Genus:SCN-69-37	2.3909	6.52383	0
Control > Vermont	Bacteroidota	Genus:Chryseolinea	1.96846	6.36431	0.00130509
Control > Vermont	Proteobacteria	Family:Methylophilaceae	2.64318	7.71443	0
Control > Vermont	Planctomycetota	Genus:Pirellula	1.95627	5.3489	4.26244e-05
Control > Vermont	Armatimonadota	Genus:Fimbriimonas	0.824692	3.88975	0.0288415
Control > Vermont	Myxococcota	Family:Polyangiaceae	1.21376	5.57529	0.0137953
Control > Vermont	Actinobacteriota	Family:Micrococcaceae	1.48157	5.15723	0.00215174
Control > Vermont	Actinobacteriota	Genus:Actinocatenispora	2.45646	6.76677	0
Control > Vermont	Actinobacteriota	Genus:Baekduia	1.46519	4.80178	0.00160281
Control > Vermont	Verrucomicrobiota	Genus:Prosthecobacter	2.46245	6.15812	2.25523e-06
Control > Vermont	Actinobacteriota	Genus:Actinospica	2.64629	7.47876	0
Control > Vermont	Proteobacteria	Family:Nevskiaceae	1.15892	4.93267	0.0135965
Control > Vermont	Proteobacteria	Genus:Candidimonas	1.09365	4.2503	0.0125818
Control > Vermont	Actinobacteriota	Genus:VAYN01	2.07917	5.9404	2.26508e-06
Control > Vermont	Bacteroidota	Genus:Haoranjiania	2.24234	5.86248	5.93461e-06
Control > Vermont	Planctomycetota	Family:Pirellulaceae	1.5447	5.7618	0.00227578
Control > Vermont	Chloroflexota	Order:Thermomicrobiales	0.965163	3.9069	0.0201386
Control > Vermont	Bacteroidota	Genus:Flavipsychrobacter	0.980524	3.9971	0.0151257
Control > Vermont	Proteobacteria	Genus:Noviherbaspirillum	1.93101	6.85038	0.00120565
Control > Vermont	Chloroflexota	Genus:GWC2-73-18	1.19026	5.57944	0.0172601
Control > Vermont	Proteobacteria	Genus:Parvibaculum	1.0173	4.23104	0.0142215
Control > Vermont	Planctomycetota	Genus:Singulisphaera	1.80073	6.07464	0.00179209
Control > Vermont_AMF	Myxococcota	Family:Myxococcaceae	1.32575	7.31582	0.0207237
Control > Vermont_AMF	Proteobacteria	Family:Usitatibacteraceae	1.8459	8.62516	0.0060456
Control > Vermont_AMF	Proteobacteria	Genus:Afipia	1.43093	6.83731	0.0174752
Control > Vermont_AMF	Proteobacteria	Genus:Devosia	1.62914	3.08663	0.0162446
Control > Vermont_AMF	Firmicutes	Class:Bacilli	1.66948	1.95529	0.000224502
Control > Vermont_AMF	Acidobacteriota	Genus:SCN-69-37	1.83708	8.82221	0.00717716
Control > Vermont_AMF	Firmicutes	Genus:Bacillus	1.13811	1.42284	0.0165154
Control > Vermont_AMF	Bacteroidota	Genus:Chryseolinea	1.32522	8.56824	0.0235604
Control > Vermont_AMF	Myxococcota	Family:Polyangiaceae	2.15701	9.72029	0.00187456
Control > Vermont_AMF	Verrucomicrobiota	Genus:Prosthecobacter	1.27685	6.73013	0.0211344
Control > Vermont_AMF	Proteobacteria	Genus:Ramlibacter	1.10918	0.747828	0.0212303
Control > Vermont_AMF	Bacteroidota	Genus:Edaphocola	1.70221	7.41528	0.00675781
Control > Vermont_AMF	Proteobacteria	Genus:Rhizobium	1.21212	1.73966	0.0130209
Control > Vermont_AMF	Proteobacteria	Genus:Rhodanobacter	1.05297	1.48204	0.0197007
Control > Vermont_AMF	Planctomycetota	Family:Pirellulaceae	2.53329	9.28555	0.00142351
Control > Vermont_AMF	Proteobacteria	Genus:Noviherbaspirillum	1.77566	9.09283	0.00820603
Control > Vermont_AMF	Planctomycetota	Genus:Singulisphaera	1.26176	8.35935	0.0209275
EBPR > AMF	Proteobacteria	Family:Moraxellaceae	-1.75064	-4.08273	0
EBPR > AMF	Verrucomicrobiota	Genus:DSWX01	-3.13409	-7.99554	0
EBPR > AMF	Planctomycetota	Genus:Tundrisphaera	-1.50507	-6.17433	0.00368525
EBPR > AMF	Myxococcota	Genus:REDI01	-1.52114	-6.99016	0.00401777
EBPR > AMF	Firmicutes	Class:Bacilli	-1.07553	-1.94578	0.0126935
EBPR > AMF	Proteobacteria	Genus:Castellaniella	-1.6252	-8.26631	0.00643745
EBPR > AMF	Planctomycetota	Genus:Planctopirus	-3.11257	-3.228	0
EBPR > AMF	Proteobacteria	Family:Xanthomonadaceae	-1.38124	-1.08742	0.000988912
EBPR > AMF	Bacteroidota	Genus:Niastella	-0.734025	-0.882874	0.0485081
EBPR > AMF	Firmicutes	Genus:Bacillus	-1.07229	-1.61917	0.00426993
EBPR > AMF	Planctomycetota	Genus:Gemmata	-1.60749	-3.26969	6.19128e-06
EBPR > AMF	Proteobacteria	Genus:Pseudomonas	-3.23729	-4.71493	0
EBPR > AMF	Gemmatimonadota	Family:Gemmatimonadaceae	-1.62844	-7.37754	0.00366214
EBPR > AMF	Planctomycetota	Genus:Pirellula	-0.95593	-1.4549	0.0190299
EBPR > AMF	Actinobacteriota	Class:Actinomycetia	-0.554338	-2.92159	0.0444413
EBPR > AMF	Proteobacteria	Family:Labraceae	-1.00751	-1.10825	0.00536554
EBPR > AMF	Proteobacteria	Genus:Solimonas	-2.26877	-4.10008	0
EBPR > AMF	Firmicutes	Genus:Neobacillus	-1.38689	-1.58637	0.000526369
EBPR > AMF	Myxococcota	Family:Polyangiaceae	-1.31744	-6.62348	0.0141013
EBPR > AMF	Planctomycetota	Genus:Caulifigura	-1.01338	-1.55033	0.00181733
EBPR > AMF	Proteobacteria	Genus:Cavicella	-1.0492	-4.091	0.00102969
EBPR > AMF	Proteobacteria	Genus:Asprobacter	-1.52806	-7.50477	0.00667018
EBPR > AMF	Planctomycetota	Genus:Planctomyces	-0.849452	-1.65578	0.0200761
EBPR > AMF	Bdellovibrionota	Genus:Peredibacter	-0.803549	-1.88774	0.0109348
EBPR > AMF	Cyanobacteria	Class:Vampirovibrionia	-1.05592	-5.55851	0.0190847
EBPR > AMF	Firmicutes	Genus:Pullulanibacillus	-0.903138	-1.88533	0.0114439
EBPR > AMF	Kingdom:Bacteria	Kingdom:Bacteria	-1.0715	-2.72495	0.00347317
EBPR > AMF	Proteobacteria	Genus:Novosphingobium	-1.65031	-2.10111	0.000113568
EBPR > AMF	Chloroflexota	Class:Limnocylindria	-1.13891	-5.58749	0.0170233
EBPR > AMF	Proteobacteria	Class:Alphaproteobacteria	-1.65967	-7.13243	0.00361693
EBPR > AMF	Proteobacteria	Genus:Ramlibacter	-1.13737	-0.984814	0.00811685
EBPR > AMF	Proteobacteria	Family:Burkholderiaceae	-0.866191	-1.29467	0.00576242
EBPR > AMF	Acidobacteriota	Family:UBA5704	-1.5102	-6.89841	0.0048188
EBPR > AMF	Gemmatimonadota	Genus:Gemmatimonas	-2.34425	-8.06968	0.000925672
EBPR > AMF	Planctomycetota	Family:Isosphaeraceae	-0.557032	-2.48221	0.0116457
EBPR > AMF	Acidobacteriota	Genus:WHSN01	-2.4392	-8.84667	0.000693889
EBPR > AMF	Proteobacteria	Genus:Rhodopila	-3.1074	-7.62019	0
EBPR > AMF	Proteobacteria	Genus:Noviherbaspirillum	-0.263468	-1.64489	0.0294692
EBPR > AMF	Gemmatimonadota	Genus:Longimicrobium	-1.30111	-6.78293	0.00917526
EBPR > AMF	Proteobacteria	Genus:Parvibaculum	-1.51956	-7.51638	0.00500565
EBPR > AMF	Bacteroidota	Family:Sphingobacteriaceae	-1.57055	-7.02773	0.00491962
EBPR > AMF	Proteobacteria	Genus:Luteimonas	-1.31517	-7.26869	0.015724
EBPR > AMF	Bacteroidota	Genus:Ohtaekwangia	-1.29336	-7.33293	0.0131339
EBPR > AMF	Proteobacteria	Genus:Methylovorus	-1.41284	-3.11116	1.01965e-05
EBPR > AMF	Proteobacteria	Genus:UBA5216	-1.29435	-6.98953	0.0173742
EBPR > AMF	Cyanobacteria	Genus:GCA-2770975	-1.40387	-2.56922	0.00121219
EBPR > AMF	Bacteroidota	Genus:Chitinophaga	-1.62467	-1.30501	0.000936691
EBPR > AMF	Bacteroidota	Genus:Pararcticibacter	-1.24953	-6.76278	0.016458
EBPR > AMF	Proteobacteria	Genus:Dongia	-0.568116	-2.16242	0.0164141
EBPR > AMF	Proteobacteria	Family:Rhodanobacteraceae	-1.28421	-1.39029	0.00645356
EBPR > AMF	Proteobacteria	Family:Micropepsaceae	-1.09451	-0.679382	0.00644801
EBPR > AMF	Bacteroidota	Genus:Ginsengibacter	-1.31566	-7.31667	0.011729
EBPR > AMF	Verrucomicrobiota	Genus:Pedosphaera	-3.05327	-8.59468	0
EBPR > Control	Proteobacteria	Family:Moraxellaceae	-1.71555	-4.15502	4.27478e-05
EBPR > Control	Bacteroidota	Genus:Dyadobacter	-1.01179	-3.24621	0.00321949
EBPR > Control	Firmicutes	Class:Bacilli	-1.70063	-2.95396	0.000734922
EBPR > Control	Actinobacteriota	Genus:Streptomyces	-1.99471	-2.82334	4.25311e-05
EBPR > Control	Proteobacteria	Family:Xanthomonadaceae	-2.40014	-2.10083	4.72719e-05
EBPR > Control	Bacteroidota	Genus:Niastella	-2.08335	-2.38643	4.446e-05
EBPR > Control	Firmicutes	Genus:Bacillus	-2.86507	-3.35927	4.20108e-05
EBPR > Control	Actinobacteriota	Family:Streptomycetaceae	-3.01894	-4.74336	4.20108e-05
EBPR > Control	Planctomycetota	Genus:Gemmata	-1.16883	-2.69218	0.000122893
EBPR > Control	Proteobacteria	Genus:Pseudomonas	-2.53611	-6.29509	4.20108e-05
EBPR > Control	Proteobacteria	Genus:Sphingomonas	-1.36182	-1.65662	0.00396096
EBPR > Control	Actinobacteriota	Class:Actinomycetia	-0.577663	-2.4202	0.0242126
EBPR > Control	Proteobacteria	Family:Labraceae	-2.10267	-2.38942	4.93889e-05
EBPR > Control	Proteobacteria	Genus:Solimonas	-2.47208	-4.53607	4.20108e-05
EBPR > Control	Proteobacteria	Genus:Massilia	-2.223	-3.0179	6.44563e-05
EBPR > Control	Firmicutes	Genus:Neobacillus	-3.05917	-3.89489	8.34007e-05
EBPR > Control	Proteobacteria	Genus:Frateuria	-2.2665	-2.29556	4.73859e-05
EBPR > Control	Proteobacteria	Genus:Cavicella	-1.36302	-5.61534	4.20108e-05
EBPR > Control	Bacteroidota	Genus:JC017	-2.42278	-3.9108	4.22691e-05
EBPR > Control	Planctomycetota	Genus:Planctomyces	-1.28538	-3.0331	0.0111526
EBPR > Control	Bdellovibrionota	Genus:Peredibacter	-0.59415	-2.66448	0.0252385
EBPR > Control	Firmicutes	Genus:Pullulanibacillus	-2.35812	-4.24247	4.77395e-05
EBPR > Control	Proteobacteria	Genus:Pandoraea	-1.4419	-2.86055	0.00509132
EBPR > Control	Proteobacteria	Family:Enterobacteriaceae	-1.69064	-2.40966	0.000696643
EBPR > Control	Kingdom:Bacteria	Kingdom:Bacteria	-1.94125	-5.09665	4.3303e-05
EBPR > Control	Proteobacteria	Genus:Novosphingobium	-3.21031	-3.21386	4.20108e-05
EBPR > Control	Bacteroidota	Genus:Arachidicoccus	-0.851648	-2.63663	0.0497331
EBPR > Control	Proteobacteria	Genus:Pusillimonas	-1.95521	-9.26676	0.00248819
EBPR > Control	Proteobacteria	Class:Alphaproteobacteria	-3.41537	-9.4155	4.20108e-05
EBPR > Control	Actinobacteriota	Genus:Spirillospora	-1.52099	-2.64937	0.000253798
EBPR > Control	Proteobacteria	Genus:Ramlibacter	-4.12452	-2.46387	4.20108e-05
EBPR > Control	Proteobacteria	Genus:Legionella	-1.92049	-8.117	0.00175273
EBPR > Control	Proteobacteria	Genus:Paraburkholderia	-2.23548	-2.49599	0.000321287
EBPR > Control	Proteobacteria	Family:Burkholderiaceae	-2.01189	-2.85652	0.00313053
EBPR > Control	Firmicutes	Genus:Cohnella	-0.65667	-2.42197	0.0374338
EBPR > Control	Planctomycetota	Family:Isosphaeraceae	-1.51645	-3.99126	7.39799e-05
EBPR > Control	Bacteroidota	Genus:Pelobium	-1.54563	-7.40468	0.00604422
EBPR > Control	Proteobacteria	Genus:Rhodopila	-1.52654	-7.91233	0.00615108
EBPR > Control	Proteobacteria	Genus:Acinetobacter	-2.00347	-9.4893	0.00156631
EBPR > Control	Proteobacteria	Genus:Nevskia	-3.33695	-9.97294	4.20108e-05
EBPR > Control	Proteobacteria	Genus:Dyella	-3.20756	-2.90705	4.20108e-05
EBPR > Control	Planctomycetota	Genus:UBA10511	-1.01489	-3.98981	0.00299625
EBPR > Control	Proteobacteria	Genus:Methylovorus	-1.62952	-3.57921	4.43492e-05
EBPR > Control	Cyanobacteria	Genus:GCA-2770975	-2.0617	-3.15395	7.59967e-05
EBPR > Control	Firmicutes	Genus:Alicyclobacillus	-3.36809	-4.59364	0.0037697
EBPR > Control	Bacteroidota	Genus:Chitinophaga	-2.40075	-1.9235	4.98032e-05
EBPR > Control	Bacteroidota	Genus:Mucilaginibacter	-2.69765	-2.35652	4.30432e-05
EBPR > Control	Proteobacteria	Family:Rhodanobacteraceae	-4.20493	-3.37098	4.20108e-05
EBPR > Control	Proteobacteria	Family:Micropepsaceae	-3.30271	-2.33928	4.20108e-05
EBPR > Control	Proteobacteria	Genus:Bordetella	-3.22939	-2.58114	4.24972e-05
EBPR > EBPR_AMF	Gemmatimonadota	Genus:Roseisolibacter	1.09492	1.04277	0.0105856
EBPR > EBPR_AMF	Proteobacteria	Genus:Rhizomicrobium	0.675684	1.60882	0.0465365
EBPR > EBPR_AMF	Bacteroidota	Genus:Fluviicola	0.993538	4.86128	0.0373943
EBPR > EBPR_AMF	Firmicutes	Genus:Paenibacillus	1.39436	5.90046	0.0101678
EBPR > EBPR_AMF	Proteobacteria	Genus:Castellaniella	1.29728	6.49041	0.0254872
EBPR > EBPR_AMF	Planctomycetota	Genus:Planctopirus	0.871594	1.19237	0.0387763
EBPR > EBPR_AMF	Bacteroidota	Genus:Niastella	1.73033	1.78805	0.00087035
EBPR > EBPR_AMF	Dependentiae	Genus:Vermiphilus	1.63076	5.73469	0.00178978
EBPR > EBPR_AMF	Actinobacteriota	Family:Streptomycetaceae	0.954104	0.771688	0.0292844
EBPR > EBPR_AMF	Chlamydiota	Genus:HS-T3	1.24182	4.78011	0.011977
EBPR > EBPR_AMF	Bacteroidota	Genus:Parafilimonas	1.37724	5.81395	0.00818601
EBPR > EBPR_AMF	Bdellovibrionota	Genus:Peredibacter	1.56821	2.40066	0.000482545
EBPR > EBPR_AMF	Myxococcota	Family:Haliangiaceae	1.73957	6.42356	0.00221747
EBPR > EBPR_AMF	Myxococcota	Genus:WRKR01	2.84884	7.78822	0
EBPR > EBPR_AMF	Firmicutes	Genus:VKM-B-2647	2.73451	7.27252	0
EBPR > EBPR_AMF	Proteobacteria	Genus:Paraburkholderia	1.0505	0.829352	0.0201274
EBPR > EBPR_AMF	Bdellovibrionota	Genus:GWA1-52-35	1.3709	5.90961	0.008746
EBPR > EBPR_AMF	Acidobacteriota	Genus:WHSN01	1.52462	6.85667	0.00741218
EBPR > EBPR_AMF	Omnitrophota	Family:UBA2337	1.16944	6.2884	0.0406795
EBPR > EBPR_AMF	Myxococcota	Order:Polyangiales	1.37975	7.66091	0.0155281
EBPR > EBPR_AMF	Planctomycetota	Genus:Zavarzinella	1.35354	5.72531	0.00826889
EBPR > EBPR_AMF	Proteobacteria	Genus:UBA6145	1.80664	6.1953	0.00239932
EBPR > EBPR_AMF	Bacteroidota	Genus:Chitinophaga	1.11119	1.05207	0.0135936
EBPR > EBPR_AMF	Proteobacteria	Family:Micropepsaceae	1.51093	0.820363	0.00103696
EBPR > EBPR_AMF	Verrucomicrobiota	Genus:Pedosphaera	1.14336	6.15874	0.0380312
EBPR > EBPR_AMF	Verrucomicrobiota	Genus:ER46	1.55246	6.97059	0.0105658
EBPR > Vermont	Proteobacteria	Family:Devosiaceae	1.24516	7.58689	0.0195129
EBPR > Vermont	Proteobacteria	Family:Moraxellaceae	1.01536	2.58138	0.000940938
EBPR > Vermont	Proteobacteria	Family:Usitatibacteraceae	3.55039	9.18721	0
EBPR > Vermont	Bacteroidota	Genus:Dyadobacter	0.71089	2.18248	0.0031812
EBPR > Vermont	Proteobacteria	Genus:Castellaniella	1.36589	7.25214	0.0108228
EBPR > Vermont	Actinobacteriota	Genus:Streptomyces	1.02538	0.853741	0.0260395
EBPR > Vermont	Bacteroidota	Genus:Niastella	1.40342	1.28647	0.00057924
EBPR > Vermont	Dependentiae	Genus:Vermiphilus	1.42063	6.61122	0.00724437
EBPR > Vermont	Acidobacteriota	Genus:SCN-69-37	3.36057	8.95376	0
EBPR > Vermont	Firmicutes	Genus:Bacillus	1.07367	1.26088	0.00949808
EBPR > Vermont	Actinobacteriota	Family:Streptomycetaceae	5.59859	4.8971	0
EBPR > Vermont	Proteobacteria	Genus:Pseudomonas	2.53292	4.18129	0
EBPR > Vermont	Bacteroidota	Genus:Chryseolinea	2.57816	8.71263	0.000653476
EBPR > Vermont	Proteobacteria	Family:Methylophilaceae	3.68227	10.1928	0
EBPR > Vermont	Proteobacteria	Genus:Solimonas	2.38941	3.12794	1.25685e-05
EBPR > Vermont	Armatimonadota	Genus:Fimbriimonas	1.42838	6.60174	0.00650539
EBPR > Vermont	Myxococcota	Family:Polyangiaceae	1.69696	8.2425	0.00407454
EBPR > Vermont	Proteobacteria	Genus:Frateuria	0.930585	0.60413	0.0277951
EBPR > Vermont	Actinobacteriota	Family:Micrococcaceae	2.04916	7.46164	0.000949044
EBPR > Vermont	Actinobacteriota	Genus:Actinocatenispora	3.48396	9.42442	0
EBPR > Vermont	Actinobacteriota	Genus:Baekduia	2.22699	7.263	0.000498473
EBPR > Vermont	Bdellovibrionota	Genus:Peredibacter	1.40954	2.9496	0.000342356
EBPR > Vermont	Firmicutes	Genus:Pullulanibacillus	0.64061	1.09187	0.0455399
EBPR > Vermont	Verrucomicrobiota	Genus:Prosthecobacter	3.48351	8.60121	0
EBPR > Vermont	Actinobacteriota	Genus:Actinospica	3.72709	10.0119	0
EBPR > Vermont	Proteobacteria	Family:Nevskiaceae	1.69876	7.40918	0.00350926
EBPR > Vermont	Proteobacteria	Genus:Pusillimonas	3.0056	8.62664	0
EBPR > Vermont	Proteobacteria	Class:Alphaproteobacteria	1.31207	6.64751	0.00945032
EBPR > Vermont	Proteobacteria	Genus:Candidimonas	1.69414	6.87393	0.00248802
EBPR > Vermont	Actinobacteriota	Genus:VAYN01	3.19112	8.40551	0
EBPR > Vermont	Actinobacteriota	Genus:Spirillospora	2.05282	1.79309	2.1641e-05
EBPR > Vermont	Proteobacteria	Genus:Nevskia	2.14542	7.73361	0.00128408
EBPR > Vermont	Bacteroidota	Genus:Flavipsychrobacter	1.58886	6.55409	0.00369545
EBPR > Vermont	Chloroflexota	Genus:GWC2-73-18	1.62809	8.28946	0.00469094
EBPR > Vermont	Proteobacteria	Genus:Parvibaculum	1.60104	6.7426	0.00448149
EBPR > Vermont	Proteobacteria	Genus:Dyella	1.07893	0.832532	0.0135392
EBPR > Vermont	Proteobacteria	Genus:Methylovorus	1.55803	3.28242	2.04239e-06
EBPR > Vermont	Bacteroidota	Genus:Mucilaginibacter	1.13653	1.56768	0.00349503
EBPR > Vermont	Proteobacteria	Family:Rhodanobacteraceae	1.85372	1.29553	2.36843e-05
EBPR > Vermont	Proteobacteria	Family:Micropepsaceae	1.03383	0.747737	0.0117057
EBPR > Vermont	Myxococcota	Genus:SLQV01	1.32751	6.16377	0.01212
EBPR > Vermont	Proteobacteria	Genus:Bordetella	1.02006	0.863347	0.0165845
EBPR > Vermont_AMF	Proteobacteria	Family:Usitatibacteraceae	2.15463	10.7065	0.00153626
EBPR > Vermont_AMF	Proteobacteria	Genus:Devosia	3.05053	3.19321	5.02728e-07
EBPR > Vermont_AMF	Firmicutes	Class:Bacilli	4.22694	4.66112	0
EBPR > Vermont_AMF	Actinobacteriota	Genus:Streptomyces	3.3859	3.62794	0
EBPR > Vermont_AMF	Proteobacteria	Family:Xanthomonadaceae	3.01715	2.49935	1.0683e-06
EBPR > Vermont_AMF	Bacteroidota	Genus:Niastella	1.85055	3.12094	0.00327054
EBPR > Vermont_AMF	Acidobacteriota	Genus:SCN-69-37	2.05093	10.711	0.0017572
EBPR > Vermont_AMF	Firmicutes	Genus:Bacillus	3.6187	4.39499	0
EBPR > Vermont_AMF	Actinobacteriota	Family:Streptomycetaceae	3.00514	5.39771	0
EBPR > Vermont_AMF	Planctomycetota	Genus:Gemmata	0.717562	2.73564	0.0325681
EBPR > Vermont_AMF	Proteobacteria	Genus:Pseudomonas	1.45029	5.73245	0.00233769
EBPR > Vermont_AMF	Bacteroidota	Genus:Chryseolinea	1.71604	10.538	0.0031896
EBPR > Vermont_AMF	Proteobacteria	Family:Labraceae	1.80889	2.81235	0.00294566
EBPR > Vermont_AMF	Proteobacteria	Genus:Solimonas	1.61884	5.26284	0.00384859
EBPR > Vermont_AMF	Proteobacteria	Genus:Bradyrhizobium	1.12038	2.41817	0.0479242
EBPR > Vermont_AMF	Proteobacteria	Genus:Massilia	0.971255	1.94509	0.0143587
EBPR > Vermont_AMF	Firmicutes	Genus:Neobacillus	3.63524	4.20314	0
EBPR > Vermont_AMF	Myxococcota	Family:Polyangiaceae	2.64023	11.7954	0.000388338
EBPR > Vermont_AMF	Proteobacteria	Genus:Frateuria	3.28943	2.57181	0
EBPR > Vermont_AMF	Proteobacteria	Genus:Cavicella	1.07	4.89354	0.0022013
EBPR > Vermont_AMF	Bacteroidota	Genus:SB25	0.911531	3.56728	0.00762855
EBPR > Vermont_AMF	Bdellovibrionota	Genus:Peredibacter	0.884483	3.86837	0.0188338
EBPR > Vermont_AMF	Firmicutes	Genus:Pullulanibacillus	3.07177	4.86011	0
EBPR > Vermont_AMF	Verrucomicrobiota	Genus:Prosthecobacter	1.67235	9.10623	0.0037759
EBPR > Vermont_AMF	Kingdom:Bacteria	Kingdom:Bacteria	0.984794	3.43675	0.00924475
EBPR > Vermont_AMF	Proteobacteria	Genus:Novosphingobium	0.693662	3.34056	0.0228417
EBPR > Vermont_AMF	Bacteroidota	Genus:Arachidicoccus	1.29769	2.38908	0.00164948
EBPR > Vermont_AMF	Actinobacteriota	Genus:Spirillospora	2.95292	3.11691	0
EBPR > Vermont_AMF	Proteobacteria	Genus:Ramlibacter	4.01735	2.83444	0
EBPR > Vermont_AMF	Bacteroidota	Genus:Edaphocola	0.820783	2.86747	0.032355
EBPR > Vermont_AMF	Proteobacteria	Genus:Rhizobium	2.45376	2.45672	2.8458e-06
EBPR > Vermont_AMF	Proteobacteria	Family:Burkholderiaceae	1.07639	2.08861	0.00310365
EBPR > Vermont_AMF	Proteobacteria	Genus:Rhodanobacter	1.41234	1.62738	0.00238686
EBPR > Vermont_AMF	Planctomycetota	Family:Pirellulaceae	1.05868	1.88816	0.00608258
EBPR > Vermont_AMF	Proteobacteria	Genus:Noviherbaspirillum	0.535051	3.18383	0.0239692
EBPR > Vermont_AMF	Proteobacteria	Genus:Dyella	1.67895	2.02045	0.00102317
EBPR > Vermont_AMF	Firmicutes	Genus:Alicyclobacillus	3.46415	4.54154	0
EBPR > Vermont_AMF	Bacteroidota	Genus:Chitinophaga	2.56893	2.79437	0.00191083
EBPR > Vermont_AMF	Bacteroidota	Genus:Mucilaginibacter	2.37575	2.98362	0.000118138
EBPR > Vermont_AMF	Proteobacteria	Family:Rhodanobacteraceae	3.51435	3.34182	0
EBPR > Vermont_AMF	Proteobacteria	Family:Micropepsaceae	2.31487	2.75989	0.00363131
EBPR_AMF > AMF	Proteobacteria	Family:Moraxellaceae	-1.81856	-4.2934	0.000149644
EBPR_AMF > AMF	Verrucomicrobiota	Genus:DSWX01	-2.88345	-7.65959	0.000149644
EBPR_AMF > AMF	Planctomycetota	Genus:Tundrisphaera	-1.45987	-5.88675	0.00605716
EBPR_AMF > AMF	Proteobacteria	Genus:Afipia	-1.17367	-6.1491	0.0317285
EBPR_AMF > AMF	Myxococcota	Genus:REDI01	-1.50801	-6.49966	0.00666615
EBPR_AMF > AMF	Bacteroidota	Genus:Dyadobacter	-1.88481	-6.83084	0.00147853
EBPR_AMF > AMF	Firmicutes	Class:Bacilli	-0.866275	-1.4938	0.0439401
EBPR_AMF > AMF	Planctomycetota	Genus:Planctopirus	-1.81618	-2.03177	0.000162493
EBPR_AMF > AMF	Proteobacteria	Family:Xanthomonadaceae	-2.88093	-2.09193	0.000149644
EBPR_AMF > AMF	Firmicutes	Genus:Bacillus	-0.850853	-1.14373	0.0390989
EBPR_AMF > AMF	Planctomycetota	Genus:Gemmata	-1.3996	-1.91843	0.00182583
EBPR_AMF > AMF	Proteobacteria	Genus:Pseudomonas	-4.15883	-3.82817	0.000149644
EBPR_AMF > AMF	Gemmatimonadota	Family:Gemmatimonadaceae	-1.62353	-7.28668	0.00559391
EBPR_AMF > AMF	Planctomycetota	Genus:Pirellula	-1.2673	-1.4512	0.00649772
EBPR_AMF > AMF	Proteobacteria	Family:Labraceae	-1.35928	-0.943115	0.00533346
EBPR_AMF > AMF	Proteobacteria	Genus:Solimonas	-1.83835	-3.25508	0.00045843
EBPR_AMF > AMF	Firmicutes	Genus:Neobacillus	-1.7069	-1.82617	0.000203799
EBPR_AMF > AMF	Myxococcota	Family:Polyangiaceae	-1.17421	-6.22885	0.0194843
EBPR_AMF > AMF	Planctomycetota	Genus:Caulifigura	-1.03767	-1.53245	0.00206136
EBPR_AMF > AMF	Proteobacteria	Genus:Asprobacter	-1.55902	-7.3273	0.0105842
EBPR_AMF > AMF	Actinobacteriota	Family:Microbacteriaceae	-3.20213	-8.25126	0.000149644
EBPR_AMF > AMF	Planctomycetota	Genus:Planctomyces	-2.01122	-8.05705	0.00134777
EBPR_AMF > AMF	Cyanobacteria	Class:Vampirovibrionia	-1.0421	-5.3627	0.024959
EBPR_AMF > AMF	Kingdom:Bacteria	Kingdom:Bacteria	-1.46092	-1.83953	0.00240765
EBPR_AMF > AMF	Proteobacteria	Genus:Novosphingobium	-1.71748	-1.94159	0.00049495
EBPR_AMF > AMF	Bacteroidota	Genus:Arachidicoccus	-1.93705	-8.13888	0.00170573
EBPR_AMF > AMF	Chloroflexota	Class:Limnocylindria	-1.05284	-5.43049	0.0261169
EBPR_AMF > AMF	Proteobacteria	Class:Alphaproteobacteria	-1.55979	-6.88989	0.00746147
EBPR_AMF > AMF	Proteobacteria	Genus:Ramlibacter	-0.909939	-0.797053	0.0371386
EBPR_AMF > AMF	Acidobacteriota	Family:UBA5704	-1.41302	-6.80334	0.00645161
EBPR_AMF > AMF	Gemmatimonadota	Genus:Gemmatimonas	-2.12612	-7.67616	0.0013163
EBPR_AMF > AMF	Acidobacteriota	Genus:WHSN01	-0.528676	-1.77908	0.038863
EBPR_AMF > AMF	Proteobacteria	Genus:Rhodopila	-3.05951	-7.51445	0.000149644
EBPR_AMF > AMF	Proteobacteria	Genus:Noviherbaspirillum	-1.67575	-9.85538	0.00863739
EBPR_AMF > AMF	Gemmatimonadota	Genus:Longimicrobium	-1.21428	-6.3943	0.0266354
EBPR_AMF > AMF	Proteobacteria	Genus:Parvibaculum	-1.42735	-7.1991	0.0106606
EBPR_AMF > AMF	Planctomycetota	Genus:UBA10511	-1.23594	-6.05578	0.0258223
EBPR_AMF > AMF	Bacteroidota	Family:Sphingobacteriaceae	-1.55164	-6.77913	0.005132
EBPR_AMF > AMF	Proteobacteria	Genus:Luteimonas	-1.2967	-6.85802	0.0169339
EBPR_AMF > AMF	Bacteroidota	Genus:Ohtaekwangia	-1.21733	-6.87376	0.0245927
EBPR_AMF > AMF	Proteobacteria	Genus:Methylovorus	-1.45803	-2.23248	0.000335923
EBPR_AMF > AMF	Proteobacteria	Genus:UBA5216	-1.17025	-6.56711	0.0234001
EBPR_AMF > AMF	Cyanobacteria	Genus:GCA-2770975	-1.13024	-2.18979	0.00188418
EBPR_AMF > AMF	Bacteroidota	Genus:Pararcticibacter	-1.07986	-6.24757	0.0358504
EBPR_AMF > AMF	Proteobacteria	Family:Rhodanobacteraceae	-1.40884	-1.64268	0.00247372
EBPR_AMF > AMF	Bacteroidota	Genus:Ginsengibacter	-1.23316	-6.88823	0.0244893
EBPR_AMF > AMF	Verrucomicrobiota	Genus:Pedosphaera	-0.763943	-1.72558	0.00556192
EBPR_AMF > Control	Proteobacteria	Family:Moraxellaceae	-1.64237	-4.14068	5.0634e-05
EBPR_AMF > Control	Bacteroidota	Genus:Dyadobacter	-2.43361	-8.49395	0.000607224
EBPR_AMF > Control	Firmicutes	Class:Bacilli	-1.55416	-2.58566	0.00212403
EBPR_AMF > Control	Actinobacteriota	Genus:Nocardioides	-1.01394	-1.33008	0.0197927
EBPR_AMF > Control	Actinobacteriota	Genus:Streptomyces	-2.19267	-2.69341	5.03386e-05
EBPR_AMF > Control	Proteobacteria	Family:Xanthomonadaceae	-3.42832	-3.03392	5.03386e-05
EBPR_AMF > Control	Firmicutes	Genus:Bacillus	-2.63556	-2.85302	5.03386e-05
EBPR_AMF > Control	Actinobacteriota	Family:Streptomycetaceae	-2.43012	-3.93483	0.000125149
EBPR_AMF > Control	Planctomycetota	Genus:Gemmata	-0.701635	-1.13535	0.0232284
EBPR_AMF > Control	Proteobacteria	Genus:Pseudomonas	-2.82016	-5.35804	5.06526e-05
EBPR_AMF > Control	Proteobacteria	Genus:Sphingomonas	-1.18123	-1.51829	0.0076811
EBPR_AMF > Control	Proteobacteria	Family:Labraceae	-2.80359	-2.18832	5.23295e-05
EBPR_AMF > Control	Proteobacteria	Genus:Solimonas	-2.112	-3.51006	5.08696e-05
EBPR_AMF > Control	Proteobacteria	Genus:Massilia	-2.91445	-4.14199	5.03386e-05
EBPR_AMF > Control	Firmicutes	Genus:Neobacillus	-3.76145	-4.03638	5.15927e-05
EBPR_AMF > Control	Proteobacteria	Genus:Frateuria	-1.54734	-1.77563	0.00121549
EBPR_AMF > Control	Proteobacteria	Genus:Cavicella	-0.756222	-2.19504	0.00319021
EBPR_AMF > Control	Bacteroidota	Genus:JC017	-2.50429	-5.67329	5.03386e-05
EBPR_AMF > Control	Planctomycetota	Genus:Planctomyces	-2.52412	-9.28601	5.36041e-05
EBPR_AMF > Control	Firmicutes	Genus:Pullulanibacillus	-2.24462	-3.58565	6.12062e-05
EBPR_AMF > Control	Proteobacteria	Genus:Pandoraea	-1.21596	-3.0414	0.00443682
EBPR_AMF > Control	Proteobacteria	Family:Enterobacteriaceae	-1.85891	-2.54084	0.000552887
EBPR_AMF > Control	Kingdom:Bacteria	Kingdom:Bacteria	-2.73845	-3.82159	5.03386e-05
EBPR_AMF > Control	Proteobacteria	Genus:Novosphingobium	-3.09	-2.90993	5.03386e-05
EBPR_AMF > Control	Bacteroidota	Genus:Arachidicoccus	-1.90427	-10.4432	0.00265993
EBPR_AMF > Control	Proteobacteria	Genus:Pusillimonas	-1.89689	-8.90409	0.00325811
EBPR_AMF > Control	Proteobacteria	Class:Alphaproteobacteria	-3.17985	-8.95272	5.03386e-05
EBPR_AMF > Control	Proteobacteria	Genus:Ramlibacter	-3.27661	-2.31606	5.32335e-05
EBPR_AMF > Control	Proteobacteria	Genus:Legionella	-1.82974	-7.8296	0.00185219
EBPR_AMF > Control	Proteobacteria	Genus:Paraburkholderia	-1.34597	-1.66976	0.00998845
EBPR_AMF > Control	Proteobacteria	Family:Burkholderiaceae	-0.709766	-1.53032	0.00858899
EBPR_AMF > Control	Planctomycetota	Family:Isosphaeraceae	-1.14227	-2.6687	0.0035278
EBPR_AMF > Control	Bacteroidota	Genus:Pelobium	-1.4355	-7.26991	0.0103491
EBPR_AMF > Control	Proteobacteria	Genus:Rhodopila	-1.49199	-7.48906	0.00609495
EBPR_AMF > Control	Proteobacteria	Genus:Acinetobacter	-1.90169	-9.15869	0.00299222
EBPR_AMF > Control	Proteobacteria	Genus:Nevskia	-3.3102	-9.50132	5.03386e-05
EBPR_AMF > Control	Proteobacteria	Genus:Dyella	-3.39658	-3.01919	5.03386e-05
EBPR_AMF > Control	Planctomycetota	Genus:UBA10511	-2.29667	-9.1214	0.000654144
EBPR_AMF > Control	Proteobacteria	Genus:Methylovorus	-1.87726	-2.72881	7.42052e-05
EBPR_AMF > Control	Cyanobacteria	Genus:GCA-2770975	-1.6749	-2.80074	6.95645e-05
EBPR_AMF > Control	Firmicutes	Genus:Alicyclobacillus	-1.76564	-4.28259	0.00796546
EBPR_AMF > Control	Bacteroidota	Genus:Mucilaginibacter	-2.1207	-2.17258	7.712e-05
EBPR_AMF > Control	Proteobacteria	Family:Rhodanobacteraceae	-3.74333	-3.52147	5.03386e-05
EBPR_AMF > Control	Proteobacteria	Family:Micropepsaceae	-1.93406	-1.43087	0.00014347
EBPR_AMF > Control	Proteobacteria	Genus:Bordetella	-1.70318	-2.61707	5.6894e-05
EBPR_AMF > EBPR	Chloroflexota	Genus:Kouleothrix	-1.198	-5.65985	0.0213487
EBPR_AMF > EBPR	Proteobacteria	Genus:Stenotrophobium	-1.31664	-1.56518	0.00607285
EBPR_AMF > EBPR	Proteobacteria	Genus:Afipia	-2.59991	-6.939	0.000261854
EBPR_AMF > EBPR	Proteobacteria	Genus:Thauera	-1.98226	-7.5329	0.00338732
EBPR_AMF > EBPR	Actinobacteriota	Genus:Nocardioides	-1.20203	-1.30063	0.0249701
EBPR_AMF > EBPR	Proteobacteria	Family:Xanthomonadaceae	-1.25906	-0.996988	0.0102558
EBPR_AMF > EBPR	Proteobacteria	Genus:Massilia	-1.11899	-1.13888	0.016941
EBPR_AMF > EBPR	Actinobacteriota	Family:Microbacteriaceae	-1.29426	-6.49845	0.0199773
EBPR_AMF > EBPR	Planctomycetota	Genus:Planctomyces	-2.21377	-6.17718	0.00027108
EBPR_AMF > EBPR	Firmicutes	Genus:Priestia	-1.51313	-6.87754	0.0189181
EBPR_AMF > EBPR	Planctomycetota	Genus:Paludisphaera	-0.725752	-1.4048	0.0475375
EBPR_AMF > EBPR	Bacteroidota	Genus:Arachidicoccus	-2.89368	-8.15717	0.000261854
EBPR_AMF > EBPR	Bacteroidota	Genus:Edaphocola	-1.83961	-6.62652	0.00372337
EBPR_AMF > EBPR	Bacteroidota	Genus:Haoranjiania	-2.37744	-6.68408	0.000263196
EBPR_AMF > EBPR	Chloroflexota	Order:Thermomicrobiales	-1.37126	-6.80617	0.0210608
EBPR_AMF > EBPR	Proteobacteria	Genus:Noviherbaspirillum	-1.48596	-8.02333	0.0207582
EBPR_AMF > EBPR	Bacteroidota	Genus:OLB8	-1.7688	-6.21293	0.000409383
EBPR_AMF > EBPR	Proteobacteria	Genus:Sphingopyxis	-1.90709	-6.68174	0.00340605
EBPR_AMF > Vermont	Proteobacteria	Family:Devosiaceae	1.24595	7.18827	0.0265925
EBPR_AMF > Vermont	Proteobacteria	Family:Moraxellaceae	1.14782	2.88962	0.000399856
EBPR_AMF > Vermont	Proteobacteria	Family:Usitatibacteraceae	3.22711	8.80206	9.70378e-05
EBPR_AMF > Vermont	Bacteroidota	Genus:Dyadobacter	2.04694	7.59829	0.00156173
EBPR_AMF > Vermont	Actinobacteriota	Genus:Streptomyces	1.14244	0.871126	0.0100429
EBPR_AMF > Vermont	Proteobacteria	Family:Xanthomonadaceae	0.749068	0.906447	0.0322128
EBPR_AMF > Vermont	Acidobacteriota	Genus:SCN-69-37	3.27167	8.70521	9.70378e-05
EBPR_AMF > Vermont	Actinobacteriota	Family:Streptomycetaceae	4.93044	4.10665	9.70378e-05
EBPR_AMF > Vermont	Proteobacteria	Genus:Pseudomonas	3.50955	3.22742	9.70378e-05
EBPR_AMF > Vermont	Bacteroidota	Genus:Chryseolinea	2.48212	8.50652	0.000996903
EBPR_AMF > Vermont	Proteobacteria	Family:Methylophilaceae	3.39144	9.9966	9.70378e-05
EBPR_AMF > Vermont	Proteobacteria	Genus:Solimonas	1.90663	2.29063	0.000305636
EBPR_AMF > Vermont	Armatimonadota	Genus:Fimbriimonas	1.41042	6.36042	0.00993291
EBPR_AMF > Vermont	Myxococcota	Family:Polyangiaceae	1.691	7.88244	0.00586677
EBPR_AMF > Vermont	Actinobacteriota	Family:Micrococcaceae	2.09757	6.97626	0.00167942
EBPR_AMF > Vermont	Actinobacteriota	Genus:Actinocatenispora	3.33247	9.14329	9.70378e-05
EBPR_AMF > Vermont	Actinobacteriota	Genus:Baekduia	2.06473	7.09045	0.00131916
EBPR_AMF > Vermont	Verrucomicrobiota	Genus:Prosthecobacter	3.28362	8.54972	9.70378e-05
EBPR_AMF > Vermont	Proteobacteria	Genus:Pandoraea	0.802799	1.37925	0.0206225
EBPR_AMF > Vermont	Bacteroidota	Genus:Arachidicoccus	1.9355	6.95296	0.000828078
EBPR_AMF > Vermont	Actinobacteriota	Genus:Actinospica	3.80377	9.6008	9.70378e-05
EBPR_AMF > Vermont	Proteobacteria	Family:Nevskiaceae	1.6397	7.11853	0.00533442
EBPR_AMF > Vermont	Proteobacteria	Genus:Pusillimonas	3.11437	8.46976	9.70378e-05
EBPR_AMF > Vermont	Proteobacteria	Class:Alphaproteobacteria	1.34459	6.35654	0.0144862
EBPR_AMF > Vermont	Proteobacteria	Genus:Candidimonas	1.59388	6.44752	0.00595968
EBPR_AMF > Vermont	Actinobacteriota	Genus:VAYN01	3.05561	8.07522	9.70378e-05
EBPR_AMF > Vermont	Bacteroidota	Genus:Haoranjiania	2.87764	7.7935	9.74786e-05
EBPR_AMF > Vermont	Chloroflexota	Order:Thermomicrobiales	1.43776	6.09607	0.00875707
EBPR_AMF > Vermont	Proteobacteria	Genus:Nevskia	1.92957	7.5718	0.00218932
EBPR_AMF > Vermont	Bacteroidota	Genus:Flavipsychrobacter	1.54327	6.3303	0.00491075
EBPR_AMF > Vermont	Proteobacteria	Genus:Noviherbaspirillum	2.5467	9.11746	0.00081278
EBPR_AMF > Vermont	Chloroflexota	Genus:GWC2-73-18	1.6223	7.8203	0.00699409
EBPR_AMF > Vermont	Proteobacteria	Genus:Parvibaculum	1.49642	6.33042	0.00708485
EBPR_AMF > Vermont	Proteobacteria	Genus:Dyella	1.22961	0.988722	0.00272961
EBPR_AMF > Vermont	Planctomycetota	Genus:UBA10511	1.4528	6.85426	0.00946451
EBPR_AMF > Vermont	Proteobacteria	Genus:Methylovorus	1.62977	2.33698	0.000145706
EBPR_AMF > Vermont	Bacteroidota	Genus:Mucilaginibacter	0.936931	1.41474	0.0157348
EBPR_AMF > Vermont	Proteobacteria	Family:Rhodanobacteraceae	1.98601	1.61178	0.000154286
EBPR_AMF > Vermont	Myxococcota	Genus:SLQV01	1.26504	5.88347	0.0213784
EBPR_AMF > Vermont_AMF	Proteobacteria	Family:Usitatibacteraceae	2.0534	10.3997	0.00190671
EBPR_AMF > Vermont_AMF	Proteobacteria	Genus:Afipia	1.69144	8.89294	0.00403177
EBPR_AMF > Vermont_AMF	Proteobacteria	Genus:Devosia	2.67151	2.70848	0
EBPR_AMF > Vermont_AMF	Firmicutes	Class:Bacilli	4.44848	4.20121	0
EBPR_AMF > Vermont_AMF	Actinobacteriota	Genus:Streptomyces	3.70397	3.50272	0
EBPR_AMF > Vermont_AMF	Proteobacteria	Family:Xanthomonadaceae	3.96874	3.34861	0
EBPR_AMF > Vermont_AMF	Acidobacteriota	Genus:SCN-69-37	2.02482	10.3329	0.00163469
EBPR_AMF > Vermont_AMF	Firmicutes	Genus:Bacillus	3.65291	3.72454	0
EBPR_AMF > Vermont_AMF	Actinobacteriota	Family:Streptomycetaceae	2.43922	4.50621	0
EBPR_AMF > Vermont_AMF	Proteobacteria	Genus:Pseudomonas	1.60198	4.75252	0.00331832
EBPR_AMF > Vermont_AMF	Bacteroidota	Genus:Chryseolinea	1.69307	10.105	0.00616413
EBPR_AMF > Vermont_AMF	Proteobacteria	Family:Labraceae	2.89736	2.58181	0.00393746
EBPR_AMF > Vermont_AMF	Proteobacteria	Genus:Solimonas	1.26652	4.35518	0.0125486
EBPR_AMF > Vermont_AMF	Proteobacteria	Genus:Bradyrhizobium	0.683526	2.68494	0.039977
EBPR_AMF > Vermont_AMF	Proteobacteria	Genus:Massilia	1.57526	2.88317	0.00424508
EBPR_AMF > Vermont_AMF	Firmicutes	Genus:Neobacillus	3.72449	4.27526	0
EBPR_AMF > Vermont_AMF	Myxococcota	Family:Polyangiaceae	2.48781	11.2702	0.00037262
EBPR_AMF > Vermont_AMF	Proteobacteria	Genus:Frateuria	2.15516	2.12512	5.31921e-05
EBPR_AMF > Vermont_AMF	Proteobacteria	Genus:Cavicella	0.636502	2.59055	0.0304962
EBPR_AMF > Vermont_AMF	Bacteroidota	Genus:SB25	1.47443	2.90891	9.58722e-05
EBPR_AMF > Vermont_AMF	Firmicutes	Genus:Pullulanibacillus	2.7975	4.27555	0
EBPR_AMF > Vermont_AMF	Verrucomicrobiota	Genus:Prosthecobacter	1.58856	8.61897	0.0079356
EBPR_AMF > Vermont_AMF	Kingdom:Bacteria	Kingdom:Bacteria	1.1905	2.44627	0.0218355
EBPR_AMF > Vermont_AMF	Proteobacteria	Genus:Novosphingobium	1.17638	2.89754	0.0485256
EBPR_AMF > Vermont_AMF	Bacteroidota	Genus:Arachidicoccus	3.14041	10.7109	0
EBPR_AMF > Vermont_AMF	Actinobacteriota	Genus:Spirillospora	1.63013	2.0915	0.000181165
EBPR_AMF > Vermont_AMF	Proteobacteria	Genus:Ramlibacter	3.62623	2.63011	0
EBPR_AMF > Vermont_AMF	Bacteroidota	Genus:Edaphocola	1.9816	9.22558	0.00268682
EBPR_AMF > Vermont_AMF	Proteobacteria	Genus:Rhizobium	2.38138	2.06087	4.57794e-05
EBPR_AMF > Vermont_AMF	Planctomycetota	Family:Pirellulaceae	0.892853	1.62963	0.00965863
EBPR_AMF > Vermont_AMF	Proteobacteria	Genus:Noviherbaspirillum	2.15431	11.0781	0.00203643
EBPR_AMF > Vermont_AMF	Proteobacteria	Genus:Dyella	1.69276	2.03907	0.00108148
EBPR_AMF > Vermont_AMF	Firmicutes	Genus:Alicyclobacillus	2.36634	4.36142	0
EBPR_AMF > Vermont_AMF	Bacteroidota	Genus:Chitinophaga	1.01178	1.49245	0.0227734
EBPR_AMF > Vermont_AMF	Bacteroidota	Genus:Mucilaginibacter	2.06038	2.72099	0.00032881
EBPR_AMF > Vermont_AMF	Proteobacteria	Family:Rhodanobacteraceae	3.19003	3.4534	9.21824e-07
EBPR_AMF > Vermont_AMF	Proteobacteria	Family:Micropepsaceae	1.33951	1.73234	0.00821259
Vermont > AMF	Myxococcota	Family:Myxococcaceae	-1.07826	-5.39672	0.0254692
Vermont > AMF	Proteobacteria	Family:Moraxellaceae	-1.35191	-1.43871	0.00329064
Vermont > AMF	Verrucomicrobiota	Genus:DSWX01	-2.57363	-7.30961	3.55198e-06
Vermont > AMF	Planctomycetota	Genus:Tundrisphaera	-1.36215	-5.3978	0.0095406
Vermont > AMF	Proteobacteria	Genus:Afipia	-1.04551	-5.64614	0.032762
Vermont > AMF	Gemmatimonadota	Genus:Roseisolibacter	-1.14131	-6.45936	0.0268024
Vermont > AMF	Myxococcota	Genus:REDI01	-1.3175	-5.91927	0.00895785
Vermont > AMF	Planctomycetota	Genus:Planctopirus	-3.32429	-8.7531	0
Vermont > AMF	Proteobacteria	Family:Xanthomonadaceae	-1.03998	-1.15734	0.00579013
Vermont > AMF	Planctomycetota	Genus:Gemmata	-1.18018	-2.16914	0.00265551
Vermont > AMF	Gemmatimonadota	Family:Gemmatimonadaceae	-1.41371	-6.75026	0.00720663
Vermont > AMF	Proteobacteria	Genus:Sphingomonas	-0.906601	-0.819186	0.0330686
Vermont > AMF	Planctomycetota	Genus:Pirellula	-1.13814	-1.48168	0.00848808
Vermont > AMF	Firmicutes	Genus:Neobacillus	-1.09253	-1.60244	0.00670605
Vermont > AMF	Proteobacteria	Genus:Phenylobacterium	-0.70572	-1.64769	0.00407609
Vermont > AMF	Proteobacteria	Genus:Asprobacter	-1.3123	-6.84238	0.0100611
Vermont > AMF	Actinobacteriota	Family:Microbacteriaceae	-2.83173	-7.90625	1.26857e-06
Vermont > AMF	Planctomycetota	Genus:Planctomyces	-1.87415	-7.24972	0.00171136
Vermont > AMF	Cyanobacteria	Class:Vampirovibrionia	-0.951788	-4.82047	0.0358309
Vermont > AMF	Planctomycetota	Genus:Paludisphaera	-2.96088	-8.26221	2.25523e-06
Vermont > AMF	Proteobacteria	Genus:Novosphingobium	-1.47862	-1.59891	0.00108266
Vermont > AMF	Planctomycetota	Genus:UBA2421	-1.044	-5.49842	0.0316101
Vermont > AMF	Chloroflexota	Class:Limnocylindria	-0.97054	-4.9153	0.0338354
Vermont > AMF	Proteobacteria	Genus:Ramlibacter	-0.975279	-0.914104	0.0244337
Vermont > AMF	Acidobacteriota	Family:UBA5704	-1.38143	-5.99622	0.011096
Vermont > AMF	Gemmatimonadota	Genus:Gemmatimonas	-1.92188	-7.13843	0.00130987
Vermont > AMF	Acidobacteriota	Genus:WHSN01	-2.1919	-7.81252	0.00130591
Vermont > AMF	Proteobacteria	Genus:Rhodopila	-2.46102	-6.8308	3.52379e-06
Vermont > AMF	Gemmatimonadota	Genus:Longimicrobium	-1.15418	-5.92118	0.0226913
Vermont > AMF	Bacteroidota	Family:Sphingobacteriaceae	-1.44028	-6.22163	0.00623406
Vermont > AMF	Proteobacteria	Genus:Luteimonas	-1.16258	-6.2875	0.0256537
Vermont > AMF	Bacteroidota	Genus:Ohtaekwangia	-1.17461	-6.28279	0.0231572
Vermont > AMF	Proteobacteria	Genus:UBA5216	-1.14931	-6.17756	0.0293614
Vermont > AMF	Cyanobacteria	Genus:GCA-2770975	-2.60979	-7.89043	4.53864e-06
Vermont > AMF	Bacteroidota	Genus:Chitinophaga	-1.54758	-1.40751	0.00134461
Vermont > AMF	Bacteroidota	Genus:Pararcticibacter	-1.00167	-5.76954	0.0367876
Vermont > AMF	Bacteroidota	Genus:Ginsengibacter	-1.11775	-6.49118	0.0219939
Vermont > AMF	Proteobacteria	Genus:Asticcacaulis	-0.785118	-1.16804	0.0287355
Vermont > AMF	Verrucomicrobiota	Genus:Pedosphaera	-2.96163	-7.77589	0
Vermont > Control	Proteobacteria	Family:Moraxellaceae	-1.36149	-1.41861	0.00407879
Vermont > Control	Firmicutes	Class:Bacilli	-1.10162	-2.1516	0.00972617
Vermont > Control	Actinobacteriota	Genus:Nocardioides	-2.85873	-3.74639	0.000104667
Vermont > Control	Actinobacteriota	Genus:Streptomyces	-1.46057	-2.02567	0.00183069
Vermont > Control	Proteobacteria	Family:Xanthomonadaceae	-2.00791	-2.28918	0.000951271
Vermont > Control	Bacteroidota	Genus:Niastella	-0.834768	-1.09206	0.0228277
Vermont > Control	Firmicutes	Genus:Bacillus	-1.6099	-2.1736	0.000954524
Vermont > Control	Planctomycetota	Genus:Gemmata	-0.684358	-1.61617	0.0182478
Vermont > Control	Proteobacteria	Genus:Pseudomonas	-1.24321	-2.17304	0.0256816
Vermont > Control	Proteobacteria	Genus:Sphingomonas	-2.44123	-2.9452	0.000136707
Vermont > Control	Proteobacteria	Family:Labraceae	-2.00497	-1.88229	0.000230747
Vermont > Control	Proteobacteria	Genus:Solimonas	-0.791839	-1.32436	0.0179442
Vermont > Control	Proteobacteria	Genus:Massilia	-1.83795	-3.57629	0.000444277
Vermont > Control	Firmicutes	Genus:Neobacillus	-1.94342	-3.86824	0.000418418
Vermont > Control	Proteobacteria	Genus:Frateuria	-1.30985	-1.61886	0.0038059
Vermont > Control	Proteobacteria	Genus:Cavicella	-1.13739	-2.44242	0.000238772
Vermont > Control	Bacteroidota	Genus:JC017	-3.30383	-9.50227	0.000104466
Vermont > Control	Planctomycetota	Genus:Planctomyces	-2.45091	-8.68291	0.000118068
Vermont > Control	Planctomycetota	Genus:Paludisphaera	-2.817	-8.65425	0.000104466
Vermont > Control	Firmicutes	Genus:Pullulanibacillus	-2.06119	-3.20318	0.000311674
Vermont > Control	Proteobacteria	Family:Enterobacteriaceae	-1.97739	-4.65913	0.000114689
Vermont > Control	Kingdom:Bacteria	Kingdom:Bacteria	-1.76747	-3.16629	0.000129892
Vermont > Control	Proteobacteria	Genus:Novosphingobium	-3.25444	-2.78028	0.000105157
Vermont > Control	Bacteroidota	Genus:Arachidicoccus	-1.04463	-3.70751	0.0407462
Vermont > Control	Planctomycetota	Genus:Urbifossiella	-0.946286	-1.97098	0.0107997
Vermont > Control	Proteobacteria	Class:Alphaproteobacteria	-1.04977	-2.35282	0.000657674
Vermont > Control	Proteobacteria	Genus:Ramlibacter	-3.3459	-2.57269	0.000122493
Vermont > Control	Proteobacteria	Genus:Legionella	-1.73278	-7.4664	0.0033805
Vermont > Control	Proteobacteria	Genus:Paraburkholderia	-1.59851	-3.70952	0.000186879
Vermont > Control	Proteobacteria	Family:Burkholderiaceae	-0.783716	-1.79828	0.0043239
Vermont > Control	Firmicutes	Genus:Cohnella	-0.706412	-3.22519	0.0237797
Vermont > Control	Planctomycetota	Family:Isosphaeraceae	-0.953674	-2.28588	0.00276359
Vermont > Control	Bacteroidota	Genus:Pelobium	-1.32199	-6.81655	0.00931717
Vermont > Control	Proteobacteria	Genus:Rhodopila	-1.39697	-6.87145	0.00856883
Vermont > Control	Proteobacteria	Genus:Acinetobacter	-1.76763	-8.54785	0.00292462
Vermont > Control	Proteobacteria	Genus:Nevskia	-0.923735	-2.22314	0.00831274
Vermont > Control	Proteobacteria	Genus:Dyella	-2.06686	-2.09442	0.000217354
Vermont > Control	Cyanobacteria	Genus:GCA-2770975	-3.16823	-8.62911	0.000104466
Vermont > Control	Firmicutes	Genus:Alicyclobacillus	-1.15785	-4.96285	0.00338739
Vermont > Control	Proteobacteria	Genus:Mesorhizobium	-0.48395	-1.6974	0.0464449
Vermont > Control	Bacteroidota	Genus:Chitinophaga	-2.24558	-2.13527	0.000156522
Vermont > Control	Proteobacteria	Family:Rhodanobacteraceae	-1.65981	-1.99952	0.000608157
Vermont > Control	Proteobacteria	Family:Micropepsaceae	-1.75933	-1.63834	0.000805453
Vermont > Control	Proteobacteria	Genus:Asticcacaulis	-1.31742	-2.48374	0.00157418
Vermont > Control	Proteobacteria	Genus:Bordetella	-2.03186	-1.73855	0.000301698
Vermont > EBPR	Proteobacteria	Genus:Aromatoleum	-2.60482	-8.6947	9.08623e-05
Vermont > EBPR	Chloroflexota	Genus:Kouleothrix	-1.08226	-5.05734	0.0192002
Vermont > EBPR	Myxococcota	Family:Myxococcaceae	-2.80254	-7.06315	9.55635e-05
Vermont > EBPR	Bacteroidota	Family:Chitinophagaceae	-2.47224	-6.85627	9.39492e-05
Vermont > EBPR	Bacteroidota	Genus:OLB10	-1.13263	-5.57161	0.0151106
Vermont > EBPR	Proteobacteria	Genus:Afipia	-2.34774	-6.43035	9.36531e-05
Vermont > EBPR	Gemmatimonadota	Genus:Roseisolibacter	-1.54047	-5.68842	0.00248559
Vermont > EBPR	Proteobacteria	Genus:Paracoccus	-1.27887	-7.07792	0.0123767
Vermont > EBPR	Actinobacteriota	Order:Solirubrobacterales	-0.954395	-4.63443	0.0479764
Vermont > EBPR	Proteobacteria	Genus:Thauera	-1.86005	-7.16392	0.00168008
Vermont > EBPR	Planctomycetota	Genus:Planctopirus	-2.02709	-5.422	0.000143647
Vermont > EBPR	Actinobacteriota	Genus:Nocardioides	-3.75901	-3.61055	9.08623e-05
Vermont > EBPR	Actinobacteriota	Genus:Leifsonia	-0.999978	-5.14708	0.0476858
Vermont > EBPR	Proteobacteria	Genus:Caballeronia	-2.58102	-6.75159	9.29888e-05
Vermont > EBPR	Proteobacteria	Genus:Sphingomonas	-1.5462	-1.3299	0.00105123
Vermont > EBPR	Proteobacteria	Genus:Nitrosomonas	-2.27157	-7.44746	9.55695e-05
Vermont > EBPR	Actinobacteriota	Family:Dermatophilaceae	-3.01062	-10.4354	9.08623e-05
Vermont > EBPR	Bacteroidota	Genus:JC017	-1.41159	-5.46831	0.00349737
Vermont > EBPR	Actinobacteriota	Family:Microbacteriaceae	-1.23747	-5.99843	0.0129887
Vermont > EBPR	Planctomycetota	Genus:Planctomyces	-2.05702	-5.8447	0.000111995
Vermont > EBPR	Firmicutes	Genus:Priestia	-1.40352	-6.12091	0.011859
Vermont > EBPR	Planctomycetota	Genus:Paludisphaera	-3.4915	-9.43954	9.08623e-05
Vermont > EBPR	Proteobacteria	Family:Enterobacteriaceae	-1.00212	-1.99749	0.00136571
Vermont > EBPR	Proteobacteria	Genus:Pseudolabrys	-1.16025	-1.91789	0.000774854
Vermont > EBPR	Firmicutes	Genus:Paenibacillus	-0.565965	-1.1964	0.0204692
Vermont > EBPR	Planctomycetota	Genus:Urbifossiella	-1.3679	-1.58721	0.000555695
Vermont > EBPR	Planctomycetota	Genus:UBA2421	-1.53689	-6.00811	0.00204661
Vermont > EBPR	Proteobacteria	Genus:Luteibacter	-2.80155	-7.68723	9.08623e-05
Vermont > EBPR	Bacteroidota	Genus:Edaphocola	-1.78782	-5.99203	0.00217055
Vermont > EBPR	Planctomycetota	Genus:Aquisphaera	-1.29024	-1.39674	0.00132509
Vermont > EBPR	Proteobacteria	Family:Stappiaceae	-2.46188	-7.06153	9.65501e-05
Vermont > EBPR	Bacteroidota	Genus:OLB8	-1.69105	-5.74098	0.000283688
Vermont > EBPR	Acidobacteriota	Genus:Edaphobacter	-0.982565	-5.01219	0.0477668
Vermont > EBPR	Planctomycetota	Genus:Singulisphaera	-3.41836	-3.28576	9.08623e-05
Vermont > EBPR	Cyanobacteria	Genus:GCA-2770975	-1.62855	-5.47086	0.00208364
Vermont > EBPR	Proteobacteria	Genus:Sphingopyxis	-1.71593	-6.00045	0.00176954
Vermont > EBPR	Proteobacteria	Family:Sphingomonadaceae	-1.03891	-5.44379	0.0400495
Vermont > EBPR	Proteobacteria	Genus:Asticcacaulis	-0.996916	-1.1792	0.0115362
Vermont > EBPR	Proteobacteria	Genus:Berkiella	-1.21687	-6.34675	0.0130245
Vermont > EBPR	Proteobacteria	Genus:Dokdonella	-1.80825	-7.78321	0.00187369
Vermont > EBPR_AMF	Proteobacteria	Genus:Aromatoleum	-2.01303	-7.51978	0.00149403
Vermont > EBPR_AMF	Myxococcota	Family:Myxococcaceae	-1.52397	-6.61086	0.00640966
Vermont > EBPR_AMF	Bacteroidota	Family:Chitinophagaceae	-2.55676	-6.64325	8.17307e-06
Vermont > EBPR_AMF	Bacteroidota	Genus:OLB10	-1.19445	-5.34792	0.00973979
Vermont > EBPR_AMF	Gemmatimonadota	Genus:Roseisolibacter	-2.54361	-6.85796	9.84099e-07
Vermont > EBPR_AMF	Proteobacteria	Genus:Paracoccus	-0.992554	-5.0428	0.0315542
Vermont > EBPR_AMF	Firmicutes	Genus:Paenibacillus	-1.24264	-5.17866	0.00820076
Vermont > EBPR_AMF	Planctomycetota	Genus:Planctopirus	-1.72397	-6.33324	0.00136244
Vermont > EBPR_AMF	Actinobacteriota	Genus:Nocardioides	-1.91033	-2.31423	0.000107963
Vermont > EBPR_AMF	Chlamydiota	Genus:HS-T3	-1.01256	-3.95012	0.0162964
Vermont > EBPR_AMF	Proteobacteria	Genus:Caballeronia	-1.35056	-6.0257	0.00587949
Vermont > EBPR_AMF	Proteobacteria	Genus:Sphingomonas	-1.55058	-1.43407	0.000588453
Vermont > EBPR_AMF	Bacteroidota	Genus:Agriterribacter	-0.975745	-5.17745	0.0417551
Vermont > EBPR_AMF	Bacteroidota	Genus:Parafilimonas	-1.22723	-5.08595	0.00776851
Vermont > EBPR_AMF	Proteobacteria	Genus:Nitrosomonas	-2.90928	-7.2517	0
Vermont > EBPR_AMF	Actinobacteriota	Family:Dermatophilaceae	-3.42976	-9.17029	0
Vermont > EBPR_AMF	Myxococcota	Family:Haliangiaceae	-1.43042	-5.72725	0.00195257
Vermont > EBPR_AMF	Planctomycetota	Genus:Paludisphaera	-2.17597	-8.07011	0.00115272
Vermont > EBPR_AMF	Myxococcota	Genus:WRKR01	-2.5358	-6.8007	2.10488e-06
Vermont > EBPR_AMF	Proteobacteria	Family:Enterobacteriaceae	-0.875793	-1.80847	0.00216231
Vermont > EBPR_AMF	Proteobacteria	Genus:Pseudolabrys	-1.02115	-2.01918	0.000949994
Vermont > EBPR_AMF	Firmicutes	Genus:Paenibacillus	-0.924645	-2.00716	0.00113365
Vermont > EBPR_AMF	Firmicutes	Genus:VKM-B-2647	-2.40898	-6.84039	6.67481e-06
Vermont > EBPR_AMF	Planctomycetota	Genus:Urbifossiella	-1.08585	-2.1942	0.00230931
Vermont > EBPR_AMF	Planctomycetota	Genus:UBA2421	-2.39352	-6.82047	1.48469e-05
Vermont > EBPR_AMF	Proteobacteria	Genus:Luteibacter	-1.03554	-6.04662	0.0425984
Vermont > EBPR_AMF	Proteobacteria	Genus:Paraburkholderia	-0.973754	-1.83348	0.00147696
Vermont > EBPR_AMF	Planctomycetota	Genus:Aquisphaera	-1.4639	-1.72442	0.000625251
Vermont > EBPR_AMF	Proteobacteria	Genus:Rhodanobacter	-1.00508	-0.801139	0.0201367
Vermont > EBPR_AMF	Planctomycetota	Family:Pirellulaceae	-0.782453	-1.01258	0.0143506
Vermont > EBPR_AMF	Bdellovibrionota	Genus:GWA1-52-35	-1.19805	-4.96293	0.0083439
Vermont > EBPR_AMF	Acidobacteriota	Genus:WHSN01	-1.28248	-5.8846	0.00746798
Vermont > EBPR_AMF	Omnitrophota	Family:UBA2337	-0.939685	-5.31446	0.0431472
Vermont > EBPR_AMF	Proteobacteria	Family:Stappiaceae	-1.3191	-6.12005	0.00972174
Vermont > EBPR_AMF	Myxococcota	Order:Polyangiales	-1.25777	-6.68743	0.0139855
Vermont > EBPR_AMF	Planctomycetota	Genus:Zavarzinella	-1.1036	-4.74017	0.0109124
Vermont > EBPR_AMF	Acidobacteriota	Genus:Edaphobacter	-1.36906	-6.62102	0.0110134
Vermont > EBPR_AMF	Planctomycetota	Genus:Singulisphaera	-2.27966	-2.84315	4.94879e-05
Vermont > EBPR_AMF	Cyanobacteria	Genus:GCA-2770975	-1.17952	-5.56852	0.00900973
Vermont > EBPR_AMF	Proteobacteria	Genus:UBA6145	-1.44848	-5.51594	0.00177126
Vermont > EBPR_AMF	Bacteroidota	Genus:Chitinophaga	-1.24353	-1.19037	0.0050189
Vermont > EBPR_AMF	Proteobacteria	Family:Sphingomonadaceae	-1.11112	-5.60102	0.0247621
Vermont > EBPR_AMF	Proteobacteria	Genus:Asticcacaulis	-0.745614	-1.04654	0.0227138
Vermont > EBPR_AMF	Proteobacteria	Genus:Berkiella	-1.18326	-5.46356	0.00766886
Vermont > EBPR_AMF	Verrucomicrobiota	Genus:Pedosphaera	-0.963609	-5.28458	0.0475558
Vermont > EBPR_AMF	Proteobacteria	Genus:Dokdonella	-3.12864	-8.3462	0
Vermont > EBPR_AMF	Verrucomicrobiota	Genus:ER46	-1.34915	-6.12631	0.00939246
Vermont > Vermont_AMF	Myxococcota	Family:Myxococcaceae	1.55619	8.73691	0.00507602
Vermont > Vermont_AMF	Proteobacteria	Genus:Afipia	1.66945	8.73011	0.0038338
Vermont > Vermont_AMF	Proteobacteria	Genus:Devosia	2.62588	2.98776	8.88028e-06
Vermont > Vermont_AMF	Firmicutes	Class:Bacilli	3.25669	3.87428	0
Vermont > Vermont_AMF	Actinobacteriota	Genus:Streptomyces	2.58632	2.96613	2.35347e-06
Vermont > Vermont_AMF	Proteobacteria	Family:Xanthomonadaceae	2.46247	2.85548	0.000286917
Vermont > Vermont_AMF	Bacteroidota	Genus:Niastella	0.98124	1.90437	0.024208
Vermont > Vermont_AMF	Firmicutes	Genus:Bacillus	2.52805	3.36859	8.06998e-06
Vermont > Vermont_AMF	Proteobacteria	Family:Labraceae	2.2206	2.48513	0.00458408
Vermont > Vermont_AMF	Proteobacteria	Genus:Bradyrhizobium	0.797271	3.19535	0.0403249
Vermont > Vermont_AMF	Proteobacteria	Genus:Massilia	0.967508	2.72185	0.0246793
Vermont > Vermont_AMF	Firmicutes	Genus:Neobacillus	2.84305	4.39132	0
Vermont > Vermont_AMF	Myxococcota	Family:Polyangiaceae	0.882572	3.79439	0.0162597
Vermont > Vermont_AMF	Proteobacteria	Genus:Frateuria	2.16189	2.17578	0.000311936
Vermont > Vermont_AMF	Proteobacteria	Genus:Cavicella	0.955697	3.24227	0.0124111
Vermont > Vermont_AMF	Firmicutes	Genus:Pullulanibacillus	2.85309	3.92848	0
Vermont > Vermont_AMF	Kingdom:Bacteria	Kingdom:Bacteria	0.751369	2.05113	0.0445744
Vermont > Vermont_AMF	Proteobacteria	Genus:Novosphingobium	0.783016	3.07291	0.0413683
Vermont > Vermont_AMF	Bacteroidota	Genus:Arachidicoccus	1.62462	3.67741	0.000136046
Vermont > Vermont_AMF	Actinobacteriota	Genus:Spirillospora	1.6425	1.62653	0.00114263
Vermont > Vermont_AMF	Proteobacteria	Genus:Ramlibacter	3.68003	3.06471	1.62308e-06
Vermont > Vermont_AMF	Bacteroidota	Genus:Edaphocola	1.82298	9.02279	0.00225858
Vermont > Vermont_AMF	Proteobacteria	Genus:Rhizobium	2.55281	2.65168	0.00012792
Vermont > Vermont_AMF	Proteobacteria	Family:Burkholderiaceae	0.539784	1.26286	0.0168959
Vermont > Vermont_AMF	Planctomycetota	Genus:Aquisphaera	1.2834	2.68523	0.000907624
Vermont > Vermont_AMF	Proteobacteria	Genus:Rhodanobacter	1.53621	1.97875	0.00114736
Vermont > Vermont_AMF	Planctomycetota	Family:Pirellulaceae	1.20894	3.26792	0.0032906
Vermont > Vermont_AMF	Proteobacteria	Genus:Noviherbaspirillum	0.626626	2.70979	0.0478438
Vermont > Vermont_AMF	Proteobacteria	Genus:Dyella	1.06867	1.39998	0.0219313
Vermont > Vermont_AMF	Firmicutes	Genus:Alicyclobacillus	1.8609	5.86397	8.92694e-07
Vermont > Vermont_AMF	Bacteroidota	Genus:Chitinophaga	2.2731	3.12008	0.0010014
Vermont > Vermont_AMF	Proteobacteria	Family:Rhodanobacteraceae	1.48382	1.9804	0.00163649
Vermont > Vermont_AMF	Proteobacteria	Family:Micropepsaceae	1.4051	2.15096	0.00999262
Vermont_AMF > AMF	Verrucomicrobiota	Genus:DSWX01	-1.51236	-4.22964	0.00080014
Vermont_AMF > AMF	Bacteroidota	Genus:Dyadobacter	-0.873792	-3.29642	0.0230183
Vermont_AMF > AMF	Proteobacteria	Genus:Castellaniella	-0.906003	-4.70471	0.0448267
Vermont_AMF > AMF	Planctomycetota	Genus:Planctopirus	-2.18562	-5.90011	0.000147675
Vermont_AMF > AMF	Gemmatimonadota	Family:Gemmatimonadaceae	-0.844719	-3.85615	0.0412362
Vermont_AMF > AMF	Planctomycetota	Genus:Pirellula	-2.25139	-5.74329	0.000156141
Vermont_AMF > AMF	Actinobacteriota	Class:Actinomycetia	-1.16773	-5.72072	0.0360387
Vermont_AMF > AMF	Proteobacteria	Genus:Phenylobacterium	-2.07291	-5.23063	0.000183325
Vermont_AMF > AMF	Planctomycetota	Genus:Caulifigura	-1.89097	-4.94977	0.000257025
Vermont_AMF > AMF	Actinobacteriota	Family:Microbacteriaceae	-1.78663	-5.00225	0.000327699
Vermont_AMF > AMF	Planctomycetota	Genus:Planctomyces	-1.20198	-4.32976	0.00744467
Vermont_AMF > AMF	Planctomycetota	Genus:Paludisphaera	-1.86677	-5.44447	0.00020802
Vermont_AMF > AMF	Proteobacteria	Genus:Pseudolabrys	-0.910288	-3.8619	0.0359898
Vermont_AMF > AMF	Firmicutes	Genus:Paenibacillus	-0.892091	-4.15137	0.0429671
Vermont_AMF > AMF	Proteobacteria	Genus:Paraburkholderia	-1.13451	-5.72035	0.0294693
Vermont_AMF > AMF	Gemmatimonadota	Genus:Gemmatimonas	-1.23366	-4.31117	0.00649465
Vermont_AMF > AMF	Acidobacteriota	Genus:WHSN01	-1.43833	-5.10369	0.00507913
Vermont_AMF > AMF	Proteobacteria	Genus:Rhodopila	-1.51076	-4.02151	0.000950424
Vermont_AMF > AMF	Proteobacteria	Genus:Parvibaculum	-0.801639	-3.87138	0.0468976
Vermont_AMF > AMF	Cyanobacteria	Genus:GCA-2770975	-1.83178	-4.9819	0.000264819
Vermont_AMF > AMF	Proteobacteria	Genus:Dongia	-1.16335	-4.12855	0.0105079
Vermont_AMF > AMF	Verrucomicrobiota	Genus:Pedosphaera	-1.78217	-4.60993	0.000283519
Vermont_AMF > Control	Bacteroidota	Genus:Dyadobacter	-1.41212	-4.82079	0.00400327
Vermont_AMF > Control	Actinobacteriota	Class:Actinomycetia	-1.22068	-5.56238	0.0070439
Vermont_AMF > Control	Planctomycetota	Genus:Caulifigura	-1.09964	-5.13899	0.0320621
Vermont_AMF > Control	Bacteroidota	Genus:JC017	-2.21459	-6.11627	0.000152948
Vermont_AMF > Control	Planctomycetota	Genus:Planctomyces	-1.49719	-5.39955	0.00145399
Vermont_AMF > Control	Planctomycetota	Genus:Paludisphaera	-1.77227	-5.36846	0.000228018
Vermont_AMF > Control	Proteobacteria	Genus:Pandoraea	-1.85148	-6.72182	0.00298374
Vermont_AMF > Control	Firmicutes	Genus:Paenibacillus	-1.07747	-4.86732	0.028491
Vermont_AMF > Control	Proteobacteria	Genus:Pusillimonas	-1.09347	-5.2345	0.0290307
Vermont_AMF > Control	Proteobacteria	Class:Alphaproteobacteria	-1.78113	-5.26955	0.000257801
Vermont_AMF > Control	Proteobacteria	Genus:Legionella	-0.974625	-4.13584	0.0308548
Vermont_AMF > Control	Proteobacteria	Genus:Paraburkholderia	-3.38725	-8.83729	0.000152948
Vermont_AMF > Control	Firmicutes	Genus:Cohnella	-1.189	-5.17756	0.0244406
Vermont_AMF > Control	Proteobacteria	Genus:Acinetobacter	-1.08563	-5.34276	0.0279854
Vermont_AMF > Control	Proteobacteria	Genus:Nevskia	-2.07396	-6.04017	0.00018748
Vermont_AMF > Control	Planctomycetota	Genus:UBA10511	-1.37548	-5.4096	0.00396833
Vermont_AMF > Control	Cyanobacteria	Genus:GCA-2770975	-2.14214	-5.46798	0.00017068
Vermont_AMF > EBPR	Proteobacteria	Genus:Aromatoleum	-1.76832	-5.63708	0.000154441
Vermont_AMF > EBPR	Bacteroidota	Family:Chitinophagaceae	-1.41521	-3.9714	0.00122679
Vermont_AMF > EBPR	Gemmatimonadota	Genus:Roseisolibacter	-0.800861	-2.76315	0.0456883
Vermont_AMF > EBPR	Proteobacteria	Genus:Thauera	-1.03894	-4.06671	0.00966862
Vermont_AMF > EBPR	Proteobacteria	Genus:Reyranella	-1.79392	-4.6723	0.000127046
Vermont_AMF > EBPR	Proteobacteria	Genus:Caballeronia	-1.35914	-3.85804	0.00141112
Vermont_AMF > EBPR	Planctomycetota	Genus:Pirellula	-1.45307	-4.50887	0.000734173
Vermont_AMF > EBPR	Proteobacteria	Genus:Phenylobacterium	-1.34042	-4.65704	0.00427115
Vermont_AMF > EBPR	Actinobacteriota	Genus:Aeromicrobium	-1.57053	-4.29653	0.000766743
Vermont_AMF > EBPR	Planctomycetota	Genus:Caulifigura	-0.797561	-3.08006	0.0365594
Vermont_AMF > EBPR	Proteobacteria	Genus:Nitrosomonas	-1.52451	-4.65138	0.000754758
Vermont_AMF > EBPR	Actinobacteriota	Family:Dermatophilaceae	-2.30336	-7.4264	0.000112153
Vermont_AMF > EBPR	Planctomycetota	Genus:Planctomyces	-1.02596	-2.89921	0.0307036
Vermont_AMF > EBPR	Firmicutes	Genus:Priestia	-0.752977	-3.44932	0.0476673
Vermont_AMF > EBPR	Planctomycetota	Genus:Paludisphaera	-2.39449	-6.53995	0.000112153
Vermont_AMF > EBPR	Proteobacteria	Genus:Pandoraea	-1.49597	-4.40786	0.000455339
Vermont_AMF > EBPR	Proteobacteria	Genus:Pseudolabrys	-2.18079	-5.72631	0.000115245
Vermont_AMF > EBPR	Firmicutes	Genus:Paenibacillus	-2.02161	-5.02532	0.000138925
Vermont_AMF > EBPR	Planctomycetota	Genus:UBA2421	-0.812233	-3.13614	0.031168
Vermont_AMF > EBPR	Proteobacteria	Genus:Luteibacter	-1.81908	-4.87519	0.000161026
Vermont_AMF > EBPR	Proteobacteria	Genus:Paraburkholderia	-2.64531	-6.69201	0.000112153
Vermont_AMF > EBPR	Firmicutes	Genus:Cohnella	-0.925003	-3.20886	0.0136354
Vermont_AMF > EBPR	Bacteroidota	Genus:Haoranjiania	-1.23012	-3.56869	0.00506782
Vermont_AMF > EBPR	Proteobacteria	Family:Stappiaceae	-1.503	-4.28567	0.00114683
Vermont_AMF > EBPR	Proteobacteria	Genus:Sphingopyxis	-0.885082	-3.15573	0.0213542
Vermont_AMF > EBPR	Proteobacteria	Genus:Dokdonella	-1.10674	-4.88719	0.00768196
Vermont_AMF > EBPR_AMF	Proteobacteria	Genus:Aromatoleum	-1.41247	-4.89512	0.00554546
Vermont_AMF > EBPR_AMF	Bacteroidota	Family:Chitinophagaceae	-1.50114	-4.02208	0.00122565
Vermont_AMF > EBPR_AMF	Gemmatimonadota	Genus:Roseisolibacter	-1.60893	-4.28064	0.000865861
Vermont_AMF > EBPR_AMF	Proteobacteria	Genus:Rhizomicrobium	-1.6094	-4.76514	0.000679741
Vermont_AMF > EBPR_AMF	Planctomycetota	Genus:Planctopirus	-1.09965	-3.67845	0.00914289
Vermont_AMF > EBPR_AMF	Proteobacteria	Genus:Reyranella	-1.84791	-4.72414	0.000166583
Vermont_AMF > EBPR_AMF	Proteobacteria	Genus:Caballeronia	-0.75901	-3.45947	0.0411735
Vermont_AMF > EBPR_AMF	Planctomycetota	Genus:Pirellula	-1.66453	-4.25885	0.000545115
Vermont_AMF > EBPR_AMF	Proteobacteria	Genus:Nitrosomonas	-1.81988	-4.58465	0.000208881
Vermont_AMF > EBPR_AMF	Actinobacteriota	Family:Dermatophilaceae	-2.3722	-6.43663	0.000122929
Vermont_AMF > EBPR_AMF	Myxococcota	Family:Haliangiaceae	-0.828463	-3.05023	0.0483308
Vermont_AMF > EBPR_AMF	Planctomycetota	Genus:Paludisphaera	-1.35049	-5.03595	0.00462236
Vermont_AMF > EBPR_AMF	Myxococcota	Genus:WRKR01	-1.57411	-4.0364	0.000535743
Vermont_AMF > EBPR_AMF	Proteobacteria	Genus:Pandoraea	-1.12679	-3.88139	0.00799608
Vermont_AMF > EBPR_AMF	Proteobacteria	Genus:Pseudolabrys	-2.22667	-5.6601	0.000138782
Vermont_AMF > EBPR_AMF	Firmicutes	Genus:Paenibacillus	-2.44547	-5.86579	0.000126013
Vermont_AMF > EBPR_AMF	Firmicutes	Genus:VKM-B-2647	-1.3748	-3.66935	0.00263318
Vermont_AMF > EBPR_AMF	Planctomycetota	Genus:UBA2421	-1.50414	-4.21497	0.000861868
Vermont_AMF > EBPR_AMF	Proteobacteria	Genus:Paraburkholderia	-2.96498	-7.70229	0.000122929
Vermont_AMF > EBPR_AMF	Firmicutes	Genus:Cohnella	-1.12173	-4.13437	0.00730493
Vermont_AMF > EBPR_AMF	Acidobacteriota	Genus:Edaphobacter	-0.809939	-3.89423	0.0474101
Vermont_AMF > EBPR_AMF	Proteobacteria	Genus:Dokdonella	-2.22976	-5.53828	0.000123661
Vermont_AMF > Vermont	Proteobacteria	Genus:Rhizomicrobium	-1.03483	-3.33094	0.0149472
Vermont_AMF > Vermont	Bacteroidota	Genus:Dyadobacter	-1.20336	-4.13986	0.00859691
Vermont_AMF > Vermont	Proteobacteria	Genus:Reyranella	-1.81036	-4.38858	0.000327284
Vermont_AMF > Vermont	Proteobacteria	Family:Methylophilaceae	-2.19763	-6.36371	0.000164932
Vermont_AMF > Vermont	Planctomycetota	Genus:Pirellula	-1.43999	-4.16391	0.00146392
Vermont_AMF > Vermont	Actinobacteriota	Class:Actinomycetia	-0.912331	-3.81988	0.0397796
Vermont_AMF > Vermont	Planctomycetota	Genus:Caulifigura	-1.31164	-4.34044	0.00508434
Vermont_AMF > Vermont	Actinobacteriota	Family:Micrococcaceae	-0.96957	-3.68251	0.0179271
Vermont_AMF > Vermont	Actinobacteriota	Genus:Actinocatenispora	-2.03101	-5.77128	0.000177929
Vermont_AMF > Vermont	Actinobacteriota	Genus:Baekduia	-1.06397	-3.44438	0.0172805
Vermont_AMF > Vermont	Proteobacteria	Genus:Pandoraea	-1.70049	-5.2213	0.00028705
Vermont_AMF > Vermont	Actinobacteriota	Genus:Actinospica	-2.20804	-6.08262	0.00016415
Vermont_AMF > Vermont	Proteobacteria	Genus:Pusillimonas	-1.64496	-4.96954	0.000630868
Vermont_AMF > Vermont	Actinobacteriota	Genus:VAYN01	-1.59826	-4.59825	0.000733542
Vermont_AMF > Vermont	Proteobacteria	Genus:Paraburkholderia	-1.07979	-4.98954	0.0308949
Vermont_AMF > Vermont	Bacteroidota	Genus:Haoranjiania	-1.56466	-4.37817	0.000804101
Vermont_AMF > Vermont	Proteobacteria	Genus:Nevskia	-1.01172	-3.97492	0.0209686
Vermont_AMF > Vermont	Chloroflexota	Genus:GWC2-73-18	-0.872185	-4.17674	0.0486703

## Sheet: Supplementary Table 2
Supplementary Table 2. Spearman correlation analysis evaluating the associations between sorghum nutrient uptake and bacterial taxa. The table presents taxonomic classifications alongside Spearman correlation coefficients, raw P values, and Benjamini-Hochberg (BH) adjusted P values. Significant relationships are highlighted, indicating taxa whose relative abundance was positively or negatively co…
Kingdom	Phylum	Class	Order	Family	Genus	Nutrient	Spearman correlation coefficient	P value	The BH adjusted P
Bacteria	Actinobacteriota	Actinomycetia	Streptomycetales	Streptomycetaceae		Al	0.140428	0.28373	0.700726
Bacteria	Actinobacteriota	Actinomycetia	Streptomycetales	Streptomycetaceae	Streptomyces	Al	-0.0923893	0.48262	0.814495
Bacteria	Actinobacteriota	Actinomycetia	Propionibacteriales	Nocardioidaceae	Nocardioides	Al	-0.22124	0.0893581	0.604602
Bacteria	Firmicutes	Bacilli	Bacillales	DSM-18226	Neobacillus	Al	-0.107534	0.413465	0.749458
Bacteria	Proteobacteria	Gammaproteobacteria	Xanthomonadales	Rhodanobacteraceae	Dyella	Al	-0.316781	0.013662	0.492729
Bacteria	Proteobacteria	Gammaproteobacteria	Nevskiales	Nevskiaceae	Solimonas	Al	0.205018	0.116089	0.612986
Bacteria	Firmicutes	Bacilli	Bacillales	Sporolactobacillaceae	Pullulanibacillus	Al	-0.0905895	0.491226	0.815184
Bacteria	Planctomycetota	Planctomycetia	Isosphaerales	Isosphaeraceae	Singulisphaera	Al	-0.033712	0.798174	0.907548
Bacteria	Proteobacteria	Gammaproteobacteria	Xanthomonadales	Rhodanobacteraceae		Al	0.02665	0.83982	0.939574
Bacteria	Bacteroidota	Bacteroidia	Chitinophagales	Chitinophagaceae	Chitinophaga	Al	0.0517423	0.694595	0.868742
Bacteria	Planctomycetota	Planctomycetia	Isosphaerales	Isosphaeraceae	Aquisphaera	Al	0.00661405	0.959999	0.99198
Bacteria	Proteobacteria	Alphaproteobacteria	Rhizobiales	Devosiaceae	Devosia	Al	0.27941	0.0306153	0.492729
Bacteria	Proteobacteria	Gammaproteobacteria	Burkholderiales	Burkholderiaceae	Ramlibacter	Al	-0.141543	0.280692	0.700726
Bacteria	Proteobacteria	Gammaproteobacteria	Burkholderiales	Burkholderiaceae	Paraburkholderia	Al	-0.109969	0.40291	0.747177
Bacteria	Proteobacteria	Gammaproteobacteria	Xanthomonadales	Rhodanobacteraceae	Rhodanobacter	Al	0.0659451	0.616647	0.83824
Bacteria	Proteobacteria	Alphaproteobacteria	Sphingomonadales	Sphingomonadaceae	Sphingomonas	Al	-0.183526	0.160427	0.643619
Bacteria	Proteobacteria	Gammaproteobacteria	Xanthomonadales	Rhodanobacteraceae	Frateuria	Al	-0.11031	0.401443	0.747177
Bacteria	Proteobacteria	Gammaproteobacteria	Burkholderiales	Burkholderiaceae	Massilia	Al	-0.384942	0.00238952	0.333099
Bacteria	Proteobacteria	Alphaproteobacteria	Micropepsales	Micropepsaceae		Al	0.108026	0.41132	0.748695
Bacteria	Firmicutes	Bacilli	Bacillales	Bacillaceae	Bacillus	Al	0.0683388	0.603885	0.8377
Bacteria	Proteobacteria	Gammaproteobacteria	Pseudomonadales	Moraxellaceae	Cavicella	Al	0.206692	0.113076	0.604602
Bacteria	Proteobacteria	Alphaproteobacteria	Rhizobiales	Xanthobacteraceae		Al	0.0459291	0.727491	0.884482
Bacteria	Actinobacteriota	Actinomycetia	Actinomycetales	Dermatophilaceae		Al	-0.128995	0.325961	0.728813
Bacteria	Bacteroidota	Bacteroidia	Sphingobacteriales	Sphingobacteriaceae	Mucilaginibacter	Al	0.0247627	0.851029	0.941536
Bacteria	Proteobacteria	Gammaproteobacteria	Pseudomonadales	Pseudomonadaceae	Pseudomonas	Al	0.131449	0.316763	0.721517
Bacteria	Proteobacteria	Alphaproteobacteria	Rhizobiales	Rhizobiaceae	Rhizobium	Al	0.0600325	0.648649	0.852121
Bacteria	Firmicutes	Bacilli				Al	-0.0185095	0.888368	0.962149
Bacteria	Actinobacteriota	Actinomycetia	Streptosporangiales	Streptosporangiaceae	Spirillospora	Al	0.0157863	0.904709	0.96974
Bacteria	Proteobacteria	Gammaproteobacteria	Burkholderiales	Burkholderiaceae		Al	0.040687	0.757581	0.885964
Bacteria	Proteobacteria	Gammaproteobacteria	Pseudomonadales	Moraxellaceae		Al	0.111491	0.396387	0.747177
Bacteria	Firmicutes	Bacilli	Alicyclobacillales	Alicyclobacillaceae	Alicyclobacillus	Al	-0.22272	0.0871838	0.604602
Bacteria	Proteobacteria	Gammaproteobacteria	Nevskiales	Nevskiaceae	Stenotrophobium	Al	0.0170631	0.897042	0.969361
Bacteria	Planctomycetota	Planctomycetia	Gemmatales	Gemmataceae	Gemmata	Al	0.135214	0.302975	0.717191
Bacteria	Proteobacteria	Gammaproteobacteria	Xanthomonadales	Xanthomonadaceae		Al	-0.222868	0.086968	0.604602
Bacteria	Actinobacteriota	Actinomycetia	Mycobacteriales	Mycobacteriaceae	Mycobacterium	Al	0.0160759	0.902969	0.96974
Bacteria	Planctomycetota	Planctomycetia	Pirellulales	Pirellulaceae		Al	0.125748	0.338387	0.733222
Bacteria	Planctomycetota	Planctomycetia	Isosphaerales	Isosphaeraceae	Paludisphaera	Al	-0.220583	0.0903376	0.604602
Bacteria	Proteobacteria	Gammaproteobacteria	Burkholderiales	Methylophilaceae	Methylovorus	Al	0.3384	0.00817838	0.479699
Bacteria	Proteobacteria	Alphaproteobacteria	Rhizobiales	Rhizobiaceae	Mesorhizobium	Al	0.0730313	0.57921	0.830816
Bacteria	Proteobacteria	Gammaproteobacteria	Burkholderiales	Burkholderiaceae	Noviherbaspirillum	Al	0.0888444	0.499646	0.815184
Bacteria	Planctomycetota	Planctomycetia	Gemmatales	Gemmataceae	Urbifossiella	Al	0.00822851	0.950246	0.990017
Bacteria						Al	-0.0858628	0.514204	0.815184
Bacteria	Actinobacteriota	Actinomycetia				Al	0.138605	0.290899	0.701579
Bacteria	Bacteroidota	Bacteroidia	Bacteroidales	Tenuifilaceae	SB25	Al	0.249972	0.0540734	0.604602
Bacteria	Proteobacteria	Alphaproteobacteria	Rhizobiales	Xanthobacteraceae	Bradyrhizobium	Al	0.0684006	0.603557	0.8377
Bacteria	Proteobacteria	Alphaproteobacteria	Sphingomonadales	Sphingomonadaceae	Novosphingobium	Al	0.0156287	0.905656	0.96974
Bacteria	Bacteroidota	Bacteroidia	Cytophagales	Cyclobacteriaceae	ELB16-189	Al	0.335071	0.00887133	0.479699
Bacteria	Firmicutes	Bacilli	Paenibacillales	Paenibacillaceae	Paenibacillus	Al	-0.0892234	0.497811	0.815184
Bacteria	Bacteroidota	Bacteroidia	Chitinophagales	Chitinophagaceae	Niastella	Al	0.210219	0.106925	0.604602
Bacteria	Proteobacteria	Alphaproteobacteria	Rhizobiales	Xanthobacteraceae	Pseudolabrys	Al	-0.0736968	0.575748	0.830816
Bacteria	Proteobacteria	Alphaproteobacteria	Caulobacterales	Caulobacteraceae	Phenylobacterium	Al	-0.0852886	0.517032	0.817168
Bacteria	Bacteroidota	Bacteroidia	Chitinophagales	Chitinophagaceae	Arachidicoccus	Al	-0.393093	0.00189034	0.329391
Bacteria	Bdellovibrionota	Bacteriovoracia	Bacteriovoracales	Peredibacteraceae	Peredibacter	Al	0.293963	0.0226223	0.492729
Bacteria	Proteobacteria	Gammaproteobacteria	Burkholderiales	Burkholderiaceae	Bordetella	Al	-0.326049	0.0110118	0.479699
Bacteria	Myxococcota	Polyangia	Polyangiales	Polyangiaceae		Al	0.309952	0.0159503	0.492729
Bacteria	Planctomycetota	Planctomycetia	Pirellulales	Pirellulaceae	Pirellula	Al	0.119732	0.362183	0.744047
Bacteria	Proteobacteria	Gammaproteobacteria	Burkholderiales	Burkholderiaceae	Pandoraea	Al	-0.0710255	0.589701	0.832027
Bacteria	Proteobacteria	Alphaproteobacteria	Caulobacterales	Caulobacteraceae	Asticcacaulis	Al	-0.12202	0.353015	0.739886
Bacteria	Planctomycetota	Planctomycetia	Isosphaerales	Isosphaeraceae		Al	-0.111334	0.397058	0.747177
Bacteria	Acidobacteriota	Vicinamibacteria	Vicinamibacterales	SCN-69-37	SCN-69-37	Al	0.276142	0.0327029	0.492729
Bacteria	Proteobacteria	Alphaproteobacteria	Reyranellales	Reyranellaceae	Reyranella	Al	0.0187905	0.886684	0.962149
Bacteria	Proteobacteria	Gammaproteobacteria	Burkholderiales	Rhodocyclaceae	Aromatoleum	Al	-0.0453294	0.730913	0.884482
Bacteria	Proteobacteria	Gammaproteobacteria	Xanthomonadales	Rhodanobacteraceae	Dokdonella	Al	-0.00433679	0.973765	0.99198
Bacteria	Proteobacteria	Alphaproteobacteria	Rhizobiales	Labraceae		Al	0.0512507	0.697357	0.869513
Bacteria	Acidobacteriota	Vicinamibacteria	Vicinamibacterales	UBA2999	WHSN01	Al	0.074398	0.572111	0.830816
Bacteria	Proteobacteria	Gammaproteobacteria	Enterobacterales	Enterobacteriaceae		Al	-0.197404	0.130575	0.623364
Bacteria	Planctomycetota	Planctomycetia	Planctomycetales	Planctomycetaceae	Caulifigura	Al	-0.0102152	0.938255	0.983404
Bacteria	Actinobacteriota	Actinomycetia	Propionibacteriales	Nocardioidaceae	Aeromicrobium	Al	-0.00450303	0.97276	0.99198
Bacteria	Proteobacteria	Alphaproteobacteria	Rhizobiales	Devosiaceae		Al	0.12782	0.330422	0.733222
Bacteria	Cyanobacteria	Sericytochromatia	UBA7694	UBA7694	GCA-2770975	Al	-0.146436	0.264225	0.684627
Bacteria	Proteobacteria	Gammaproteobacteria	Burkholderiales	Usitatibacteraceae		Al	0.342308	0.00742564	0.479699
Bacteria	Proteobacteria	Alphaproteobacteria	Micropepsales	Micropepsaceae	Rhizomicrobium	Al	0.162322	0.215298	0.667208
Bacteria	Bacteroidota	Bacteroidia	Cytophagales	Cyclobacteriaceae	Chryseolinea	Al	0.323332	0.0117383	0.481269
Bacteria	Planctomycetota	Planctomycetia	Planctomycetales	Planctomycetaceae	Planctopirus	Al	0.119609	0.362678	0.744047
Bacteria	Proteobacteria	Gammaproteobacteria	Burkholderiales	Methylophilaceae		Al	0.267121	0.0390901	0.504551
Bacteria	Myxococcota	Myxococcia	Myxococcales	Myxococcaceae		Al	-0.0464896	0.724296	0.884482
Bacteria	Actinobacteriota	Actinomycetia	Streptomycetales	Catenulisporaceae	Actinospica	Al	0.328321	0.0104343	0.479699
Bacteria	Planctomycetota	Phycisphaerae	Tepidisphaerales	Tepidisphaeraceae	UBA2421	Al	0.000672567	0.995931	0.995931
Bacteria	Firmicutes	Bacilli	Paenibacillales	Paenibacillaceae	Cohnella	Al	-0.277636	0.0317342	0.492729
Bacteria	Proteobacteria	Gammaproteobacteria	Xanthomonadales	Rhodanobacteraceae	Luteibacter	Al	-0.180431	0.16772	0.655402
Bacteria	Planctomycetota	Planctomycetia	Planctomycetales	Planctomycetaceae	Planctomyces	Al	-0.307522	0.0168402	0.492729
Bacteria	Verrucomicrobiota	Verrucomicrobiae	Verrucomicrobiales	Verrucomicrobiaceae	Prosthecobacter	Al	0.149052	0.255693	0.684315
Bacteria	Verrucomicrobiota	Verrucomicrobiae	Pedosphaerales	Pedosphaeraceae	Pedosphaera	Al	0.174062	0.183487	0.659437
Bacteria	Proteobacteria	Alphaproteobacteria	Dongiales	Dongiaceae	Dongia	Al	0.294507	0.0223617	0.492729
Bacteria	Chloroflexota	Chloroflexia	Thermomicrobiales			Al	-0.0236251	0.8578	0.946024
Bacteria	Proteobacteria	Gammaproteobacteria	Burkholderiales	Nitrosomonadaceae	Nitrosomonas	Al	-0.0779939	0.553627	0.830816
Bacteria	Proteobacteria	Gammaproteobacteria	Burkholderiales	Burkholderiaceae	Castellaniella	Al	0.296247	0.0215448	0.492729
Bacteria	Proteobacteria	Alphaproteobacteria	Sphingomonadales	Sphingomonadaceae		Al	-0.112527	0.391986	0.747177
Bacteria	Proteobacteria	Alphaproteobacteria				Al	0.209164	0.108738	0.604602
Bacteria	Actinobacteriota	Actinomycetia	Actinomycetales	Microbacteriaceae		Al	0.0675171	0.608253	0.8377
Bacteria	Planctomycetota	Planctomycetia	Planctomycetales	UBA10511	UBA10511	Al	-0.114793	0.382462	0.747177
Bacteria	Proteobacteria	Alphaproteobacteria	Rhodobacterales	Rhodobacteraceae	Paracoccus	Al	-0.0654389	0.61936	0.83824
Bacteria	Firmicutes	Bacilli	Bacillales	Bacillaceae	Priestia	Al	-0.101546	0.440102	0.770764
Bacteria	Gemmatimonadota	Gemmatimonadetes	Gemmatimonadales	Gemmatimonadaceae	Gemmatimonas	Al	-0.00937921	0.943299	0.985726
Bacteria	Gemmatimonadota	Gemmatimonadetes	Gemmatimonadales	Gemmatimonadaceae	Roseisolibacter	Al	0.0258611	0.844502	0.940284
Bacteria	Proteobacteria	Gammaproteobacteria	Burkholderiales	Burkholderiaceae	Caballeronia	Al	-0.0903657	0.492302	0.815184
Bacteria	Myxococcota	Polyangia	Polyangiales			Al	0.154509	0.238503	0.676499
Bacteria	Proteobacteria	Gammaproteobacteria	Nevskiales	Nevskiaceae	Nevskia	Al	-0.0733242	0.577685	0.830816
Bacteria	Proteobacteria	Gammaproteobacteria	Pseudomonadales	Moraxellaceae	Acinetobacter	Al	-0.33327	0.00926701	0.479699
Bacteria	Verrucomicrobiota	Verrucomicrobiae	Opitutales	Opitutaceae	ER46	Al	0.477472	0.000114504	0.0458852
Bacteria	Bacteroidota	Bacteroidia	Bacteroidales	Marinilabiliaceae	JC017	Al	-0.302302	0.018896	0.492729
Bacteria	Bacteroidota	Bacteroidia	Chitinophagales	Chitinophagaceae	Ginsengibacter	Al	0.0321245	0.807491	0.91219
Bacteria	Proteobacteria	Gammaproteobacteria	Burkholderiales	Burkholderiaceae	Pusillimonas	Al	0.062848	0.633327	0.847272
Bacteria	Bacteroidota	Bacteroidia	Chitinophagales	Chitinophagaceae		Al	0.132215	0.313925	0.721517
Bacteria	Proteobacteria	Gammaproteobacteria	Xanthomonadales	Xanthomonadaceae	Luteimonas	Al	-0.0599312	0.649204	0.852121
Bacteria	Acidobacteriota	Acidobacteriae	Acidobacteriales	Acidobacteriaceae	Edaphobacter	Al	-0.146559	0.263822	0.684627
Bacteria	Bacteroidota	Bacteroidia	Chitinophagales	Chitinophagaceae	Haoranjiania	Al	-0.0756215	0.56579	0.830816
Bacteria	Proteobacteria	Gammaproteobacteria	Nevskiales	Nevskiaceae		Al	0.329419	0.010165	0.479699
Bacteria	Proteobacteria	Gammaproteobacteria	Pseudomonadales	Pseudomonadaceae		Al	0.0696304	0.597047	0.83703
Bacteria	Bacteroidota	Bacteroidia	Cytophagales	Spirosomaceae	Dyadobacter	Al	-0.0879766	0.503862	0.815184
Bacteria	Proteobacteria	Gammaproteobacteria	Burkholderiales	Rhodocyclaceae	Thauera	Al	-0.0838628	0.524088	0.82458
Bacteria	Proteobacteria	Alphaproteobacteria	Rhizobiales	Xanthobacteraceae	Afipia	Al	-0.0817557	0.534602	0.83013
Bacteria	Proteobacteria	Alphaproteobacteria	Parvibaculales	Parvibaculaceae	Parvibaculum	Al	0.0870837	0.508217	0.815184
Bacteria	Proteobacteria	Alphaproteobacteria	Rhizobiales	Stappiaceae		Al	-0.130931	0.318691	0.722948
Bacteria	Firmicutes	Bacilli	Paenibacillales	NBRC-103111	VKM-B-2647	Al	0.0660294	0.616195	0.83824
Bacteria	Acidobacteriota	Vicinamibacteria	Vicinamibacterales	UBA2999		Al	0.179391	0.170224	0.656884
Bacteria	Actinobacteriota	Actinomycetia	Mycobacteriales	Micromonosporaceae	Actinocatenispora	Al	0.135056	0.303546	0.717191
Bacteria	Bacteroidota	Bacteroidia	Cytophagales	Cyclobacteriaceae	Ohtaekwangia	Al	0.167767	0.200093	0.66242
Bacteria	Bacteroidota	Bacteroidia	Chitinophagales	Chitinophagaceae	Edaphocola	Al	-0.107172	0.415051	0.749458
Bacteria	Gemmatimonadota	Gemmatimonadetes	Gemmatimonadales	Gemmatimonadaceae		Al	0.116761	0.374302	0.747177
Bacteria	Proteobacteria	Alphaproteobacteria	Rhizobiales	Rhizobiaceae	Shinella	Al	-0.208651	0.109628	0.604602
Bacteria	Verrucomicrobiota	Verrucomicrobiae	Opitutales	Opitutaceae	Lacunisphaera	Al	0.279524	0.0305447	0.492729
Bacteria	Chloroflexota	Limnocylindria	Limnocylindrales	CSP1-4	GWC2-73-18	Al	0.124102	0.344796	0.733222
Bacteria	Proteobacteria	Gammaproteobacteria	Berkiellales	Berkiellaceae	Berkiella	Al	-0.00589987	0.964315	0.99198
Bacteria	Actinobacteriota	Thermoleophilia	Solirubrobacterales	Solirubrobacteraceae	Baekduia	Al	-0.14878	0.256573	0.684315
Bacteria	Myxococcota	Polyangia	Polyangiales	SLQV01	SLQV01	Al	0.374781	0.0031744	0.368759
Bacteria	Proteobacteria	Gammaproteobacteria	Burkholderiales	SG8-41	UBA5216	Al	0.173727	0.184345	0.659437
Bacteria	Dependentiae	Babeliae	Babeliales	Vermiphilaceae	Vermiphilus	Al	0.135517	0.301883	0.717191
Bacteria	Proteobacteria	Alphaproteobacteria	Sphingomonadales	Sphingomonadaceae	Sphingopyxis	Al	-0.103499	0.431308	0.770764
Bacteria	Bacteroidota	Bacteroidia	Chitinophagales	Chitinophagaceae	Flavipsychrobacter	Al	0.0409234	0.756216	0.885853
Bacteria	Actinobacteriota	Thermoleophilia	Solirubrobacterales	70-9	VAYN01	Al	0.100828	0.443356	0.770764
Bacteria	Bdellovibrionota	Bdellovibrionia	UBA1018	UBA1018	GWA1-52-35	Al	0.00164889	0.990024	0.992873
Bacteria	Myxococcota	Myxococcia	Myxococcales	Myxococcaceae	WRKR01	Al	0.105225	0.423624	0.760995
Bacteria	Proteobacteria	Gammaproteobacteria	Legionellales	Legionellaceae	Legionella	Al	-0.106455	0.418194	0.753182
Bacteria	Actinobacteriota					Al	0.0861593	0.512747	0.815184
Bacteria	Actinobacteriota	Actinomycetia	Actinomycetales	Microbacteriaceae	Leifsonia	Al	-0.165419	0.206555	0.667067
Bacteria	Bacteroidota	Bacteroidia	Chitinophagales	Chitinophagaceae	Sediminibacterium	Al	0.29358	0.0228076	0.492729
Bacteria	Myxococcota	UBA796	UBA796	GCA-2862545	REDI01	Al	0.080931	0.538745	0.83013
Bacteria	Verrucomicrobiota	Verrucomicrobiae	Pedosphaerales	CAIYYI01	DSWX01	Al	0.170002	0.19408	0.659437
Bacteria	Proteobacteria	Gammaproteobacteria	Burkholderiales	Burkholderiaceae	Trinickia	Al	0.0911564	0.488507	0.815184
Bacteria	Firmicutes	Bacilli	Bacillales	DSM-1321	Peribacillus	Al	0.119278	0.364017	0.744047
Bacteria	Proteobacteria	Gammaproteobacteria	Burkholderiales	Burkholderiaceae	Candidimonas	Al	-0.144055	0.272157	0.690019
Bacteria	Proteobacteria	Alphaproteobacteria	Acetobacterales	Acetobacteraceae	Rhodopila	Al	-0.0185782	0.887956	0.962149
Bacteria	Bacteroidota	Bacteroidia	Sphingobacteriales	Sphingobacteriaceae	Pararcticibacter	Al	0.209511	0.108138	0.604602
Bacteria	Proteobacteria	Gammaproteobacteria	Burkholderiales	Burkholderiaceae	Burkholderia	Al	-0.298949	0.020326	0.492729
Bacteria	Actinobacteriota	Actinomycetia	Actinomycetales	Micrococcaceae		Al	0.158997	0.22497	0.676499
Bacteria	Bacteroidota	Bacteroidia	Chitinophagales	Chitinophagaceae	Agriterribacter	Al	0.116384	0.375856	0.747177
Bacteria	Proteobacteria	Alphaproteobacteria	Caulobacterales	Hyphomonadaceae	Asprobacter	Al	0.168195	0.198932	0.66242
Bacteria	Bacteroidota	Bacteroidia	AKYH767-A	OLB10	OLB10	Al	-0.16241	0.215047	0.667208
Bacteria	Chloroflexota	Anaerolineae	Caldilineales	Caldilineaceae		Al	0.141909	0.279437	0.700602
Bacteria	Acidobacteriota	Acidobacteriae	Bryobacterales	Bryobacteraceae	KBS-96	Al	0.147959	0.259237	0.684425
Bacteria	Verrucomicrobiota	Verrucomicrobiae	Chthoniobacterales	Terrimicrobiaceae	Terrimicrobium	Al	-0.216917	0.095958	0.604602
Bacteria	Bacteroidota	Bacteroidia	AKYH767	B-17BO	UBA4416	Al	0.349994	0.00611966	0.479699
Bacteria	Myxococcota	Polyangia	Haliangiales	Haliangiaceae	Haliangium	Al	0.128496	0.32785	0.730069
Bacteria	Firmicutes	Bacilli	Paenibacillales	NBRC-103111	Paenibacillus	Al	-0.100096	0.446689	0.770764
Bacteria	Bacteroidota	Bacteroidia	Chitinophagales	Chitinophagaceae	Parafilimonas	Al	0.0749457	0.569277	0.830816
Bacteria	Proteobacteria	Alphaproteobacteria	Sphingomonadales	Sphingomonadaceae	Allosphingosinicella	Al	0.232047	0.0744144	0.604602
Bacteria	Bacteroidota	Bacteroidia	Sphingobacteriales	Sphingobacteriaceae	Pedobacter	Al	0.0629036	0.633026	0.847272
Bacteria	Planctomycetota	Planctomycetia	Pirellulales	Pirellulaceae	Anammoximicrobium	Al	0.139858	0.286516	0.700726
Bacteria	Omnitrophota	Omnitrophia	Omnitrophales	UBA2337		Al	0.0592157	0.653122	0.852121
Bacteria	Bacteroidota	Bacteroidia	Sphingobacteriales	Sphingobacteriaceae		Al	0.170543	0.192642	0.659437
Bacteria	Cyanobacteria	Vampirovibrionia				Al	0.143734	0.273236	0.690019
Bacteria	Proteobacteria	Alphaproteobacteria	Rhizobiales	Rhizobiaceae		Al	-0.0606575	0.645235	0.852121
Bacteria	Gemmatimonadota	Gemmatimonadetes	Longimicrobiales	Longimicrobiaceae	Longimicrobium	Al	-0.110322	0.40139	0.747177
Bacteria	Proteobacteria	Alphaproteobacteria	Rhizobiales	Kaistiaceae	Bauldia	Al	0.0834905	0.525938	0.825628
Bacteria	Verrucomicrobiota	Verrucomicrobiae	Pedosphaerales	UBA11358	UBA11358	Al	0.203438	0.118989	0.618979
Bacteria	Proteobacteria	Alphaproteobacteria	Caulobacterales	Caulobacteraceae	PMMR1	Al	0.151849	0.246779	0.677184
Bacteria	Planctomycetota	Planctomycetia	Isosphaerales	Isosphaeraceae	Tundrisphaera	Al	-0.0557302	0.672345	0.853792
Bacteria	Proteobacteria	Alphaproteobacteria	Rhizobiales	Xanthobacteraceae	Rhodopseudomonas	Al	0.00675957	0.95912	0.99198
Bacteria	Bacteroidota	Bacteroidia	Chitinophagales	Saprospiraceae	OLB8	Al	-0.0598345	0.649733	0.852121
Bacteria	Proteobacteria	Alphaproteobacteria	Rhizobiales	Rhizobiaceae	Sinorhizobium	Al	-0.248828	0.0552205	0.604602
Bacteria	Myxococcota	Polyangia	Polyangiales	Polyangiaceae	Aetherobacter	Al	0.327287	0.0106938	0.479699
Bacteria	Acidobacteriota	Blastocatellia	Pyrinomonadales	Pyrinomonadaceae	OLB17	Al	0.00392774	0.976239	0.99198
Bacteria	Myxococcota	Polyangia	Haliangiales	Haliangiaceae		Al	0.113118	0.389488	0.747177
Bacteria	Actinobacteriota	Thermoleophilia	Solirubrobacterales			Al	-0.0847858	0.519515	0.819235
Bacteria	Proteobacteria	Gammaproteobacteria				Al	0.231374	0.0752831	0.604602
Bacteria	Proteobacteria	Alphaproteobacteria	Rhizobiales	Hyphomicrobiaceae	Hyphomicrobium	Al	-0.108939	0.407356	0.747177
Bacteria	Armatimonadota	Fimbriimonadia	Fimbriimonadales	Fimbriimonadaceae	Fimbriimonas	Al	0.0788927	0.549053	0.83013
Bacteria	Firmicutes	Bacilli	Bacillales	Bacillaceae		Al	-0.276996	0.0321464	0.492729
Bacteria	Proteobacteria	Gammaproteobacteria	Steroidobacterales	Steroidobacteraceae		Al	0.0139834	0.91555	0.973445
Bacteria	Proteobacteria	Gammaproteobacteria	Burkholderiales	Burkholderiaceae	Ralstonia	Al	-0.208423	0.110025	0.604602
Bacteria	Chloroflexota	Limnocylindria				Al	-0.0382007	0.771983	0.895294
Bacteria	Proteobacteria	Alphaproteobacteria	Micavibrionales	Micavibrionaceae	UBA6145	Al	0.236059	0.0694015	0.604602
Bacteria	Proteobacteria	Alphaproteobacteria	Rhizobiales	Rhizobiaceae	Ensifer	Al	-0.110529	0.400503	0.747177
Bacteria	Acidobacteriota	Thermoanaerobaculia	UBA5704	UBA5704		Al	-0.0291367	0.825099	0.926078
Bacteria	Proteobacteria	Alphaproteobacteria	Rhizobiales	Beijerinckiaceae		Al	-0.210962	0.105664	0.604602
Bacteria	Gemmatimonadota	Gemmatimonadetes	Gemmatimonadales	GWC2-71-9	Palsa-1233	Al	0.112593	0.391708	0.747177
Bacteria	Myxococcota	Myxococcia	Myxococcales	Vulgatibacteraceae	Vulgatibacter	Al	0.0913864	0.487406	0.815184
Bacteria	Proteobacteria	Gammaproteobacteria	DSM-16500	DSM-16500	Aquicella	Al	0.28413	0.0277981	0.492729
Bacteria	Actinobacteriota	Acidimicrobiia	Acidimicrobiales	JACDCH01	VFJN01	Al	0.124476	0.343336	0.733222
Bacteria	Planctomycetota	Planctomycetia	Gemmatales	Gemmataceae		Al	-0.165358	0.206724	0.667067
Bacteria	Actinobacteriota	Actinomycetia	Mycobacteriales	Geodermatophilaceae	Geodermatophilus	Al	-0.0981017	0.455843	0.784501
Bacteria	Proteobacteria	Gammaproteobacteria	Legionellales	Legionellaceae		Al	-0.0291507	0.825016	0.926078
Bacteria	Proteobacteria	Gammaproteobacteria	Steroidobacterales	Steroidobacteraceae	SCUD01	Al	0.148708	0.256804	0.684315
Bacteria	Planctomycetota	Planctomycetia	Pirellulales			Al	0.0818469	0.534145	0.83013
Bacteria	Proteobacteria	Alphaproteobacteria	Rhodobacterales	Rhodobacteraceae		Al	-0.316429	0.0137725	0.492729
Bacteria	Bacteroidota	Bacteroidia	Flavobacteriales	Crocinitomicaceae	Fluviicola	Al	0.0769575	0.558925	0.830816
Bacteria	Proteobacteria	Alphaproteobacteria	Rhizobiales	Beijerinckiaceae	Microvirga	Al	-0.174764	0.181699	0.659437
Bacteria	Planctomycetota	Planctomycetia	Planctomycetales	Planctomycetaceae	Schlesneria	Al	0.132944	0.311243	0.721517
Bacteria	Chlamydiota	Chlamydiia	Chlamydiales	Parachlamydiaceae	HS-T3	Al	-0.0461594	0.726178	0.884482
Bacteria	Proteobacteria	Alphaproteobacteria	Rhodospirillales			Al	0.00535313	0.96762	0.99198
Bacteria	Proteobacteria	Gammaproteobacteria	Pseudomonadales			Al	0.109995	0.402798	0.747177
Bacteria	Chloroflexota	Chloroflexia	Chloroflexales	Roseiflexaceae	Kouleothrix	Al	-0.00632806	0.961727	0.99198
Bacteria	Sumerlaeota	Sumerlaeia	Sumerlaeales	Sumerlaeaceae	HGW-BRC1-1	Al	0.244742	0.0594763	0.604602
Bacteria	Proteobacteria	Gammaproteobacteria	Pseudomonadales	Alcanivoracaceae	Alcanivorax	Al	-0.0977741	0.457357	0.784919
Bacteria	Proteobacteria	Alphaproteobacteria	Micavibrionales	UBA2020	UBA2020	Al	0.261046	0.0439473	0.537391
Bacteria	Verrucomicrobiota	Verrucomicrobiae	Verrucomicrobiales	Verrucomicrobiaceae	VFKE01	Al	-0.0975618	0.458339	0.784919
Bacteria	Bdellovibrionota	Bdellovibrionia	Bdellovibrionales	Bdellovibrionaceae	Bdellovibrio	Al	-0.0394334	0.764833	0.890271
Bacteria	Bacteroidota	Bacteroidia	Sphingobacteriales	Sphingobacteriaceae	Pelobium	Al	-0.265386	0.0404296	0.512353
Bacteria	Myxococcota	Polyangia	Polyangiales	Polyangiaceae	Palsa-1150	Al	-0.0394196	0.764913	0.890271
Bacteria	Actinobacteriota	Actinomycetia	Propionibacteriales	Nocardioidaceae	Marmoricola	Al	-0.191696	0.142299	0.627736
Bacteria	Planctomycetota	Planctomycetia	Gemmatales	Gemmataceae	Zavarzinella	Al	0.0489964	0.710068	0.873793
Bacteria	Acidobacteriota	Vicinamibacteria	Vicinamibacterales			Al	-0.062368	0.635928	0.849123
Bacteria	Actinobacteriota	Actinomycetia	Mycobacteriales	Jatrophihabitantaceae	Jatrophihabitans	Al	-0.182221	0.163475	0.647397
Bacteria	Proteobacteria	Alphaproteobacteria	Sphingomonadales	Sphingomonadaceae	Sphingomicrobium	Al	-0.0773269	0.557034	0.830816
Bacteria	Chloroflexota	Dehalococcoidia	DSTF01	WHTK01	WHTK01	Al	0.161645	0.217244	0.667208
Bacteria	Acidobacteriota	Acidobacteriae	Bryobacterales	Bryobacteraceae		Al	0.100375	0.44542	0.770764
Bacteria	Bacteroidota	SZUA-365	SZUA-365	SZUA-365	BM516	Al	0.133684	0.308531	0.721517
Bacteria	Proteobacteria	Alphaproteobacteria	Rhizobiales	Beijerinckiaceae	Bosea	Al	-0.276523	0.0324538	0.492729
Bacteria	Proteobacteria	Gammaproteobacteria	DSM-16500	DSM-16500	UBA4722	Al	-0.148742	0.256694	0.684315
Bacteria	Proteobacteria	Gammaproteobacteria	Burkholderiales	SG8-39	SCGC-AG-212-J23	Al	0.154823	0.237536	0.676499
Bacteria	Bacteroidota	Bacteroidia	Chitinophagales	Chitinophagaceae	Edaphobaculum	Al	-0.145489	0.267362	0.687374
Bacteria	Chloroflexota	Anaerolineae				Al	-0.303587	0.0183708	0.492729
Bacteria	Planctomycetota	Phycisphaerae	WQYP01	WQYP01	WQYP01	Al	-0.0184061	0.888987	0.962149
Bacteria	Actinobacteriota	Acidimicrobiia	Acidimicrobiales	RAAP-2	Bog-756	Al	-0.0515826	0.695492	0.868742
Bacteria	Bacteroidota	Bacteroidia	Cytophagales	Cyclobacteriaceae	Chryseotalea	Al	0.176777	0.17664	0.656884
Bacteria	Planctomycetota	Planctomycetia	Pirellulales	UBA7805	MB-PLM-2	Al	0.169722	0.194826	0.659437
Bacteria	Proteobacteria	Alphaproteobacteria	Sphingomonadales	Sphingomonadaceae	Sphingobium	Al	-0.242094	0.0623736	0.604602
Bacteria	Proteobacteria	Alphaproteobacteria	Rhizobiales	UBA4765	UBA4765	Al	-0.173399	0.185189	0.659437
Bacteria	Proteobacteria	Alphaproteobacteria	Acetobacterales	Acetobacteraceae		Al	-0.0372096	0.777745	0.897497
Bacteria	Proteobacteria	Alphaproteobacteria	Rhizobiales	Rhizobiaceae	Allorhizobium	Al	0.0694405	0.59805	0.83703
Bacteria	Proteobacteria	Alphaproteobacteria	Rhodospirillales	GLO-3	GLO-3	Al	0.219543	0.0919055	0.604602
Bacteria	Proteobacteria	Gammaproteobacteria	Xanthomonadales	Xanthomonadaceae	Pseudoxanthomonas	Al	-0.0532949	0.685901	0.861392
Bacteria	Bacteroidota	Bacteroidia	Chitinophagales	Chitinophagaceae	Niabella	Al	-0.29236	0.0234058	0.492729
Bacteria	Proteobacteria	Alphaproteobacteria	Rhizobiales	Xanthobacteraceae	Aquabacter	Al	-0.116245	0.376429	0.747177
Bacteria	Verrucomicrobiota	Verrucomicrobiae	Pedosphaerales	UBA11358	WYBW01	Al	-0.0345647	0.79318	0.907548
Bacteria	Planctomycetota	Planctomycetia	Planctomycetales	Planctomycetaceae	Planctomicrobium	Al	0.145224	0.268244	0.687374
Bacteria	Proteobacteria	Alphaproteobacteria	Caulobacterales	Caulobacteraceae		Al	-0.126155	0.336813	0.733222
Bacteria	Actinobacteriota	Actinomycetia	Actinomycetales	Micrococcaceae	Paenarthrobacter	Al	-0.153024	0.243099	0.676551
Bacteria	Firmicutes	Bacilli	Paenibacillales	NBRC-103111		Al	-0.0875673	0.505856	0.815184
Bacteria	Actinobacteriota	Actinomycetia	Actinomycetales	Cellulomonadaceae	Cellulomonas	Al	0.0784894	0.551103	0.830816
Bacteria	Proteobacteria	Alphaproteobacteria	Sphingomonadales	Sphingomonadaceae	Rhizorhabdus	Al	-0.0742027	0.573123	0.830816
Bacteria	Planctomycetota	UBA1135	UBA2386	UBA2386	UBA2386	Al	-0.256452	0.047941	0.556914
Bacteria	Myxococcota	Polyangia	Polyangiales	Polyangiaceae	Chondromyces	Al	0.147466	0.260843	0.684627
Bacteria	Proteobacteria	Alphaproteobacteria	Rhizobiales	Kaistiaceae	Kaistia	Al	-0.245577	0.058586	0.604602
Bacteria	Fibrobacterota	Fibrobacteria	Fibrobacterales	Fibrobacteraceae		Al	0.198258	0.128886	0.61954
Bacteria	Bacteroidota	Bacteroidia	AKYH767	B-17BO	UBA2475	Al	-0.0719482	0.584864	0.830816
Bacteria	Actinobacteriota	Actinomycetia	Actinomycetales	Microbacteriaceae	Gryllotalpicola	Al	-0.186422	0.153818	0.643619
Bacteria	Bacteroidota	Bacteroidia	AKYH767	2-12-FULL-35-15	2-12-FULL-35-15	Al	0.399483	0.00156655	0.329391
Bacteria	Proteobacteria	Alphaproteobacteria	Azospirillales	Azospirillaceae	Azospirillum	Al	-0.245661	0.0584962	0.604602
Bacteria	Planctomycetota	Planctomycetia	Pirellulales	Lacipirellulaceae		Al	-0.0681743	0.604758	0.8377
Bacteria	Bacteroidota	Bacteroidia	Cytophagales	Cytophagaceae	Cytophaga	Al	0.121205	0.356265	0.739886
Bacteria	Chloroflexota	Anaerolineae	Aggregatilineales	A4b		Al	0.0598707	0.649535	0.852121
Bacteria	Planctomycetota	Planctomycetia	Planctomycetales	Planctomycetaceae	Alienimonas	Al	-0.0685655	0.602682	0.8377
Bacteria	Bacteroidota	Bacteroidia	Cytophagales	Cyclobacteriaceae		Al	0.0793049	0.546961	0.83013
Bacteria	Bacteroidota	Bacteroidia	Cytophagales	Cytophagaceae	Sporocytophaga	Al	0.149021	0.255793	0.684315
Bacteria	Proteobacteria	Alphaproteobacteria	Caedimonadales	Nucleicultricaceae	Nucleicultrix	Al	-0.0753291	0.567298	0.830816
Bacteria	Patescibacteria	Saccharimonadia	UBA4664	UBA4664	UBA4664	Al	0.0697772	0.596272	0.83703
Bacteria	Proteobacteria	Gammaproteobacteria	Pseudomonadales	Pseudohongiellaceae		Al	0.296752	0.0213123	0.492729
Bacteria	Actinobacteriota	Actinomycetia	Mycobacteriales	Mycobacteriaceae	Nocardia	Al	-0.00851402	0.948522	0.9897
Bacteria	Planctomycetota	Planctomycetia	Planctomycetales	Planctomycetaceae		Al	0.00222759	0.986523	0.992217
Bacteria	Proteobacteria	Alphaproteobacteria	Rhodospirillales	Rhodospirillaceae	SCTM01	Al	0.100082	0.446756	0.770764
Bacteria	Proteobacteria	Alphaproteobacteria	Rhizobiales	Rhizobiaceae	Ochrobactrum	Al	-0.125212	0.340467	0.733222
Bacteria	Proteobacteria	Gammaproteobacteria	Burkholderiales	Methylophilaceae	Pseudomethylobacillus	Al	-0.272374	0.0352565	0.492729
Bacteria	Actinobacteriota	Actinomycetia	Mycobacteriales	Pseudonocardiaceae	Pseudonocardia	Al	0.0870342	0.508459	0.815184
Bacteria	Bacteroidota	Kapabacteria	Kapabacteriales	Kapabacteriaceae	Kapabacteria	Al	0.152835	0.243691	0.676551
Bacteria	Proteobacteria	Alphaproteobacteria	Rhizobiales	Aestuariivirgaceae	Aestuariivirga	Al	0.213088	0.102116	0.604602
Bacteria	Proteobacteria	Gammaproteobacteria	Burkholderiales	Burkholderiaceae	Achromobacter	Al	-0.213471	0.101485	0.604602
Bacteria	Acidobacteriota	Acidobacteriae	Acidobacteriales	Acidobacteriaceae	Terriglobus	Al	-0.00420483	0.974563	0.99198
Bacteria	Chloroflexota	Dehalococcoidia	UBA2979	UBA2979	RBC038	Al	0.0525724	0.689942	0.864909
Bacteria	Bdellovibrionota	Bdellovibrionia	Bdellovibrionales	SG-bin7	SG-bin7	Al	0.0664417	0.61399	0.83824
Bacteria	Proteobacteria	Gammaproteobacteria	GCA-2729495	GCA-2729495	QUBU01	Al	0.152232	0.245577	0.676551
Bacteria	Proteobacteria	Alphaproteobacteria	Rhizobiales	Xanthobacteraceae	Z2-YC6860	Al	-0.0236885	0.857423	0.946024
Bacteria	Actinobacteriota	Actinomycetia	Mycobacteriales	Antricoccaceae		Al	-0.252701	0.0514176	0.587509
Bacteria	Proteobacteria	Alphaproteobacteria	Sphingomonadales	Sphingomonadaceae	Sphingosinicella	Al	-0.148106	0.258758	0.684425
Bacteria	Firmicutes	Moorellia	Thermacetogeniales	Thermacetogeniaceae	Palsa-1188	Al	-0.344719	0.00699198	0.479699
Bacteria	Actinobacteriota	Thermoleophilia	Gaiellales	Gaiellaceae	Palsa-739	Al	-0.0026115	0.9842	0.992217
Bacteria	Proteobacteria	Gammaproteobacteria	Xanthomonadales	Xanthomonadaceae	Stenotrophomonas	Al	0.0448632	0.733578	0.884482
Bacteria	Bdellovibrionota	Oligoflexia	Oligoflexales	Bin106	Bin106	Al	0.111962	0.394384	0.747177
Bacteria	Proteobacteria	Gammaproteobacteria	Immundisolibacterales	Immundisolibacteraceae	Immundisolibacter	Al	0.0666411	0.612924	0.83824
Bacteria	Verrucomicrobiota	Verrucomicrobiae	Verrucomicrobiales	Verrucomicrobiaceae		Al	0.013878	0.916184	0.973445
Bacteria	Bacteroidota	Bacteroidia	Chitinophagales	Chitinophagaceae	FW021-bin31	Al	-0.0433595	0.742193	0.884482
Bacteria	Armatimonadota	Abditibacteria	Abditibacteriales	Abditibacteriaceae	Abditibacterium	Al	-0.0682734	0.604232	0.8377
Bacteria	Planctomycetota	Planctomycetia	Pirellulales	Lacipirellulaceae	Pirellulimonas	Al	-0.171499	0.190123	0.659437
Bacteria	Proteobacteria	Alphaproteobacteria	Caulobacterales	Caulobacteraceae	Caulobacter	Al	-0.000797464	0.995175	0.995931
Bacteria	Chloroflexota	Anaerolineae	Aggregatilineales	A4b	OLB15	Al	-0.119401	0.363521	0.744047
Bacteria	Proteobacteria	Alphaproteobacteria	Micavibrionales	Micavibrionaceae	UBA7657	Al	-0.152467	0.24484	0.676551
Bacteria	Bacteroidota	Bacteroidia	Chitinophagales	Saprospiraceae	OLB9	Al	0.0322668	0.806655	0.91219
Bacteria	Actinobacteriota	Actinomycetia	Mycobacteriales	Pseudonocardiaceae	Amycolatopsis	Al	-0.0189553	0.885697	0.962149
Bacteria	Planctomycetota	Planctomycetia	Pirellulales	Pirellulaceae	Anatilimnocola	Al	0.143866	0.272792	0.690019
Bacteria	Bacteroidota	Bacteroidia	Chitinophagales	Chitinophagaceae	Flavitalea	Al	-0.043579	0.740933	0.884482
Bacteria	Planctomycetota	Phycisphaerae	Phycisphaerales	UBA1924		Al	0.473748	0.000131665	0.0458852
Bacteria	Proteobacteria	Alphaproteobacteria	Caulobacterales	Caulobacteraceae	Brevundimonas	Al	-0.111522	0.396257	0.747177
Bacteria	Bacteroidota	Bacteroidia	Chitinophagales	Chitinophagaceae	Flavisolibacter	Al	-0.248076	0.0559842	0.604602
Bacteria	Proteobacteria	Gammaproteobacteria	Xanthomonadales	Xanthomonadaceae	Arenimonas	Al	-0.129607	0.323651	0.727693
Bacteria	Bacteroidota	Kapabacteria	Kapabacteriales			Al	-0.0260332	0.84348	0.940284
Bacteria	Hydrogenedentota	Hydrogenedentia	Hydrogenedentiales	CAITNO01	SLFT01	Al	-0.0421847	0.748946	0.884482
Bacteria	Proteobacteria	Alphaproteobacteria	Rhizobiales	Xanthobacteraceae	Rhodoplanes	Al	0.0393878	0.765097	0.890271
Bacteria	Myxococcota	Polyangia	Nannocystales	Nannocystaceae	Nannocystis	Al	-0.071991	0.58464	0.830816
Bacteria	Chloroflexota	Chloroflexia	Chloroflexales	Chloroflexaceae	JAAUSQ01	Al	0.281042	0.0296152	0.492729
Bacteria	Chloroflexota					Al	0.0147053	0.911207	0.973445
Bacteria	Myxococcota	Polyangia	Polyangiales	SG8-38		Al	-0.114959	0.381771	0.747177
Bacteria	Proteobacteria	Alphaproteobacteria	Rhizobiales	Phreatobacteraceae	Phreatobacter	Al	-0.213309	0.101751	0.604602
Bacteria	Verrucomicrobiota	Verrucomicrobiae	Opitutales	Opitutaceae	Palsa-1447	Al	-0.0783137	0.551998	0.830816
Bacteria	Myxococcota	UBA4151	UBA4151	UBA4151	CACGMS01	Al	0.136691	0.297675	0.715447
Bacteria	Bacteroidota	Bacteroidia	Flavobacteriales	PHOS-HE28	PHOS-HE28	Al	-0.0796966	0.544976	0.83013
Bacteria	Actinobacteriota	Actinomycetia	Streptosporangiales	Streptosporangiaceae	Actinoallomurus	Al	-0.134612	0.305153	0.718553
Bacteria	Bacteroidota	Bacteroidia	Chitinophagales	LD1	UBA7692	Al	0.100938	0.442855	0.770764
Bacteria	Bacteroidota	Bacteroidia	Cytophagales	Spirosomaceae	Ravibacter	Al	-0.171363	0.190482	0.659437
Bacteria	Sumerlaeota	Sumerlaeia	Sumerlaeales	Sumerlaeaceae		Al	0.110005	0.402753	0.747177
Bacteria	Proteobacteria	Alphaproteobacteria	Rhizobiales	Xanthobacteraceae	Variibacter	Al	-0.0208337	0.874457	0.959837
Bacteria	Dependentiae	Babeliae	Babeliales	Babeliaceae	Babela	Al	-0.281114	0.0295717	0.492729
Bacteria	Proteobacteria	Gammaproteobacteria	Xanthomonadales	Xanthomonadaceae	Lysobacter	Al	-0.0476083	0.717935	0.879439
Bacteria	Verrucomicrobiota	Verrucomicrobiae	Chthoniobacterales	Chthoniobacteraceae	VFJQ01	Al	0.0657658	0.617607	0.83824
Bacteria	Acidobacteriota	Vicinamibacteria	Fen-336	Fen-336	WYBL01	Al	-0.0421447	0.749176	0.884482
Bacteria	Bacteroidota	Bacteroidia				Al	0.0902995	0.492621	0.815184
Bacteria	Firmicutes	Bacilli	Bacillales	DSM-18226		Al	-0.121557	0.354857	0.739886
Bacteria	Patescibacteria	Saccharimonadia	UBA4664	SCTI01	SCTI01	Al	-0.0620407	0.637705	0.849867
Bacteria	Proteobacteria	Gammaproteobacteria	Pseudomonadales	Cellvibrionaceae	Cellvibrio	Al	-0.0161139	0.902741	0.96974
Bacteria	Bacteroidota	Bacteroidia	Flavobacteriales	Flavobacteriaceae	Flavobacterium	Al	0.0500515	0.704109	0.873245
Bacteria	Chlamydiota	Chlamydiia	Chlamydiales	Parachlamydiaceae	Neochlamydia	Al	-0.00268106	0.98378	0.992217
Bacteria	Proteobacteria	Alphaproteobacteria	Rhizobiales	Hyphomicrobiaceae		Al	-0.0439929	0.73856	0.884482
Bacteria	Proteobacteria	Alphaproteobacteria	Rhizobiales	Rhizobiaceae	Neorhizobium	Al	0.0760303	0.563685	0.830816
Bacteria	Proteobacteria	Gammaproteobacteria	Burkholderiales	Burkholderiaceae	Giesbergeria	Al	-0.11543	0.379808	0.747177
Bacteria	Bacteroidota	Bacteroidia	Cytophagales	Spirosomaceae	Emticicia	Al	0.0546039	0.678602	0.856858
Bacteria	Actinobacteriota	Actinomycetia	Actinomycetales	Microbacteriaceae	Frigoribacterium	Al	0.224517	0.0845975	0.604602
Bacteria	Chloroflexota	Anaerolineae	Aggregatilineales	A4b	OLB13	Al	0.12006	0.36086	0.744047
Bacteria	Chloroflexota	Dehalococcoidia	UBA2979	UBA2979	VXMT01	Al	-0.21808	0.0941462	0.604602
Bacteria	Planctomycetota	Phycisphaerae	Tepidisphaerales	Tepidisphaeraceae	Tepidisphaera	Al	-0.272314	0.0352984	0.492729
Bacteria	Proteobacteria	Alphaproteobacteria	Ferrovibrionales	Ferrovibrionaceae	Ferrovibrio	Al	-0.0736793	0.575839	0.830816
Bacteria	Proteobacteria	Alphaproteobacteria	Micavibrionales	Micavibrionaceae		Al	-0.116202	0.376607	0.747177
Bacteria	Actinobacteriota	Actinomycetia	Actinomycetales	Demequinaceae	Demequina	Al	0.033862	0.797295	0.907548
Bacteria	Bacteroidota	Bacteroidia	Chitinophagales	Chitinophagaceae	UBA1930	Al	-0.0247648	0.851017	0.941536
Bacteria	Myxococcota	Polyangia	Polyangiales	Polyangiaceae	Sorangium	Al	-0.167254	0.201494	0.662458
Bacteria	Patescibacteria					Al	0.0884209	0.501701	0.815184
Bacteria	Proteobacteria	Gammaproteobacteria	Burkholderiales	WYBJ01	WYBJ01	Al	-0.145739	0.26653	0.687374
Bacteria	Actinobacteriota	Acidimicrobiia	Acidimicrobiales	JAAYBP01	Aquihabitans	Al	-0.021158	0.872519	0.95922
Bacteria	Proteobacteria	Alphaproteobacteria	Caulobacterales	TH1-2		Al	0.11187	0.394776	0.747177
Bacteria	Bacteroidota	UBA10030	UBA10030	UBA8401	SpSt-333	Al	-0.0156148	0.905739	0.96974
Bacteria	Proteobacteria	Alphaproteobacteria	Rickettsiales			Al	0.226685	0.0815597	0.604602
Bacteria	Chloroflexota	Anaerolineae	Anaerolineales	UBA6663	SpSt-583	Al	-0.144487	0.270706	0.690019
Bacteria	Chloroflexota	Chloroflexia	Chloroflexales	Roseiflexaceae	SDU3-3	Al	-0.14907	0.255637	0.684315
Bacteria	Planctomycetota	Brocadiae	Brocadiales			Al	-0.101396	0.44078	0.770764
Bacteria	Proteobacteria	Gammaproteobacteria	Burkholderiales	Casimicrobiaceae	VBCG01	Al	0.0938754	0.475575	0.804553
Bacteria	Verrucomicrobiota	Verrucomicrobiae	Chthoniobacterales	Chthoniobacteraceae		Al	0.0248115	0.85074	0.941536
Bacteria	Verrucomicrobiota	Verrucomicrobiae	Chthoniobacterales	UBA10450	Udaeobacter	Al	0.0587283	0.655797	0.852121
Bacteria	Actinobacteriota	Actinomycetia	Sporichthyales	Sporichthyaceae	Sporichthya	Al	0.164876	0.208068	0.667208
Bacteria	Bacteroidota	Bacteroidia	Chitinophagales	Chitinophagaceae	Heliimonas	Al	-0.272245	0.0353464	0.492729
Bacteria	Acidobacteriota	Blastocatellia	Pyrinomonadales			Al	-0.146446	0.264192	0.684627
Bacteria	Chloroflexota	Ktedonobacteria	Ktedonobacterales	Ktedonobacteraceae	CF-154	Al	0.184505	0.158169	0.643619
Bacteria	Proteobacteria	Alphaproteobacteria	Rhizobiales	Methyloligellaceae	Methyloceanibacter	Al	0.276464	0.0324926	0.492729
Bacteria	Bacteroidota	Bacteroidia	Chitinophagales	Chitinophagaceae	Puia	Al	0.128921	0.32624	0.728813
Bacteria	Bacteroidota	Bacteroidia	Sphingobacteriales	Sphingobacteriaceae	Daejeonella	Al	-0.0140717	0.915018	0.973445
Bacteria	Bacteroidota	Kapabacteria	OLB7	OLB7	OLB7	Al	0.101626	0.439736	0.770764
Bacteria	Patescibacteria	Paceibacteria	UBA9983	PALSA-1337	C7867-002	Al	0.207395	0.11183	0.604602
Bacteria	Proteobacteria	Alphaproteobacteria	Caulobacterales	TH1-2	VFBF01	Al	0.284115	0.0278068	0.492729
Bacteria	Proteobacteria	Alphaproteobacteria	Rhodospirillales	Magnetospirillaceae		Al	0.101393	0.440792	0.770764
Bacteria	Proteobacteria	Gammaproteobacteria	DSM-16500	DSM-16500		Al	0.19966	0.126148	0.61954
Bacteria	Bacteroidota	Bacteroidia	Cytophagales	Spirosomaceae	Leadbetterella	Al	-0.0879889	0.503801	0.815184
Bacteria	Chloroflexota	Anaerolineae	Aggregatilineales	J027	JAAUUD01	Al	-0.0794472	0.546239	0.83013
Bacteria	Chloroflexota	Dehalococcoidia	Tepidiformales	Tepidiformaceae	Tepidiforma	Al	0.142644	0.276928	0.696818
Bacteria	Firmicutes	Bacilli	Thermoactinomycetales	DSM-44946	Planifilum	Al	0.201426	0.122763	0.61954
Bacteria	Chlamydiota	Chlamydiia	Chlamydiales	Parachlamydiaceae		Al	-0.0827594	0.529581	0.829478
Bacteria	Chloroflexota	Chloroflexia	Chloroflexales	Herpetosiphonaceae	Herpetosiphon	Al	0.0453276	0.730924	0.884482
Bacteria	Proteobacteria	Alphaproteobacteria	Rs-D84			Al	-0.0601289	0.648122	0.852121
Bacteria	Verrucomicrobiota	Verrucomicrobiae	Chthoniobacterales	Xiphinematobacteraceae	Xiphinematobacter	Al	-0.212444	0.103179	0.604602
Bacteria	Verrucomicrobiota	Verrucomicrobiae	Opitutales	Opitutaceae	IMCC26134	Al	0.212232	0.103533	0.604602
Bacteria	Verrucomicrobiota	Verrucomicrobiae	Verrucomicrobiales	Akkermansiaceae		Al	0.108006	0.411406	0.748695
Bacteria	Actinobacteriota	Thermoleophilia	Gaiellales	Gaiellaceae	Gaiella	Al	0.135874	0.300602	0.717191
Bacteria	Firmicutes	Bacilli	Tumebacillales	Tumebacillaceae	Tumebacillus	Al	-0.182298	0.163292	0.647397
Bacteria	Proteobacteria	Alphaproteobacteria	Dongiales	Dongiaceae	Hypericibacter	Al	-0.0670864	0.610548	0.8377
Bacteria	Acidobacteriota	Acidobacteriae	Acidobacteriales	Koribacteraceae	TOLSYN	Al	0.25668	0.0477352	0.556914
Bacteria	Bacteroidota	Bacteroidia	Chitinophagales	Chitinophagaceae	Nemorincola	Al	0.178876	0.171475	0.656884
Bacteria	Bdellovibrionota	Oligoflexia	Oligoflexales	Oligoflexaceae	Oligoflexus	Al	-0.159895	0.22233	0.676499
Bacteria	Chloroflexota	Dehalococcoidia				Al	0.113848	0.386419	0.747177
Bacteria	Patescibacteria	ABY1	Magasanikbacterales	GWA2-37-8	XYD2-FULL-39-9	Al	-0.20638	0.113634	0.604602
Bacteria	Proteobacteria	Alphaproteobacteria	Rhodospirillales	UXAT02	Defluviicoccus	Al	-0.231251	0.0754427	0.604602
Bacteria	Proteobacteria	Alphaproteobacteria	Sphingomonadales	Kordiimonadaceae	Kordiimonas	Al	0.0865302	0.510927	0.815184
Bacteria	Verrucomicrobiota	Verrucomicrobiae	Verrucomicrobiales	Akkermansiaceae	Haloferula	Al	-0.100805	0.443461	0.770764
Bacteria	Verrucomicrobiota	Verrucomicrobiae	Verrucomicrobiales	Akkermansiaceae	Luteolibacter	Al	0.222384	0.0876736	0.604602
Bacteria	Acidobacteriota	Acidobacteriae	Bryobacterales	Bryobacteraceae	Bryobacter	Al	-0.0503148	0.702625	0.872958
Bacteria	Actinobacteriota	Thermoleophilia	Solirubrobacterales	70-9	67-14	Al	-0.0803348	0.54175	0.83013
Bacteria	Actinobacteriota	Thermoleophilia	Solirubrobacterales	Solirubrobacteraceae	Solirubrobacter	Al	-0.210848	0.105857	0.604602
Bacteria	Bacteroidota	Bacteroidia	Chitinophagales	Chitinophagaceae	Terrimonas	Al	-0.0768344	0.559557	0.830816
Bacteria	Chloroflexota	Dehalococcoidia	UBA2979	UBA2979	W-Chloroflexi-9	Al	0.151022	0.249394	0.681677
Bacteria	Firmicutes	Bacilli	Paenibacillales			Al	-0.131537	0.316435	0.721517
Bacteria	Myxococcota	Polyangia	Polyangiales	Polyangiaceae	MWCO01	Al	-0.173029	0.186142	0.659437
Bacteria	Proteobacteria	Alphaproteobacteria	DSM-16000	Inquilinaceae	Inquilinus	Al	0.102236	0.436983	0.770764
Bacteria	Proteobacteria	Alphaproteobacteria	Rhizobiales	Aestuariivirgaceae	Nordella	Al	-0.212044	0.103845	0.604602
Bacteria	Proteobacteria	Gammaproteobacteria	Burkholderiales	Methylophilaceae	Methylophilus	Al	-0.260101	0.0447452	0.537714
Bacteria	Acidobacteriota	Acidobacteriae	Acidobacteriales	Acidobacteriaceae	Terracidiphilus	Al	-0.0509251	0.699188	0.870239
Bacteria	Actinobacteriota	Actinomycetia	Mycobacteriales			Al	-0.121237	0.356134	0.739886
Bacteria	Deinococcota	Deinococci	Deinococcales	Trueperaceae	CSSed10-48	Al	0.168989	0.19679	0.659437
Bacteria	Planctomycetota	Planctomycetia	Pan216	Pan216	Pan216	Al	0.193263	0.139006	0.627736
Bacteria	Planctomycetota	UBA1135	UBA1135	GCA-002686595	WYBT01	Al	-0.0375227	0.775923	0.89688
Bacteria	Proteobacteria	Alphaproteobacteria	Minwuiales	Minwuiaceae	Minwuia	Al	-0.0114372	0.930885	0.978167
Bacteria	Proteobacteria	Alphaproteobacteria	Sphingomonadales			Al	0.0723431	0.5828	0.830816
Bacteria	Acidobacteriota	Blastocatellia	Pyrinomonadales	Pyrinomonadaceae	PSRF01	Al	0.2401	0.0646288	0.604602
Bacteria	Bacteroidota	Ignavibacteria	SJA-28	B-1AR	UBA2330	Al	-0.138992	0.28954	0.700726
Bacteria	Bdellovibrionota	FAC87	UBA2466	UBA2466		Al	0.0892557	0.497655	0.815184
Bacteria	Chloroflexota	Anaerolineae	Aggregatilineales	A4b	GCA-2699585	Al	-0.0144918	0.912491	0.973445
Bacteria	Chloroflexota	Anaerolineae	Anaerolineales	EnvOPS12	OLB14	Al	-0.220501	0.0904612	0.604602
Bacteria	Proteobacteria	Alphaproteobacteria	Rhizobiales	Rhizobiaceae	Aquamicrobium	Al	-0.0554816	0.673724	0.853792
Bacteria	Proteobacteria					Al	0.156637	0.232018	0.676499
Bacteria	Acidobacteriota	Acidobacteriae	Acidobacteriales	SbA1	Sulfotelmatobacter	Al	0.00436929	0.973569	0.99198
Bacteria	Planctomycetota	Planctomycetia	Pirellulales	Lacipirellulaceae	Posidoniimonas	Al	0.219067	0.0926295	0.604602
Bacteria	Acidobacteriota	Acidobacteriae	Acidobacteriales	Acidobacteriaceae	Silvibacterium	Al	0.18342	0.160674	0.643619
Bacteria	Bdellovibrionota	Bdellovibrionia	Bdellovibrionales			Al	0.132823	0.311685	0.721517
Bacteria	Gemmatimonadota	Gemmatimonadetes	Gemmatimonadales	GWC2-71-9	JABFSM01	Al	0.0293642	0.823756	0.926078
Bacteria	Nitrospirota	Nitrospiria	Nitrospirales	Nitrospiraceae	Nitrospira	Al	-0.10829	0.410171	0.748695
Bacteria	Proteobacteria	Alphaproteobacteria	Caulobacterales	TH1-2	Terricaulis	Al	-0.180182	0.168317	0.655402
Bacteria	Proteobacteria	Alphaproteobacteria	RUG11792	RUG11792	RUG11420	Al	0.264049	0.0414874	0.51637
Bacteria	Proteobacteria	Alphaproteobacteria	Rhodobacterales	Rhodobacteraceae	Poseidonocella	Al	-0.00243507	0.985268	0.992217
Bacteria	Proteobacteria	Gammaproteobacteria	Burkholderiales	Burkholderiaceae	Hydrogenophaga	Al	-0.0772811	0.557269	0.830816
Bacteria	Actinobacteriota	Actinomycetia	Streptosporangiales	Streptosporangiaceae	Thermostaphylospora	Al	-0.0114358	0.930893	0.978167
Bacteria	Chlamydiota	Chlamydiia	Chlamydiales	Rhabdochlamydiaceae	Ga0074140	Al	0.183716	0.159986	0.643619
Bacteria	Chloroflexota	Chloroflexia	Thermomicrobiales	Thermomicrobiaceae	Sphaerobacter	Al	-0.00367833	0.977748	0.99198
Bacteria	Dependentiae	Babeliae	Babeliales			Al	0.122608	0.350682	0.738445
Bacteria	Patescibacteria	Gracilibacteria	Peribacterales	Peribacteraceae	VMFU01	Al	0.0489823	0.710148	0.873793
Bacteria	Patescibacteria	Saccharimonadia	Saccharimonadales	UBA4665	GCA-2746885	Al	-0.114764	0.382582	0.747177
Bacteria	Proteobacteria	Alphaproteobacteria	Reyranellales	Reyranellaceae	SYSU-D60007	Al	0.126241	0.336483	0.733222
Bacteria	Proteobacteria	Gammaproteobacteria	Steroidobacterales	Steroidobacteraceae	Povalibacter	Al	-0.0614958	0.640667	0.852121
Bacteria	Actinobacteriota	Actinomycetia	Mycobacteriales	Micromonosporaceae		Al	-0.043331	0.742356	0.884482
Bacteria	Bacteroidota	Bacteroidia	Chitinophagales	Chitinophagaceae	Foetidibacter	Al	-0.229788	0.0773609	0.604602
Bacteria	Proteobacteria	Gammaproteobacteria	Methylococcales	Methylococcaceae	Methylocaldum	Al	0.133597	0.308849	0.721517
Bacteria	Actinobacteriota	Actinomycetia	Actinomycetales	Microbacteriaceae	Leucobacter	Al	0.0413463	0.753776	0.884482
Bacteria	Armatimonadota	Fimbriimonadia	Fimbriimonadales	Fimbriimonadaceae		Al	0.0679756	0.605814	0.8377
Bacteria	Bacteroidota	Bacteroidia	Chitinophagales	Saprospiraceae		Al	0.28279	0.0285746	0.492729
Bacteria	Cyanobacteria	Cyanobacteriia	Cyanobacteriales	Coleofasciculaceae	SIO2C1	Al	0.130723	0.319466	0.722948
Bacteria	Planctomycetota	Planctomycetia	Pirellulales	Lacipirellulaceae	Bythopirellula	Al	0.0418122	0.751091	0.884482
Bacteria	Planctomycetota	Planctomycetia	Pirellulales	Lacipirellulaceae	Lacipirellula	Al	0.241089	0.063502	0.604602
Bacteria	Planctomycetota	Planctomycetia	Planctomycetales			Al	-0.0912227	0.48819	0.815184
Bacteria	Acidobacteriota	Blastocatellia	UBA7656	UBA7656	QHVH01	Al	-0.0428703	0.745002	0.884482
Bacteria	Actinobacteriota	Actinomycetia	Nitriliruptorales	Nitriliruptoraceae	CSBr16-57R1	Al	0.091718	0.485821	0.815184
Bacteria	Armatimonadota	Fimbriimonadia	Fimbriimonadales	Fimbriimonadaceae	55-13	Al	0.1844	0.15841	0.643619
Bacteria	Bdellovibrionota	Bdellovibrionia	Bdellovibrionales	Bdellovibrionaceae	Ga0074137	Al	-0.00295794	0.982105	0.992217
Bacteria	Bdellovibrionota	UBA2361	UBA2361	RFPC01	RFPC01	Al	0.0569406	0.665645	0.852121
Bacteria	Elusimicrobiota	Elusimicrobia				Al	-0.0030898	0.981307	0.992217
Bacteria	Fibrobacterota	Chitinivibrionia	Chitinivibrionales	Chitinispirillaceae	Chitinispirillum	Al	0.275434	0.033171	0.492729
Bacteria	Firmicutes	Symbiobacteriia	Symbiobacteriales	Symbiobacteriaceae	Symbiobacterium	Al	-0.0654807	0.619136	0.83824
Bacteria	Patescibacteria	ABY1	SG8-24	2-12-FULL-60-25	SZUA-46	Al	0.0793049	0.546961	0.83013
Bacteria	Patescibacteria	Doudnabacteria	UBA920	O2-02-FULL-48-8	O2-12-FULL-42-9	Al	-0.268474	0.0380712	0.504551
Bacteria	Proteobacteria	Alphaproteobacteria	Acetobacterales	Acetobacteraceae	Roseomonas	Al	0.0413463	0.753776	0.884482
Bacteria	Proteobacteria	Gammaproteobacteria	Pseudomonadales	Porticoccaceae	SZUA-272	Al	-0.26758	0.0387416	0.504551
Bacteria	Verrucomicrobiota	Verrucomicrobiae	Pedosphaerales			Al	-0.162451	0.214928	0.667208
Bacteria	Chlamydiota	Chlamydiia	Chlamydiales	Parachlamydiaceae	Rubidus	Al	0.176183	0.178122	0.656884
Bacteria	Proteobacteria	Alphaproteobacteria	Reyranellales	Reyranellaceae		Al	0.170733	0.19214	0.659437
Bacteria	Acidobacteriota	Acidobacteriae	Acidobacteriales	Acidobacteriaceae		Al	0.0864513	0.511314	0.815184
Bacteria	Acidobacteriota	UBA6911	UBA6911	UBA6911	Gp18-AA60	Al	0.069697	0.596696	0.83703
Bacteria	Actinobacteriota	Acidimicrobiia	Acidimicrobiales	Ilumatobacteraceae		Al	0.0750583	0.568695	0.830816
Bacteria	Bacteroidota	Bacteroidia	Cytophagales	Spirosomaceae	Persicitalea	Al	-0.153311	0.242205	0.676551
Bacteria	Bacteroidota	Bacteroidia	Flavobacteriales	Flavobacteriaceae	Aequorivita	Al	0.293831	0.0226859	0.492729
Bacteria	Chloroflexota	Anaerolineae	Anaerolineales	UBA11579	OMJR01	Al	-0.103381	0.43184	0.770764
Bacteria	Chloroflexota	Dehalococcoidia	UBA2985	UBA2985	VEXC01	Al	-0.0338288	0.797489	0.907548
Bacteria	Desulfobacterota	DSM-4660	Desulfatiglandales	HGW-15		Al	0.240867	0.063754	0.604602
Bacteria	Firmicutes	Halanaerobiia	Halanaerobiales			Al	-0.00687936	0.958396	0.99198
Bacteria	Planctomycetota	Phycisphaerae	Phycisphaerales	SM1A02	UBA966	Al	0.0644713	0.624561	0.842909
Bacteria	Proteobacteria	Alphaproteobacteria	ATCC43930	Stellaceae	URHD0088	Al	-0.0268065	0.838892	0.939574
Bacteria	Actinobacteriota	Acidimicrobiia	UBA5794	UBA5794	SZUA-442	Al	-0.121103	0.356674	0.739886
Bacteria	Desulfobacterota	Binatia	UBA9968	UBA9968		Al	0.200305	0.124902	0.61954
Bacteria	Firmicutes	Sulfobacillia	Sulfobacillales	Sulfobacillaceae		Al	-0.136388	0.298759	0.715584
Bacteria	Patescibacteria	UBA1384				Al	0.167606	0.200532	0.66242
Bacteria	Planctomycetota	UBA8108	UBA1146			Al	0.0199203	0.87992	0.962149
Bacteria	Proteobacteria	Alphaproteobacteria	Azospirillales	Azospirillaceae	Indioceanicola	Al	0.00544446	0.967068	0.99198
Bacteria	Proteobacteria	Alphaproteobacteria	Paracaedibacterales	UBA11393	Finniella	Al	0.0382097	0.771931	0.895294
Bacteria	Proteobacteria	Alphaproteobacteria	UBA9219	UBA9219	UBA8914	Al	-0.153181	0.242611	0.676551
Bacteria	Proteobacteria	Gammaproteobacteria	Burkholderiales	SG8-39	VBDM01	Al	-0.043335	0.742334	0.884482
Bacteria	Proteobacteria	Gammaproteobacteria	Methylococcales	Methylococcaceae		Al	0.0673936	0.60891	0.8377
Bacteria	Actinobacteriota	Actinomycetia	Propionibacteriales	Nocardioidaceae		Al	0.109004	0.407075	0.747177
Bacteria	Firmicutes	Bacilli	Bacillales	DSM-18226	Bacillus	Al	0.184179	0.158919	0.643619
Bacteria	Firmicutes	UBA4882	UBA8346	UBA8346	Hydrogenispora	Al	0.109087	0.406715	0.747177
Bacteria	Proteobacteria	Gammaproteobacteria	Nevskiales	Nevskiaceae	Alkanibacter	Al	-0.123114	0.348684	0.736462
Bacteria	Actinobacteriota	Actinomycetia	Mycobacteriales	Micromonosporaceae	Micromonospora	Al	-0.139074	0.289254	0.700726
Bacteria	Armatimonadota	Armatimonadia	Armatimonadales	Capsulimonadaceae	Capsulimonas	Al	-0.0214452	0.870803	0.958847
Bacteria	Bacteroidota	Bacteroidia	Cytophagales	Cyclobacteriaceae	Imperialibacter	Al	0.00491383	0.970276	0.99198
Bacteria	Bdellovibrionota	Bdellovibrionia	UBA1018	UBA923	UBA923	Al	0.124039	0.345046	0.733222
Bacteria	Chloroflexota	Dehalococcoidia	UBA2979	UBA2979	SURF-43	Al	0.154109	0.239735	0.676499
Bacteria	Chloroflexota	Limnocylindria	QHBO01	QHBO01	CF-167	Al	0.00183935	0.988872	0.992873
Bacteria	Dependentiae	Babeliae	Babeliales	Vermiphilaceae		Al	0.225175	0.0836664	0.604602
Bacteria	Gemmatimonadota	Gemmatimonadetes	Gemmatimonadales	GWC2-71-9		Al	-0.206731	0.113007	0.604602
Bacteria	Hydrogenedentota	Hydrogenedentia	Hydrogenedentiales			Al	0.0360753	0.784355	0.903628
Bacteria	Proteobacteria	Alphaproteobacteria	Micavibrionales	Micavibrionaceae	Micavibrio	Al	0.0949838	0.470357	0.803526
Bacteria	Proteobacteria	Alphaproteobacteria	Rhizobiales	Kaistiaceae		Al	-0.0789338	0.548844	0.83013
Bacteria	Proteobacteria	Alphaproteobacteria	Rickettsiales	Anaplasmataceae		Al	-0.198318	0.128767	0.61954
Bacteria	Proteobacteria	Gammaproteobacteria	Coxiellales	Coxiellaceae		Al	-0.231218	0.0754856	0.604602
Bacteria	Proteobacteria	Gammaproteobacteria	Methylococcales	Methylococcaceae	UBA6136	Al	0.125973	0.337518	0.733222
Bacteria	Verrucomicrobiota	Verrucomicrobiae	Opitutales	Opitutaceae		Al	-0.0427997	0.745408	0.884482
Bacteria	Actinobacteriota	Acidimicrobiia	Acidimicrobiales			Al	0.176183	0.178122	0.656884
Bacteria	Actinobacteriota	Thermoleophilia	Gaiellales	Gaiellaceae		Al	-0.221766	0.0885801	0.604602
Bacteria	Bacteroidota	Bacteroidia	Chitinophagales	Saprospiraceae	Lewinella	Al	0.206731	0.113007	0.604602
Bacteria	Bacteroidota	Kapabacteria	Kapabacteriales	UBA2268	PGYR01	Al	0.123471	0.347276	0.735718
Bacteria	Chlamydiota	Chlamydiia	Chlamydiales	Parachlamydiaceae	Protochlamydia	Al	-0.113672	0.387158	0.747177
Bacteria	Chloroflexota	Anaerolineae	Anaerolineales	UBA4823	UTCFX2	Al	-0.0758516	0.564605	0.830816
Bacteria	Chloroflexota	Chloroflexia				Al	0.102744	0.434698	0.770764
Bacteria	Deinococcota	Deinococci	Deinococcales	Deinococcaceae	Deinococcus	Al	0.148576	0.257232	0.684315
Bacteria	Eremiobacterota	Eremiobacteria	Baltobacterales	Baltobacteraceae		Al	-0.0488638	0.710819	0.873793
Bacteria	Firmicutes	Bacilli	Bacillales	DSM-18226	Robertmurraya	Al	0.0563813	0.668738	0.852121
Bacteria	Firmicutes	Bacilli	Paenibacillales	Paenibacillaceae		Al	-0.0593233	0.652533	0.852121
Bacteria	Firmicutes	Clostridia	Lachnospirales	Lachnospiraceae		Al	-0.037817	0.774212	0.896389
Bacteria	Myxococcota	WYAZ01	WYAZ01	WYAZ01	WYAZ01	Al	-0.0167748	0.898772	0.969728
Bacteria	Nitrospirota	Nitrospiria	Nitrospirales	Nitrospiraceae	Palsa-1315	Al	0.176661	0.176928	0.656884
Bacteria	Patescibacteria	Paceibacteria	UBA9983	UBA6065	UBA6065	Al	0.111979	0.394311	0.747177
Bacteria	Patescibacteria	Paceibacteria	UBA9983	Zambryskibacteraceae	C7867-005	Al	0.198697	0.128023	0.61954
Bacteria	Planctomycetota	B15-G4	B15-G4	B15-G4	B15-G4	Al	0.0550348	0.676205	0.855381
Bacteria	Planctomycetota	Planctomycetia	Pirellulales	UBA1268		Al	0.116026	0.377337	0.747177
Bacteria	Proteobacteria	Alphaproteobacteria	Geminicoccales	Geminicoccaceae		Al	0.273566	0.0344311	0.492729
Bacteria	Proteobacteria	Alphaproteobacteria	Rhizobiales	Stappiaceae	Pseudovibrio	Al	-0.221766	0.0885801	0.604602
Bacteria	Proteobacteria	Alphaproteobacteria	Rhizobiales			Al	0.0413463	0.753776	0.884482
Bacteria	Proteobacteria	Alphaproteobacteria	Rhodospirillales	Rhodospirillaceae	GCA-2737725	Al	-0.0563813	0.668738	0.852121
Bacteria	Proteobacteria	Gammaproteobacteria	Berkiellales			Al	0.191696	0.142299	0.627736
Bacteria	Proteobacteria	Gammaproteobacteria	Burkholderiales	Burkholderiaceae	Cupriavidus	Al	0.184179	0.158919	0.643619
Bacteria	Proteobacteria	Gammaproteobacteria	Burkholderiales			Al	0.0253732	0.8474	0.941536
Bacteria	Proteobacteria	Gammaproteobacteria	Steroidobacterales	Steroidobacteraceae	Steroidobacter	Al	-0.0864513	0.511314	0.815184
Bacteria	Proteobacteria	Gammaproteobacteria	VBWC01	VBWC01	VBWC01	Al	-0.129814	0.322871	0.727693
Bacteria	Verrucomicrobiota	Verrucomicrobiae	Chthoniobacterales			Al	-0.0197446	0.880971	0.962149
Bacteria	Verrucomicrobiota	Verrucomicrobiae	Opitutales			Al	-0.048338	0.713796	0.875908
Bacteria	Acidobacteriota	Blastocatellia	Pyrinomonadales	Blastocatellaceae	Aridibacter	Al	-0.169144	0.196373	0.659437
Bacteria	Actinobacteriota	Actinomycetia	Mycobacteriales	Mycobacteriaceae	Rhodococcus	Al	0.0789338	0.548844	0.83013
Bacteria	Actinobacteriota	UBA4738	UBA4738	HRBIN12	AC-51	Al	0.176661	0.176928	0.656884
Bacteria	Armatimonadota	Armatimonadia	Armatimonadales	Armatimonadaceae	Armatimonas	Al	0.193007	0.139539	0.627736
Bacteria	Bacteroidota	Bacteroidia	Chitinophagales	Chitinophagaceae	Ferruginibacter	Al	-0.169144	0.196373	0.659437
Bacteria	Bacteroidota	Bacteroidia	Chitinophagales	Chitinophagaceae	VBAR01	Al	0.191696	0.142299	0.627736
Bacteria	Bacteroidota					Al	-0.154109	0.239735	0.676499
Bacteria	Chlamydiota	Chlamydiia	Chlamydiales			Al	-0.139394	0.288134	0.700726
Bacteria	Chloroflexota	Anaerolineae	Aggregatilineales			Al	-0.169144	0.196373	0.659437
Bacteria	Chloroflexota	Anaerolineae	UBA4142	UBA4142	UBA4142	Al	0.00982765	0.940593	0.984374
Bacteria	Chloroflexota	Dehalococcoidia	DSGV01	DSGV01	DSGV01	Al	0.0563813	0.668738	0.852121
Bacteria	Cyanobacteria	Cyanobacteriia	GCF-001939115	GCF-001939115	GCF-001939115	Al	0.131556	0.316364	0.721517
Bacteria	Deinococcota	Deinococci	Deinococcales	Trueperaceae	JAABTL01	Al	-0.0542239	0.680718	0.857975
Bacteria	Desulfobacterota	Binatia	Bin18	Bin18	JABFSC01	Al	-0.0864513	0.511314	0.815184
Bacteria	Desulfobacterota	Binatia	HRBIN30	HRBIN30	HRBIN30	Al	0.0536131	0.684124	0.860712
Bacteria	Eisenbacteria	RBG-16-71-46	RBG-16-71-46	RBG-16-71-46	RBG-16-71-46	Al	0.191696	0.142299	0.627736
Bacteria	Elusimicrobiota	Elusimicrobia	UBA1565	UBA9628	GWA2-66-18	Al	-0.0321678	0.807237	0.91219
Bacteria	Eremiobacterota	Xenobia	Xenobiales			Al	-0.0300917	0.819461	0.924215
Bacteria	Firmicutes	Bacilli	Alicyclobacillales	Alicyclobacillaceae		Al	0.0488638	0.710819	0.873793
Bacteria	Firmicutes	Bacilli	Thermoactinomycetales	Thermoactinomycetaceae	Thermoflavimicrobium	Al	-0.206731	0.113007	0.604602
Bacteria	Gemmatimonadota	Gemmatimonadetes	Gemmatimonadales	Gemmatimonadaceae	SCN-70-22	Al	0.206731	0.113007	0.604602
Bacteria	Myxococcota	UBA9042	UBA9042			Al	0.0789338	0.548844	0.83013
Bacteria	Patescibacteria	Paceibacteria	UBA9983	SBAW01	GWA1-54-10	Al	0.273427	0.0345268	0.492729
Bacteria	Patescibacteria	Paceibacteria	UBA9983	XYD1-FULL-46-19		Al	0.186657	0.15329	0.643619
Bacteria	Planctomycetota	Phycisphaerae	Phycisphaerales	UBA1924	UBA6054	Al	0.0857809	0.514607	0.815184
Bacteria	Proteobacteria	Alphaproteobacteria	Azospirillales	Azospirillaceae		Al	0.0671854	0.61002	0.8377
Bacteria	Proteobacteria	Alphaproteobacteria	Micropepsales			Al	-0.101865	0.438658	0.770764
Bacteria	Proteobacteria	Alphaproteobacteria	Paracaedibacterales	Paracaedibacteraceae		Al	0.0321678	0.807237	0.91219
Bacteria	Proteobacteria	Alphaproteobacteria	Rhizobiales	Beijerinckiaceae	Chelatococcus	Al	-0.199214	0.127014	0.61954
Bacteria	Proteobacteria	Alphaproteobacteria	Rhodobacterales	Rhodobacteraceae	Amaricoccus	Al	0.193007	0.139539	0.627736
Bacteria	Proteobacteria	Gammaproteobacteria	Burkholderiales	Burkholderiaceae	Comamonas	Al	0.0413463	0.753776	0.884482
Bacteria	Proteobacteria	Gammaproteobacteria	Burkholderiales	Rhodocyclaceae		Al	-0.116521	0.375289	0.747177
Bacteria	Verrucomicrobiota	Kiritimatiellae	SLAD01	WLWN01	WLWN01	Al	-0.155609	0.235136	0.676499
Bacteria	Acidobacteriota	Acidobacteriae	20CM-2-55-15	20CM-2-55-15	DSPE01	Al	0.268116	0.0383382	0.504551
Bacteria	Acidobacteriota	Mor1	Mor1	Mor1	Mor1	Al	0.00375875	0.977261	0.99198
Bacteria	Actinobacteriota	Actinomycetia	Mycobacteriales	Mycobacteriaceae		Al	-0.165462	0.206434	0.667067
Bacteria	Actinobacteriota	Thermoleophilia	Gaiellales	Gaiellaceae	GMQP-bins7	Al	0.00375875	0.977261	0.99198
Bacteria	Actinobacteriota	Thermoleophilia	Miltoncostaeales	Miltoncostaeaceae	Miltoncostaea	Al	0.154109	0.239735	0.676499
Bacteria	Bacteroidota	Bacteroidia	Chitinophagales	Saprospiraceae	UBA2329	Al	0.0714163	0.58765	0.830816
Bacteria	Bacteroidota	Bacteroidia	Cytophagales	Hymenobacteraceae	Adhaeribacter	Al	0.00375875	0.977261	0.99198
Bacteria	Bacteroidota	Bacteroidia	Flavobacteriales	Flavobacteriaceae		Al	0.0638988	0.627646	0.842909
Bacteria	Bacteroidota	Bacteroidia	Flavobacteriales	Weeksellaceae	Kaistella	Al	-0.0554816	0.673724	0.853792
Bacteria	Bacteroidota	Ignavibacteria	Ignavibacteriales	Ignavibacteriaceae		Al	-0.0356476	0.786851	0.905008
Bacteria	Bdellovibrionota	Bdellovibrionia	Bdellovibrionales	Bdellovibrionaceae		Al	0.247031	0.05706	0.604602
Bacteria	Bdellovibrionota	Oligoflexia	Silvanigrellales	Silvanigrellaceae	Silvanigrella	Al	-0.0714163	0.58765	0.830816
Bacteria	Chloroflexota	Anaerolineae	Promineofilales	Promineofilaceae	Promineofilum	Al	0.0579831	0.659895	0.852121
Bacteria	Deinococcota	Deinococci	Deinococcales	Trueperaceae	Truepera	Al	-0.181454	0.165283	0.650861
Bacteria	Dependentiae	Babeliae	Babeliales	GWF2-32-72	GWF2-32-72	Al	0.110159	0.402091	0.747177
Bacteria	Desulfobacterota	Syntrophobacteria	Syntrophobacterales	Syntrophobacteraceae	Desulfovirga	Al	-0.0864513	0.511314	0.815184
Bacteria	Firmicutes	Bacilli	Thermoactinomycetales	DSM-45169		Al	0.199214	0.127014	0.61954
Bacteria	Firmicutes	Clostridia	Peptostreptococcales			Al	0.131556	0.316364	0.721517
Bacteria	Firmicutes	Desulfotomaculia	Desulfotomaculales			Al	0.131556	0.316364	0.721517
Bacteria	Firmicutes	Limnochordia	Limnochordales	ZCTH02-B6	ZCTH02-B6	Al	-0.0864513	0.511314	0.815184
Bacteria	Firmicutes	Limnochordia				Al	-0.124039	0.345046	0.733222
Bacteria	Firmicutes	UBA4882	UBA10575	UBA10575	Capillibacterium	Al	-0.0112763	0.931855	0.978167
Bacteria	Gemmatimonadota	Gemmatimonadetes	Longimicrobiales	UBA6960	UBA2982	Al	0.206731	0.113007	0.604602
Bacteria	Myxococcota	Polyangia	Polyangiales	Polyangiaceae	Polyangium	Al	0.124039	0.345046	0.733222
Bacteria	Myxococcota	UBA9160	UBA9160	PR03	CAADGG01	Al	0.184179	0.158919	0.643619
Bacteria	Nitrospirota	Nitrospiria	Nitrospirales	Nitrospiraceae	40CM-3-62-11	Al	0.0714163	0.58765	0.830816
Bacteria	Patescibacteria	Paceibacteria	UBA9983	UBA918		Al	0.295187	0.0220393	0.492729
Bacteria	Patescibacteria	Paceibacteria	UBA9983	Zambryskibacteraceae	UBA910	Al	-0.0725459	0.581741	0.830816
Bacteria	Patescibacteria	Saccharimonadia	Saccharimonadales	UBA1020	UBA1020	Al	-0.169482	0.195466	0.659437
Bacteria	Patescibacteria	Saccharimonadia	Saccharimonadales	UBA4665	UBA4665	Al	-0.161626	0.217297	0.667208
Bacteria	Planctomycetota	Phycisphaerae	UBA1845	UTPLA1	ECT2AJA-110-A	Al	0.0726353	0.581274	0.830816
Bacteria	Planctomycetota	Planctomycetia	Gemmatales	Gemmataceae	Fimbriiglobus	Al	0.154109	0.239735	0.676499
Bacteria	Planctomycetota	Planctomycetia	Planctomycetales	Planctomycetaceae	MB-PLM-1	Al	0.0638988	0.627646	0.842909
Bacteria	Proteobacteria	Alphaproteobacteria	Acetobacterales	Acetobacteraceae	Acidisoma	Al	-0.214249	0.100217	0.604602
Bacteria	Proteobacteria	Alphaproteobacteria	Holosporales	Holosporaceae		Al	-0.203432	0.119	0.618979
Bacteria	Proteobacteria	Alphaproteobacteria	Kiloniellales			Al	0.109004	0.407075	0.747177
Bacteria	Proteobacteria	Alphaproteobacteria	Rhizobiales	Labraceae	Labrys	Al	0.214249	0.100217	0.604602
Bacteria	Sumerlaeota	Sumerlaeia	Sumerlaeales			Al	0.124039	0.345046	0.733222
Bacteria	Verrucomicrobiota	Verrucomicrobiae	Chthoniobacterales	UBA10450		Al	0.0714163	0.58765	0.830816
Bacteria	Acidobacteriota	Acidobacteriae				Al	0.184179	0.158919	0.643619
Bacteria	Acidobacteriota	Blastocatellia	Pyrinomonadales	Blastocatellaceae	Stenotrophobacter	Al	0.0789338	0.548844	0.83013
Bacteria	Acidobacteriota	Blastocatellia	Pyrinomonadales	Blastocatellaceae		Al	-0.116521	0.375289	0.747177
Bacteria	Acidobacteriota	Thermoanaerobaculia	UBA5066	Gp7-AA6	Gp7-AA6	Al	0.0563813	0.668738	0.852121
Bacteria	Actinobacteriota	Actinomycetia	Mycobacteriales	Geodermatophilaceae	Modestobacter	Al	-0.0714163	0.58765	0.830816
Bacteria	Bacteroidota	Bacteroidia	AKYH767	B-17BO		Al	0.206731	0.113007	0.604602
Bacteria	Bacteroidota	Bacteroidia	Bacteroidales	Prolixibacteraceae	Tangfeifania	Al	-0.146591	0.263714	0.684627
Bacteria	Bacteroidota	Bacteroidia	Cytophagales	Spirosomaceae	Larkinella	Al	0.176661	0.176928	0.656884
Bacteria	Bacteroidota	Bacteroidia	Cytophagales			Al	0.0338288	0.797489	0.907548
Bacteria	Chlamydiota	Chlamydiia	Chlamydiales	Rhabdochlamydiaceae		Al	-0.161626	0.217297	0.667208
Bacteria	Chloroflexota	Dehalococcoidia	Tepidiformales	Tepidiformaceae	SLAK01	Al	0.154109	0.239735	0.676499
Bacteria	Chloroflexota	Ktedonobacteria	Ktedonobacterales	Ktedonobacteraceae	UBA11361	Al	0.109004	0.407075	0.747177
Bacteria	Cyanobacteria	Cyanobacteriia	Cyanobacteriales	Microcoleaceae	Microcoleus	Al	0.176661	0.176928	0.656884
Bacteria	Deinococcota	Deinococci	Deinococcales	Trueperaceae		Al	-0.169144	0.196373	0.659437
Bacteria	Dependentiae	Babeliae	Babeliales	Babeliaceae		Al	0.154109	0.239735	0.676499
Bacteria	Firmicutes	Bacilli	Bacillales	Anoxybacillaceae		Al	-0.199214	0.127014	0.61954
Bacteria	Firmicutes	Bacilli	Thermoactinomycetales			Al	0.0413463	0.753776	0.884482
Bacteria	Firmicutes	Clostridia	Clostridiales	Clostridiaceae	Clostridium	Al	0.176661	0.176928	0.656884
Bacteria	Firmicutes	Clostridia	Clostridiales	Oxobacteraceae	Oxobacter	Al	0.0864513	0.511314	0.815184
Bacteria	Firmicutes	Clostridia	Lachnospirales	Defluviitaleaceae	Defluviitalea	Al	0.206731	0.113007	0.604602
Bacteria	Firmicutes	Clostridia	Tissierellales	Sedimentibacteraceae	Sedimentibacter	Al	0.199214	0.127014	0.61954
Bacteria	Firmicutes	Negativicutes	Sporomusales			Al	0.0939688	0.475134	0.804553
Bacteria	Gemmatimonadota	Gemmatimonadetes	Longimicrobiales	RSA9	RSA9	Al	0.0750583	0.568695	0.830816
Bacteria	Methylomirabilota	Methylomirabilia	Rokubacteriales	CSP1-6	GWA2-73-35	Al	-0.161626	0.217297	0.667208
Bacteria	Methylomirabilota	Methylomirabilia	Rokubacteriales			Al	-0.0638988	0.627646	0.842909
Bacteria	Omnitrophota	Koll11	UBA10015	GCA-002753745	GCA-2753745	Al	-0.0589744	0.654446	0.852121
Bacteria	Patescibacteria	Gracilibacteria	UBA1369	UBA1369	UBA1369	Al	0.161626	0.217297	0.667208
Bacteria	Patescibacteria	Paceibacteria	UBA9983	UBA2103	C7867-001	Al	0.221766	0.0885801	0.604602
Bacteria	Patescibacteria	Paceibacteria	UBA9983			Al	0.107226	0.414813	0.749458
Bacteria	Patescibacteria	Saccharimonadia	Saccharimonadales	Saccharimonadaceae		Al	-0.161626	0.217297	0.667208
Bacteria	Planctomycetota	Phycisphaerae	Phycisphaerales	SM1A02		Al	-0.0864513	0.511314	0.815184
Bacteria	Planctomycetota	UBA1135	UBA1135	GCA-002686595	Pla163	Al	0.214249	0.100217	0.604602
Bacteria	Proteobacteria	Alphaproteobacteria	ATCC43930	Stellaceae	Stella	Al	0.0413463	0.753776	0.884482
Bacteria	Proteobacteria	Alphaproteobacteria	Caedimonadales			Al	-0.206731	0.113007	0.604602
Bacteria	Proteobacteria	Alphaproteobacteria	Dongiales	Dongiaceae	SYSU-D60009	Al	0.124039	0.345046	0.733222
Bacteria	Proteobacteria	Alphaproteobacteria	Micavibrionales	Micavibrionaceae	TMED27	Al	0.161626	0.217297	0.667208
Bacteria	Proteobacteria	Alphaproteobacteria	Rhizobiales	Rhodomicrobiaceae	Rhodomicrobium	Al	-0.221766	0.0885801	0.604602
Bacteria	Proteobacteria	Alphaproteobacteria	Rhodospirillales	Magnetospirillaceae	Telmatospirillum	Al	0.166201	0.204387	0.667067
Bacteria	Proteobacteria	Gammaproteobacteria	Diplorickettsiales	Diplorickettsiaceae		Al	-0.0939688	0.475134	0.804553
Bacteria	Proteobacteria	Gammaproteobacteria	Pseudomonadales	Pseudohongiellaceae	Pseudohongiella	Al	-0.0112763	0.931855	0.978167
Bacteria	Spirochaetota	Leptospirae	Leptospirales	Leptospiraceae	Leptospira	Al	-0.0563813	0.668738	0.852121
Bacteria	Spirochaetota	Leptospirae	Turneriellales	Turneriellaceae	Turneriella	Al	-0.0563813	0.668738	0.852121
Bacteria	Verrucomicrobiota	Verrucomicrobiae	Chthoniobacterales	UBA6821	UBA6821	Al	0.124039	0.345046	0.733222
Bacteria	Verrucomicrobiota	Verrucomicrobiae	Pedosphaerales	J093		Al	0.109004	0.407075	0.747177
Bacteria	Verrucomicrobiota	Verrucomicrobiae	Verrucomicrobiales	DEV007	Arctic95D-9	Al	0.109004	0.407075	0.747177
Bacteria	Verrucomicrobiota	Verrucomicrobiae	Verrucomicrobiales	Verrucomicrobiaceae	Verrucomicrobium	Al	0.191696	0.142299	0.627736
Bacteria	Actinobacteriota	Acidimicrobiia	Acidimicrobiales	Microtrichaceae	IMCC26207	Al	0.184179	0.158919	0.643619
Bacteria	Actinobacteriota	Acidimicrobiia				Al	0.139074	0.289254	0.700726
Bacteria	Actinobacteriota	Actinomycetia	Mycobacteriales	Mycobacteriaceae	Jongsikchunia	Al	0.0789338	0.548844	0.83013
Bacteria	Actinobacteriota	Actinomycetia	Sporichthyales	Sporichthyaceae	Longivirga	Al	-0.184179	0.158919	0.643619
Bacteria	Actinobacteriota	Actinomycetia	Streptosporangiales	Streptosporangiaceae		Al	0.191696	0.142299	0.627736
Bacteria	Actinobacteriota	Thermoleophilia	Miltoncostaeales	Miltoncostaeaceae		Al	-0.116521	0.375289	0.747177
Bacteria	Actinobacteriota	Thermoleophilia				Al	0.0338288	0.797489	0.907548
Bacteria	Armatimonadota	Chthonomonadetes				Al	0.184179	0.158919	0.643619
Bacteria	Bacteroidota	Bacteroidia	Bacteroidales			Al	-0.0263113	0.84183	0.940284
Bacteria	Bacteroidota	Bacteroidia	Cytophagales	172606-1	Rhodocytophaga	Al	-0.0563813	0.668738	0.852121
Bacteria	Bacteroidota	Bacteroidia	Cytophagales	Hymenobacteraceae	Pontibacter	Al	-0.101486	0.44037	0.770764
Bacteria	Bacteroidota	Bacteroidia	Cytophagales	Spirosomaceae	Runella	Al	0.0413463	0.753776	0.884482
Bacteria	Bacteroidota	Bacteroidia	Cytophagales	Spirosomaceae		Al	-0.0563813	0.668738	0.852121
Bacteria	Bacteroidota	Bacteroidia	Flavobacteriales	Flavobacteriaceae	Arenibacter	Al	-0.0112763	0.931855	0.978167
Bacteria	Bacteroidota	Ignavibacteria	Ignavibacteriales	Ignavibacteriaceae	IGN2	Al	0.206731	0.113007	0.604602
Bacteria	Bacteroidota	Ignavibacteria	Ignavibacteriales	Ignavibacteriaceae	UTCHB3	Al	0.0789338	0.548844	0.83013
Bacteria	Bacteroidota	Ignavibacteria	SJA-28	OLB5	OLB5	Al	0.206731	0.113007	0.604602
Bacteria	Bacteroidota	Kapabacteria	Kapabacteriales	UBA2268	PGYU01	Al	0.154109	0.239735	0.676499
Bacteria	Bdellovibrionota	Bacteriovoracia	Bacteriovoracales	Bacteriovoracaceae	Bacteriovorax	Al	0.191696	0.142299	0.627736
Bacteria	Bdellovibrionota	Bdellovibrionia	Bdellovibrionales	1-14-0-10-45-34	1-14-0-10-45-34	Al	0.206731	0.113007	0.604602
Bacteria	Bdellovibrionota	FAC87	UBA2466	UBA2466	RFNO01	Al	-0.0112763	0.931855	0.978167
Bacteria	Bdellovibrionota	UBA2361	SZUA-149	SZUA-149	SZUA-149	Al	-0.169144	0.196373	0.659437
Bacteria	Chlamydiota	Chlamydiia	Chlamydiales	Rhabdochlamydiaceae	Rhabdochlamydia	Al	0.124039	0.345046	0.733222
Bacteria	Chlamydiota	Chlamydiia				Al	-0.0112763	0.931855	0.978167
Bacteria	Chloroflexota	Anaerolineae	Anaerolineales	UBA4823	DSWF01	Al	0.0338288	0.797489	0.907548
Bacteria	Chloroflexota	Anaerolineae	Anaerolineales	UBA4823		Al	0.184179	0.158919	0.643619
Bacteria	Chloroflexota	Chloroflexia	Thermomicrobiales	Thermomicrobiaceae		Al	0.0563813	0.668738	0.852121
Bacteria	Chloroflexota	Dehalococcoidia	SM23-28-2	RBG-16-64-32	CF-163	Al	0.191696	0.142299	0.627736
Bacteria	Chloroflexota	Dehalococcoidia	UBA2963	UBA2963	Bin16	Al	0.154109	0.239735	0.676499
Bacteria	Chloroflexota	Dehalococcoidia	UBA2979	UBA2979		Al	-0.139074	0.289254	0.700726
Bacteria	Cyanobacteria	Vampirovibrionia	Obscuribacterales	Obscuribacteraceae	SBAT01	Al	0.139074	0.289254	0.700726
Bacteria	Dependentiae	Babeliae	Babeliales	UBA12411	UBA12411	Al	-0.00375875	0.977261	0.99198
Bacteria	Dependentiae	Babeliae	Babeliales	Vermiphilaceae	AWTP1-30	Al	0.206731	0.113007	0.604602
Bacteria	Desulfobacterota	Desulfobulbia	Desulfobulbales	Desulfobulbaceae		Al	0.109004	0.407075	0.747177
Bacteria	Eremiobacterota	Eremiobacteria	Baltobacterales	Baltobacteraceae	Tyrphobacter	Al	0.169144	0.196373	0.659437
Bacteria	FCPU426	Palsa-1180	Palsa-1180	Palsa-1180	Bog-1183	Al	0.206731	0.113007	0.604602
Bacteria	Firmicutes	Bacilli	Bacillales			Al	-0.221766	0.0885801	0.604602
Bacteria	Firmicutes	Clostridia	Caldicoprobacterales	Xylanivirgaceae	Xylanivirga	Al	0.191696	0.142299	0.627736
Bacteria	Fusobacteriota					Al	-0.199214	0.127014	0.61954
Bacteria	Gemmatimonadota	Gemmatimonadetes	Gemmatimonadales	Gemmatimonadaceae	JAABRT01	Al	0.139074	0.289254	0.700726
Bacteria	Myxococcota	Polyangia	Nannocystales	Nannocystaceae		Al	0.0488638	0.710819	0.873793
Bacteria	Myxococcota	UBA9160				Al	0.154109	0.239735	0.676499
Bacteria	Patescibacteria	Paceibacteria	UBA9983	Zambryskibacteraceae		Al	0.154109	0.239735	0.676499
Bacteria	Patescibacteria	Saccharimonadia	Saccharimonadales	UBA10212	21-14-0-10-47-8-A	Al	0.0789338	0.548844	0.83013
Bacteria	Patescibacteria	UBA1384	2-12-FULL-50-11	2-12-FULL-50-11	2-12-FULL-50-11	Al	-0.206731	0.113007	0.604602
Bacteria	Planctomycetota	Phycisphaerae	UBA1845	UBA1845	SBAX01	Al	0.184179	0.158919	0.643619
Bacteria	Planctomycetota	Planctomycetia	Pirellulales	Pirellulaceae	Mariniblastus	Al	0.0413463	0.753776	0.884482
Bacteria	Planctomycetota	Planctomycetia	Pirellulales	Thermoguttaceae	DSXL01	Al	0.214249	0.100217	0.604602
Bacteria	Planctomycetota	Planctomycetia	Pirellulales	UBA1268	F1-20-MAGs016	Al	-0.206731	0.113007	0.604602
Bacteria	Planctomycetota	Planctomycetia	Planctomycetales	Planctomycetaceae	DSVQ01	Al	0.0413463	0.753776	0.884482
Bacteria	Planctomycetota	UBA1135	UBA1135	GCA-002686595		Al	-0.0714163	0.58765	0.830816
Bacteria	Proteobacteria	Alphaproteobacteria	Geminicoccales	Geminicoccaceae	JAAAPF01	Al	0.0563813	0.668738	0.852121
Bacteria	Proteobacteria	Alphaproteobacteria	Micavibrionales	Micavibrionaceae	UBA1573	Al	-0.0187938	0.886665	0.962149
Bacteria	Proteobacteria	Alphaproteobacteria	Micavibrionales	Micavibrionaceae	UM-FILTER-47-13	Al	-0.0187938	0.886665	0.962149
Bacteria	Proteobacteria	Gammaproteobacteria	DSM-16500	DSM-16500	SCGC-AG-212-F23	Al	0.154109	0.239735	0.676499
Bacteria	Proteobacteria	Gammaproteobacteria	Enterobacterales	Enterobacteriaceae	Acerihabitans	Al	-0.0563813	0.668738	0.852121
Bacteria	Proteobacteria	Gammaproteobacteria	Legionellales	Legionellaceae	GCF-002776555	Al	0.0714163	0.58765	0.830816
Bacteria	Proteobacteria	Gammaproteobacteria	Pseudomonadales	Halieaceae	Halioglobus	Al	-0.0112763	0.931855	0.978167
Bacteria	Proteobacteria	Gammaproteobacteria	QQUJ01	QQUJ01	QQUJ01	Al	0.154109	0.239735	0.676499
Bacteria	Proteobacteria	Gammaproteobacteria	UBA1113	UBA1113	GCA-2707205	Al	-0.109004	0.407075	0.747177
Bacteria	UBA10199	UBA10199	UBA10199			Al	0.0939688	0.475134	0.804553
Bacteria	Verrucomicrobiota	Lentisphaeria				Al	0.154109	0.239735	0.676499
Bacteria	Verrucomicrobiota	Verrucomicrobiae	Pedosphaerales	J093	MWFF01	Al	0.154109	0.239735	0.676499
Bacteria	Actinobacteriota	Actinomycetia	Streptomycetales	Streptomycetaceae		Ca	0.0459572	0.726703	0.897618
Bacteria	Actinobacteriota	Actinomycetia	Streptomycetales	Streptomycetaceae	Streptomyces	Ca	-0.103282	0.432284	0.786774
Bacteria	Actinobacteriota	Actinomycetia	Propionibacteriales	Nocardioidaceae	Nocardioides	Ca	-0.0730799	0.578957	0.844211
Bacteria	Firmicutes	Bacilli	Bacillales	DSM-18226	Neobacillus	Ca	-0.31185	0.0152836	0.398042
Bacteria	Proteobacteria	Gammaproteobacteria	Xanthomonadales	Rhodanobacteraceae	Dyella	Ca	-0.153083	0.242916	0.694058
Bacteria	Proteobacteria	Gammaproteobacteria	Nevskiales	Nevskiaceae	Solimonas	Ca	0.0513519	0.696788	0.891895
Bacteria	Firmicutes	Bacilli	Bacillales	Sporolactobacillaceae	Pullulanibacillus	Ca	-0.285802	0.0268538	0.481035
Bacteria	Planctomycetota	Planctomycetia	Isosphaerales	Isosphaeraceae	Singulisphaera	Ca	0.102082	0.437676	0.786774
Bacteria	Proteobacteria	Gammaproteobacteria	Xanthomonadales	Rhodanobacteraceae		Ca	-0.0477143	0.717333	0.89446
Bacteria	Bacteroidota	Bacteroidia	Chitinophagales	Chitinophagaceae	Chitinophaga	Ca	0.25082	0.0532369	0.52268
Bacteria	Planctomycetota	Planctomycetia	Isosphaerales	Isosphaeraceae	Aquisphaera	Ca	0.180441	0.167696	0.633503
Bacteria	Proteobacteria	Alphaproteobacteria	Rhizobiales	Devosiaceae	Devosia	Ca	0.3705	0.00356844	0.308967
Bacteria	Proteobacteria	Gammaproteobacteria	Burkholderiales	Burkholderiaceae	Ramlibacter	Ca	-0.0203435	0.877388	0.962648
Bacteria	Proteobacteria	Gammaproteobacteria	Burkholderiales	Burkholderiaceae	Paraburkholderia	Ca	0.194943	0.135537	0.623788
Bacteria	Proteobacteria	Gammaproteobacteria	Xanthomonadales	Rhodanobacteraceae	Rhodanobacter	Ca	0.336534	0.00856078	0.397791
Bacteria	Proteobacteria	Alphaproteobacteria	Sphingomonadales	Sphingomonadaceae	Sphingomonas	Ca	0.0628613	0.633255	0.863255
Bacteria	Proteobacteria	Gammaproteobacteria	Xanthomonadales	Rhodanobacteraceae	Frateuria	Ca	0.105307	0.423261	0.786702
Bacteria	Proteobacteria	Gammaproteobacteria	Burkholderiales	Burkholderiaceae	Massilia	Ca	-0.425574	0.000699289	0.0974809
Bacteria	Proteobacteria	Alphaproteobacteria	Micropepsales	Micropepsaceae		Ca	0.340448	0.00777597	0.387132
Bacteria	Firmicutes	Bacilli	Bacillales	Bacillaceae	Bacillus	Ca	-0.141624	0.280413	0.713312
Bacteria	Proteobacteria	Gammaproteobacteria	Pseudomonadales	Moraxellaceae	Cavicella	Ca	0.115821	0.378185	0.744697
Bacteria	Proteobacteria	Alphaproteobacteria	Rhizobiales	Xanthobacteraceae		Ca	0.167146	0.201787	0.656869
Bacteria	Actinobacteriota	Actinomycetia	Actinomycetales	Dermatophilaceae		Ca	0.0808203	0.539303	0.817402
Bacteria	Bacteroidota	Bacteroidia	Sphingobacteriales	Sphingobacteriaceae	Mucilaginibacter	Ca	0.084071	0.523054	0.817402
Bacteria	Proteobacteria	Gammaproteobacteria	Pseudomonadales	Pseudomonadaceae	Pseudomonas	Ca	-0.0517011	0.694827	0.891895
Bacteria	Proteobacteria	Alphaproteobacteria	Rhizobiales	Rhizobiaceae	Rhizobium	Ca	0.3172	0.0135314	0.398042
Bacteria	Firmicutes	Bacilli				Ca	-0.216194	0.0970971	0.567895
Bacteria	Actinobacteriota	Actinomycetia	Streptosporangiales	Streptosporangiaceae	Spirillospora	Ca	0.235211	0.0704383	0.535932
Bacteria	Proteobacteria	Gammaproteobacteria	Burkholderiales	Burkholderiaceae		Ca	0.138375	0.291708	0.713923
Bacteria	Proteobacteria	Gammaproteobacteria	Pseudomonadales	Moraxellaceae		Ca	-0.0505287	0.701419	0.89446
Bacteria	Firmicutes	Bacilli	Alicyclobacillales	Alicyclobacillaceae	Alicyclobacillus	Ca	-0.308838	0.0163528	0.398042
Bacteria	Proteobacteria	Gammaproteobacteria	Nevskiales	Nevskiaceae	Stenotrophobium	Ca	0.00590111	0.964308	0.986704
Bacteria	Planctomycetota	Planctomycetia	Gemmatales	Gemmataceae	Gemmata	Ca	0.266509	0.039558	0.510591
Bacteria	Proteobacteria	Gammaproteobacteria	Xanthomonadales	Xanthomonadaceae		Ca	-0.328713	0.0103374	0.398042
Bacteria	Actinobacteriota	Actinomycetia	Mycobacteriales	Mycobacteriaceae	Mycobacterium	Ca	0.145823	0.266252	0.694058
Bacteria	Planctomycetota	Planctomycetia	Pirellulales	Pirellulaceae		Ca	0.21955	0.0918943	0.567895
Bacteria	Planctomycetota	Planctomycetia	Isosphaerales	Isosphaeraceae	Paludisphaera	Ca	-0.129416	0.324371	0.715765
Bacteria	Proteobacteria	Gammaproteobacteria	Burkholderiales	Methylophilaceae	Methylovorus	Ca	0.207262	0.112065	0.583132
Bacteria	Proteobacteria	Alphaproteobacteria	Rhizobiales	Rhizobiaceae	Mesorhizobium	Ca	0.206393	0.113611	0.583132
Bacteria	Proteobacteria	Gammaproteobacteria	Burkholderiales	Burkholderiaceae	Noviherbaspirillum	Ca	0.130606	0.319904	0.715765
Bacteria	Planctomycetota	Planctomycetia	Gemmatales	Gemmataceae	Urbifossiella	Ca	0.246466	0.0576491	0.52268
Bacteria						Ca	-0.0156771	0.905365	0.97083
Bacteria	Actinobacteriota	Actinomycetia				Ca	0.181886	0.164263	0.633503
Bacteria	Bacteroidota	Bacteroidia	Bacteroidales	Tenuifilaceae	SB25	Ca	0.234003	0.0719356	0.535932
Bacteria	Proteobacteria	Alphaproteobacteria	Rhizobiales	Xanthobacteraceae	Bradyrhizobium	Ca	0.193102	0.139342	0.623788
Bacteria	Proteobacteria	Alphaproteobacteria	Sphingomonadales	Sphingomonadaceae	Novosphingobium	Ca	-0.135347	0.302498	0.715765
Bacteria	Bacteroidota	Bacteroidia	Cytophagales	Cyclobacteriaceae	ELB16-189	Ca	0.320198	0.0126272	0.398042
Bacteria	Firmicutes	Bacilli	Paenibacillales	Paenibacillaceae	Paenibacillus	Ca	0.11404	0.385611	0.752859
Bacteria	Bacteroidota	Bacteroidia	Chitinophagales	Chitinophagaceae	Niastella	Ca	0.320944	0.0124104	0.398042
Bacteria	Proteobacteria	Alphaproteobacteria	Rhizobiales	Xanthobacteraceae	Pseudolabrys	Ca	0.111091	0.398095	0.760756
Bacteria	Proteobacteria	Alphaproteobacteria	Caulobacterales	Caulobacteraceae	Phenylobacterium	Ca	0.0953868	0.468467	0.809703
Bacteria	Bacteroidota	Bacteroidia	Chitinophagales	Chitinophagaceae	Arachidicoccus	Ca	-0.440128	0.000433256	0.0793674
Bacteria	Bdellovibrionota	Bacteriovoracia	Bacteriovoracales	Peredibacteraceae	Peredibacter	Ca	0.438637	0.00045548	0.0793674
Bacteria	Proteobacteria	Gammaproteobacteria	Burkholderiales	Burkholderiaceae	Bordetella	Ca	-0.133742	0.308321	0.715765
Bacteria	Myxococcota	Polyangia	Polyangiales	Polyangiaceae		Ca	0.136402	0.298708	0.715765
Bacteria	Planctomycetota	Planctomycetia	Pirellulales	Pirellulaceae	Pirellula	Ca	0.28453	0.0275694	0.481035
Bacteria	Proteobacteria	Gammaproteobacteria	Burkholderiales	Burkholderiaceae	Pandoraea	Ca	-0.0360716	0.784376	0.926417
Bacteria	Proteobacteria	Alphaproteobacteria	Caulobacterales	Caulobacteraceae	Asticcacaulis	Ca	-0.0188771	0.886165	0.962648
Bacteria	Planctomycetota	Planctomycetia	Isosphaerales	Isosphaeraceae		Ca	-0.0366194	0.781182	0.926417
Bacteria	Acidobacteriota	Vicinamibacteria	Vicinamibacterales	SCN-69-37	SCN-69-37	Ca	0.206297	0.113782	0.583132
Bacteria	Proteobacteria	Alphaproteobacteria	Reyranellales	Reyranellaceae	Reyranella	Ca	0.111073	0.398175	0.760756
Bacteria	Proteobacteria	Gammaproteobacteria	Burkholderiales	Rhodocyclaceae	Aromatoleum	Ca	0.101629	0.439723	0.786774
Bacteria	Proteobacteria	Gammaproteobacteria	Xanthomonadales	Rhodanobacteraceae	Dokdonella	Ca	0.276723	0.0323235	0.484637
Bacteria	Proteobacteria	Alphaproteobacteria	Rhizobiales	Labraceae		Ca	0.109123	0.406557	0.764773
Bacteria	Acidobacteriota	Vicinamibacteria	Vicinamibacterales	UBA2999	WHSN01	Ca	0.17706	0.175937	0.633503
Bacteria	Proteobacteria	Gammaproteobacteria	Enterobacterales	Enterobacteriaceae		Ca	-0.0659033	0.616871	0.859469
Bacteria	Planctomycetota	Planctomycetia	Planctomycetales	Planctomycetaceae	Caulifigura	Ca	0.0862584	0.51226	0.817402
Bacteria	Actinobacteriota	Actinomycetia	Propionibacteriales	Nocardioidaceae	Aeromicrobium	Ca	0.116654	0.374742	0.744697
Bacteria	Proteobacteria	Alphaproteobacteria	Rhizobiales	Devosiaceae		Ca	0.132364	0.313375	0.715765
Bacteria	Cyanobacteria	Sericytochromatia	UBA7694	UBA7694	GCA-2770975	Ca	0.0512443	0.697393	0.891895
Bacteria	Proteobacteria	Gammaproteobacteria	Burkholderiales	Usitatibacteraceae		Ca	0.161567	0.217467	0.676672
Bacteria	Proteobacteria	Alphaproteobacteria	Micropepsales	Micropepsaceae	Rhizomicrobium	Ca	0.322452	0.0119821	0.398042
Bacteria	Bacteroidota	Bacteroidia	Cytophagales	Cyclobacteriaceae	Chryseolinea	Ca	0.118521	0.367092	0.744193
Bacteria	Planctomycetota	Planctomycetia	Planctomycetales	Planctomycetaceae	Planctopirus	Ca	0.250918	0.0531403	0.52268
Bacteria	Proteobacteria	Gammaproteobacteria	Burkholderiales	Methylophilaceae		Ca	0.250065	0.0539815	0.52268
Bacteria	Myxococcota	Myxococcia	Myxococcales	Myxococcaceae		Ca	0.0521384	0.692374	0.891895
Bacteria	Actinobacteriota	Actinomycetia	Streptomycetales	Catenulisporaceae	Actinospica	Ca	0.1823	0.163289	0.633503
Bacteria	Planctomycetota	Phycisphaerae	Tepidisphaerales	Tepidisphaeraceae	UBA2421	Ca	0.202358	0.121003	0.606361
Bacteria	Firmicutes	Bacilli	Paenibacillales	Paenibacillaceae	Cohnella	Ca	-0.115013	0.381545	0.747013
Bacteria	Proteobacteria	Gammaproteobacteria	Xanthomonadales	Rhodanobacteraceae	Luteibacter	Ca	-0.0321256	0.807485	0.930276
Bacteria	Planctomycetota	Planctomycetia	Planctomycetales	Planctomycetaceae	Planctomyces	Ca	-0.134975	0.30384	0.715765
Bacteria	Verrucomicrobiota	Verrucomicrobiae	Verrucomicrobiales	Verrucomicrobiaceae	Prosthecobacter	Ca	0.0229418	0.861872	0.954208
Bacteria	Verrucomicrobiota	Verrucomicrobiae	Pedosphaerales	Pedosphaeraceae	Pedosphaera	Ca	0.288465	0.0254053	0.481035
Bacteria	Proteobacteria	Alphaproteobacteria	Dongiales	Dongiaceae	Dongia	Ca	0.312471	0.0150705	0.398042
Bacteria	Chloroflexota	Chloroflexia	Thermomicrobiales			Ca	0.149626	0.253848	0.694058
Bacteria	Proteobacteria	Gammaproteobacteria	Burkholderiales	Nitrosomonadaceae	Nitrosomonas	Ca	0.166499	0.203564	0.656869
Bacteria	Proteobacteria	Gammaproteobacteria	Burkholderiales	Burkholderiaceae	Castellaniella	Ca	0.305248	0.0177109	0.398042
Bacteria	Proteobacteria	Alphaproteobacteria	Sphingomonadales	Sphingomonadaceae		Ca	-0.0552901	0.674787	0.877475
Bacteria	Proteobacteria	Alphaproteobacteria				Ca	0.187018	0.152483	0.627752
Bacteria	Actinobacteriota	Actinomycetia	Actinomycetales	Microbacteriaceae		Ca	0.0382001	0.771986	0.926118
Bacteria	Planctomycetota	Planctomycetia	Planctomycetales	UBA10511	UBA10511	Ca	-0.0980615	0.456029	0.804689
Bacteria	Proteobacteria	Alphaproteobacteria	Rhodobacterales	Rhodobacteraceae	Paracoccus	Ca	0.0341763	0.795453	0.926417
Bacteria	Firmicutes	Bacilli	Bacillales	Bacillaceae	Priestia	Ca	-0.0182027	0.890206	0.962648
Bacteria	Gemmatimonadota	Gemmatimonadetes	Gemmatimonadales	Gemmatimonadaceae	Gemmatimonas	Ca	0.0881935	0.502806	0.817402
Bacteria	Gemmatimonadota	Gemmatimonadetes	Gemmatimonadales	Gemmatimonadaceae	Roseisolibacter	Ca	0.254136	0.0500639	0.52268
Bacteria	Proteobacteria	Gammaproteobacteria	Burkholderiales	Burkholderiaceae	Caballeronia	Ca	0.0960208	0.465502	0.809703
Bacteria	Myxococcota	Polyangia	Polyangiales			Ca	0.306789	0.0171167	0.398042
Bacteria	Proteobacteria	Gammaproteobacteria	Nevskiales	Nevskiaceae	Nevskia	Ca	-0.16682	0.202682	0.656869
Bacteria	Proteobacteria	Gammaproteobacteria	Pseudomonadales	Moraxellaceae	Acinetobacter	Ca	-0.132644	0.312344	0.715765
Bacteria	Verrucomicrobiota	Verrucomicrobiae	Opitutales	Opitutaceae	ER46	Ca	0.507041	3.56068e-05	0.024818
Bacteria	Bacteroidota	Bacteroidia	Bacteroidales	Marinilabiliaceae	JC017	Ca	-0.267081	0.0391204	0.510591
Bacteria	Bacteroidota	Bacteroidia	Chitinophagales	Chitinophagaceae	Ginsengibacter	Ca	0.206683	0.113092	0.583132
Bacteria	Proteobacteria	Gammaproteobacteria	Burkholderiales	Burkholderiaceae	Pusillimonas	Ca	-0.0916184	0.486297	0.812066
Bacteria	Bacteroidota	Bacteroidia	Chitinophagales	Chitinophagaceae		Ca	0.295265	0.0220023	0.447384
Bacteria	Proteobacteria	Gammaproteobacteria	Xanthomonadales	Xanthomonadaceae	Luteimonas	Ca	0.0706279	0.591791	0.84872
Bacteria	Acidobacteriota	Acidobacteriae	Acidobacteriales	Acidobacteriaceae	Edaphobacter	Ca	0.000521973	0.996842	0.996842
Bacteria	Bacteroidota	Bacteroidia	Chitinophagales	Chitinophagaceae	Haoranjiania	Ca	0.0135267	0.918298	0.977993
Bacteria	Proteobacteria	Gammaproteobacteria	Nevskiales	Nevskiaceae		Ca	0.176235	0.177991	0.633503
Bacteria	Proteobacteria	Gammaproteobacteria	Pseudomonadales	Pseudomonadaceae		Ca	0.118634	0.366634	0.744193
Bacteria	Bacteroidota	Bacteroidia	Cytophagales	Spirosomaceae	Dyadobacter	Ca	0.0127246	0.923128	0.979003
Bacteria	Proteobacteria	Gammaproteobacteria	Burkholderiales	Rhodocyclaceae	Thauera	Ca	0.0480343	0.715518	0.89446
Bacteria	Proteobacteria	Alphaproteobacteria	Rhizobiales	Xanthobacteraceae	Afipia	Ca	-0.0973885	0.459142	0.807707
Bacteria	Proteobacteria	Alphaproteobacteria	Parvibaculales	Parvibaculaceae	Parvibaculum	Ca	-0.0272717	0.836135	0.941057
Bacteria	Proteobacteria	Alphaproteobacteria	Rhizobiales	Stappiaceae		Ca	0.0495272	0.707068	0.89446
Bacteria	Firmicutes	Bacilli	Paenibacillales	NBRC-103111	VKM-B-2647	Ca	0.120913	0.357434	0.7349
Bacteria	Acidobacteriota	Vicinamibacteria	Vicinamibacterales	UBA2999		Ca	0.270204	0.0367999	0.500708
Bacteria	Actinobacteriota	Actinomycetia	Mycobacteriales	Micromonosporaceae	Actinocatenispora	Ca	0.0656646	0.618149	0.859469
Bacteria	Bacteroidota	Bacteroidia	Cytophagales	Cyclobacteriaceae	Ohtaekwangia	Ca	0.157441	0.229601	0.694058
Bacteria	Bacteroidota	Bacteroidia	Chitinophagales	Chitinophagaceae	Edaphocola	Ca	-0.158259	0.227157	0.694058
Bacteria	Gemmatimonadota	Gemmatimonadetes	Gemmatimonadales	Gemmatimonadaceae		Ca	0.192707	0.140168	0.623788
Bacteria	Proteobacteria	Alphaproteobacteria	Rhizobiales	Rhizobiaceae	Shinella	Ca	-0.206978	0.112569	0.583132
Bacteria	Verrucomicrobiota	Verrucomicrobiae	Opitutales	Opitutaceae	Lacunisphaera	Ca	0.10315	0.432872	0.786774
Bacteria	Chloroflexota	Limnocylindria	Limnocylindrales	CSP1-4	GWC2-73-18	Ca	-0.0625868	0.634742	0.863255
Bacteria	Proteobacteria	Gammaproteobacteria	Berkiellales	Berkiellaceae	Berkiella	Ca	0.252376	0.0517277	0.52268
Bacteria	Actinobacteriota	Thermoleophilia	Solirubrobacterales	Solirubrobacteraceae	Baekduia	Ca	0.0352583	0.789124	0.926417
Bacteria	Myxococcota	Polyangia	Polyangiales	SLQV01	SLQV01	Ca	0.300206	0.0197795	0.417767
Bacteria	Proteobacteria	Gammaproteobacteria	Burkholderiales	SG8-41	UBA5216	Ca	0.161688	0.217119	0.676672
Bacteria	Dependentiae	Babeliae	Babeliales	Vermiphilaceae	Vermiphilus	Ca	0.25663	0.0477808	0.52268
Bacteria	Proteobacteria	Alphaproteobacteria	Sphingomonadales	Sphingomonadaceae	Sphingopyxis	Ca	-0.056267	0.66937	0.87533
Bacteria	Bacteroidota	Bacteroidia	Chitinophagales	Chitinophagaceae	Flavipsychrobacter	Ca	-0.00520164	0.968536	0.986704
Bacteria	Actinobacteriota	Thermoleophilia	Solirubrobacterales	70-9	VAYN01	Ca	0.0926322	0.481465	0.812066
Bacteria	Bdellovibrionota	Bdellovibrionia	UBA1018	UBA1018	GWA1-52-35	Ca	0.249863	0.0541822	0.52268
Bacteria	Myxococcota	Myxococcia	Myxococcales	Myxococcaceae	WRKR01	Ca	0.361319	0.00456259	0.308967
Bacteria	Proteobacteria	Gammaproteobacteria	Legionellales	Legionellaceae	Legionella	Ca	0.0226098	0.863853	0.954208
Bacteria	Actinobacteriota					Ca	-0.0408951	0.75638	0.91053
Bacteria	Actinobacteriota	Actinomycetia	Actinomycetales	Microbacteriaceae	Leifsonia	Ca	0.0153228	0.907494	0.971141
Bacteria	Bacteroidota	Bacteroidia	Chitinophagales	Chitinophagaceae	Sediminibacterium	Ca	0.345359	0.00688066	0.368909
Bacteria	Myxococcota	UBA796	UBA796	GCA-2862545	REDI01	Ca	0.228659	0.0788681	0.536264
Bacteria	Verrucomicrobiota	Verrucomicrobiae	Pedosphaerales	CAIYYI01	DSWX01	Ca	0.154719	0.237858	0.694058
Bacteria	Proteobacteria	Gammaproteobacteria	Burkholderiales	Burkholderiaceae	Trinickia	Ca	0.103883	0.429592	0.786774
Bacteria	Firmicutes	Bacilli	Bacillales	DSM-1321	Peribacillus	Ca	0.0072784	0.955985	0.986704
Bacteria	Proteobacteria	Gammaproteobacteria	Burkholderiales	Burkholderiaceae	Candidimonas	Ca	-0.112091	0.393836	0.758297
Bacteria	Proteobacteria	Alphaproteobacteria	Acetobacterales	Acetobacteraceae	Rhodopila	Ca	-0.0761098	0.563276	0.828278
Bacteria	Bacteroidota	Bacteroidia	Sphingobacteriales	Sphingobacteriaceae	Pararcticibacter	Ca	-0.00260725	0.984226	0.98978
Bacteria	Proteobacteria	Gammaproteobacteria	Burkholderiales	Burkholderiaceae	Burkholderia	Ca	-0.214536	0.0997514	0.567895
Bacteria	Actinobacteriota	Actinomycetia	Actinomycetales	Micrococcaceae		Ca	0.0432344	0.742911	0.909257
Bacteria	Bacteroidota	Bacteroidia	Chitinophagales	Chitinophagaceae	Agriterribacter	Ca	0.281544	0.0293134	0.484637
Bacteria	Proteobacteria	Alphaproteobacteria	Caulobacterales	Hyphomonadaceae	Asprobacter	Ca	0.0918113	0.485376	0.812066
Bacteria	Bacteroidota	Bacteroidia	AKYH767-A	OLB10	OLB10	Ca	0.147588	0.260445	0.694058
Bacteria	Chloroflexota	Anaerolineae	Caldilineales	Caldilineaceae		Ca	0.175239	0.180496	0.638608
Bacteria	Acidobacteriota	Acidobacteriae	Bryobacterales	Bryobacteraceae	KBS-96	Ca	0.177386	0.175131	0.633503
Bacteria	Verrucomicrobiota	Verrucomicrobiae	Chthoniobacterales	Terrimicrobiaceae	Terrimicrobium	Ca	-0.0754659	0.566592	0.83084
Bacteria	Bacteroidota	Bacteroidia	AKYH767	B-17BO	UBA4416	Ca	0.242793	0.0615976	0.529154
Bacteria	Myxococcota	Polyangia	Haliangiales	Haliangiaceae	Haliangium	Ca	0.151915	0.246573	0.694058
Bacteria	Firmicutes	Bacilli	Paenibacillales	NBRC-103111	Paenibacillus	Ca	0.134414	0.305872	0.715765
Bacteria	Bacteroidota	Bacteroidia	Chitinophagales	Chitinophagaceae	Parafilimonas	Ca	0.230729	0.0761223	0.535932
Bacteria	Proteobacteria	Alphaproteobacteria	Sphingomonadales	Sphingomonadaceae	Allosphingosinicella	Ca	0.145179	0.268394	0.694058
Bacteria	Bacteroidota	Bacteroidia	Sphingobacteriales	Sphingobacteriaceae	Pedobacter	Ca	0.179627	0.169655	0.633503
Bacteria	Planctomycetota	Planctomycetia	Pirellulales	Pirellulaceae	Anammoximicrobium	Ca	0.254488	0.049736	0.52268
Bacteria	Omnitrophota	Omnitrophia	Omnitrophales	UBA2337		Ca	0.274091	0.034073	0.484637
Bacteria	Bacteroidota	Bacteroidia	Sphingobacteriales	Sphingobacteriaceae		Ca	0.210497	0.106453	0.583132
Bacteria	Cyanobacteria	Vampirovibrionia				Ca	0.303826	0.0182745	0.398042
Bacteria	Proteobacteria	Alphaproteobacteria	Rhizobiales	Rhizobiaceae		Ca	-0.031132	0.81333	0.933923
Bacteria	Gemmatimonadota	Gemmatimonadetes	Longimicrobiales	Longimicrobiaceae	Longimicrobium	Ca	-0.0736981	0.575741	0.841282
Bacteria	Proteobacteria	Alphaproteobacteria	Rhizobiales	Kaistiaceae	Bauldia	Ca	0.211182	0.105292	0.583132
Bacteria	Verrucomicrobiota	Verrucomicrobiae	Pedosphaerales	UBA11358	UBA11358	Ca	0.021967	0.867688	0.956928
Bacteria	Proteobacteria	Alphaproteobacteria	Caulobacterales	Caulobacteraceae	PMMR1	Ca	0.269442	0.0373556	0.500708
Bacteria	Planctomycetota	Planctomycetia	Isosphaerales	Isosphaeraceae	Tundrisphaera	Ca	-0.0679636	0.605877	0.859469
Bacteria	Proteobacteria	Alphaproteobacteria	Rhizobiales	Xanthobacteraceae	Rhodopseudomonas	Ca	0.00831692	0.949712	0.985363
Bacteria	Bacteroidota	Bacteroidia	Chitinophagales	Saprospiraceae	OLB8	Ca	0.00326031	0.980276	0.987359
Bacteria	Proteobacteria	Alphaproteobacteria	Rhizobiales	Rhizobiaceae	Sinorhizobium	Ca	-0.190225	0.145444	0.627752
Bacteria	Myxococcota	Polyangia	Polyangiales	Polyangiaceae	Aetherobacter	Ca	0.281388	0.029407	0.484637
Bacteria	Acidobacteriota	Blastocatellia	Pyrinomonadales	Pyrinomonadaceae	OLB17	Ca	-0.0836967	0.524913	0.817402
Bacteria	Myxococcota	Polyangia	Haliangiales	Haliangiaceae		Ca	0.331293	0.00971906	0.398042
Bacteria	Actinobacteriota	Thermoleophilia	Solirubrobacterales			Ca	0.0209344	0.873856	0.962207
Bacteria	Proteobacteria	Gammaproteobacteria				Ca	0.184817	0.157454	0.627752
Bacteria	Proteobacteria	Alphaproteobacteria	Rhizobiales	Hyphomicrobiaceae	Hyphomicrobium	Ca	-0.10409	0.428671	0.786774
Bacteria	Armatimonadota	Fimbriimonadia	Fimbriimonadales	Fimbriimonadaceae	Fimbriimonas	Ca	0.0830531	0.528116	0.817402
Bacteria	Firmicutes	Bacilli	Bacillales	Bacillaceae		Ca	-0.29429	0.0224655	0.447384
Bacteria	Proteobacteria	Gammaproteobacteria	Steroidobacterales	Steroidobacteraceae		Ca	-0.0311829	0.81303	0.933923
Bacteria	Proteobacteria	Gammaproteobacteria	Burkholderiales	Burkholderiaceae	Ralstonia	Ca	-0.274389	0.0338711	0.484637
Bacteria	Chloroflexota	Limnocylindria				Ca	0.0626528	0.634384	0.863255
Bacteria	Proteobacteria	Alphaproteobacteria	Micavibrionales	Micavibrionaceae	UBA6145	Ca	0.36854	0.00376284	0.308967
Bacteria	Proteobacteria	Alphaproteobacteria	Rhizobiales	Rhizobiaceae	Ensifer	Ca	-0.139455	0.28792	0.713923
Bacteria	Acidobacteriota	Thermoanaerobaculia	UBA5704	UBA5704		Ca	-0.0817685	0.534538	0.817402
Bacteria	Proteobacteria	Alphaproteobacteria	Rhizobiales	Beijerinckiaceae		Ca	-0.194003	0.13747	0.623788
Bacteria	Gemmatimonadota	Gemmatimonadetes	Gemmatimonadales	GWC2-71-9	Palsa-1233	Ca	0.247851	0.0562148	0.52268
Bacteria	Myxococcota	Myxococcia	Myxococcales	Vulgatibacteraceae	Vulgatibacter	Ca	0.101268	0.441361	0.786774
Bacteria	Proteobacteria	Gammaproteobacteria	DSM-16500	DSM-16500	Aquicella	Ca	0.276553	0.032434	0.484637
Bacteria	Actinobacteriota	Acidimicrobiia	Acidimicrobiales	JACDCH01	VFJN01	Ca	0.0928523	0.48042	0.812066
Bacteria	Planctomycetota	Planctomycetia	Gemmatales	Gemmataceae		Ca	-0.0296323	0.822172	0.935838
Bacteria	Actinobacteriota	Actinomycetia	Mycobacteriales	Geodermatophilaceae	Geodermatophilus	Ca	-0.00487322	0.970522	0.986704
Bacteria	Proteobacteria	Gammaproteobacteria	Legionellales	Legionellaceae		Ca	-0.0303461	0.817961	0.934621
Bacteria	Proteobacteria	Gammaproteobacteria	Steroidobacterales	Steroidobacteraceae	SCUD01	Ca	0.0478446	0.716594	0.89446
Bacteria	Planctomycetota	Planctomycetia	Pirellulales			Ca	0.236374	0.0690197	0.535932
Bacteria	Proteobacteria	Alphaproteobacteria	Rhodobacterales	Rhodobacteraceae		Ca	-0.286916	0.0262395	0.481035
Bacteria	Bacteroidota	Bacteroidia	Flavobacteriales	Crocinitomicaceae	Fluviicola	Ca	0.218313	0.0937864	0.567895
Bacteria	Proteobacteria	Alphaproteobacteria	Rhizobiales	Beijerinckiaceae	Microvirga	Ca	-0.0331968	0.801194	0.929172
Bacteria	Planctomycetota	Planctomycetia	Planctomycetales	Planctomycetaceae	Schlesneria	Ca	0.138315	0.29192	0.713923
Bacteria	Chlamydiota	Chlamydiia	Chlamydiales	Parachlamydiaceae	HS-T3	Ca	0.209011	0.109003	0.583132
Bacteria	Proteobacteria	Alphaproteobacteria	Rhodospirillales			Ca	0.155502	0.235462	0.694058
Bacteria	Proteobacteria	Gammaproteobacteria	Pseudomonadales			Ca	0.0605298	0.645932	0.869141
Bacteria	Chloroflexota	Chloroflexia	Chloroflexales	Roseiflexaceae	Kouleothrix	Ca	-0.0665275	0.613531	0.859469
Bacteria	Sumerlaeota	Sumerlaeia	Sumerlaeales	Sumerlaeaceae	HGW-BRC1-1	Ca	0.248698	0.0553515	0.52268
Bacteria	Proteobacteria	Gammaproteobacteria	Pseudomonadales	Alcanivoracaceae	Alcanivorax	Ca	-0.183964	0.159415	0.627752
Bacteria	Proteobacteria	Alphaproteobacteria	Micavibrionales	UBA2020	UBA2020	Ca	0.349011	0.00627459	0.364449
Bacteria	Verrucomicrobiota	Verrucomicrobiae	Verrucomicrobiales	Verrucomicrobiaceae	VFKE01	Ca	0.0816417	0.535174	0.817402
Bacteria	Bdellovibrionota	Bdellovibrionia	Bdellovibrionales	Bdellovibrionaceae	Bdellovibrio	Ca	-0.110156	0.402104	0.764773
Bacteria	Bacteroidota	Bacteroidia	Sphingobacteriales	Sphingobacteriaceae	Pelobium	Ca	-0.258525	0.0461029	0.52268
Bacteria	Myxococcota	Polyangia	Polyangiales	Polyangiaceae	Palsa-1150	Ca	0.12152	0.355004	0.732065
Bacteria	Actinobacteriota	Actinomycetia	Propionibacteriales	Nocardioidaceae	Marmoricola	Ca	-0.192637	0.140314	0.623788
Bacteria	Planctomycetota	Planctomycetia	Gemmatales	Gemmataceae	Zavarzinella	Ca	0.306121	0.0173722	0.398042
Bacteria	Acidobacteriota	Vicinamibacteria	Vicinamibacterales			Ca	-0.0523086	0.691419	0.891895
Bacteria	Actinobacteriota	Actinomycetia	Mycobacteriales	Jatrophihabitantaceae	Jatrophihabitans	Ca	-0.187902	0.150516	0.627752
Bacteria	Proteobacteria	Alphaproteobacteria	Sphingomonadales	Sphingomonadaceae	Sphingomicrobium	Ca	-0.0272076	0.836514	0.941057
Bacteria	Chloroflexota	Dehalococcoidia	DSTF01	WHTK01	WHTK01	Ca	-0.0159677	0.903619	0.970451
Bacteria	Acidobacteriota	Acidobacteriae	Bryobacterales	Bryobacteraceae		Ca	0.16841	0.198351	0.654082
Bacteria	Bacteroidota	SZUA-365	SZUA-365	SZUA-365	BM516	Ca	0.264327	0.0412659	0.513613
Bacteria	Proteobacteria	Alphaproteobacteria	Rhizobiales	Beijerinckiaceae	Bosea	Ca	-0.23169	0.074874	0.535932
Bacteria	Proteobacteria	Gammaproteobacteria	DSM-16500	DSM-16500	UBA4722	Ca	-0.118286	0.368052	0.744193
Bacteria	Proteobacteria	Gammaproteobacteria	Burkholderiales	SG8-39	SCGC-AG-212-J23	Ca	0.0994345	0.449715	0.795562
Bacteria	Bacteroidota	Bacteroidia	Chitinophagales	Chitinophagaceae	Edaphobaculum	Ca	-0.048963	0.710258	0.89446
Bacteria	Chloroflexota	Anaerolineae				Ca	-0.119965	0.361241	0.740544
Bacteria	Planctomycetota	Phycisphaerae	WQYP01	WQYP01	WQYP01	Ca	0.0420374	0.749793	0.91053
Bacteria	Actinobacteriota	Acidimicrobiia	Acidimicrobiales	RAAP-2	Bog-756	Ca	-0.0397679	0.762896	0.916791
Bacteria	Bacteroidota	Bacteroidia	Cytophagales	Cyclobacteriaceae	Chryseotalea	Ca	0.0713543	0.587975	0.846683
Bacteria	Planctomycetota	Planctomycetia	Pirellulales	UBA7805	MB-PLM-2	Ca	0.201371	0.122866	0.606361
Bacteria	Proteobacteria	Alphaproteobacteria	Sphingomonadales	Sphingomonadaceae	Sphingobium	Ca	-0.231043	0.0757136	0.535932
Bacteria	Proteobacteria	Alphaproteobacteria	Rhizobiales	UBA4765	UBA4765	Ca	-0.00149524	0.990953	0.992377
Bacteria	Proteobacteria	Alphaproteobacteria	Acetobacterales	Acetobacteraceae		Ca	-0.119264	0.364077	0.74417
Bacteria	Proteobacteria	Alphaproteobacteria	Rhizobiales	Rhizobiaceae	Allorhizobium	Ca	0.195454	0.134496	0.623788
Bacteria	Proteobacteria	Alphaproteobacteria	Rhodospirillales	GLO-3	GLO-3	Ca	0.0814286	0.536244	0.817402
Bacteria	Proteobacteria	Gammaproteobacteria	Xanthomonadales	Xanthomonadaceae	Pseudoxanthomonas	Ca	0.0253418	0.847587	0.943719
Bacteria	Bacteroidota	Bacteroidia	Chitinophagales	Chitinophagaceae	Niabella	Ca	-0.216264	0.0969872	0.567895
Bacteria	Proteobacteria	Alphaproteobacteria	Rhizobiales	Xanthobacteraceae	Aquabacter	Ca	-0.0853427	0.516765	0.817402
Bacteria	Verrucomicrobiota	Verrucomicrobiae	Pedosphaerales	UBA11358	WYBW01	Ca	-0.00395025	0.976103	0.986704
Bacteria	Planctomycetota	Planctomycetia	Planctomycetales	Planctomycetaceae	Planctomicrobium	Ca	0.130401	0.320669	0.715765
Bacteria	Proteobacteria	Alphaproteobacteria	Caulobacterales	Caulobacteraceae		Ca	-0.228947	0.0784823	0.536264
Bacteria	Actinobacteriota	Actinomycetia	Actinomycetales	Micrococcaceae	Paenarthrobacter	Ca	-0.0350101	0.790575	0.926417
Bacteria	Firmicutes	Bacilli	Paenibacillales	NBRC-103111		Ca	-0.0185763	0.887967	0.962648
Bacteria	Actinobacteriota	Actinomycetia	Actinomycetales	Cellulomonadaceae	Cellulomonas	Ca	-0.0430041	0.744234	0.909257
Bacteria	Proteobacteria	Alphaproteobacteria	Sphingomonadales	Sphingomonadaceae	Rhizorhabdus	Ca	-0.228378	0.0792471	0.536264
Bacteria	Planctomycetota	UBA1135	UBA2386	UBA2386	UBA2386	Ca	-0.142314	0.278052	0.712167
Bacteria	Myxococcota	Polyangia	Polyangiales	Polyangiaceae	Chondromyces	Ca	0.100324	0.445653	0.792398
Bacteria	Proteobacteria	Alphaproteobacteria	Rhizobiales	Kaistiaceae	Kaistia	Ca	-0.128417	0.32815	0.715765
Bacteria	Fibrobacterota	Fibrobacteria	Fibrobacterales	Fibrobacteraceae		Ca	0.241523	0.0630126	0.529154
Bacteria	Bacteroidota	Bacteroidia	AKYH767	B-17BO	UBA2475	Ca	-0.0142719	0.913813	0.975387
Bacteria	Actinobacteriota	Actinomycetia	Actinomycetales	Microbacteriaceae	Gryllotalpicola	Ca	0.0102052	0.938315	0.981694
Bacteria	Bacteroidota	Bacteroidia	AKYH767	2-12-FULL-35-15	2-12-FULL-35-15	Ca	0.358791	0.0048761	0.308967
Bacteria	Proteobacteria	Alphaproteobacteria	Azospirillales	Azospirillaceae	Azospirillum	Ca	-0.260239	0.0446279	0.52268
Bacteria	Planctomycetota	Planctomycetia	Pirellulales	Lacipirellulaceae		Ca	-0.0953008	0.46887	0.809703
Bacteria	Bacteroidota	Bacteroidia	Cytophagales	Cytophagaceae	Cytophaga	Ca	0.127251	0.332599	0.715765
Bacteria	Chloroflexota	Anaerolineae	Aggregatilineales	A4b		Ca	0.0023934	0.98552	0.98978
Bacteria	Planctomycetota	Planctomycetia	Planctomycetales	Planctomycetaceae	Alienimonas	Ca	0.150204	0.251996	0.694058
Bacteria	Bacteroidota	Bacteroidia	Cytophagales	Cyclobacteriaceae		Ca	-0.0464941	0.724271	0.897618
Bacteria	Bacteroidota	Bacteroidia	Cytophagales	Cytophagaceae	Sporocytophaga	Ca	0.36125	0.00457093	0.308967
Bacteria	Proteobacteria	Alphaproteobacteria	Caedimonadales	Nucleicultricaceae	Nucleicultrix	Ca	0.138759	0.290356	0.713923
Bacteria	Patescibacteria	Saccharimonadia	UBA4664	UBA4664	UBA4664	Ca	0.197702	0.129983	0.616314
Bacteria	Proteobacteria	Gammaproteobacteria	Pseudomonadales	Pseudohongiellaceae		Ca	0.24231	0.0621326	0.529154
Bacteria	Actinobacteriota	Actinomycetia	Mycobacteriales	Mycobacteriaceae	Nocardia	Ca	0.203382	0.119094	0.601512
Bacteria	Planctomycetota	Planctomycetia	Planctomycetales	Planctomycetaceae		Ca	-0.0553715	0.674335	0.877475
Bacteria	Proteobacteria	Alphaproteobacteria	Rhodospirillales	Rhodospirillaceae	SCTM01	Ca	0.131133	0.317938	0.715765
Bacteria	Proteobacteria	Alphaproteobacteria	Rhizobiales	Rhizobiaceae	Ochrobactrum	Ca	-0.0125425	0.924224	0.979003
Bacteria	Proteobacteria	Gammaproteobacteria	Burkholderiales	Methylophilaceae	Pseudomethylobacillus	Ca	-0.169181	0.196273	0.651772
Bacteria	Actinobacteriota	Actinomycetia	Mycobacteriales	Pseudonocardiaceae	Pseudonocardia	Ca	0.174821	0.181554	0.639106
Bacteria	Bacteroidota	Kapabacteria	Kapabacteriales	Kapabacteriaceae	Kapabacteria	Ca	0.309856	0.0159845	0.398042
Bacteria	Proteobacteria	Alphaproteobacteria	Rhizobiales	Aestuariivirgaceae	Aestuariivirga	Ca	0.0908926	0.489771	0.812066
Bacteria	Proteobacteria	Gammaproteobacteria	Burkholderiales	Burkholderiaceae	Achromobacter	Ca	-0.244173	0.0600889	0.529154
Bacteria	Acidobacteriota	Acidobacteriae	Acidobacteriales	Acidobacteriaceae	Terriglobus	Ca	0.057794	0.660937	0.87533
Bacteria	Chloroflexota	Dehalococcoidia	UBA2979	UBA2979	RBC038	Ca	0.0134	0.919061	0.977993
Bacteria	Bdellovibrionota	Bdellovibrionia	Bdellovibrionales	SG-bin7	SG-bin7	Ca	0.248421	0.0556325	0.52268
Bacteria	Proteobacteria	Gammaproteobacteria	GCA-2729495	GCA-2729495	QUBU01	Ca	0.118089	0.368855	0.744193
Bacteria	Proteobacteria	Alphaproteobacteria	Rhizobiales	Xanthobacteraceae	Z2-YC6860	Ca	0.0323693	0.806052	0.930276
Bacteria	Actinobacteriota	Actinomycetia	Mycobacteriales	Antricoccaceae		Ca	-0.0341705	0.795488	0.926417
Bacteria	Proteobacteria	Alphaproteobacteria	Sphingomonadales	Sphingomonadaceae	Sphingosinicella	Ca	-0.138789	0.290252	0.713923
Bacteria	Firmicutes	Moorellia	Thermacetogeniales	Thermacetogeniaceae	Palsa-1188	Ca	-0.380324	0.00272176	0.308967
Bacteria	Actinobacteriota	Thermoleophilia	Gaiellales	Gaiellaceae	Palsa-739	Ca	0.083311	0.526831	0.817402
Bacteria	Proteobacteria	Gammaproteobacteria	Xanthomonadales	Xanthomonadaceae	Stenotrophomonas	Ca	0.112225	0.393268	0.758297
Bacteria	Bdellovibrionota	Oligoflexia	Oligoflexales	Bin106	Bin106	Ca	0.211071	0.10548	0.583132
Bacteria	Proteobacteria	Gammaproteobacteria	Immundisolibacterales	Immundisolibacteraceae	Immundisolibacter	Ca	-0.0347909	0.791857	0.926417
Bacteria	Verrucomicrobiota	Verrucomicrobiae	Verrucomicrobiales	Verrucomicrobiaceae		Ca	0.0615509	0.640368	0.864993
Bacteria	Bacteroidota	Bacteroidia	Chitinophagales	Chitinophagaceae	FW021-bin31	Ca	-0.126658	0.334873	0.715765
Bacteria	Armatimonadota	Abditibacteria	Abditibacteriales	Abditibacteriaceae	Abditibacterium	Ca	-0.0590397	0.654088	0.87533
Bacteria	Planctomycetota	Planctomycetia	Pirellulales	Lacipirellulaceae	Pirellulimonas	Ca	-0.065898	0.616899	0.859469
Bacteria	Proteobacteria	Alphaproteobacteria	Caulobacterales	Caulobacteraceae	Caulobacter	Ca	-0.145039	0.26886	0.694058
Bacteria	Chloroflexota	Anaerolineae	Aggregatilineales	A4b	OLB15	Ca	-0.0618197	0.638906	0.864694
Bacteria	Proteobacteria	Alphaproteobacteria	Micavibrionales	Micavibrionaceae	UBA7657	Ca	0.0568765	0.665999	0.87533
Bacteria	Bacteroidota	Bacteroidia	Chitinophagales	Saprospiraceae	OLB9	Ca	-0.00360188	0.97821	0.986704
Bacteria	Actinobacteriota	Actinomycetia	Mycobacteriales	Pseudonocardiaceae	Amycolatopsis	Ca	-0.156859	0.231348	0.694058
Bacteria	Planctomycetota	Planctomycetia	Pirellulales	Pirellulaceae	Anatilimnocola	Ca	-0.0285182	0.828756	0.939256
Bacteria	Bacteroidota	Bacteroidia	Chitinophagales	Chitinophagaceae	Flavitalea	Ca	-0.0640222	0.62698	0.859469
Bacteria	Planctomycetota	Phycisphaerae	Phycisphaerales	UBA1924		Ca	0.308798	0.0163675	0.398042
Bacteria	Proteobacteria	Alphaproteobacteria	Caulobacterales	Caulobacteraceae	Brevundimonas	Ca	0.00177085	0.989286	0.992133
Bacteria	Bacteroidota	Bacteroidia	Chitinophagales	Chitinophagaceae	Flavisolibacter	Ca	-0.136759	0.297433	0.715765
Bacteria	Proteobacteria	Gammaproteobacteria	Xanthomonadales	Xanthomonadaceae	Arenimonas	Ca	-0.115812	0.378225	0.744697
Bacteria	Bacteroidota	Kapabacteria	Kapabacteriales			Ca	-0.0227232	0.863176	0.954208
Bacteria	Hydrogenedentota	Hydrogenedentia	Hydrogenedentiales	CAITNO01	SLFT01	Ca	-0.00931167	0.943706	0.983204
Bacteria	Proteobacteria	Alphaproteobacteria	Rhizobiales	Xanthobacteraceae	Rhodoplanes	Ca	-0.0447209	0.734392	0.902771
Bacteria	Myxococcota	Polyangia	Nannocystales	Nannocystaceae	Nannocystis	Ca	-0.0161139	0.902741	0.970451
Bacteria	Chloroflexota	Chloroflexia	Chloroflexales	Chloroflexaceae	JAAUSQ01	Ca	0.233315	0.0728001	0.535932
Bacteria	Chloroflexota					Ca	0.0791284	0.547856	0.817402
Bacteria	Myxococcota	Polyangia	Polyangiales	SG8-38		Ca	-0.116133	0.376895	0.744697
Bacteria	Proteobacteria	Alphaproteobacteria	Rhizobiales	Phreatobacteraceae	Phreatobacter	Ca	-0.161744	0.216959	0.676672
Bacteria	Verrucomicrobiota	Verrucomicrobiae	Opitutales	Opitutaceae	Palsa-1447	Ca	-0.147469	0.260835	0.694058
Bacteria	Myxococcota	UBA4151	UBA4151	UBA4151	CACGMS01	Ca	0.0775405	0.555942	0.8227
Bacteria	Bacteroidota	Bacteroidia	Flavobacteriales	PHOS-HE28	PHOS-HE28	Ca	0.0768057	0.559703	0.824764
Bacteria	Actinobacteriota	Actinomycetia	Streptosporangiales	Streptosporangiaceae	Actinoallomurus	Ca	-0.0178807	0.892137	0.962648
Bacteria	Bacteroidota	Bacteroidia	Chitinophagales	LD1	UBA7692	Ca	0.233864	0.0721101	0.535932
Bacteria	Bacteroidota	Bacteroidia	Cytophagales	Spirosomaceae	Ravibacter	Ca	0.00403734	0.975576	0.986704
Bacteria	Sumerlaeota	Sumerlaeia	Sumerlaeales	Sumerlaeaceae		Ca	0.0100186	0.939441	0.981694
Bacteria	Proteobacteria	Alphaproteobacteria	Rhizobiales	Xanthobacteraceae	Variibacter	Ca	0.145986	0.265713	0.694058
Bacteria	Dependentiae	Babeliae	Babeliales	Babeliaceae	Babela	Ca	-0.176174	0.178144	0.633503
Bacteria	Proteobacteria	Gammaproteobacteria	Xanthomonadales	Xanthomonadaceae	Lysobacter	Ca	-0.0677831	0.606837	0.859469
Bacteria	Verrucomicrobiota	Verrucomicrobiae	Chthoniobacterales	Chthoniobacteraceae	VFJQ01	Ca	-0.0836613	0.525089	0.817402
Bacteria	Acidobacteriota	Vicinamibacteria	Fen-336	Fen-336	WYBL01	Ca	-0.00481157	0.970894	0.986704
Bacteria	Bacteroidota	Bacteroidia				Ca	0.0347912	0.791855	0.926417
Bacteria	Firmicutes	Bacilli	Bacillales	DSM-18226		Ca	-0.165728	0.205694	0.660687
Bacteria	Patescibacteria	Saccharimonadia	UBA4664	SCTI01	SCTI01	Ca	0.156395	0.232749	0.694058
Bacteria	Proteobacteria	Gammaproteobacteria	Pseudomonadales	Cellvibrionaceae	Cellvibrio	Ca	0.0907712	0.490354	0.812066
Bacteria	Bacteroidota	Bacteroidia	Flavobacteriales	Flavobacteriaceae	Flavobacterium	Ca	0.0856313	0.515343	0.817402
Bacteria	Chlamydiota	Chlamydiia	Chlamydiales	Parachlamydiaceae	Neochlamydia	Ca	0.0261991	0.842495	0.941057
Bacteria	Proteobacteria	Alphaproteobacteria	Rhizobiales	Hyphomicrobiaceae		Ca	-0.162288	0.215395	0.676672
Bacteria	Proteobacteria	Alphaproteobacteria	Rhizobiales	Rhizobiaceae	Neorhizobium	Ca	0.0462793	0.725494	0.897618
Bacteria	Proteobacteria	Gammaproteobacteria	Burkholderiales	Burkholderiaceae	Giesbergeria	Ca	-0.194856	0.135716	0.623788
Bacteria	Bacteroidota	Bacteroidia	Cytophagales	Spirosomaceae	Emticicia	Ca	0.151275	0.248592	0.694058
Bacteria	Actinobacteriota	Actinomycetia	Actinomycetales	Microbacteriaceae	Frigoribacterium	Ca	0.192175	0.141286	0.623788
Bacteria	Chloroflexota	Anaerolineae	Aggregatilineales	A4b	OLB13	Ca	0.0107843	0.934821	0.980196
Bacteria	Chloroflexota	Dehalococcoidia	UBA2979	UBA2979	VXMT01	Ca	-0.0753086	0.567403	0.83084
Bacteria	Planctomycetota	Phycisphaerae	Tepidisphaerales	Tepidisphaeraceae	Tepidisphaera	Ca	-0.234173	0.0717228	0.535932
Bacteria	Proteobacteria	Alphaproteobacteria	Ferrovibrionales	Ferrovibrionaceae	Ferrovibrio	Ca	0.00460775	0.972127	0.986704
Bacteria	Proteobacteria	Alphaproteobacteria	Micavibrionales	Micavibrionaceae		Ca	0.163906	0.210792	0.667828
Bacteria	Actinobacteriota	Actinomycetia	Actinomycetales	Demequinaceae	Demequina	Ca	0.00803178	0.951434	0.985363
Bacteria	Bacteroidota	Bacteroidia	Chitinophagales	Chitinophagaceae	UBA1930	Ca	0.140156	0.28548	0.713923
Bacteria	Myxococcota	Polyangia	Polyangiales	Polyangiaceae	Sorangium	Ca	-0.0711294	0.589155	0.846683
Bacteria	Patescibacteria					Ca	-0.116217	0.376546	0.744697
Bacteria	Proteobacteria	Gammaproteobacteria	Burkholderiales	WYBJ01	WYBJ01	Ca	-0.133402	0.309564	0.715765
Bacteria	Actinobacteriota	Acidimicrobiia	Acidimicrobiales	JAAYBP01	Aquihabitans	Ca	0.229898	0.0772157	0.536264
Bacteria	Proteobacteria	Alphaproteobacteria	Caulobacterales	TH1-2		Ca	0.0182006	0.890219	0.962648
Bacteria	Bacteroidota	UBA10030	UBA10030	UBA8401	SpSt-333	Ca	-0.106387	0.418494	0.779921
Bacteria	Proteobacteria	Alphaproteobacteria	Rickettsiales			Ca	0.44579	0.000357538	0.0793674
Bacteria	Chloroflexota	Anaerolineae	Anaerolineales	UBA6663	SpSt-583	Ca	-0.219052	0.0926528	0.567895
Bacteria	Chloroflexota	Chloroflexia	Chloroflexales	Roseiflexaceae	SDU3-3	Ca	-0.132235	0.313851	0.715765
Bacteria	Planctomycetota	Brocadiae	Brocadiales			Ca	-0.0184447	0.888756	0.962648
Bacteria	Proteobacteria	Gammaproteobacteria	Burkholderiales	Casimicrobiaceae	VBCG01	Ca	0.112959	0.390161	0.7575
Bacteria	Verrucomicrobiota	Verrucomicrobiae	Chthoniobacterales	Chthoniobacteraceae		Ca	0.0441737	0.737524	0.905025
Bacteria	Verrucomicrobiota	Verrucomicrobiae	Chthoniobacterales	UBA10450	Udaeobacter	Ca	0.108204	0.410545	0.769221
Bacteria	Actinobacteriota	Actinomycetia	Sporichthyales	Sporichthyaceae	Sporichthya	Ca	0.241917	0.0625709	0.529154
Bacteria	Bacteroidota	Bacteroidia	Chitinophagales	Chitinophagaceae	Heliimonas	Ca	-0.079868	0.544109	0.817402
Bacteria	Acidobacteriota	Blastocatellia	Pyrinomonadales			Ca	-0.263269	0.042115	0.514985
Bacteria	Chloroflexota	Ktedonobacteria	Ktedonobacterales	Ktedonobacteraceae	CF-154	Ca	0.27308	0.0347659	0.484637
Bacteria	Proteobacteria	Alphaproteobacteria	Rhizobiales	Methyloligellaceae	Methyloceanibacter	Ca	0.232618	0.0736842	0.535932
Bacteria	Bacteroidota	Bacteroidia	Chitinophagales	Chitinophagaceae	Puia	Ca	0.246317	0.0578056	0.52268
Bacteria	Bacteroidota	Bacteroidia	Sphingobacteriales	Sphingobacteriaceae	Daejeonella	Ca	-0.0891848	0.497998	0.817402
Bacteria	Bacteroidota	Kapabacteria	OLB7	OLB7	OLB7	Ca	0.0898306	0.494879	0.815439
Bacteria	Patescibacteria	Paceibacteria	UBA9983	PALSA-1337	C7867-002	Ca	0.0858186	0.514421	0.817402
Bacteria	Proteobacteria	Alphaproteobacteria	Caulobacterales	TH1-2	VFBF01	Ca	0.128447	0.328035	0.715765
Bacteria	Proteobacteria	Alphaproteobacteria	Rhodospirillales	Magnetospirillaceae		Ca	0.166675	0.203079	0.656869
Bacteria	Proteobacteria	Gammaproteobacteria	DSM-16500	DSM-16500		Ca	0.22379	0.0856365	0.561276
Bacteria	Bacteroidota	Bacteroidia	Cytophagales	Spirosomaceae	Leadbetterella	Ca	0.0941331	0.474359	0.809703
Bacteria	Chloroflexota	Anaerolineae	Aggregatilineales	J027	JAAUUD01	Ca	-0.0843391	0.521725	0.817402
Bacteria	Chloroflexota	Dehalococcoidia	Tepidiformales	Tepidiformaceae	Tepidiforma	Ca	0.231829	0.0746947	0.535932
Bacteria	Firmicutes	Bacilli	Thermoactinomycetales	DSM-44946	Planifilum	Ca	0.0957838	0.466609	0.809703
Bacteria	Chlamydiota	Chlamydiia	Chlamydiales	Parachlamydiaceae		Ca	-0.112509	0.392063	0.758297
Bacteria	Chloroflexota	Chloroflexia	Chloroflexales	Herpetosiphonaceae	Herpetosiphon	Ca	0.0300252	0.819854	0.93525
Bacteria	Proteobacteria	Alphaproteobacteria	Rs-D84			Ca	-0.0835595	0.525595	0.817402
Bacteria	Verrucomicrobiota	Verrucomicrobiae	Chthoniobacterales	Xiphinematobacteraceae	Xiphinematobacter	Ca	-0.276498	0.0324701	0.484637
Bacteria	Verrucomicrobiota	Verrucomicrobiae	Opitutales	Opitutaceae	IMCC26134	Ca	0.139817	0.286658	0.713923
Bacteria	Verrucomicrobiota	Verrucomicrobiae	Verrucomicrobiales	Akkermansiaceae		Ca	0.0885093	0.501272	0.817402
Bacteria	Actinobacteriota	Thermoleophilia	Gaiellales	Gaiellaceae	Gaiella	Ca	0.109457	0.405113	0.764773
Bacteria	Firmicutes	Bacilli	Tumebacillales	Tumebacillaceae	Tumebacillus	Ca	-0.129477	0.324139	0.715765
Bacteria	Proteobacteria	Alphaproteobacteria	Dongiales	Dongiaceae	Hypericibacter	Ca	0.028788	0.82716	0.938975
Bacteria	Acidobacteriota	Acidobacteriae	Acidobacteriales	Koribacteraceae	TOLSYN	Ca	0.134728	0.304734	0.715765
Bacteria	Bacteroidota	Bacteroidia	Chitinophagales	Chitinophagaceae	Nemorincola	Ca	0.312888	0.014929	0.398042
Bacteria	Bdellovibrionota	Oligoflexia	Oligoflexales	Oligoflexaceae	Oligoflexus	Ca	-0.077713	0.555061	0.8227
Bacteria	Chloroflexota	Dehalococcoidia				Ca	0.255867	0.0484694	0.52268
Bacteria	Patescibacteria	ABY1	Magasanikbacterales	GWA2-37-8	XYD2-FULL-39-9	Ca	0.0352421	0.789219	0.926417
Bacteria	Proteobacteria	Alphaproteobacteria	Rhodospirillales	UXAT02	Defluviicoccus	Ca	-0.210111	0.10711	0.583132
Bacteria	Proteobacteria	Alphaproteobacteria	Sphingomonadales	Kordiimonadaceae	Kordiimonas	Ca	0.284466	0.027606	0.481035
Bacteria	Verrucomicrobiota	Verrucomicrobiae	Verrucomicrobiales	Akkermansiaceae	Haloferula	Ca	-0.0204624	0.876677	0.962648
Bacteria	Verrucomicrobiota	Verrucomicrobiae	Verrucomicrobiales	Akkermansiaceae	Luteolibacter	Ca	0.049026	0.709901	0.89446
Bacteria	Acidobacteriota	Acidobacteriae	Bryobacterales	Bryobacteraceae	Bryobacter	Ca	-0.0697852	0.59623	0.853331
Bacteria	Actinobacteriota	Thermoleophilia	Solirubrobacterales	70-9	67-14	Ca	0.0472298	0.720085	0.896249
Bacteria	Actinobacteriota	Thermoleophilia	Solirubrobacterales	Solirubrobacteraceae	Solirubrobacter	Ca	-0.13178	0.315535	0.715765
Bacteria	Bacteroidota	Bacteroidia	Chitinophagales	Chitinophagaceae	Terrimonas	Ca	-0.164568	0.20893	0.66495
Bacteria	Chloroflexota	Dehalococcoidia	UBA2979	UBA2979	W-Chloroflexi-9	Ca	0.257629	0.0468904	0.52268
Bacteria	Firmicutes	Bacilli	Paenibacillales			Ca	-0.145515	0.267275	0.694058
Bacteria	Myxococcota	Polyangia	Polyangiales	Polyangiaceae	MWCO01	Ca	-0.146398	0.264352	0.694058
Bacteria	Proteobacteria	Alphaproteobacteria	DSM-16000	Inquilinaceae	Inquilinus	Ca	0.078396	0.551579	0.819724
Bacteria	Proteobacteria	Alphaproteobacteria	Rhizobiales	Aestuariivirgaceae	Nordella	Ca	-0.0942547	0.473786	0.809703
Bacteria	Proteobacteria	Gammaproteobacteria	Burkholderiales	Methylophilaceae	Methylophilus	Ca	-0.265498	0.0403415	0.511237
Bacteria	Acidobacteriota	Acidobacteriae	Acidobacteriales	Acidobacteriaceae	Terracidiphilus	Ca	0.164568	0.20893	0.66495
Bacteria	Actinobacteriota	Actinomycetia	Mycobacteriales			Ca	-0.0685255	0.602894	0.859469
Bacteria	Deinococcota	Deinococci	Deinococcales	Trueperaceae	CSSed10-48	Ca	0.12838	0.328292	0.715765
Bacteria	Planctomycetota	Planctomycetia	Pan216	Pan216	Pan216	Ca	0.139005	0.289493	0.713923
Bacteria	Planctomycetota	UBA1135	UBA1135	GCA-002686595	WYBT01	Ca	-0.0238379	0.856533	0.950643
Bacteria	Proteobacteria	Alphaproteobacteria	Minwuiales	Minwuiaceae	Minwuia	Ca	0.0819241	0.533758	0.817402
Bacteria	Proteobacteria	Alphaproteobacteria	Sphingomonadales			Ca	-0.049562	0.706872	0.89446
Bacteria	Acidobacteriota	Blastocatellia	Pyrinomonadales	Pyrinomonadaceae	PSRF01	Ca	0.245665	0.0584922	0.52268
Bacteria	Bacteroidota	Ignavibacteria	SJA-28	B-1AR	UBA2330	Ca	-0.117594	0.370879	0.744697
Bacteria	Bdellovibrionota	FAC87	UBA2466	UBA2466		Ca	-0.00693997	0.958029	0.986704
Bacteria	Chloroflexota	Anaerolineae	Aggregatilineales	A4b	GCA-2699585	Ca	0.042432	0.747522	0.91053
Bacteria	Chloroflexota	Anaerolineae	Anaerolineales	EnvOPS12	OLB14	Ca	0.024868	0.850404	0.945345
Bacteria	Proteobacteria	Alphaproteobacteria	Rhizobiales	Rhizobiaceae	Aquamicrobium	Ca	-0.0477088	0.717365	0.89446
Bacteria	Proteobacteria					Ca	0.147767	0.25986	0.694058
Bacteria	Acidobacteriota	Acidobacteriae	Acidobacteriales	SbA1	Sulfotelmatobacter	Ca	0.0805748	0.54054	0.817402
Bacteria	Planctomycetota	Planctomycetia	Pirellulales	Lacipirellulaceae	Posidoniimonas	Ca	0.143126	0.275291	0.708036
Bacteria	Acidobacteriota	Acidobacteriae	Acidobacteriales	Acidobacteriaceae	Silvibacterium	Ca	0.0555709	0.673228	0.877475
Bacteria	Bdellovibrionota	Bdellovibrionia	Bdellovibrionales			Ca	0.176198	0.178084	0.633503
Bacteria	Gemmatimonadota	Gemmatimonadetes	Gemmatimonadales	GWC2-71-9	JABFSM01	Ca	-0.092012	0.484418	0.812066
Bacteria	Nitrospirota	Nitrospiria	Nitrospirales	Nitrospiraceae	Nitrospira	Ca	-0.0201573	0.878502	0.962648
Bacteria	Proteobacteria	Alphaproteobacteria	Caulobacterales	TH1-2	Terricaulis	Ca	-0.109036	0.406933	0.764773
Bacteria	Proteobacteria	Alphaproteobacteria	RUG11792	RUG11792	RUG11420	Ca	0.227472	0.0804781	0.539358
Bacteria	Proteobacteria	Alphaproteobacteria	Rhodobacterales	Rhodobacteraceae	Poseidonocella	Ca	0.0093924	0.943219	0.983204
Bacteria	Proteobacteria	Gammaproteobacteria	Burkholderiales	Burkholderiaceae	Hydrogenophaga	Ca	-0.00410975	0.975138	0.986704
Bacteria	Actinobacteriota	Actinomycetia	Streptosporangiales	Streptosporangiaceae	Thermostaphylospora	Ca	-0.00652199	0.960555	0.986704
Bacteria	Chlamydiota	Chlamydiia	Chlamydiales	Rhabdochlamydiaceae	Ga0074140	Ca	0.115987	0.377496	0.744697
Bacteria	Chloroflexota	Chloroflexia	Thermomicrobiales	Thermomicrobiaceae	Sphaerobacter	Ca	-0.0854845	0.516066	0.817402
Bacteria	Dependentiae	Babeliae	Babeliales			Ca	-0.0996517	0.448721	0.795562
Bacteria	Patescibacteria	Gracilibacteria	Peribacterales	Peribacteraceae	VMFU01	Ca	0.0823135	0.531809	0.817402
Bacteria	Patescibacteria	Saccharimonadia	Saccharimonadales	UBA4665	GCA-2746885	Ca	-0.0453171	0.730984	0.900169
Bacteria	Proteobacteria	Alphaproteobacteria	Reyranellales	Reyranellaceae	SYSU-D60007	Ca	0.181097	0.166132	0.633503
Bacteria	Proteobacteria	Gammaproteobacteria	Steroidobacterales	Steroidobacteraceae	Povalibacter	Ca	-0.066508	0.613635	0.859469
Bacteria	Actinobacteriota	Actinomycetia	Mycobacteriales	Micromonosporaceae		Ca	0.0308231	0.81515	0.934473
Bacteria	Bacteroidota	Bacteroidia	Chitinophagales	Chitinophagaceae	Foetidibacter	Ca	-0.126955	0.333732	0.715765
Bacteria	Proteobacteria	Gammaproteobacteria	Methylococcales	Methylococcaceae	Methylocaldum	Ca	0.102405	0.436222	0.786774
Bacteria	Actinobacteriota	Actinomycetia	Actinomycetales	Microbacteriaceae	Leucobacter	Ca	-0.0563813	0.668738	0.87533
Bacteria	Armatimonadota	Fimbriimonadia	Fimbriimonadales	Fimbriimonadaceae		Ca	0.0459056	0.727625	0.897618
Bacteria	Bacteroidota	Bacteroidia	Chitinophagales	Saprospiraceae		Ca	0.183181	0.161228	0.631327
Bacteria	Cyanobacteria	Cyanobacteriia	Cyanobacteriales	Coleofasciculaceae	SIO2C1	Ca	0.172588	0.187282	0.651772
Bacteria	Planctomycetota	Planctomycetia	Pirellulales	Lacipirellulaceae	Bythopirellula	Ca	0.0858579	0.514228	0.817402
Bacteria	Planctomycetota	Planctomycetia	Pirellulales	Lacipirellulaceae	Lacipirellula	Ca	0.171417	0.190339	0.651772
Bacteria	Planctomycetota	Planctomycetia	Planctomycetales			Ca	-0.151842	0.246803	0.694058
Bacteria	Acidobacteriota	Blastocatellia	UBA7656	UBA7656	QHVH01	Ca	-0.065366	0.619751	0.859469
Bacteria	Actinobacteriota	Actinomycetia	Nitriliruptorales	Nitriliruptoraceae	CSBr16-57R1	Ca	0.21583	0.0976761	0.567895
Bacteria	Armatimonadota	Fimbriimonadia	Fimbriimonadales	Fimbriimonadaceae	55-13	Ca	0.0478193	0.716737	0.89446
Bacteria	Bdellovibrionota	Bdellovibrionia	Bdellovibrionales	Bdellovibrionaceae	Ga0074137	Ca	0.0931461	0.479026	0.812066
Bacteria	Bdellovibrionota	UBA2361	UBA2361	RFPC01	RFPC01	Ca	-0.0800405	0.543237	0.817402
Bacteria	Elusimicrobiota	Elusimicrobia				Ca	-0.124622	0.342765	0.715765
Bacteria	Fibrobacterota	Chitinivibrionia	Chitinivibrionales	Chitinispirillaceae	Chitinispirillum	Ca	0.200248	0.125012	0.606361
Bacteria	Firmicutes	Symbiobacteriia	Symbiobacteriales	Symbiobacteriaceae	Symbiobacterium	Ca	-0.0657014	0.617952	0.859469
Bacteria	Patescibacteria	ABY1	SG8-24	2-12-FULL-60-25	SZUA-46	Ca	-0.0464941	0.724271	0.897618
Bacteria	Patescibacteria	Doudnabacteria	UBA920	O2-02-FULL-48-8	O2-12-FULL-42-9	Ca	-0.23631	0.0690967	0.535932
Bacteria	Proteobacteria	Alphaproteobacteria	Acetobacterales	Acetobacteraceae	Roseomonas	Ca	-0.0563813	0.668738	0.87533
Bacteria	Proteobacteria	Gammaproteobacteria	Pseudomonadales	Porticoccaceae	SZUA-272	Ca	-0.235417	0.0701852	0.535932
Bacteria	Verrucomicrobiota	Verrucomicrobiae	Pedosphaerales			Ca	-0.211378	0.104962	0.583132
Bacteria	Chlamydiota	Chlamydiia	Chlamydiales	Parachlamydiaceae	Rubidus	Ca	0.0515505	0.695672	0.891895
Bacteria	Proteobacteria	Alphaproteobacteria	Reyranellales	Reyranellaceae		Ca	0.0842498	0.522168	0.817402
Bacteria	Acidobacteriota	Acidobacteriae	Acidobacteriales	Acidobacteriaceae		Ca	-0.00375875	0.977261	0.986704
Bacteria	Acidobacteriota	UBA6911	UBA6911	UBA6911	Gp18-AA60	Ca	0.0536131	0.684124	0.886309
Bacteria	Actinobacteriota	Acidimicrobiia	Acidimicrobiales	Ilumatobacteraceae		Ca	-0.0428905	0.744887	0.909257
Bacteria	Bacteroidota	Bacteroidia	Cytophagales	Spirosomaceae	Persicitalea	Ca	-0.142054	0.278941	0.712167
Bacteria	Bacteroidota	Bacteroidia	Flavobacteriales	Flavobacteriaceae	Aequorivita	Ca	0.308905	0.0163284	0.398042
Bacteria	Chloroflexota	Anaerolineae	Anaerolineales	UBA11579	OMJR01	Ca	-0.147968	0.259206	0.694058
Bacteria	Chloroflexota	Dehalococcoidia	UBA2985	UBA2985	VEXC01	Ca	-0.0263113	0.84183	0.941057
Bacteria	Desulfobacterota	DSM-4660	Desulfatiglandales	HGW-15		Ca	0.208525	0.109847	0.583132
Bacteria	Firmicutes	Halanaerobiia	Halanaerobiales			Ca	-0.0128653	0.92228	0.979003
Bacteria	Planctomycetota	Phycisphaerae	Phycisphaerales	SM1A02	UBA966	Ca	0.157236	0.230216	0.694058
Bacteria	Proteobacteria	Alphaproteobacteria	ATCC43930	Stellaceae	URHD0088	Ca	0.12331	0.34791	0.719564
Bacteria	Actinobacteriota	Acidimicrobiia	UBA5794	UBA5794	SZUA-442	Ca	-0.16819	0.198946	0.654082
Bacteria	Desulfobacterota	Binatia	UBA9968	UBA9968		Ca	0.247567	0.0565059	0.52268
Bacteria	Firmicutes	Sulfobacillia	Sulfobacillales	Sulfobacillaceae		Ca	-0.152392	0.245075	0.694058
Bacteria	Patescibacteria	UBA1384				Ca	0.0186725	0.887391	0.962648
Bacteria	Planctomycetota	UBA8108	UBA1146			Ca	-0.0151651	0.908442	0.971141
Bacteria	Proteobacteria	Alphaproteobacteria	Azospirillales	Azospirillaceae	Indioceanicola	Ca	0.0549597	0.676623	0.878224
Bacteria	Proteobacteria	Alphaproteobacteria	Paracaedibacterales	UBA11393	Finniella	Ca	0.0037108	0.977551	0.986704
Bacteria	Proteobacteria	Alphaproteobacteria	UBA9219	UBA9219	UBA8914	Ca	-0.111023	0.398388	0.760756
Bacteria	Proteobacteria	Gammaproteobacteria	Burkholderiales	SG8-39	VBDM01	Ca	0.129269	0.324924	0.715765
Bacteria	Proteobacteria	Gammaproteobacteria	Methylococcales	Methylococcaceae		Ca	-0.097191	0.460057	0.807707
Bacteria	Actinobacteriota	Actinomycetia	Propionibacteriales	Nocardioidaceae		Ca	0.154109	0.239735	0.694058
Bacteria	Firmicutes	Bacilli	Bacillales	DSM-18226	Bacillus	Ca	0.169144	0.196373	0.651772
Bacteria	Firmicutes	UBA4882	UBA8346	UBA8346	Hydrogenispora	Ca	0.00821949	0.9503	0.985363
Bacteria	Proteobacteria	Gammaproteobacteria	Nevskiales	Nevskiaceae	Alkanibacter	Ca	-0.240509	0.0641607	0.532381
Bacteria	Actinobacteriota	Actinomycetia	Mycobacteriales	Micromonosporaceae	Micromonospora	Ca	-0.109004	0.407075	0.764773
Bacteria	Armatimonadota	Armatimonadia	Armatimonadales	Capsulimonadaceae	Capsulimonas	Ca	-0.0268065	0.838892	0.941057
Bacteria	Bacteroidota	Bacteroidia	Cytophagales	Cyclobacteriaceae	Imperialibacter	Ca	-0.0828203	0.529277	0.817402
Bacteria	Bdellovibrionota	Bdellovibrionia	UBA1018	UBA923	UBA923	Ca	0.0338288	0.797489	0.926417
Bacteria	Chloroflexota	Dehalococcoidia	UBA2979	UBA2979	SURF-43	Ca	0.124039	0.345046	0.715765
Bacteria	Chloroflexota	Limnocylindria	QHBO01	QHBO01	CF-167	Ca	0.0913051	0.487795	0.812066
Bacteria	Dependentiae	Babeliae	Babeliales	Vermiphilaceae		Ca	0.150117	0.252276	0.694058
Bacteria	Gemmatimonadota	Gemmatimonadetes	Gemmatimonadales	GWC2-71-9		Ca	-0.184179	0.158919	0.627752
Bacteria	Hydrogenedentota	Hydrogenedentia	Hydrogenedentiales			Ca	0.126669	0.334831	0.715765
Bacteria	Proteobacteria	Alphaproteobacteria	Micavibrionales	Micavibrionaceae	Micavibrio	Ca	0.131918	0.315024	0.715765
Bacteria	Proteobacteria	Alphaproteobacteria	Rhizobiales	Kaistiaceae		Ca	-0.139074	0.289254	0.713923
Bacteria	Proteobacteria	Alphaproteobacteria	Rickettsiales	Anaplasmataceae		Ca	-0.0907404	0.490502	0.812066
Bacteria	Proteobacteria	Gammaproteobacteria	Coxiellales	Coxiellaceae		Ca	-0.13035	0.320859	0.715765
Bacteria	Proteobacteria	Gammaproteobacteria	Methylococcales	Methylococcaceae	UBA6136	Ca	0.204862	0.116374	0.592064
Bacteria	Verrucomicrobiota	Verrucomicrobiae	Opitutales	Opitutaceae		Ca	-0.0305895	0.816526	0.934513
Bacteria	Actinobacteriota	Acidimicrobiia	Acidimicrobiales			Ca	0.0515505	0.695672	0.891895
Bacteria	Actinobacteriota	Thermoleophilia	Gaiellales	Gaiellaceae		Ca	-0.221766	0.0885801	0.561276
Bacteria	Bacteroidota	Bacteroidia	Chitinophagales	Saprospiraceae	Lewinella	Ca	0.0638988	0.627646	0.859469
Bacteria	Bacteroidota	Kapabacteria	Kapabacteriales	UBA2268	PGYR01	Ca	0.0937201	0.476309	0.809726
Bacteria	Chlamydiota	Chlamydiia	Chlamydiales	Parachlamydiaceae	Protochlamydia	Ca	-0.0902751	0.492738	0.813835
Bacteria	Chloroflexota	Anaerolineae	Anaerolineales	UBA4823	UTCFX2	Ca	-0.0602167	0.647642	0.869763
Bacteria	Chloroflexota	Chloroflexia				Ca	0.130172	0.321529	0.715765
Bacteria	Deinococcota	Deinococci	Deinococcales	Deinococcaceae	Deinococcus	Ca	-0.0856793	0.515107	0.817402
Bacteria	Eremiobacterota	Eremiobacteria	Baltobacterales	Baltobacteraceae		Ca	-0.0338288	0.797489	0.926417
Bacteria	Firmicutes	Bacilli	Bacillales	DSM-18226	Robertmurraya	Ca	0.131556	0.316364	0.715765
Bacteria	Firmicutes	Bacilli	Paenibacillales	Paenibacillaceae		Ca	0.172163	0.188389	0.651772
Bacteria	Firmicutes	Clostridia	Lachnospirales	Lachnospiraceae		Ca	0.00890244	0.946177	0.984306
Bacteria	Myxococcota	WYAZ01	WYAZ01	WYAZ01	WYAZ01	Ca	-0.146853	0.262852	0.694058
Bacteria	Nitrospirota	Nitrospiria	Nitrospirales	Nitrospiraceae	Palsa-1315	Ca	-0.101486	0.44037	0.786774
Bacteria	Patescibacteria	Paceibacteria	UBA9983	UBA6065	UBA6065	Ca	0.0768111	0.559676	0.824764
Bacteria	Patescibacteria	Paceibacteria	UBA9983	Zambryskibacteraceae	C7867-005	Ca	0.113643	0.387277	0.754
Bacteria	Planctomycetota	B15-G4	B15-G4	B15-G4	B15-G4	Ca	-0.0178685	0.89221	0.962648
Bacteria	Planctomycetota	Planctomycetia	Pirellulales	UBA1268		Ca	0.0345797	0.793092	0.926417
Bacteria	Proteobacteria	Alphaproteobacteria	Geminicoccales	Geminicoccaceae		Ca	0.257574	0.0469389	0.52268
Bacteria	Proteobacteria	Alphaproteobacteria	Rhizobiales	Stappiaceae	Pseudovibrio	Ca	-0.221766	0.0885801	0.561276
Bacteria	Proteobacteria	Alphaproteobacteria	Rhizobiales			Ca	-0.0563813	0.668738	0.87533
Bacteria	Proteobacteria	Alphaproteobacteria	Rhodospirillales	Rhodospirillaceae	GCA-2737725	Ca	0.146591	0.263714	0.694058
Bacteria	Proteobacteria	Gammaproteobacteria	Berkiellales			Ca	0.176661	0.176928	0.633503
Bacteria	Proteobacteria	Gammaproteobacteria	Burkholderiales	Burkholderiaceae	Cupriavidus	Ca	0.169144	0.196373	0.651772
Bacteria	Proteobacteria	Gammaproteobacteria	Burkholderiales			Ca	0.0174217	0.89489	0.964047
Bacteria	Proteobacteria	Gammaproteobacteria	Steroidobacterales	Steroidobacteraceae	Steroidobacter	Ca	-0.0939688	0.475134	0.809703
Bacteria	Proteobacteria	Gammaproteobacteria	VBWC01	VBWC01	VBWC01	Ca	-0.187083	0.152337	0.627752
Bacteria	Verrucomicrobiota	Verrucomicrobiae	Chthoniobacterales			Ca	0.029483	0.823054	0.935838
Bacteria	Verrucomicrobiota	Verrucomicrobiae	Opitutales			Ca	0.0622435	0.636604	0.863255
Bacteria	Acidobacteriota	Blastocatellia	Pyrinomonadales	Blastocatellaceae	Aridibacter	Ca	-0.146591	0.263714	0.694058
Bacteria	Actinobacteriota	Actinomycetia	Mycobacteriales	Mycobacteriaceae	Rhodococcus	Ca	0.184179	0.158919	0.627752
Bacteria	Actinobacteriota	UBA4738	UBA4738	HRBIN12	AC-51	Ca	-0.101486	0.44037	0.786774
Bacteria	Armatimonadota	Armatimonadia	Armatimonadales	Armatimonadaceae	Armatimonas	Ca	0.235898	0.069598	0.535932
Bacteria	Bacteroidota	Bacteroidia	Chitinophagales	Chitinophagaceae	Ferruginibacter	Ca	-0.146591	0.263714	0.694058
Bacteria	Bacteroidota	Bacteroidia	Chitinophagales	Chitinophagaceae	VBAR01	Ca	0.176661	0.176928	0.633503
Bacteria	Bacteroidota					Ca	0.0563813	0.668738	0.87533
Bacteria	Chlamydiota	Chlamydiia	Chlamydiales			Ca	-0.273427	0.0345268	0.484637
Bacteria	Chloroflexota	Anaerolineae	Aggregatilineales			Ca	-0.146591	0.263714	0.694058
Bacteria	Chloroflexota	Anaerolineae	UBA4142	UBA4142	UBA4142	Ca	0.0410975	0.755212	0.91053
Bacteria	Chloroflexota	Dehalococcoidia	DSGV01	DSGV01	DSGV01	Ca	0.131556	0.316364	0.715765
Bacteria	Cyanobacteria	Cyanobacteriia	GCF-001939115	GCF-001939115	GCF-001939115	Ca	0.101486	0.44037	0.786774
Bacteria	Deinococcota	Deinococci	Deinococcales	Trueperaceae	JAABTL01	Ca	0.233671	0.0723523	0.535932
Bacteria	Desulfobacterota	Binatia	Bin18	Bin18	JABFSC01	Ca	-0.0939688	0.475134	0.809703
Bacteria	Desulfobacterota	Binatia	HRBIN30	HRBIN30	HRBIN30	Ca	-0.0321678	0.807237	0.930276
Bacteria	Eisenbacteria	RBG-16-71-46	RBG-16-71-46	RBG-16-71-46	RBG-16-71-46	Ca	0.176661	0.176928	0.633503
Bacteria	Elusimicrobiota	Elusimicrobia	UBA1565	UBA9628	GWA2-66-18	Ca	-0.0804196	0.541323	0.817402
Bacteria	Eremiobacterota	Xenobia	Xenobiales			Ca	0.0606984	0.645012	0.869141
Bacteria	Firmicutes	Bacilli	Alicyclobacillales	Alicyclobacillaceae		Ca	0.0187938	0.886665	0.962648
Bacteria	Firmicutes	Bacilli	Thermoactinomycetales	Thermoactinomycetaceae	Thermoflavimicrobium	Ca	-0.184179	0.158919	0.627752
Bacteria	Gemmatimonadota	Gemmatimonadetes	Gemmatimonadales	Gemmatimonadaceae	SCN-70-22	Ca	0.0638988	0.627646	0.859469
Bacteria	Myxococcota	UBA9042	UBA9042			Ca	0.184179	0.158919	0.627752
Bacteria	Patescibacteria	Paceibacteria	UBA9983	SBAW01	GWA1-54-10	Ca	-0.0268065	0.838892	0.941057
Bacteria	Patescibacteria	Paceibacteria	UBA9983	XYD1-FULL-46-19		Ca	0.225504	0.0832038	0.552315
Bacteria	Planctomycetota	Phycisphaerae	Phycisphaerales	UBA1924	UBA6054	Ca	-0.0107226	0.935194	0.980196
Bacteria	Proteobacteria	Alphaproteobacteria	Azospirillales	Azospirillaceae		Ca	0.193247	0.139038	0.623788
Bacteria	Proteobacteria	Alphaproteobacteria	Micropepsales			Ca	0.0375292	0.775886	0.926417
Bacteria	Proteobacteria	Alphaproteobacteria	Paracaedibacterales	Paracaedibacteraceae		Ca	0.0911422	0.488575	0.812066
Bacteria	Proteobacteria	Alphaproteobacteria	Rhizobiales	Beijerinckiaceae	Chelatococcus	Ca	-0.214249	0.100217	0.567895
Bacteria	Proteobacteria	Alphaproteobacteria	Rhodobacterales	Rhodobacteraceae	Amaricoccus	Ca	0.117949	0.369427	0.744193
Bacteria	Proteobacteria	Gammaproteobacteria	Burkholderiales	Burkholderiaceae	Comamonas	Ca	-0.0563813	0.668738	0.87533
Bacteria	Proteobacteria	Gammaproteobacteria	Burkholderiales	Rhodocyclaceae		Ca	-0.0112763	0.931855	0.979643
Bacteria	Verrucomicrobiota	Kiritimatiellae	SLAD01	WLWN01	WLWN01	Ca	-0.0865964	0.510602	0.817402
Bacteria	Acidobacteriota	Acidobacteriae	20CM-2-55-15	20CM-2-55-15	DSPE01	Ca	0.246674	0.0574318	0.52268
Bacteria	Acidobacteriota	Mor1	Mor1	Mor1	Mor1	Ca	-0.131556	0.316364	0.715765
Bacteria	Actinobacteriota	Actinomycetia	Mycobacteriales	Mycobacteriaceae		Ca	-0.0338607	0.797302	0.926417
Bacteria	Actinobacteriota	Thermoleophilia	Gaiellales	Gaiellaceae	GMQP-bins7	Ca	-0.131556	0.316364	0.715765
Bacteria	Actinobacteriota	Thermoleophilia	Miltoncostaeales	Miltoncostaeaceae	Miltoncostaea	Ca	0.124039	0.345046	0.715765
Bacteria	Bacteroidota	Bacteroidia	Chitinophagales	Saprospiraceae	UBA2329	Ca	-0.0714163	0.58765	0.846683
Bacteria	Bacteroidota	Bacteroidia	Cytophagales	Hymenobacteraceae	Adhaeribacter	Ca	-0.131556	0.316364	0.715765
Bacteria	Bacteroidota	Bacteroidia	Flavobacteriales	Flavobacteriaceae		Ca	0.0864513	0.511314	0.817402
Bacteria	Bacteroidota	Bacteroidia	Flavobacteriales	Weeksellaceae	Kaistella	Ca	-0.0477088	0.717365	0.89446
Bacteria	Bacteroidota	Ignavibacteria	Ignavibacteriales	Ignavibacteriaceae		Ca	-0.0825523	0.530615	0.817402
Bacteria	Bdellovibrionota	Bdellovibrionia	Bdellovibrionales	Bdellovibrionaceae		Ca	0.215047	0.0989279	0.567895
Bacteria	Bdellovibrionota	Oligoflexia	Silvanigrellales	Silvanigrellaceae	Silvanigrella	Ca	0.0413463	0.753776	0.91053
Bacteria	Chloroflexota	Anaerolineae	Promineofilales	Promineofilaceae	Promineofilum	Ca	0.189584	0.146831	0.627752
Bacteria	Deinococcota	Deinococci	Deinococcales	Trueperaceae	Truepera	Ca	-0.199769	0.125936	0.606361
Bacteria	Dependentiae	Babeliae	Babeliales	GWF2-32-72	GWF2-32-72	Ca	0.115252	0.380551	0.747013
Bacteria	Desulfobacterota	Syntrophobacteria	Syntrophobacterales	Syntrophobacteraceae	Desulfovirga	Ca	-0.0939688	0.475134	0.809703
Bacteria	Firmicutes	Bacilli	Thermoactinomycetales	DSM-45169		Ca	0.191696	0.142299	0.623788
Bacteria	Firmicutes	Clostridia	Peptostreptococcales			Ca	0.101486	0.44037	0.786774
Bacteria	Firmicutes	Desulfotomaculia	Desulfotomaculales			Ca	0.101486	0.44037	0.786774
Bacteria	Firmicutes	Limnochordia	Limnochordales	ZCTH02-B6	ZCTH02-B6	Ca	-0.0939688	0.475134	0.809703
Bacteria	Firmicutes	Limnochordia				Ca	-0.0864513	0.511314	0.817402
Bacteria	Firmicutes	UBA4882	UBA10575	UBA10575	Capillibacterium	Ca	0.0789338	0.548844	0.817402
Bacteria	Gemmatimonadota	Gemmatimonadetes	Longimicrobiales	UBA6960	UBA2982	Ca	0.0638988	0.627646	0.859469
Bacteria	Myxococcota	Polyangia	Polyangiales	Polyangiaceae	Polyangium	Ca	0.0338288	0.797489	0.926417
Bacteria	Myxococcota	UBA9160	UBA9160	PR03	CAADGG01	Ca	0.169144	0.196373	0.651772
Bacteria	Nitrospirota	Nitrospiria	Nitrospirales	Nitrospiraceae	40CM-3-62-11	Ca	-0.0714163	0.58765	0.846683
Bacteria	Patescibacteria	Paceibacteria	UBA9983	UBA918		Ca	0.279195	0.0307496	0.484637
Bacteria	Patescibacteria	Paceibacteria	UBA9983	Zambryskibacteraceae	UBA910	Ca	-0.156349	0.232889	0.694058
Bacteria	Patescibacteria	Saccharimonadia	Saccharimonadales	UBA1020	UBA1020	Ca	-0.148219	0.258391	0.694058
Bacteria	Patescibacteria	Saccharimonadia	Saccharimonadales	UBA4665	UBA4665	Ca	-0.0789338	0.548844	0.817402
Bacteria	Planctomycetota	Phycisphaerae	UBA1845	UTPLA1	ECT2AJA-110-A	Ca	0.0624503	0.635482	0.863255
Bacteria	Planctomycetota	Planctomycetia	Gemmatales	Gemmataceae	Fimbriiglobus	Ca	0.124039	0.345046	0.715765
Bacteria	Planctomycetota	Planctomycetia	Planctomycetales	Planctomycetaceae	MB-PLM-1	Ca	0.0864513	0.511314	0.817402
Bacteria	Proteobacteria	Alphaproteobacteria	Acetobacterales	Acetobacteraceae	Acidisoma	Ca	-0.206731	0.113007	0.583132
Bacteria	Proteobacteria	Alphaproteobacteria	Holosporales	Holosporaceae		Ca	0.0259093	0.844216	0.94147
Bacteria	Proteobacteria	Alphaproteobacteria	Kiloniellales			Ca	0.154109	0.239735	0.694058
Bacteria	Proteobacteria	Alphaproteobacteria	Rhizobiales	Labraceae	Labrys	Ca	0.199214	0.127014	0.606361
Bacteria	Sumerlaeota	Sumerlaeia	Sumerlaeales			Ca	0.0338288	0.797489	0.926417
Bacteria	Verrucomicrobiota	Verrucomicrobiae	Chthoniobacterales	UBA10450		Ca	-0.0714163	0.58765	0.846683
Bacteria	Acidobacteriota	Acidobacteriae				Ca	0.169144	0.196373	0.651772
Bacteria	Acidobacteriota	Blastocatellia	Pyrinomonadales	Blastocatellaceae	Stenotrophobacter	Ca	0.184179	0.158919	0.627752
Bacteria	Acidobacteriota	Blastocatellia	Pyrinomonadales	Blastocatellaceae		Ca	-0.0112763	0.931855	0.979643
Bacteria	Acidobacteriota	Thermoanaerobaculia	UBA5066	Gp7-AA6	Gp7-AA6	Ca	0.131556	0.316364	0.715765
Bacteria	Actinobacteriota	Actinomycetia	Mycobacteriales	Geodermatophilaceae	Modestobacter	Ca	0.0413463	0.753776	0.91053
Bacteria	Bacteroidota	Bacteroidia	AKYH767	B-17BO		Ca	0.0638988	0.627646	0.859469
Bacteria	Bacteroidota	Bacteroidia	Bacteroidales	Prolixibacteraceae	Tangfeifania	Ca	0.0488638	0.710819	0.89446
Bacteria	Bacteroidota	Bacteroidia	Cytophagales	Spirosomaceae	Larkinella	Ca	-0.101486	0.44037	0.786774
Bacteria	Bacteroidota	Bacteroidia	Cytophagales			Ca	0.0263113	0.84183	0.941057
Bacteria	Chlamydiota	Chlamydiia	Chlamydiales	Rhabdochlamydiaceae		Ca	-0.0789338	0.548844	0.817402
Bacteria	Chloroflexota	Dehalococcoidia	Tepidiformales	Tepidiformaceae	SLAK01	Ca	0.124039	0.345046	0.715765
Bacteria	Chloroflexota	Ktedonobacteria	Ktedonobacterales	Ktedonobacteraceae	UBA11361	Ca	0.154109	0.239735	0.694058
Bacteria	Cyanobacteria	Cyanobacteriia	Cyanobacteriales	Microcoleaceae	Microcoleus	Ca	-0.101486	0.44037	0.786774
Bacteria	Deinococcota	Deinococci	Deinococcales	Trueperaceae		Ca	-0.146591	0.263714	0.694058
Bacteria	Dependentiae	Babeliae	Babeliales	Babeliaceae		Ca	0.124039	0.345046	0.715765
Bacteria	Firmicutes	Bacilli	Bacillales	Anoxybacillaceae		Ca	-0.214249	0.100217	0.567895
Bacteria	Firmicutes	Bacilli	Thermoactinomycetales			Ca	-0.0563813	0.668738	0.87533
Bacteria	Firmicutes	Clostridia	Clostridiales	Clostridiaceae	Clostridium	Ca	-0.101486	0.44037	0.786774
Bacteria	Firmicutes	Clostridia	Clostridiales	Oxobacteraceae	Oxobacter	Ca	-0.00375875	0.977261	0.986704
Bacteria	Firmicutes	Clostridia	Lachnospirales	Defluviitaleaceae	Defluviitalea	Ca	0.0638988	0.627646	0.859469
Bacteria	Firmicutes	Clostridia	Tissierellales	Sedimentibacteraceae	Sedimentibacter	Ca	0.191696	0.142299	0.623788
Bacteria	Firmicutes	Negativicutes	Sporomusales			Ca	-0.0488638	0.710819	0.89446
Bacteria	Gemmatimonadota	Gemmatimonadetes	Longimicrobiales	RSA9	RSA9	Ca	0.0321678	0.807237	0.930276
Bacteria	Methylomirabilota	Methylomirabilia	Rokubacteriales	CSP1-6	GWA2-73-35	Ca	-0.0789338	0.548844	0.817402
Bacteria	Methylomirabilota	Methylomirabilia	Rokubacteriales			Ca	0.0714163	0.58765	0.846683
Bacteria	Omnitrophota	Koll11	UBA10015	GCA-002753745	GCA-2753745	Ca	-0.107226	0.414813	0.775133
Bacteria	Patescibacteria	Gracilibacteria	UBA1369	UBA1369	UBA1369	Ca	0.139074	0.289254	0.713923
Bacteria	Patescibacteria	Paceibacteria	UBA9983	UBA2103	C7867-001	Ca	0.214249	0.100217	0.567895
Bacteria	Patescibacteria	Paceibacteria	UBA9983			Ca	0.150117	0.252276	0.694058
Bacteria	Patescibacteria	Saccharimonadia	Saccharimonadales	Saccharimonadaceae		Ca	-0.0789338	0.548844	0.817402
Bacteria	Planctomycetota	Phycisphaerae	Phycisphaerales	SM1A02		Ca	-0.0939688	0.475134	0.809703
Bacteria	Planctomycetota	UBA1135	UBA1135	GCA-002686595	Pla163	Ca	0.199214	0.127014	0.606361
Bacteria	Proteobacteria	Alphaproteobacteria	ATCC43930	Stellaceae	Stella	Ca	-0.0563813	0.668738	0.87533
Bacteria	Proteobacteria	Alphaproteobacteria	Caedimonadales			Ca	-0.184179	0.158919	0.627752
Bacteria	Proteobacteria	Alphaproteobacteria	Dongiales	Dongiaceae	SYSU-D60009	Ca	0.0338288	0.797489	0.926417
Bacteria	Proteobacteria	Alphaproteobacteria	Micavibrionales	Micavibrionaceae	TMED27	Ca	0.139074	0.289254	0.713923
Bacteria	Proteobacteria	Alphaproteobacteria	Rhizobiales	Rhodomicrobiaceae	Rhodomicrobium	Ca	-0.221766	0.0885801	0.561276
Bacteria	Proteobacteria	Alphaproteobacteria	Rhodospirillales	Magnetospirillaceae	Telmatospirillum	Ca	0.219814	0.0914956	0.567895
Bacteria	Proteobacteria	Gammaproteobacteria	Diplorickettsiales	Diplorickettsiaceae		Ca	-0.199214	0.127014	0.606361
Bacteria	Proteobacteria	Gammaproteobacteria	Pseudomonadales	Pseudohongiellaceae	Pseudohongiella	Ca	0.0789338	0.548844	0.817402
Bacteria	Spirochaetota	Leptospirae	Leptospirales	Leptospiraceae	Leptospira	Ca	0.146591	0.263714	0.694058
Bacteria	Spirochaetota	Leptospirae	Turneriellales	Turneriellaceae	Turneriella	Ca	0.146591	0.263714	0.694058
Bacteria	Verrucomicrobiota	Verrucomicrobiae	Chthoniobacterales	UBA6821	UBA6821	Ca	0.0338288	0.797489	0.926417
Bacteria	Verrucomicrobiota	Verrucomicrobiae	Pedosphaerales	J093		Ca	0.154109	0.239735	0.694058
Bacteria	Verrucomicrobiota	Verrucomicrobiae	Verrucomicrobiales	DEV007	Arctic95D-9	Ca	0.154109	0.239735	0.694058
Bacteria	Verrucomicrobiota	Verrucomicrobiae	Verrucomicrobiales	Verrucomicrobiaceae	Verrucomicrobium	Ca	0.176661	0.176928	0.633503
Bacteria	Actinobacteriota	Acidimicrobiia	Acidimicrobiales	Microtrichaceae	IMCC26207	Ca	0.169144	0.196373	0.651772
Bacteria	Actinobacteriota	Acidimicrobiia				Ca	0.00375875	0.977261	0.986704
Bacteria	Actinobacteriota	Actinomycetia	Mycobacteriales	Mycobacteriaceae	Jongsikchunia	Ca	0.184179	0.158919	0.627752
Bacteria	Actinobacteriota	Actinomycetia	Sporichthyales	Sporichthyaceae	Longivirga	Ca	-0.124039	0.345046	0.715765
Bacteria	Actinobacteriota	Actinomycetia	Streptosporangiales	Streptosporangiaceae		Ca	0.176661	0.176928	0.633503
Bacteria	Actinobacteriota	Thermoleophilia	Miltoncostaeales	Miltoncostaeaceae		Ca	-0.0112763	0.931855	0.979643
Bacteria	Actinobacteriota	Thermoleophilia				Ca	0.0263113	0.84183	0.941057
Bacteria	Armatimonadota	Chthonomonadetes				Ca	0.169144	0.196373	0.651772
Bacteria	Bacteroidota	Bacteroidia	Bacteroidales			Ca	0.0939688	0.475134	0.809703
Bacteria	Bacteroidota	Bacteroidia	Cytophagales	172606-1	Rhodocytophaga	Ca	0.146591	0.263714	0.694058
Bacteria	Bacteroidota	Bacteroidia	Cytophagales	Hymenobacteraceae	Pontibacter	Ca	-0.0413463	0.753776	0.91053
Bacteria	Bacteroidota	Bacteroidia	Cytophagales	Spirosomaceae	Runella	Ca	-0.0563813	0.668738	0.87533
Bacteria	Bacteroidota	Bacteroidia	Cytophagales	Spirosomaceae		Ca	0.146591	0.263714	0.694058
Bacteria	Bacteroidota	Bacteroidia	Flavobacteriales	Flavobacteriaceae	Arenibacter	Ca	0.0789338	0.548844	0.817402
Bacteria	Bacteroidota	Ignavibacteria	Ignavibacteriales	Ignavibacteriaceae	IGN2	Ca	0.0638988	0.627646	0.859469
Bacteria	Bacteroidota	Ignavibacteria	Ignavibacteriales	Ignavibacteriaceae	UTCHB3	Ca	0.184179	0.158919	0.627752
Bacteria	Bacteroidota	Ignavibacteria	SJA-28	OLB5	OLB5	Ca	0.0638988	0.627646	0.859469
Bacteria	Bacteroidota	Kapabacteria	Kapabacteriales	UBA2268	PGYU01	Ca	0.124039	0.345046	0.715765
Bacteria	Bdellovibrionota	Bacteriovoracia	Bacteriovoracales	Bacteriovoracaceae	Bacteriovorax	Ca	0.176661	0.176928	0.633503
Bacteria	Bdellovibrionota	Bdellovibrionia	Bdellovibrionales	1-14-0-10-45-34	1-14-0-10-45-34	Ca	0.0638988	0.627646	0.859469
Bacteria	Bdellovibrionota	FAC87	UBA2466	UBA2466	RFNO01	Ca	0.0789338	0.548844	0.817402
Bacteria	Bdellovibrionota	UBA2361	SZUA-149	SZUA-149	SZUA-149	Ca	-0.146591	0.263714	0.694058
Bacteria	Chlamydiota	Chlamydiia	Chlamydiales	Rhabdochlamydiaceae	Rhabdochlamydia	Ca	0.0338288	0.797489	0.926417
Bacteria	Chlamydiota	Chlamydiia				Ca	0.0789338	0.548844	0.817402
Bacteria	Chloroflexota	Anaerolineae	Anaerolineales	UBA4823	DSWF01	Ca	0.0263113	0.84183	0.941057
Bacteria	Chloroflexota	Anaerolineae	Anaerolineales	UBA4823		Ca	0.169144	0.196373	0.651772
Bacteria	Chloroflexota	Chloroflexia	Thermomicrobiales	Thermomicrobiaceae		Ca	0.131556	0.316364	0.715765
Bacteria	Chloroflexota	Dehalococcoidia	SM23-28-2	RBG-16-64-32	CF-163	Ca	0.176661	0.176928	0.633503
Bacteria	Chloroflexota	Dehalococcoidia	UBA2963	UBA2963	Bin16	Ca	0.124039	0.345046	0.715765
Bacteria	Chloroflexota	Dehalococcoidia	UBA2979	UBA2979		Ca	-0.109004	0.407075	0.764773
Bacteria	Cyanobacteria	Vampirovibrionia	Obscuribacterales	Obscuribacteraceae	SBAT01	Ca	0.00375875	0.977261	0.986704
Bacteria	Dependentiae	Babeliae	Babeliales	UBA12411	UBA12411	Ca	-0.116521	0.375289	0.744697
Bacteria	Dependentiae	Babeliae	Babeliales	Vermiphilaceae	AWTP1-30	Ca	0.0638988	0.627646	0.859469
Bacteria	Desulfobacterota	Desulfobulbia	Desulfobulbales	Desulfobulbaceae		Ca	0.154109	0.239735	0.694058
Bacteria	Eremiobacterota	Eremiobacteria	Baltobacterales	Baltobacteraceae	Tyrphobacter	Ca	-0.0638988	0.627646	0.859469
Bacteria	FCPU426	Palsa-1180	Palsa-1180	Palsa-1180	Bog-1183	Ca	0.0638988	0.627646	0.859469
Bacteria	Firmicutes	Bacilli	Bacillales			Ca	-0.221766	0.0885801	0.561276
Bacteria	Firmicutes	Clostridia	Caldicoprobacterales	Xylanivirgaceae	Xylanivirga	Ca	0.176661	0.176928	0.633503
Bacteria	Fusobacteriota					Ca	-0.214249	0.100217	0.567895
Bacteria	Gemmatimonadota	Gemmatimonadetes	Gemmatimonadales	Gemmatimonadaceae	JAABRT01	Ca	0.00375875	0.977261	0.986704
Bacteria	Myxococcota	Polyangia	Nannocystales	Nannocystaceae		Ca	0.0187938	0.886665	0.962648
Bacteria	Myxococcota	UBA9160				Ca	0.124039	0.345046	0.715765
Bacteria	Patescibacteria	Paceibacteria	UBA9983	Zambryskibacteraceae		Ca	0.124039	0.345046	0.715765
Bacteria	Patescibacteria	Saccharimonadia	Saccharimonadales	UBA10212	21-14-0-10-47-8-A	Ca	0.184179	0.158919	0.627752
Bacteria	Patescibacteria	UBA1384	2-12-FULL-50-11	2-12-FULL-50-11	2-12-FULL-50-11	Ca	-0.184179	0.158919	0.627752
Bacteria	Planctomycetota	Phycisphaerae	UBA1845	UBA1845	SBAX01	Ca	0.169144	0.196373	0.651772
Bacteria	Planctomycetota	Planctomycetia	Pirellulales	Pirellulaceae	Mariniblastus	Ca	-0.0563813	0.668738	0.87533
Bacteria	Planctomycetota	Planctomycetia	Pirellulales	Thermoguttaceae	DSXL01	Ca	0.199214	0.127014	0.606361
Bacteria	Planctomycetota	Planctomycetia	Pirellulales	UBA1268	F1-20-MAGs016	Ca	-0.184179	0.158919	0.627752
Bacteria	Planctomycetota	Planctomycetia	Planctomycetales	Planctomycetaceae	DSVQ01	Ca	-0.0563813	0.668738	0.87533
Bacteria	Planctomycetota	UBA1135	UBA1135	GCA-002686595		Ca	0.0413463	0.753776	0.91053
Bacteria	Proteobacteria	Alphaproteobacteria	Geminicoccales	Geminicoccaceae	JAAAPF01	Ca	0.131556	0.316364	0.715765
Bacteria	Proteobacteria	Alphaproteobacteria	Micavibrionales	Micavibrionaceae	UBA1573	Ca	0.0112763	0.931855	0.979643
Bacteria	Proteobacteria	Alphaproteobacteria	Micavibrionales	Micavibrionaceae	UM-FILTER-47-13	Ca	0.0112763	0.931855	0.979643
Bacteria	Proteobacteria	Gammaproteobacteria	DSM-16500	DSM-16500	SCGC-AG-212-F23	Ca	0.124039	0.345046	0.715765
Bacteria	Proteobacteria	Gammaproteobacteria	Enterobacterales	Enterobacteriaceae	Acerihabitans	Ca	0.146591	0.263714	0.694058
Bacteria	Proteobacteria	Gammaproteobacteria	Legionellales	Legionellaceae	GCF-002776555	Ca	-0.0714163	0.58765	0.846683
Bacteria	Proteobacteria	Gammaproteobacteria	Pseudomonadales	Halieaceae	Halioglobus	Ca	0.0789338	0.548844	0.817402
Bacteria	Proteobacteria	Gammaproteobacteria	QQUJ01	QQUJ01	QQUJ01	Ca	0.124039	0.345046	0.715765
Bacteria	Proteobacteria	Gammaproteobacteria	UBA1113	UBA1113	GCA-2707205	Ca	-0.191696	0.142299	0.623788
Bacteria	UBA10199	UBA10199	UBA10199			Ca	-0.0488638	0.710819	0.89446
Bacteria	Verrucomicrobiota	Lentisphaeria				Ca	0.124039	0.345046	0.715765
Bacteria	Verrucomicrobiota	Verrucomicrobiae	Pedosphaerales	J093	MWFF01	Ca	0.124039	0.345046	0.715765
Bacteria	Actinobacteriota	Actinomycetia	Streptomycetales	Streptomycetaceae		Fe	0.188441	0.149038	0.52059
Bacteria	Actinobacteriota	Actinomycetia	Streptomycetales	Streptomycetaceae	Streptomyces	Fe	-0.0965851	0.462872	0.801207
Bacteria	Actinobacteriota	Actinomycetia	Propionibacteriales	Nocardioidaceae	Nocardioides	Fe	-0.234495	0.0713228	0.48213
Bacteria	Firmicutes	Bacilli	Bacillales	DSM-18226	Neobacillus	Fe	-0.270392	0.0366643	0.426734
Bacteria	Proteobacteria	Gammaproteobacteria	Xanthomonadales	Rhodanobacteraceae	Dyella	Fe	-0.257815	0.0467255	0.448323
Bacteria	Proteobacteria	Gammaproteobacteria	Nevskiales	Nevskiaceae	Solimonas	Fe	0.200156	0.12519	0.52059
Bacteria	Firmicutes	Bacilli	Bacillales	Sporolactobacillaceae	Pullulanibacillus	Fe	-0.287108	0.026135	0.380973
Bacteria	Planctomycetota	Planctomycetia	Isosphaerales	Isosphaeraceae	Singulisphaera	Fe	0.0394188	0.764917	0.93357
Bacteria	Proteobacteria	Gammaproteobacteria	Xanthomonadales	Rhodanobacteraceae		Fe	0.0831458	0.527654	0.838913
Bacteria	Bacteroidota	Bacteroidia	Chitinophagales	Chitinophagaceae	Chitinophaga	Fe	0.0138387	0.91642	0.993382
Bacteria	Planctomycetota	Planctomycetia	Isosphaerales	Isosphaeraceae	Aquisphaera	Fe	-0.0132837	0.919761	0.993912
Bacteria	Proteobacteria	Alphaproteobacteria	Rhizobiales	Devosiaceae	Devosia	Fe	0.30392	0.0182371	0.373861
Bacteria	Proteobacteria	Gammaproteobacteria	Burkholderiales	Burkholderiaceae	Ramlibacter	Fe	-0.212968	0.102313	0.516923
Bacteria	Proteobacteria	Gammaproteobacteria	Burkholderiales	Burkholderiaceae	Paraburkholderia	Fe	-0.0909307	0.489589	0.813577
Bacteria	Proteobacteria	Gammaproteobacteria	Xanthomonadales	Rhodanobacteraceae	Rhodanobacter	Fe	0.181717	0.164661	0.531337
Bacteria	Proteobacteria	Alphaproteobacteria	Sphingomonadales	Sphingomonadaceae	Sphingomonas	Fe	-0.160683	0.220031	0.609021
Bacteria	Proteobacteria	Gammaproteobacteria	Xanthomonadales	Rhodanobacteraceae	Frateuria	Fe	-0.0620058	0.637894	0.876785
Bacteria	Proteobacteria	Gammaproteobacteria	Burkholderiales	Burkholderiaceae	Massilia	Fe	-0.366628	0.00396156	0.195139
Bacteria	Proteobacteria	Alphaproteobacteria	Micropepsales	Micropepsaceae		Fe	0.173142	0.185849	0.560952
Bacteria	Firmicutes	Bacilli	Bacillales	Bacillaceae	Bacillus	Fe	-0.100604	0.444373	0.789077
Bacteria	Proteobacteria	Gammaproteobacteria	Pseudomonadales	Moraxellaceae	Cavicella	Fe	0.170644	0.192375	0.560952
Bacteria	Proteobacteria	Alphaproteobacteria	Rhizobiales	Xanthobacteraceae		Fe	0.0525182	0.690246	0.889746
Bacteria	Actinobacteriota	Actinomycetia	Actinomycetales	Dermatophilaceae		Fe	-0.0749453	0.569279	0.851988
Bacteria	Bacteroidota	Bacteroidia	Sphingobacteriales	Sphingobacteriaceae	Mucilaginibacter	Fe	0.158581	0.226201	0.613472
Bacteria	Proteobacteria	Gammaproteobacteria	Pseudomonadales	Pseudomonadaceae	Pseudomonas	Fe	0.0545364	0.678978	0.889563
Bacteria	Proteobacteria	Alphaproteobacteria	Rhizobiales	Rhizobiaceae	Rhizobium	Fe	0.0937174	0.476322	0.801824
Bacteria	Firmicutes	Bacilli				Fe	-0.151717	0.247196	0.634788
Bacteria	Actinobacteriota	Actinomycetia	Streptosporangiales	Streptosporangiaceae	Spirillospora	Fe	0.133989	0.307418	0.70023
Bacteria	Proteobacteria	Gammaproteobacteria	Burkholderiales	Burkholderiaceae		Fe	0.0885165	0.501237	0.818179
Bacteria	Proteobacteria	Gammaproteobacteria	Pseudomonadales	Moraxellaceae		Fe	0.0378409	0.774073	0.936682
Bacteria	Firmicutes	Bacilli	Alicyclobacillales	Alicyclobacillaceae	Alicyclobacillus	Fe	-0.356902	0.00512255	0.195139
Bacteria	Proteobacteria	Gammaproteobacteria	Nevskiales	Nevskiaceae	Stenotrophobium	Fe	0.053444	0.685068	0.889746
Bacteria	Planctomycetota	Planctomycetia	Gemmatales	Gemmataceae	Gemmata	Fe	0.19084	0.144123	0.52059
Bacteria	Proteobacteria	Gammaproteobacteria	Xanthomonadales	Xanthomonadaceae		Fe	-0.232043	0.0744198	0.493638
Bacteria	Actinobacteriota	Actinomycetia	Mycobacteriales	Mycobacteriaceae	Mycobacterium	Fe	-0.00186347	0.988726	0.999753
Bacteria	Planctomycetota	Planctomycetia	Pirellulales	Pirellulaceae		Fe	0.11404	0.385611	0.752859
Bacteria	Planctomycetota	Planctomycetia	Isosphaerales	Isosphaeraceae	Paludisphaera	Fe	-0.219108	0.0925675	0.516923
Bacteria	Proteobacteria	Gammaproteobacteria	Burkholderiales	Methylophilaceae	Methylovorus	Fe	0.355449	0.00531942	0.195139
Bacteria	Proteobacteria	Alphaproteobacteria	Rhizobiales	Rhizobiaceae	Mesorhizobium	Fe	0.0331176	0.801659	0.955139
Bacteria	Proteobacteria	Gammaproteobacteria	Burkholderiales	Burkholderiaceae	Noviherbaspirillum	Fe	0.153405	0.241914	0.629074
Bacteria	Planctomycetota	Planctomycetia	Gemmatales	Gemmataceae	Urbifossiella	Fe	0.108639	0.408658	0.770973
Bacteria						Fe	-0.0914221	0.487235	0.812448
Bacteria	Actinobacteriota	Actinomycetia				Fe	0.169635	0.195057	0.560952
Bacteria	Bacteroidota	Bacteroidia	Bacteroidales	Tenuifilaceae	SB25	Fe	0.304279	0.0180933	0.373861
Bacteria	Proteobacteria	Alphaproteobacteria	Rhizobiales	Xanthobacteraceae	Bradyrhizobium	Fe	0.0327678	0.803713	0.955952
Bacteria	Proteobacteria	Alphaproteobacteria	Sphingomonadales	Sphingomonadaceae	Novosphingobium	Fe	-0.150586	0.250778	0.634788
Bacteria	Bacteroidota	Bacteroidia	Cytophagales	Cyclobacteriaceae	ELB16-189	Fe	0.387807	0.00220207	0.191856
Bacteria	Firmicutes	Bacilli	Paenibacillales	Paenibacillaceae	Paenibacillus	Fe	-0.0814613	0.53608	0.838913
Bacteria	Bacteroidota	Bacteroidia	Chitinophagales	Chitinophagaceae	Niastella	Fe	0.286806	0.0262993	0.380973
Bacteria	Proteobacteria	Alphaproteobacteria	Rhizobiales	Xanthobacteraceae	Pseudolabrys	Fe	-0.0314843	0.811257	0.96001
Bacteria	Proteobacteria	Alphaproteobacteria	Caulobacterales	Caulobacteraceae	Phenylobacterium	Fe	-0.0309657	0.81431	0.961989
Bacteria	Bacteroidota	Bacteroidia	Chitinophagales	Chitinophagaceae	Arachidicoccus	Fe	-0.472802	0.000136384	0.0381896
Bacteria	Bdellovibrionota	Bacteriovoracia	Bacteriovoracales	Peredibacteraceae	Peredibacter	Fe	0.442835	0.000395403	0.0688989
Bacteria	Proteobacteria	Gammaproteobacteria	Burkholderiales	Burkholderiaceae	Bordetella	Fe	-0.255213	0.0490666	0.452559
Bacteria	Myxococcota	Polyangia	Polyangiales	Polyangiaceae		Fe	0.275962	0.0328216	0.401345
Bacteria	Planctomycetota	Planctomycetia	Pirellulales	Pirellulaceae	Pirellula	Fe	0.201769	0.122112	0.52059
Bacteria	Proteobacteria	Gammaproteobacteria	Burkholderiales	Burkholderiaceae	Pandoraea	Fe	-0.0585081	0.657007	0.884459
Bacteria	Proteobacteria	Alphaproteobacteria	Caulobacterales	Caulobacteraceae	Asticcacaulis	Fe	-0.114069	0.385491	0.752859
Bacteria	Planctomycetota	Planctomycetia	Isosphaerales	Isosphaeraceae		Fe	-0.122083	0.352763	0.736156
Bacteria	Acidobacteriota	Vicinamibacteria	Vicinamibacterales	SCN-69-37	SCN-69-37	Fe	0.279096	0.0308109	0.395364
Bacteria	Proteobacteria	Alphaproteobacteria	Reyranellales	Reyranellaceae	Reyranella	Fe	0.098323	0.454823	0.796511
Bacteria	Proteobacteria	Gammaproteobacteria	Burkholderiales	Rhodocyclaceae	Aromatoleum	Fe	0.0270561	0.837412	0.963474
Bacteria	Proteobacteria	Gammaproteobacteria	Xanthomonadales	Rhodanobacteraceae	Dokdonella	Fe	0.094756	0.471427	0.801824
Bacteria	Proteobacteria	Alphaproteobacteria	Rhizobiales	Labraceae		Fe	0.0934866	0.477413	0.801824
Bacteria	Acidobacteriota	Vicinamibacteria	Vicinamibacterales	UBA2999	WHSN01	Fe	0.159416	0.223735	0.613472
Bacteria	Proteobacteria	Gammaproteobacteria	Enterobacterales	Enterobacteriaceae		Fe	-0.227962	0.0798106	0.510349
Bacteria	Planctomycetota	Planctomycetia	Planctomycetales	Planctomycetaceae	Caulifigura	Fe	0.00751525	0.954554	0.996976
Bacteria	Actinobacteriota	Actinomycetia	Propionibacteriales	Nocardioidaceae	Aeromicrobium	Fe	0.0816776	0.534994	0.838913
Bacteria	Proteobacteria	Alphaproteobacteria	Rhizobiales	Devosiaceae		Fe	0.239147	0.0657303	0.473605
Bacteria	Cyanobacteria	Sericytochromatia	UBA7694	UBA7694	GCA-2770975	Fe	-0.124741	0.3423	0.728779
Bacteria	Proteobacteria	Gammaproteobacteria	Burkholderiales	Usitatibacteraceae		Fe	0.357889	0.00499237	0.195139
Bacteria	Proteobacteria	Alphaproteobacteria	Micropepsales	Micropepsaceae	Rhizomicrobium	Fe	0.185053	0.156916	0.52059
Bacteria	Bacteroidota	Bacteroidia	Cytophagales	Cyclobacteriaceae	Chryseolinea	Fe	0.315208	0.0141623	0.344206
Bacteria	Planctomycetota	Planctomycetia	Planctomycetales	Planctomycetaceae	Planctopirus	Fe	0.185137	0.156724	0.52059
Bacteria	Proteobacteria	Gammaproteobacteria	Burkholderiales	Methylophilaceae		Fe	0.467742	0.000164374	0.0381896
Bacteria	Myxococcota	Myxococcia	Myxococcales	Myxococcaceae		Fe	-0.0974418	0.458895	0.801207
Bacteria	Actinobacteriota	Actinomycetia	Streptomycetales	Catenulisporaceae	Actinospica	Fe	0.379788	0.00276288	0.195139
Bacteria	Planctomycetota	Phycisphaerae	Tepidisphaerales	Tepidisphaeraceae	UBA2421	Fe	0.0489572	0.71029	0.895323
Bacteria	Firmicutes	Bacilli	Paenibacillales	Paenibacillaceae	Cohnella	Fe	-0.276008	0.032791	0.401345
Bacteria	Proteobacteria	Gammaproteobacteria	Xanthomonadales	Rhodanobacteraceae	Luteibacter	Fe	-0.0942352	0.473878	0.801824
Bacteria	Planctomycetota	Planctomycetia	Planctomycetales	Planctomycetaceae	Planctomyces	Fe	-0.299922	0.0199017	0.375735
Bacteria	Verrucomicrobiota	Verrucomicrobiae	Verrucomicrobiales	Verrucomicrobiaceae	Prosthecobacter	Fe	0.201654	0.12233	0.52059
Bacteria	Verrucomicrobiota	Verrucomicrobiae	Pedosphaerales	Pedosphaeraceae	Pedosphaera	Fe	0.186237	0.154234	0.52059
Bacteria	Proteobacteria	Alphaproteobacteria	Dongiales	Dongiaceae	Dongia	Fe	0.374449	0.00320349	0.195139
Bacteria	Chloroflexota	Chloroflexia	Thermomicrobiales			Fe	0.0709879	0.589898	0.85837
Bacteria	Proteobacteria	Gammaproteobacteria	Burkholderiales	Nitrosomonadaceae	Nitrosomonas	Fe	0.0175296	0.894243	0.986174
Bacteria	Proteobacteria	Gammaproteobacteria	Burkholderiales	Burkholderiaceae	Castellaniella	Fe	0.395494	0.00176225	0.191856
Bacteria	Proteobacteria	Alphaproteobacteria	Sphingomonadales	Sphingomonadaceae		Fe	-0.14743	0.26096	0.644021
Bacteria	Proteobacteria	Alphaproteobacteria				Fe	0.221269	0.0893152	0.516923
Bacteria	Actinobacteriota	Actinomycetia	Actinomycetales	Microbacteriaceae		Fe	0.131516	0.316513	0.707077
Bacteria	Planctomycetota	Planctomycetia	Planctomycetales	UBA10511	UBA10511	Fe	-0.0943061	0.473544	0.801824
Bacteria	Proteobacteria	Alphaproteobacteria	Rhodobacterales	Rhodobacteraceae	Paracoccus	Fe	-0.0593715	0.652268	0.884459
Bacteria	Firmicutes	Bacilli	Bacillales	Bacillaceae	Priestia	Fe	-0.0656272	0.61835	0.873934
Bacteria	Gemmatimonadota	Gemmatimonadetes	Gemmatimonadales	Gemmatimonadaceae	Gemmatimonas	Fe	0.00216443	0.986905	0.999753
Bacteria	Gemmatimonadota	Gemmatimonadetes	Gemmatimonadales	Gemmatimonadaceae	Roseisolibacter	Fe	-0.0016712	0.989889	0.999753
Bacteria	Proteobacteria	Gammaproteobacteria	Burkholderiales	Burkholderiaceae	Caballeronia	Fe	-0.0478647	0.71648	0.898419
Bacteria	Myxococcota	Polyangia	Polyangiales			Fe	0.194682	0.136073	0.52059
Bacteria	Proteobacteria	Gammaproteobacteria	Nevskiales	Nevskiaceae	Nevskia	Fe	-0.0538409	0.682853	0.889746
Bacteria	Proteobacteria	Gammaproteobacteria	Pseudomonadales	Moraxellaceae	Acinetobacter	Fe	-0.369935	0.00362356	0.195139
Bacteria	Verrucomicrobiota	Verrucomicrobiae	Opitutales	Opitutaceae	ER46	Fe	0.533017	1.16286e-05	0.00810512
Bacteria	Bacteroidota	Bacteroidia	Bacteroidales	Marinilabiliaceae	JC017	Fe	-0.285929	0.0267829	0.380973
Bacteria	Bacteroidota	Bacteroidia	Chitinophagales	Chitinophagaceae	Ginsengibacter	Fe	-0.0010553	0.993615	0.999753
Bacteria	Proteobacteria	Gammaproteobacteria	Burkholderiales	Burkholderiaceae	Pusillimonas	Fe	0.0630652	0.632151	0.874246
Bacteria	Bacteroidota	Bacteroidia	Chitinophagales	Chitinophagaceae		Fe	0.181934	0.16415	0.531337
Bacteria	Proteobacteria	Gammaproteobacteria	Xanthomonadales	Xanthomonadaceae	Luteimonas	Fe	-0.113712	0.38699	0.753441
Bacteria	Acidobacteriota	Acidobacteriae	Acidobacteriales	Acidobacteriaceae	Edaphobacter	Fe	-0.217025	0.0957887	0.516923
Bacteria	Bacteroidota	Bacteroidia	Chitinophagales	Chitinophagaceae	Haoranjiania	Fe	0.0660594	0.616034	0.873934
Bacteria	Proteobacteria	Gammaproteobacteria	Nevskiales	Nevskiaceae		Fe	0.296133	0.0215975	0.375735
Bacteria	Proteobacteria	Gammaproteobacteria	Pseudomonadales	Pseudomonadaceae		Fe	0.0529361	0.687907	0.889746
Bacteria	Bacteroidota	Bacteroidia	Cytophagales	Spirosomaceae	Dyadobacter	Fe	0.00735947	0.955495	0.996976
Bacteria	Proteobacteria	Gammaproteobacteria	Burkholderiales	Rhodocyclaceae	Thauera	Fe	-0.00949714	0.942587	0.996976
Bacteria	Proteobacteria	Alphaproteobacteria	Rhizobiales	Xanthobacteraceae	Afipia	Fe	-0.195438	0.134528	0.52059
Bacteria	Proteobacteria	Alphaproteobacteria	Parvibaculales	Parvibaculaceae	Parvibaculum	Fe	0.125941	0.337642	0.726081
Bacteria	Proteobacteria	Alphaproteobacteria	Rhizobiales	Stappiaceae		Fe	-0.0478306	0.716673	0.898419
Bacteria	Firmicutes	Bacilli	Paenibacillales	NBRC-103111	VKM-B-2647	Fe	0.0527671	0.688852	0.889746
Bacteria	Acidobacteriota	Vicinamibacteria	Vicinamibacterales	UBA2999		Fe	0.296523	0.0214171	0.375735
Bacteria	Actinobacteriota	Actinomycetia	Mycobacteriales	Micromonosporaceae	Actinocatenispora	Fe	0.268797	0.0378306	0.430996
Bacteria	Bacteroidota	Bacteroidia	Cytophagales	Cyclobacteriaceae	Ohtaekwangia	Fe	0.125882	0.337869	0.726081
Bacteria	Bacteroidota	Bacteroidia	Chitinophagales	Chitinophagaceae	Edaphocola	Fe	-0.0487197	0.711634	0.895323
Bacteria	Gemmatimonadota	Gemmatimonadetes	Gemmatimonadales	Gemmatimonadaceae		Fe	0.135623	0.301502	0.693924
Bacteria	Proteobacteria	Alphaproteobacteria	Rhizobiales	Rhizobiaceae	Shinella	Fe	-0.115442	0.379761	0.745614
Bacteria	Verrucomicrobiota	Verrucomicrobiae	Opitutales	Opitutaceae	Lacunisphaera	Fe	0.190772	0.14427	0.52059
Bacteria	Chloroflexota	Limnocylindria	Limnocylindrales	CSP1-4	GWC2-73-18	Fe	0.209146	0.108769	0.516923
Bacteria	Proteobacteria	Gammaproteobacteria	Berkiellales	Berkiellaceae	Berkiella	Fe	0.0423975	0.747721	0.921339
Bacteria	Actinobacteriota	Thermoleophilia	Solirubrobacterales	Solirubrobacteraceae	Baekduia	Fe	-0.0159846	0.903517	0.988621
Bacteria	Myxococcota	Polyangia	Polyangiales	SLQV01	SLQV01	Fe	0.393584	0.00186349	0.191856
Bacteria	Proteobacteria	Gammaproteobacteria	Burkholderiales	SG8-41	UBA5216	Fe	0.158817	0.225503	0.613472
Bacteria	Dependentiae	Babeliae	Babeliales	Vermiphilaceae	Vermiphilus	Fe	0.305974	0.0174289	0.373861
Bacteria	Proteobacteria	Alphaproteobacteria	Sphingomonadales	Sphingomonadaceae	Sphingopyxis	Fe	-0.184105	0.15909	0.52059
Bacteria	Bacteroidota	Bacteroidia	Chitinophagales	Chitinophagaceae	Flavipsychrobacter	Fe	-0.0453778	0.730637	0.909382
Bacteria	Actinobacteriota	Thermoleophilia	Solirubrobacterales	70-9	VAYN01	Fe	0.160327	0.221065	0.609021
Bacteria	Bdellovibrionota	Bdellovibrionia	UBA1018	UBA1018	GWA1-52-35	Fe	0.0660123	0.616287	0.873934
Bacteria	Myxococcota	Myxococcia	Myxococcales	Myxococcaceae	WRKR01	Fe	0.211643	0.104516	0.516923
Bacteria	Proteobacteria	Gammaproteobacteria	Legionellales	Legionellaceae	Legionella	Fe	0.00107943	0.993469	0.999753
Bacteria	Actinobacteriota					Fe	-0.0540025	0.681952	0.889746
Bacteria	Actinobacteriota	Actinomycetia	Actinomycetales	Microbacteriaceae	Leifsonia	Fe	-0.136322	0.298994	0.692356
Bacteria	Bacteroidota	Bacteroidia	Chitinophagales	Chitinophagaceae	Sediminibacterium	Fe	0.356523	0.00517327	0.195139
Bacteria	Myxococcota	UBA796	UBA796	GCA-2862545	REDI01	Fe	0.107355	0.414249	0.776058
Bacteria	Verrucomicrobiota	Verrucomicrobiae	Pedosphaerales	CAIYYI01	DSWX01	Fe	0.171219	0.190858	0.560952
Bacteria	Proteobacteria	Gammaproteobacteria	Burkholderiales	Burkholderiaceae	Trinickia	Fe	0.171972	0.188886	0.560952
Bacteria	Firmicutes	Bacilli	Bacillales	DSM-1321	Peribacillus	Fe	0.0759261	0.564222	0.851988
Bacteria	Proteobacteria	Gammaproteobacteria	Burkholderiales	Burkholderiaceae	Candidimonas	Fe	-0.0613335	0.64155	0.876785
Bacteria	Proteobacteria	Alphaproteobacteria	Acetobacterales	Acetobacteraceae	Rhodopila	Fe	-0.0642319	0.62585	0.873934
Bacteria	Bacteroidota	Bacteroidia	Sphingobacteriales	Sphingobacteriaceae	Pararcticibacter	Fe	0.210722	0.10607	0.516923
Bacteria	Proteobacteria	Gammaproteobacteria	Burkholderiales	Burkholderiaceae	Burkholderia	Fe	-0.300313	0.0197336	0.375735
Bacteria	Actinobacteriota	Actinomycetia	Actinomycetales	Micrococcaceae		Fe	0.304762	0.0179019	0.373861
Bacteria	Bacteroidota	Bacteroidia	Chitinophagales	Chitinophagaceae	Agriterribacter	Fe	0.161707	0.217064	0.605825
Bacteria	Proteobacteria	Alphaproteobacteria	Caulobacterales	Hyphomonadaceae	Asprobacter	Fe	0.24787	0.0561953	0.464347
Bacteria	Bacteroidota	Bacteroidia	AKYH767-A	OLB10	OLB10	Fe	-0.0630623	0.632167	0.874246
Bacteria	Chloroflexota	Anaerolineae	Caldilineales	Caldilineaceae		Fe	0.236053	0.0694091	0.479599
Bacteria	Acidobacteriota	Acidobacteriae	Bryobacterales	Bryobacteraceae	KBS-96	Fe	0.0828623	0.529067	0.838913
Bacteria	Verrucomicrobiota	Verrucomicrobiae	Chthoniobacterales	Terrimicrobiaceae	Terrimicrobium	Fe	-0.0729863	0.579444	0.85837
Bacteria	Bacteroidota	Bacteroidia	AKYH767	B-17BO	UBA4416	Fe	0.292941	0.0231189	0.376345
Bacteria	Myxococcota	Polyangia	Haliangiales	Haliangiaceae	Haliangium	Fe	0.128435	0.328084	0.714607
Bacteria	Firmicutes	Bacilli	Paenibacillales	NBRC-103111	Paenibacillus	Fe	-0.00806925	0.951208	0.996976
Bacteria	Bacteroidota	Bacteroidia	Chitinophagales	Chitinophagaceae	Parafilimonas	Fe	0.0526245	0.68965	0.889746
Bacteria	Proteobacteria	Alphaproteobacteria	Sphingomonadales	Sphingomonadaceae	Allosphingosinicella	Fe	0.264822	0.0408732	0.445135
Bacteria	Bacteroidota	Bacteroidia	Sphingobacteriales	Sphingobacteriaceae	Pedobacter	Fe	0.261453	0.0436069	0.448323
Bacteria	Planctomycetota	Planctomycetia	Pirellulales	Pirellulaceae	Anammoximicrobium	Fe	0.145706	0.266642	0.647558
Bacteria	Omnitrophota	Omnitrophia	Omnitrophales	UBA2337		Fe	0.174676	0.181922	0.560952
Bacteria	Bacteroidota	Bacteroidia	Sphingobacteriales	Sphingobacteriaceae		Fe	0.241327	0.063234	0.464498
Bacteria	Cyanobacteria	Vampirovibrionia				Fe	0.238992	0.0659106	0.473605
Bacteria	Proteobacteria	Alphaproteobacteria	Rhizobiales	Rhizobiaceae		Fe	-0.108498	0.409268	0.770973
Bacteria	Gemmatimonadota	Gemmatimonadetes	Longimicrobiales	Longimicrobiaceae	Longimicrobium	Fe	-0.134876	0.304199	0.695421
Bacteria	Proteobacteria	Alphaproteobacteria	Rhizobiales	Kaistiaceae	Bauldia	Fe	0.0969869	0.461004	0.801207
Bacteria	Verrucomicrobiota	Verrucomicrobiae	Pedosphaerales	UBA11358	UBA11358	Fe	0.0415723	0.752473	0.924968
Bacteria	Proteobacteria	Alphaproteobacteria	Caulobacterales	Caulobacteraceae	PMMR1	Fe	0.185407	0.15611	0.52059
Bacteria	Planctomycetota	Planctomycetia	Isosphaerales	Isosphaeraceae	Tundrisphaera	Fe	-0.0587508	0.655674	0.884459
Bacteria	Proteobacteria	Alphaproteobacteria	Rhizobiales	Xanthobacteraceae	Rhodopseudomonas	Fe	0.0194172	0.882931	0.983973
Bacteria	Bacteroidota	Bacteroidia	Chitinophagales	Saprospiraceae	OLB8	Fe	-0.0220149	0.867402	0.98146
Bacteria	Proteobacteria	Alphaproteobacteria	Rhizobiales	Rhizobiaceae	Sinorhizobium	Fe	-0.127652	0.331063	0.718842
Bacteria	Myxococcota	Polyangia	Polyangiales	Polyangiaceae	Aetherobacter	Fe	0.357947	0.00498479	0.195139
Bacteria	Acidobacteriota	Blastocatellia	Pyrinomonadales	Pyrinomonadaceae	OLB17	Fe	0.0397059	0.763255	0.933313
Bacteria	Myxococcota	Polyangia	Haliangiales	Haliangiaceae		Fe	0.270295	0.0367347	0.426734
Bacteria	Actinobacteriota	Thermoleophilia	Solirubrobacterales			Fe	-0.00142951	0.991351	0.999753
Bacteria	Proteobacteria	Gammaproteobacteria				Fe	0.228204	0.079483	0.510349
Bacteria	Proteobacteria	Alphaproteobacteria	Rhizobiales	Hyphomicrobiaceae	Hyphomicrobium	Fe	-0.0947953	0.471242	0.801824
Bacteria	Armatimonadota	Fimbriimonadia	Fimbriimonadales	Fimbriimonadaceae	Fimbriimonas	Fe	0.196471	0.13244	0.52059
Bacteria	Firmicutes	Bacilli	Bacillales	Bacillaceae		Fe	-0.334142	0.00907361	0.258017
Bacteria	Proteobacteria	Gammaproteobacteria	Steroidobacterales	Steroidobacteraceae		Fe	0.0104526	0.936822	0.996894
Bacteria	Proteobacteria	Gammaproteobacteria	Burkholderiales	Burkholderiaceae	Ralstonia	Fe	-0.295054	0.022102	0.375735
Bacteria	Chloroflexota	Limnocylindria				Fe	-0.0107958	0.934752	0.996211
Bacteria	Proteobacteria	Alphaproteobacteria	Micavibrionales	Micavibrionaceae	UBA6145	Fe	0.29274	0.0232179	0.376345
Bacteria	Proteobacteria	Alphaproteobacteria	Rhizobiales	Rhizobiaceae	Ensifer	Fe	-0.183272	0.161017	0.524435
Bacteria	Acidobacteriota	Thermoanaerobaculia	UBA5704	UBA5704		Fe	-0.135579	0.301663	0.693924
Bacteria	Proteobacteria	Alphaproteobacteria	Rhizobiales	Beijerinckiaceae		Fe	-0.213849	0.100867	0.516923
Bacteria	Gemmatimonadota	Gemmatimonadetes	Gemmatimonadales	GWC2-71-9	Palsa-1233	Fe	0.234	0.071939	0.48213
Bacteria	Myxococcota	Myxococcia	Myxococcales	Vulgatibacteraceae	Vulgatibacter	Fe	0.0793921	0.546519	0.838913
Bacteria	Proteobacteria	Gammaproteobacteria	DSM-16500	DSM-16500	Aquicella	Fe	0.253516	0.050645	0.452559
Bacteria	Actinobacteriota	Acidimicrobiia	Acidimicrobiales	JACDCH01	VFJN01	Fe	0.129005	0.325922	0.712125
Bacteria	Planctomycetota	Planctomycetia	Gemmatales	Gemmataceae		Fe	-0.120404	0.359476	0.736926
Bacteria	Actinobacteriota	Actinomycetia	Mycobacteriales	Geodermatophilaceae	Geodermatophilus	Fe	-0.0623397	0.636082	0.876184
Bacteria	Proteobacteria	Gammaproteobacteria	Legionellales	Legionellaceae		Fe	0.0284952	0.828891	0.963474
Bacteria	Proteobacteria	Gammaproteobacteria	Steroidobacterales	Steroidobacteraceae	SCUD01	Fe	0.154483	0.238583	0.629074
Bacteria	Planctomycetota	Planctomycetia	Pirellulales			Fe	0.241719	0.0627931	0.464498
Bacteria	Proteobacteria	Alphaproteobacteria	Rhodobacterales	Rhodobacteraceae		Fe	-0.235467	0.0701232	0.479599
Bacteria	Bacteroidota	Bacteroidia	Flavobacteriales	Crocinitomicaceae	Fluviicola	Fe	0.136363	0.298847	0.692356
Bacteria	Proteobacteria	Alphaproteobacteria	Rhizobiales	Beijerinckiaceae	Microvirga	Fe	-0.100485	0.444917	0.789077
Bacteria	Planctomycetota	Planctomycetia	Planctomycetales	Planctomycetaceae	Schlesneria	Fe	0.153125	0.242785	0.629074
Bacteria	Chlamydiota	Chlamydiia	Chlamydiales	Parachlamydiaceae	HS-T3	Fe	0.0343048	0.794701	0.951798
Bacteria	Proteobacteria	Alphaproteobacteria	Rhodospirillales			Fe	0.0172997	0.895622	0.986174
Bacteria	Proteobacteria	Gammaproteobacteria	Pseudomonadales			Fe	0.156953	0.231065	0.621823
Bacteria	Chloroflexota	Chloroflexia	Chloroflexales	Roseiflexaceae	Kouleothrix	Fe	0.0523473	0.691203	0.889746
Bacteria	Sumerlaeota	Sumerlaeia	Sumerlaeales	Sumerlaeaceae	HGW-BRC1-1	Fe	0.257395	0.0470973	0.448323
Bacteria	Proteobacteria	Gammaproteobacteria	Pseudomonadales	Alcanivoracaceae	Alcanivorax	Fe	-0.0381972	0.772003	0.936467
Bacteria	Proteobacteria	Alphaproteobacteria	Micavibrionales	UBA2020	UBA2020	Fe	0.349413	0.00621083	0.19677
Bacteria	Verrucomicrobiota	Verrucomicrobiae	Verrucomicrobiales	Verrucomicrobiaceae	VFKE01	Fe	-0.00153863	0.990691	0.999753
Bacteria	Bdellovibrionota	Bdellovibrionia	Bdellovibrionales	Bdellovibrionaceae	Bdellovibrio	Fe	0.0729438	0.579666	0.85837
Bacteria	Bacteroidota	Bacteroidia	Sphingobacteriales	Sphingobacteriaceae	Pelobium	Fe	-0.260325	0.0445552	0.448323
Bacteria	Myxococcota	Polyangia	Polyangiales	Polyangiaceae	Palsa-1150	Fe	0.00841821	0.9491	0.996976
Bacteria	Actinobacteriota	Actinomycetia	Propionibacteriales	Nocardioidaceae	Marmoricola	Fe	-0.212249	0.103505	0.516923
Bacteria	Planctomycetota	Planctomycetia	Gemmatales	Gemmataceae	Zavarzinella	Fe	0.11292	0.390324	0.756313
Bacteria	Acidobacteriota	Vicinamibacteria	Vicinamibacterales			Fe	-0.109069	0.406792	0.770973
Bacteria	Actinobacteriota	Actinomycetia	Mycobacteriales	Jatrophihabitantaceae	Jatrophihabitans	Fe	-0.256833	0.0475982	0.448323
Bacteria	Proteobacteria	Alphaproteobacteria	Sphingomonadales	Sphingomonadaceae	Sphingomicrobium	Fe	-0.0904534	0.49188	0.813577
Bacteria	Chloroflexota	Dehalococcoidia	DSTF01	WHTK01	WHTK01	Fe	0.127384	0.332091	0.718842
Bacteria	Acidobacteriota	Acidobacteriae	Bryobacterales	Bryobacteraceae		Fe	0.0648886	0.622316	0.873934
Bacteria	Bacteroidota	SZUA-365	SZUA-365	SZUA-365	BM516	Fe	0.243071	0.0612911	0.464347
Bacteria	Proteobacteria	Alphaproteobacteria	Rhizobiales	Beijerinckiaceae	Bosea	Fe	-0.190326	0.145227	0.52059
Bacteria	Proteobacteria	Gammaproteobacteria	DSM-16500	DSM-16500	UBA4722	Fe	-0.0409847	0.755863	0.925899
Bacteria	Proteobacteria	Gammaproteobacteria	Burkholderiales	SG8-39	SCGC-AG-212-J23	Fe	0.116471	0.375499	0.741424
Bacteria	Bacteroidota	Bacteroidia	Chitinophagales	Chitinophagaceae	Edaphobaculum	Fe	-0.259557	0.04521	0.448323
Bacteria	Chloroflexota	Anaerolineae				Fe	-0.151119	0.249086	0.634788
Bacteria	Planctomycetota	Phycisphaerae	WQYP01	WQYP01	WQYP01	Fe	-0.0459479	0.727384	0.906952
Bacteria	Actinobacteriota	Acidimicrobiia	Acidimicrobiales	RAAP-2	Bog-756	Fe	-0.0555637	0.673268	0.887085
Bacteria	Bacteroidota	Bacteroidia	Cytophagales	Cyclobacteriaceae	Chryseotalea	Fe	0.191472	0.142775	0.52059
Bacteria	Planctomycetota	Planctomycetia	Pirellulales	UBA7805	MB-PLM-2	Fe	0.15112	0.249083	0.634788
Bacteria	Proteobacteria	Alphaproteobacteria	Sphingomonadales	Sphingomonadaceae	Sphingobium	Fe	-0.333326	0.00925456	0.258017
Bacteria	Proteobacteria	Alphaproteobacteria	Rhizobiales	UBA4765	UBA4765	Fe	-0.0905122	0.491598	0.813577
Bacteria	Proteobacteria	Alphaproteobacteria	Acetobacterales	Acetobacteraceae		Fe	0.0010411	0.993701	0.999753
Bacteria	Proteobacteria	Alphaproteobacteria	Rhizobiales	Rhizobiaceae	Allorhizobium	Fe	0.120912	0.357435	0.736926
Bacteria	Proteobacteria	Alphaproteobacteria	Rhodospirillales	GLO-3	GLO-3	Fe	0.176263	0.177922	0.556106
Bacteria	Proteobacteria	Gammaproteobacteria	Xanthomonadales	Xanthomonadaceae	Pseudoxanthomonas	Fe	0.0165236	0.90028	0.988182
Bacteria	Bacteroidota	Bacteroidia	Chitinophagales	Chitinophagaceae	Niabella	Fe	-0.2504	0.0536499	0.458445
Bacteria	Proteobacteria	Alphaproteobacteria	Rhizobiales	Xanthobacteraceae	Aquabacter	Fe	-0.0526253	0.689646	0.889746
Bacteria	Verrucomicrobiota	Verrucomicrobiae	Pedosphaerales	UBA11358	WYBW01	Fe	0.0558208	0.671842	0.886883
Bacteria	Planctomycetota	Planctomycetia	Planctomycetales	Planctomycetaceae	Planctomicrobium	Fe	0.260481	0.0444226	0.448323
Bacteria	Proteobacteria	Alphaproteobacteria	Caulobacterales	Caulobacteraceae		Fe	-0.141006	0.282541	0.674421
Bacteria	Actinobacteriota	Actinomycetia	Actinomycetales	Micrococcaceae	Paenarthrobacter	Fe	-0.178992	0.171193	0.549869
Bacteria	Firmicutes	Bacilli	Paenibacillales	NBRC-103111		Fe	-0.0515434	0.695712	0.889746
Bacteria	Actinobacteriota	Actinomycetia	Actinomycetales	Cellulomonadaceae	Cellulomonas	Fe	0.0236304	0.857769	0.974476
Bacteria	Proteobacteria	Alphaproteobacteria	Sphingomonadales	Sphingomonadaceae	Rhizorhabdus	Fe	-0.207222	0.112136	0.516923
Bacteria	Planctomycetota	UBA1135	UBA2386	UBA2386	UBA2386	Fe	-0.189598	0.146802	0.52059
Bacteria	Myxococcota	Polyangia	Polyangiales	Polyangiaceae	Chondromyces	Fe	0.254454	0.0497676	0.452559
Bacteria	Proteobacteria	Alphaproteobacteria	Rhizobiales	Kaistiaceae	Kaistia	Fe	-0.231536	0.0750727	0.493638
Bacteria	Fibrobacterota	Fibrobacteria	Fibrobacterales	Fibrobacteraceae		Fe	0.243181	0.0611709	0.464347
Bacteria	Bacteroidota	Bacteroidia	AKYH767	B-17BO	UBA2475	Fe	-0.0503196	0.702597	0.893775
Bacteria	Actinobacteriota	Actinomycetia	Actinomycetales	Microbacteriaceae	Gryllotalpicola	Fe	-0.203775	0.118367	0.517387
Bacteria	Bacteroidota	Bacteroidia	AKYH767	2-12-FULL-35-15	2-12-FULL-35-15	Fe	0.388146	0.00218078	0.191856
Bacteria	Proteobacteria	Alphaproteobacteria	Azospirillales	Azospirillaceae	Azospirillum	Fe	-0.369302	0.00368621	0.195139
Bacteria	Planctomycetota	Planctomycetia	Pirellulales	Lacipirellulaceae		Fe	-0.0356781	0.786672	0.948634
Bacteria	Bacteroidota	Bacteroidia	Cytophagales	Cytophagaceae	Cytophaga	Fe	0.121125	0.356584	0.736926
Bacteria	Chloroflexota	Anaerolineae	Aggregatilineales	A4b		Fe	0.17211	0.188526	0.560952
Bacteria	Planctomycetota	Planctomycetia	Planctomycetales	Planctomycetaceae	Alienimonas	Fe	0.00709565	0.957089	0.997146
Bacteria	Bacteroidota	Bacteroidia	Cytophagales	Cyclobacteriaceae		Fe	-0.0292795	0.824256	0.963474
Bacteria	Bacteroidota	Bacteroidia	Cytophagales	Cytophagaceae	Sporocytophaga	Fe	0.243606	0.0607058	0.464347
Bacteria	Proteobacteria	Alphaproteobacteria	Caedimonadales	Nucleicultricaceae	Nucleicultrix	Fe	-0.036412	0.782391	0.945106
Bacteria	Patescibacteria	Saccharimonadia	UBA4664	UBA4664	UBA4664	Fe	0.2113	0.105093	0.516923
Bacteria	Proteobacteria	Gammaproteobacteria	Pseudomonadales	Pseudohongiellaceae		Fe	0.253759	0.0504168	0.452559
Bacteria	Actinobacteriota	Actinomycetia	Mycobacteriales	Mycobacteriaceae	Nocardia	Fe	0.120788	0.357935	0.736926
Bacteria	Planctomycetota	Planctomycetia	Planctomycetales	Planctomycetaceae		Fe	0.112334	0.392805	0.756313
Bacteria	Proteobacteria	Alphaproteobacteria	Rhodospirillales	Rhodospirillaceae	SCTM01	Fe	0.089316	0.497364	0.818179
Bacteria	Proteobacteria	Alphaproteobacteria	Rhizobiales	Rhizobiaceae	Ochrobactrum	Fe	-0.0923878	0.482628	0.808633
Bacteria	Proteobacteria	Gammaproteobacteria	Burkholderiales	Methylophilaceae	Pseudomethylobacillus	Fe	-0.245001	0.0591985	0.464347
Bacteria	Actinobacteriota	Actinomycetia	Mycobacteriales	Pseudonocardiaceae	Pseudonocardia	Fe	0.192322	0.140977	0.52059
Bacteria	Bacteroidota	Kapabacteria	Kapabacteriales	Kapabacteriaceae	Kapabacteria	Fe	0.206471	0.113471	0.516923
Bacteria	Proteobacteria	Alphaproteobacteria	Rhizobiales	Aestuariivirgaceae	Aestuariivirga	Fe	0.147874	0.259511	0.644021
Bacteria	Proteobacteria	Gammaproteobacteria	Burkholderiales	Burkholderiaceae	Achromobacter	Fe	-0.250005	0.0540411	0.458445
Bacteria	Acidobacteriota	Acidobacteriae	Acidobacteriales	Acidobacteriaceae	Terriglobus	Fe	0.051621	0.695277	0.889746
Bacteria	Chloroflexota	Dehalococcoidia	UBA2979	UBA2979	RBC038	Fe	-0.0167393	0.898985	0.988182
Bacteria	Bdellovibrionota	Bdellovibrionia	Bdellovibrionales	SG-bin7	SG-bin7	Fe	0.186216	0.15428	0.52059
Bacteria	Proteobacteria	Gammaproteobacteria	GCA-2729495	GCA-2729495	QUBU01	Fe	0.203869	0.118193	0.517387
Bacteria	Proteobacteria	Alphaproteobacteria	Rhizobiales	Xanthobacteraceae	Z2-YC6860	Fe	0.0803348	0.54175	0.838913
Bacteria	Actinobacteriota	Actinomycetia	Mycobacteriales	Antricoccaceae		Fe	-0.209048	0.108938	0.516923
Bacteria	Proteobacteria	Alphaproteobacteria	Sphingomonadales	Sphingomonadaceae	Sphingosinicella	Fe	-0.0859721	0.513666	0.823047
Bacteria	Firmicutes	Moorellia	Thermacetogeniales	Thermacetogeniaceae	Palsa-1188	Fe	-0.376664	0.00301364	0.195139
Bacteria	Actinobacteriota	Thermoleophilia	Gaiellales	Gaiellaceae	Palsa-739	Fe	-0.00346772	0.979021	0.999538
Bacteria	Proteobacteria	Gammaproteobacteria	Xanthomonadales	Xanthomonadaceae	Stenotrophomonas	Fe	0.196316	0.132752	0.52059
Bacteria	Bdellovibrionota	Oligoflexia	Oligoflexales	Bin106	Bin106	Fe	0.150423	0.251298	0.634788
Bacteria	Proteobacteria	Gammaproteobacteria	Immundisolibacterales	Immundisolibacteraceae	Immundisolibacter	Fe	0.105968	0.420342	0.783364
Bacteria	Verrucomicrobiota	Verrucomicrobiae	Verrucomicrobiales	Verrucomicrobiaceae		Fe	0.0754289	0.566783	0.851988
Bacteria	Bacteroidota	Bacteroidia	Chitinophagales	Chitinophagaceae	FW021-bin31	Fe	-0.153381	0.241988	0.629074
Bacteria	Armatimonadota	Abditibacteria	Abditibacteriales	Abditibacteriaceae	Abditibacterium	Fe	0.000209857	0.99873	1
Bacteria	Planctomycetota	Planctomycetia	Pirellulales	Lacipirellulaceae	Pirellulimonas	Fe	-0.122941	0.349366	0.731255
Bacteria	Proteobacteria	Alphaproteobacteria	Caulobacterales	Caulobacteraceae	Caulobacter	Fe	-0.0792978	0.546997	0.838913
Bacteria	Chloroflexota	Anaerolineae	Aggregatilineales	A4b	OLB15	Fe	-0.0732931	0.577847	0.85837
Bacteria	Proteobacteria	Alphaproteobacteria	Micavibrionales	Micavibrionaceae	UBA7657	Fe	-0.0602124	0.647666	0.881276
Bacteria	Bacteroidota	Bacteroidia	Chitinophagales	Saprospiraceae	OLB9	Fe	0.0885836	0.500911	0.818179
Bacteria	Actinobacteriota	Actinomycetia	Mycobacteriales	Pseudonocardiaceae	Amycolatopsis	Fe	-0.0729807	0.579473	0.85837
Bacteria	Planctomycetota	Planctomycetia	Pirellulales	Pirellulaceae	Anatilimnocola	Fe	0.0903075	0.492582	0.813577
Bacteria	Bacteroidota	Bacteroidia	Chitinophagales	Chitinophagaceae	Flavitalea	Fe	-0.129291	0.324842	0.712125
Bacteria	Planctomycetota	Phycisphaerae	Phycisphaerales	UBA1924		Fe	0.352736	0.00570513	0.19677
Bacteria	Proteobacteria	Alphaproteobacteria	Caulobacterales	Caulobacteraceae	Brevundimonas	Fe	-0.129066	0.325692	0.712125
Bacteria	Bacteroidota	Bacteroidia	Chitinophagales	Chitinophagaceae	Flavisolibacter	Fe	-0.327554	0.0106262	0.284864
Bacteria	Proteobacteria	Gammaproteobacteria	Xanthomonadales	Xanthomonadaceae	Arenimonas	Fe	-0.0890323	0.498736	0.818179
Bacteria	Bacteroidota	Kapabacteria	Kapabacteriales			Fe	-0.074879	0.569622	0.851988
Bacteria	Hydrogenedentota	Hydrogenedentia	Hydrogenedentiales	CAITNO01	SLFT01	Fe	-0.0515434	0.695712	0.889746
Bacteria	Proteobacteria	Alphaproteobacteria	Rhizobiales	Xanthobacteraceae	Rhodoplanes	Fe	0.0995298	0.449279	0.790776
Bacteria	Myxococcota	Polyangia	Nannocystales	Nannocystaceae	Nannocystis	Fe	-0.0550655	0.676034	0.889049
Bacteria	Chloroflexota	Chloroflexia	Chloroflexales	Chloroflexaceae	JAAUSQ01	Fe	0.2831	0.0283934	0.388044
Bacteria	Chloroflexota					Fe	0.104543	0.42665	0.786422
Bacteria	Myxococcota	Polyangia	Polyangiales	SG8-38		Fe	-0.154932	0.237202	0.629074
Bacteria	Proteobacteria	Alphaproteobacteria	Rhizobiales	Phreatobacteraceae	Phreatobacter	Fe	-0.143541	0.273889	0.660555
Bacteria	Verrucomicrobiota	Verrucomicrobiae	Opitutales	Opitutaceae	Palsa-1447	Fe	-0.142136	0.278662	0.66975
Bacteria	Myxococcota	UBA4151	UBA4151	UBA4151	CACGMS01	Fe	0.121747	0.354101	0.736741
Bacteria	Bacteroidota	Bacteroidia	Flavobacteriales	PHOS-HE28	PHOS-HE28	Fe	0.0389761	0.767483	0.93357
Bacteria	Actinobacteriota	Actinomycetia	Streptosporangiales	Streptosporangiaceae	Actinoallomurus	Fe	-0.170961	0.191539	0.560952
Bacteria	Bacteroidota	Bacteroidia	Chitinophagales	LD1	UBA7692	Fe	0.249452	0.0545925	0.458445
Bacteria	Bacteroidota	Bacteroidia	Cytophagales	Spirosomaceae	Ravibacter	Fe	-0.0946532	0.47191	0.801824
Bacteria	Sumerlaeota	Sumerlaeia	Sumerlaeales	Sumerlaeaceae		Fe	0.104871	0.425194	0.786422
Bacteria	Proteobacteria	Alphaproteobacteria	Rhizobiales	Xanthobacteraceae	Variibacter	Fe	0.0769054	0.559192	0.850998
Bacteria	Dependentiae	Babeliae	Babeliales	Babeliaceae	Babela	Fe	-0.244503	0.0597336	0.464347
Bacteria	Proteobacteria	Gammaproteobacteria	Xanthomonadales	Xanthomonadaceae	Lysobacter	Fe	0.06805	0.605419	0.866482
Bacteria	Verrucomicrobiota	Verrucomicrobiae	Chthoniobacterales	Chthoniobacteraceae	VFJQ01	Fe	-0.0390121	0.767274	0.93357
Bacteria	Acidobacteriota	Vicinamibacteria	Fen-336	Fen-336	WYBL01	Fe	0.0121159	0.926795	0.99617
Bacteria	Bacteroidota	Bacteroidia				Fe	0.0938649	0.475625	0.801824
Bacteria	Firmicutes	Bacilli	Bacillales	DSM-18226		Fe	-0.204566	0.116913	0.517387
Bacteria	Patescibacteria	Saccharimonadia	UBA4664	SCTI01	SCTI01	Fe	0.00460954	0.972116	0.999538
Bacteria	Proteobacteria	Gammaproteobacteria	Pseudomonadales	Cellvibrionaceae	Cellvibrio	Fe	-0.0307208	0.815753	0.962064
Bacteria	Bacteroidota	Bacteroidia	Flavobacteriales	Flavobacteriaceae	Flavobacterium	Fe	0.0625965	0.634689	0.875997
Bacteria	Chlamydiota	Chlamydiia	Chlamydiales	Parachlamydiaceae	Neochlamydia	Fe	0.0723416	0.582808	0.85837
Bacteria	Proteobacteria	Alphaproteobacteria	Rhizobiales	Hyphomicrobiaceae		Fe	-0.0645915	0.623913	0.873934
Bacteria	Proteobacteria	Alphaproteobacteria	Rhizobiales	Rhizobiaceae	Neorhizobium	Fe	0.156349	0.232889	0.62432
Bacteria	Proteobacteria	Gammaproteobacteria	Burkholderiales	Burkholderiaceae	Giesbergeria	Fe	-0.141071	0.282314	0.674421
Bacteria	Bacteroidota	Bacteroidia	Cytophagales	Spirosomaceae	Emticicia	Fe	0.206038	0.114247	0.517077
Bacteria	Actinobacteriota	Actinomycetia	Actinomycetales	Microbacteriaceae	Frigoribacterium	Fe	0.245781	0.05837	0.464347
Bacteria	Chloroflexota	Anaerolineae	Aggregatilineales	A4b	OLB13	Fe	-0.00899442	0.945621	0.996976
Bacteria	Chloroflexota	Dehalococcoidia	UBA2979	UBA2979	VXMT01	Fe	-0.0818201	0.534279	0.838913
Bacteria	Planctomycetota	Phycisphaerae	Tepidisphaerales	Tepidisphaeraceae	Tepidisphaera	Fe	-0.223624	0.0858747	0.516923
Bacteria	Proteobacteria	Alphaproteobacteria	Ferrovibrionales	Ferrovibrionaceae	Ferrovibrio	Fe	0.00805238	0.95131	0.996976
Bacteria	Proteobacteria	Alphaproteobacteria	Micavibrionales	Micavibrionaceae		Fe	-0.0140196	0.915332	0.993382
Bacteria	Actinobacteriota	Actinomycetia	Actinomycetales	Demequinaceae	Demequina	Fe	0.143994	0.272362	0.659154
Bacteria	Bacteroidota	Bacteroidia	Chitinophagales	Chitinophagaceae	UBA1930	Fe	0.0575356	0.662361	0.884459
Bacteria	Myxococcota	Polyangia	Polyangiales	Polyangiaceae	Sorangium	Fe	-0.137697	0.294102	0.689674
Bacteria	Patescibacteria					Fe	-0.123225	0.348245	0.731255
Bacteria	Proteobacteria	Gammaproteobacteria	Burkholderiales	WYBJ01	WYBJ01	Fe	-0.0470376	0.721178	0.900827
Bacteria	Actinobacteriota	Acidimicrobiia	Acidimicrobiales	JAAYBP01	Aquihabitans	Fe	0.0701983	0.594052	0.860819
Bacteria	Proteobacteria	Alphaproteobacteria	Caulobacterales	TH1-2		Fe	0.0602823	0.647284	0.881276
Bacteria	Bacteroidota	UBA10030	UBA10030	UBA8401	SpSt-333	Fe	0.0749226	0.569397	0.851988
Bacteria	Proteobacteria	Alphaproteobacteria	Rickettsiales			Fe	0.272961	0.0348479	0.418775
Bacteria	Chloroflexota	Anaerolineae	Anaerolineales	UBA6663	SpSt-583	Fe	-0.122977	0.349225	0.731255
Bacteria	Chloroflexota	Chloroflexia	Chloroflexales	Roseiflexaceae	SDU3-3	Fe	-0.0756272	0.565761	0.851988
Bacteria	Planctomycetota	Brocadiae	Brocadiales			Fe	0.00807577	0.951168	0.996976
Bacteria	Proteobacteria	Gammaproteobacteria	Burkholderiales	Casimicrobiaceae	VBCG01	Fe	0.0915622	0.486565	0.812448
Bacteria	Verrucomicrobiota	Verrucomicrobiae	Chthoniobacterales	Chthoniobacteraceae		Fe	0.0115362	0.930288	0.99617
Bacteria	Verrucomicrobiota	Verrucomicrobiae	Chthoniobacterales	UBA10450	Udaeobacter	Fe	0.0668244	0.611945	0.872241
Bacteria	Actinobacteriota	Actinomycetia	Sporichthyales	Sporichthyaceae	Sporichthya	Fe	0.203557	0.118769	0.517387
Bacteria	Bacteroidota	Bacteroidia	Chitinophagales	Chitinophagaceae	Heliimonas	Fe	-0.196297	0.13279	0.52059
Bacteria	Acidobacteriota	Blastocatellia	Pyrinomonadales			Fe	-0.160455	0.220694	0.609021
Bacteria	Chloroflexota	Ktedonobacteria	Ktedonobacterales	Ktedonobacteraceae	CF-154	Fe	0.279553	0.0305266	0.395364
Bacteria	Proteobacteria	Alphaproteobacteria	Rhizobiales	Methyloligellaceae	Methyloceanibacter	Fe	0.311628	0.0153601	0.356866
Bacteria	Bacteroidota	Bacteroidia	Chitinophagales	Chitinophagaceae	Puia	Fe	0.235774	0.0697482	0.479599
Bacteria	Bacteroidota	Bacteroidia	Sphingobacteriales	Sphingobacteriaceae	Daejeonella	Fe	0.010859	0.934371	0.996211
Bacteria	Bacteroidota	Kapabacteria	OLB7	OLB7	OLB7	Fe	0.0322387	0.80682	0.958013
Bacteria	Patescibacteria	Paceibacteria	UBA9983	PALSA-1337	C7867-002	Fe	0.250037	0.0540088	0.458445
Bacteria	Proteobacteria	Alphaproteobacteria	Caulobacterales	TH1-2	VFBF01	Fe	0.17553	0.179761	0.559346
Bacteria	Proteobacteria	Alphaproteobacteria	Rhodospirillales	Magnetospirillaceae		Fe	0.13307	0.310777	0.705575
Bacteria	Proteobacteria	Gammaproteobacteria	DSM-16500	DSM-16500		Fe	0.290441	0.0243734	0.380973
Bacteria	Bacteroidota	Bacteroidia	Cytophagales	Spirosomaceae	Leadbetterella	Fe	0.000579637	0.996493	0.999753
Bacteria	Chloroflexota	Anaerolineae	Aggregatilineales	J027	JAAUUD01	Fe	0.068064	0.605344	0.866482
Bacteria	Chloroflexota	Dehalococcoidia	Tepidiformales	Tepidiformaceae	Tepidiforma	Fe	0.31703	0.0135841	0.344206
Bacteria	Firmicutes	Bacilli	Thermoactinomycetales	DSM-44946	Planifilum	Fe	0.25866	0.0459851	0.448323
Bacteria	Chlamydiota	Chlamydiia	Chlamydiales	Parachlamydiaceae		Fe	-0.138982	0.289576	0.681873
Bacteria	Chloroflexota	Chloroflexia	Chloroflexales	Herpetosiphonaceae	Herpetosiphon	Fe	-0.0508922	0.699373	0.89279
Bacteria	Proteobacteria	Alphaproteobacteria	Rs-D84			Fe	-0.0141148	0.914759	0.993382
Bacteria	Verrucomicrobiota	Verrucomicrobiae	Chthoniobacterales	Xiphinematobacteraceae	Xiphinematobacter	Fe	-0.279274	0.0307003	0.395364
Bacteria	Verrucomicrobiota	Verrucomicrobiae	Opitutales	Opitutaceae	IMCC26134	Fe	0.154724	0.237841	0.629074
Bacteria	Verrucomicrobiota	Verrucomicrobiae	Verrucomicrobiales	Akkermansiaceae		Fe	0.117571	0.370973	0.741424
Bacteria	Actinobacteriota	Thermoleophilia	Gaiellales	Gaiellaceae	Gaiella	Fe	0.170131	0.193735	0.560952
Bacteria	Firmicutes	Bacilli	Tumebacillales	Tumebacillaceae	Tumebacillus	Fe	-0.0888685	0.49953	0.818179
Bacteria	Proteobacteria	Alphaproteobacteria	Dongiales	Dongiaceae	Hypericibacter	Fe	-0.00886774	0.946386	0.996976
Bacteria	Acidobacteriota	Acidobacteriae	Acidobacteriales	Koribacteraceae	TOLSYN	Fe	0.204683	0.1167	0.517387
Bacteria	Bacteroidota	Bacteroidia	Chitinophagales	Chitinophagaceae	Nemorincola	Fe	0.295847	0.0217302	0.375735
Bacteria	Bdellovibrionota	Oligoflexia	Oligoflexales	Oligoflexaceae	Oligoflexus	Fe	-0.209289	0.108522	0.516923
Bacteria	Chloroflexota	Dehalococcoidia				Fe	0.217667	0.0947867	0.516923
Bacteria	Patescibacteria	ABY1	Magasanikbacterales	GWA2-37-8	XYD2-FULL-39-9	Fe	-0.094246	0.473827	0.801824
Bacteria	Proteobacteria	Alphaproteobacteria	Rhodospirillales	UXAT02	Defluviicoccus	Fe	-0.200345	0.124827	0.52059
Bacteria	Proteobacteria	Alphaproteobacteria	Sphingomonadales	Kordiimonadaceae	Kordiimonas	Fe	0.163879	0.21087	0.592648
Bacteria	Verrucomicrobiota	Verrucomicrobiae	Verrucomicrobiales	Akkermansiaceae	Haloferula	Fe	-0.0315921	0.810622	0.96001
Bacteria	Verrucomicrobiota	Verrucomicrobiae	Verrucomicrobiales	Akkermansiaceae	Luteolibacter	Fe	0.0826309	0.530222	0.838913
Bacteria	Acidobacteriota	Acidobacteriae	Bryobacterales	Bryobacteraceae	Bryobacter	Fe	0.0235188	0.858434	0.974476
Bacteria	Actinobacteriota	Thermoleophilia	Solirubrobacterales	70-9	67-14	Fe	-0.00235413	0.985757	0.999753
Bacteria	Actinobacteriota	Thermoleophilia	Solirubrobacterales	Solirubrobacteraceae	Solirubrobacter	Fe	-0.200305	0.124902	0.52059
Bacteria	Bacteroidota	Bacteroidia	Chitinophagales	Chitinophagaceae	Terrimonas	Fe	-0.0176004	0.893818	0.986174
Bacteria	Chloroflexota	Dehalococcoidia	UBA2979	UBA2979	W-Chloroflexi-9	Fe	0.168425	0.19831	0.564172
Bacteria	Firmicutes	Bacilli	Paenibacillales			Fe	-0.107407	0.41402	0.776058
Bacteria	Myxococcota	Polyangia	Polyangiales	Polyangiaceae	MWCO01	Fe	-0.124475	0.34334	0.728779
Bacteria	Proteobacteria	Alphaproteobacteria	DSM-16000	Inquilinaceae	Inquilinus	Fe	0.173114	0.185923	0.560952
Bacteria	Proteobacteria	Alphaproteobacteria	Rhizobiales	Aestuariivirgaceae	Nordella	Fe	-0.146425	0.264261	0.644021
Bacteria	Proteobacteria	Gammaproteobacteria	Burkholderiales	Methylophilaceae	Methylophilus	Fe	-0.351021	0.00596146	0.19677
Bacteria	Acidobacteriota	Acidobacteriae	Acidobacteriales	Acidobacteriaceae	Terracidiphilus	Fe	-0.02037	0.877229	0.983973
Bacteria	Actinobacteriota	Actinomycetia	Mycobacteriales			Fe	-0.100153	0.446432	0.789753
Bacteria	Deinococcota	Deinococci	Deinococcales	Trueperaceae	CSSed10-48	Fe	0.286831	0.026286	0.380973
Bacteria	Planctomycetota	Planctomycetia	Pan216	Pan216	Pan216	Fe	0.196393	0.132596	0.52059
Bacteria	Planctomycetota	UBA1135	UBA1135	GCA-002686595	WYBT01	Fe	0.00743096	0.955063	0.996976
Bacteria	Proteobacteria	Alphaproteobacteria	Minwuiales	Minwuiaceae	Minwuia	Fe	0.0100237	0.93941	0.996976
Bacteria	Proteobacteria	Alphaproteobacteria	Sphingomonadales			Fe	-0.104051	0.428843	0.786422
Bacteria	Acidobacteriota	Blastocatellia	Pyrinomonadales	Pyrinomonadaceae	PSRF01	Fe	0.266128	0.0398523	0.440906
Bacteria	Bacteroidota	Ignavibacteria	SJA-28	B-1AR	UBA2330	Fe	-0.0869424	0.508908	0.821165
Bacteria	Bdellovibrionota	FAC87	UBA2466	UBA2466		Fe	0.0686286	0.602348	0.866482
Bacteria	Chloroflexota	Anaerolineae	Aggregatilineales	A4b	GCA-2699585	Fe	0.0295053	0.822922	0.963474
Bacteria	Chloroflexota	Anaerolineae	Anaerolineales	EnvOPS12	OLB14	Fe	-0.152004	0.246294	0.634788
Bacteria	Proteobacteria	Alphaproteobacteria	Rhizobiales	Rhizobiaceae	Aquamicrobium	Fe	-0.0429736	0.744409	0.920542
Bacteria	Proteobacteria					Fe	0.137043	0.296423	0.690993
Bacteria	Acidobacteriota	Acidobacteriae	Acidobacteriales	SbA1	Sulfotelmatobacter	Fe	0.0381027	0.772552	0.936467
Bacteria	Planctomycetota	Planctomycetia	Pirellulales	Lacipirellulaceae	Posidoniimonas	Fe	0.158583	0.226198	0.613472
Bacteria	Acidobacteriota	Acidobacteriae	Acidobacteriales	Acidobacteriaceae	Silvibacterium	Fe	0.0613782	0.641307	0.876785
Bacteria	Bdellovibrionota	Bdellovibrionia	Bdellovibrionales			Fe	0.22285	0.0869938	0.516923
Bacteria	Gemmatimonadota	Gemmatimonadetes	Gemmatimonadales	GWC2-71-9	JABFSM01	Fe	0.0636759	0.628849	0.873934
Bacteria	Nitrospirota	Nitrospiria	Nitrospirales	Nitrospiraceae	Nitrospira	Fe	0.0141248	0.914699	0.993382
Bacteria	Proteobacteria	Alphaproteobacteria	Caulobacterales	TH1-2	Terricaulis	Fe	-0.230433	0.0765103	0.49839
Bacteria	Proteobacteria	Alphaproteobacteria	RUG11792	RUG11792	RUG11420	Fe	0.261646	0.0434461	0.448323
Bacteria	Proteobacteria	Alphaproteobacteria	Rhodobacterales	Rhodobacteraceae	Poseidonocella	Fe	0.0749073	0.569476	0.851988
Bacteria	Proteobacteria	Gammaproteobacteria	Burkholderiales	Burkholderiaceae	Hydrogenophaga	Fe	-0.157421	0.22966	0.620439
Bacteria	Actinobacteriota	Actinomycetia	Streptosporangiales	Streptosporangiaceae	Thermostaphylospora	Fe	0.0259986	0.843686	0.964015
Bacteria	Chlamydiota	Chlamydiia	Chlamydiales	Rhabdochlamydiaceae	Ga0074140	Fe	0.209034	0.108962	0.516923
Bacteria	Chloroflexota	Chloroflexia	Thermomicrobiales	Thermomicrobiaceae	Sphaerobacter	Fe	0.0710654	0.589491	0.85837
Bacteria	Dependentiae	Babeliae	Babeliales			Fe	-0.0423186	0.748175	0.921339
Bacteria	Patescibacteria	Gracilibacteria	Peribacterales	Peribacteraceae	VMFU01	Fe	-0.0147816	0.910748	0.993382
Bacteria	Patescibacteria	Saccharimonadia	Saccharimonadales	UBA4665	GCA-2746885	Fe	-0.0267783	0.83906	0.963474
Bacteria	Proteobacteria	Alphaproteobacteria	Reyranellales	Reyranellaceae	SYSU-D60007	Fe	0.218889	0.0929026	0.516923
Bacteria	Proteobacteria	Gammaproteobacteria	Steroidobacterales	Steroidobacteraceae	Povalibacter	Fe	-0.0148438	0.910374	0.993382
Bacteria	Actinobacteriota	Actinomycetia	Mycobacteriales	Micromonosporaceae		Fe	0.0680788	0.605265	0.866482
Bacteria	Bacteroidota	Bacteroidia	Chitinophagales	Chitinophagaceae	Foetidibacter	Fe	-0.245781	0.05837	0.464347
Bacteria	Proteobacteria	Gammaproteobacteria	Methylococcales	Methylococcaceae	Methylocaldum	Fe	0.203927	0.118087	0.517387
Bacteria	Actinobacteriota	Actinomycetia	Actinomycetales	Microbacteriaceae	Leucobacter	Fe	-0.0263113	0.84183	0.963474
Bacteria	Armatimonadota	Fimbriimonadia	Fimbriimonadales	Fimbriimonadaceae		Fe	0.120502	0.35908	0.736926
Bacteria	Bacteroidota	Bacteroidia	Chitinophagales	Saprospiraceae		Fe	0.314718	0.0143214	0.344206
Bacteria	Cyanobacteria	Cyanobacteriia	Cyanobacteriales	Coleofasciculaceae	SIO2C1	Fe	0.125703	0.33856	0.726081
Bacteria	Planctomycetota	Planctomycetia	Pirellulales	Lacipirellulaceae	Bythopirellula	Fe	-0.0134013	0.919053	0.993912
Bacteria	Planctomycetota	Planctomycetia	Pirellulales	Lacipirellulaceae	Lacipirellula	Fe	0.190185	0.145532	0.52059
Bacteria	Planctomycetota	Planctomycetia	Planctomycetales			Fe	-0.107113	0.415308	0.776058
Bacteria	Acidobacteriota	Blastocatellia	UBA7656	UBA7656	QHVH01	Fe	0.018575	0.887975	0.983973
Bacteria	Actinobacteriota	Actinomycetia	Nitriliruptorales	Nitriliruptoraceae	CSBr16-57R1	Fe	0.137481	0.294868	0.689674
Bacteria	Armatimonadota	Fimbriimonadia	Fimbriimonadales	Fimbriimonadaceae	55-13	Fe	0.10168	0.439492	0.786422
Bacteria	Bdellovibrionota	Bdellovibrionia	Bdellovibrionales	Bdellovibrionaceae	Ga0074137	Fe	0.000579988	0.996491	0.999753
Bacteria	Bdellovibrionota	UBA2361	UBA2361	RFPC01	RFPC01	Fe	0.0210401	0.873224	0.983973
Bacteria	Elusimicrobiota	Elusimicrobia				Fe	-0.0613546	0.641436	0.876785
Bacteria	Fibrobacterota	Chitinivibrionia	Chitinivibrionales	Chitinispirillaceae	Chitinispirillum	Fe	0.148899	0.256188	0.642313
Bacteria	Firmicutes	Symbiobacteriia	Symbiobacteriales	Symbiobacteriaceae	Symbiobacterium	Fe	0.0196442	0.881572	0.983973
Bacteria	Patescibacteria	ABY1	SG8-24	2-12-FULL-60-25	SZUA-46	Fe	-0.0292795	0.824256	0.963474
Bacteria	Patescibacteria	Doudnabacteria	UBA920	O2-02-FULL-48-8	O2-12-FULL-42-9	Fe	-0.209776	0.107684	0.516923
Bacteria	Proteobacteria	Alphaproteobacteria	Acetobacterales	Acetobacteraceae	Roseomonas	Fe	-0.0263113	0.84183	0.963474
Bacteria	Proteobacteria	Gammaproteobacteria	Pseudomonadales	Porticoccaceae	SZUA-272	Fe	-0.208346	0.110159	0.516923
Bacteria	Verrucomicrobiota	Verrucomicrobiae	Pedosphaerales			Fe	-0.190262	0.145365	0.52059
Bacteria	Chlamydiota	Chlamydiia	Chlamydiales	Parachlamydiaceae	Rubidus	Fe	0.235417	0.0701852	0.479599
Bacteria	Proteobacteria	Alphaproteobacteria	Reyranellales	Reyranellaceae		Fe	0.224517	0.0845975	0.516923
Bacteria	Acidobacteriota	Acidobacteriae	Acidobacteriales	Acidobacteriaceae		Fe	0.131556	0.316364	0.707077
Bacteria	Acidobacteriota	UBA6911	UBA6911	UBA6911	Gp18-AA60	Fe	0.150117	0.252276	0.634788
Bacteria	Actinobacteriota	Acidimicrobiia	Acidimicrobiales	Ilumatobacteraceae		Fe	-0.0965035	0.463252	0.801207
Bacteria	Bacteroidota	Bacteroidia	Cytophagales	Spirosomaceae	Persicitalea	Fe	-0.0722779	0.58314	0.85837
Bacteria	Bacteroidota	Bacteroidia	Flavobacteriales	Flavobacteriaceae	Aequorivita	Fe	0.335459	0.00878793	0.258017
Bacteria	Chloroflexota	Anaerolineae	Anaerolineales	UBA11579	OMJR01	Fe	-0.0194237	0.882892	0.983973
Bacteria	Chloroflexota	Dehalococcoidia	UBA2985	UBA2985	VEXC01	Fe	-0.0112763	0.931855	0.99617
Bacteria	Desulfobacterota	DSM-4660	Desulfatiglandales	HGW-15		Fe	0.27848	0.031198	0.395364
Bacteria	Firmicutes	Halanaerobiia	Halanaerobiales			Fe	0.0518185	0.694168	0.889746
Bacteria	Planctomycetota	Phycisphaerae	Phycisphaerales	SM1A02	UBA966	Fe	0.129986	0.322225	0.712125
Bacteria	Proteobacteria	Alphaproteobacteria	ATCC43930	Stellaceae	URHD0088	Fe	0.0965035	0.463252	0.801207
Bacteria	Actinobacteriota	Acidimicrobiia	UBA5794	UBA5794	SZUA-442	Fe	-0.124561	0.343005	0.728779
Bacteria	Desulfobacterota	Binatia	UBA9968	UBA9968		Fe	0.22139	0.089136	0.516923
Bacteria	Firmicutes	Sulfobacillia	Sulfobacillales	Sulfobacillaceae		Fe	-0.134845	0.304309	0.695421
Bacteria	Patescibacteria	UBA1384				Fe	0.00339501	0.979461	0.999538
Bacteria	Planctomycetota	UBA8108	UBA1146			Fe	0.0783317	0.551906	0.841747
Bacteria	Proteobacteria	Alphaproteobacteria	Azospirillales	Azospirillaceae	Indioceanicola	Fe	0.0668786	0.611656	0.872241
Bacteria	Proteobacteria	Alphaproteobacteria	Paracaedibacterales	UBA11393	Finniella	Fe	0.0235984	0.85796	0.974476
Bacteria	Proteobacteria	Alphaproteobacteria	UBA9219	UBA9219	UBA8914	Fe	-0.129049	0.325758	0.712125
Bacteria	Proteobacteria	Gammaproteobacteria	Burkholderiales	SG8-39	VBDM01	Fe	0.000515017	0.996884	0.999753
Bacteria	Proteobacteria	Gammaproteobacteria	Methylococcales	Methylococcaceae		Fe	0.0600363	0.648629	0.881276
Bacteria	Actinobacteriota	Actinomycetia	Propionibacteriales	Nocardioidaceae		Fe	0.0789338	0.548844	0.838913
Bacteria	Firmicutes	Bacilli	Bacillales	DSM-18226	Bacillus	Fe	0.206731	0.113007	0.516923
Bacteria	Firmicutes	UBA4882	UBA8346	UBA8346	Hydrogenispora	Fe	0.0992593	0.450518	0.79096
Bacteria	Proteobacteria	Gammaproteobacteria	Nevskiales	Nevskiaceae	Alkanibacter	Fe	-0.188155	0.149959	0.52059
Bacteria	Actinobacteriota	Actinomycetia	Mycobacteriales	Micromonosporaceae	Micromonospora	Fe	-0.101486	0.44037	0.786422
Bacteria	Armatimonadota	Armatimonadia	Armatimonadales	Capsulimonadaceae	Capsulimonas	Fe	-0.00536131	0.967571	0.999538
Bacteria	Bacteroidota	Bacteroidia	Cytophagales	Cyclobacteriaceae	Imperialibacter	Fe	-0.0502997	0.702709	0.893775
Bacteria	Bdellovibrionota	Bdellovibrionia	UBA1018	UBA923	UBA923	Fe	0.0187938	0.886665	0.983973
Bacteria	Chloroflexota	Dehalococcoidia	UBA2979	UBA2979	SURF-43	Fe	0.184179	0.158919	0.52059
Bacteria	Chloroflexota	Limnocylindria	QHBO01	QHBO01	CF-167	Fe	0.109772	0.403756	0.770973
Bacteria	Dependentiae	Babeliae	Babeliales	Vermiphilaceae		Fe	0.150117	0.252276	0.634788
Bacteria	Gemmatimonadota	Gemmatimonadetes	Gemmatimonadales	GWC2-71-9		Fe	-0.176661	0.176928	0.55549
Bacteria	Hydrogenedentota	Hydrogenedentia	Hydrogenedentiales			Fe	0.147317	0.261332	0.644021
Bacteria	Proteobacteria	Alphaproteobacteria	Micavibrionales	Micavibrionaceae	Micavibrio	Fe	0.147957	0.259242	0.644021
Bacteria	Proteobacteria	Alphaproteobacteria	Rhizobiales	Kaistiaceae		Fe	-0.154109	0.239735	0.629074
Bacteria	Proteobacteria	Alphaproteobacteria	Rickettsiales	Anaplasmataceae		Fe	-0.153205	0.242537	0.629074
Bacteria	Proteobacteria	Gammaproteobacteria	Coxiellales	Coxiellaceae		Fe	-0.247389	0.0566901	0.464347
Bacteria	Proteobacteria	Gammaproteobacteria	Methylococcales	Methylococcaceae	UBA6136	Fe	0.0996166	0.448881	0.790776
Bacteria	Verrucomicrobiota	Verrucomicrobiae	Opitutales	Opitutaceae		Fe	-0.0636211	0.629145	0.873934
Bacteria	Actinobacteriota	Acidimicrobiia	Acidimicrobiales			Fe	0.235417	0.0701852	0.479599
Bacteria	Actinobacteriota	Thermoleophilia	Gaiellales	Gaiellaceae		Fe	-0.221766	0.0885801	0.516923
Bacteria	Bacteroidota	Bacteroidia	Chitinophagales	Saprospiraceae	Lewinella	Fe	0.101486	0.44037	0.786422
Bacteria	Bacteroidota	Kapabacteria	Kapabacteriales	UBA2268	PGYR01	Fe	0.224875	0.0840906	0.516923
Bacteria	Chlamydiota	Chlamydiia	Chlamydiales	Parachlamydiaceae	Protochlamydia	Fe	-0.166424	0.203771	0.577351
Bacteria	Chloroflexota	Anaerolineae	Anaerolineales	UBA4823	UTCFX2	Fe	0.0475301	0.718379	0.898941
Bacteria	Chloroflexota	Chloroflexia				Fe	0.0545881	0.678689	0.889563
Bacteria	Deinococcota	Deinococci	Deinococcales	Deinococcaceae	Deinococcus	Fe	0.00991699	0.940054	0.996976
Bacteria	Eremiobacterota	Eremiobacteria	Baltobacterales	Baltobacteraceae		Fe	-0.0187938	0.886665	0.983973
Bacteria	Firmicutes	Bacilli	Bacillales	DSM-18226	Robertmurraya	Fe	0.0864513	0.511314	0.821165
Bacteria	Firmicutes	Bacilli	Paenibacillales	Paenibacillaceae		Fe	-0.00393106	0.976219	0.999538
Bacteria	Firmicutes	Clostridia	Lachnospirales	Lachnospiraceae		Fe	0.0706309	0.591775	0.859306
Bacteria	Myxococcota	WYAZ01	WYAZ01	WYAZ01	WYAZ01	Fe	0.0064745	0.960842	0.999538
Bacteria	Nitrospirota	Nitrospiria	Nitrospirales	Nitrospiraceae	Palsa-1315	Fe	-0.0789338	0.548844	0.838913
Bacteria	Patescibacteria	Paceibacteria	UBA9983	UBA6065	UBA6065	Fe	0.211819	0.104221	0.516923
Bacteria	Patescibacteria	Paceibacteria	UBA9983	Zambryskibacteraceae	C7867-005	Fe	0.1467	0.263356	0.644021
Bacteria	Planctomycetota	B15-G4	B15-G4	B15-G4	B15-G4	Fe	0.00848752	0.948682	0.996976
Bacteria	Planctomycetota	Planctomycetia	Pirellulales	UBA1268		Fe	0.083727	0.524762	0.838897
Bacteria	Proteobacteria	Alphaproteobacteria	Geminicoccales	Geminicoccaceae		Fe	0.28938	0.0249232	0.380973
Bacteria	Proteobacteria	Alphaproteobacteria	Rhizobiales	Stappiaceae	Pseudovibrio	Fe	-0.221766	0.0885801	0.516923
Bacteria	Proteobacteria	Alphaproteobacteria	Rhizobiales			Fe	-0.0263113	0.84183	0.963474
Bacteria	Proteobacteria	Alphaproteobacteria	Rhodospirillales	Rhodospirillaceae	GCA-2737725	Fe	0.0563813	0.668738	0.884459
Bacteria	Proteobacteria	Gammaproteobacteria	Berkiellales			Fe	0.191696	0.142299	0.52059
Bacteria	Proteobacteria	Gammaproteobacteria	Burkholderiales	Burkholderiaceae	Cupriavidus	Fe	0.206731	0.113007	0.516923
Bacteria	Proteobacteria	Gammaproteobacteria	Burkholderiales			Fe	0.023229	0.860161	0.974849
Bacteria	Proteobacteria	Gammaproteobacteria	Steroidobacterales	Steroidobacteraceae	Steroidobacter	Fe	0.00375875	0.977261	0.999538
Bacteria	Proteobacteria	Gammaproteobacteria	VBWC01	VBWC01	VBWC01	Fe	-0.165819	0.205442	0.579729
Bacteria	Verrucomicrobiota	Verrucomicrobiae	Chthoniobacterales			Fe	0.0653092	0.620056	0.873934
Bacteria	Verrucomicrobiota	Verrucomicrobiae	Opitutales			Fe	-0.154064	0.239874	0.629074
Bacteria	Acidobacteriota	Blastocatellia	Pyrinomonadales	Blastocatellaceae	Aridibacter	Fe	-0.116521	0.375289	0.741424
Bacteria	Actinobacteriota	Actinomycetia	Mycobacteriales	Mycobacteriaceae	Rhodococcus	Fe	0.169144	0.196373	0.560952
Bacteria	Actinobacteriota	UBA4738	UBA4738	HRBIN12	AC-51	Fe	-0.0789338	0.548844	0.838913
Bacteria	Armatimonadota	Armatimonadia	Armatimonadales	Armatimonadaceae	Armatimonas	Fe	0.214452	0.099887	0.516923
Bacteria	Bacteroidota	Bacteroidia	Chitinophagales	Chitinophagaceae	Ferruginibacter	Fe	-0.116521	0.375289	0.741424
Bacteria	Bacteroidota	Bacteroidia	Chitinophagales	Chitinophagaceae	VBAR01	Fe	0.191696	0.142299	0.52059
Bacteria	Bacteroidota					Fe	-0.124039	0.345046	0.728779
Bacteria	Chlamydiota	Chlamydiia	Chlamydiales			Fe	-0.257343	0.0471438	0.448323
Bacteria	Chloroflexota	Anaerolineae	Aggregatilineales			Fe	-0.116521	0.375289	0.741424
Bacteria	Chloroflexota	Anaerolineae	UBA4142	UBA4142	UBA4142	Fe	0.0256412	0.845808	0.964858
Bacteria	Chloroflexota	Dehalococcoidia	DSGV01	DSGV01	DSGV01	Fe	0.0864513	0.511314	0.821165
Bacteria	Cyanobacteria	Cyanobacteriia	GCF-001939115	GCF-001939115	GCF-001939115	Fe	0.139074	0.289254	0.681873
Bacteria	Deinococcota	Deinococci	Deinococcales	Trueperaceae	JAABTL01	Fe	0.0182463	0.889945	0.98459
Bacteria	Desulfobacterota	Binatia	Bin18	Bin18	JABFSC01	Fe	0.00375875	0.977261	0.999538
Bacteria	Desulfobacterota	Binatia	HRBIN30	HRBIN30	HRBIN30	Fe	-0.0428905	0.744887	0.920542
Bacteria	Eisenbacteria	RBG-16-71-46	RBG-16-71-46	RBG-16-71-46	RBG-16-71-46	Fe	0.191696	0.142299	0.52059
Bacteria	Elusimicrobiota	Elusimicrobia	UBA1565	UBA9628	GWA2-66-18	Fe	-0.069697	0.596696	0.86107
Bacteria	Eremiobacterota	Xenobia	Xenobiales			Fe	0.101311	0.441164	0.786422
Bacteria	Firmicutes	Bacilli	Alicyclobacillales	Alicyclobacillaceae		Fe	0.0263113	0.84183	0.963474
Bacteria	Firmicutes	Bacilli	Thermoactinomycetales	Thermoactinomycetaceae	Thermoflavimicrobium	Fe	-0.176661	0.176928	0.55549
Bacteria	Gemmatimonadota	Gemmatimonadetes	Gemmatimonadales	Gemmatimonadaceae	SCN-70-22	Fe	0.101486	0.44037	0.786422
Bacteria	Myxococcota	UBA9042	UBA9042			Fe	0.169144	0.196373	0.560952
Bacteria	Patescibacteria	Paceibacteria	UBA9983	SBAW01	GWA1-54-10	Fe	0.0160839	0.902921	0.988621
Bacteria	Patescibacteria	Paceibacteria	UBA9983	XYD1-FULL-46-19		Fe	0.217043	0.0957607	0.516923
Bacteria	Planctomycetota	Phycisphaerae	Phycisphaerales	UBA1924	UBA6054	Fe	-0.069697	0.596696	0.86107
Bacteria	Proteobacteria	Alphaproteobacteria	Azospirillales	Azospirillaceae		Fe	0.170018	0.194036	0.560952
Bacteria	Proteobacteria	Alphaproteobacteria	Micropepsales			Fe	0.0428905	0.744887	0.920542
Bacteria	Proteobacteria	Alphaproteobacteria	Paracaedibacterales	Paracaedibacteraceae		Fe	0	1	1
Bacteria	Proteobacteria	Alphaproteobacteria	Rhizobiales	Beijerinckiaceae	Chelatococcus	Fe	-0.169144	0.196373	0.560952
Bacteria	Proteobacteria	Alphaproteobacteria	Rhodobacterales	Rhodobacteraceae	Amaricoccus	Fe	0.241259	0.0633103	0.464498
Bacteria	Proteobacteria	Gammaproteobacteria	Burkholderiales	Burkholderiaceae	Comamonas	Fe	-0.0263113	0.84183	0.963474
Bacteria	Proteobacteria	Gammaproteobacteria	Burkholderiales	Rhodocyclaceae		Fe	-0.0338288	0.797489	0.951798
Bacteria	Verrucomicrobiota	Kiritimatiellae	SLAD01	WLWN01	WLWN01	Fe	-0.0635678	0.629433	0.873934
Bacteria	Acidobacteriota	Acidobacteriae	20CM-2-55-15	20CM-2-55-15	DSPE01	Fe	0.28393	0.0279129	0.388044
Bacteria	Acidobacteriota	Mor1	Mor1	Mor1	Mor1	Fe	0.0488638	0.710819	0.895323
Bacteria	Actinobacteriota	Actinomycetia	Mycobacteriales	Mycobacteriaceae		Fe	-0.131691	0.315866	0.707077
Bacteria	Actinobacteriota	Thermoleophilia	Gaiellales	Gaiellaceae	GMQP-bins7	Fe	0.0488638	0.710819	0.895323
Bacteria	Actinobacteriota	Thermoleophilia	Miltoncostaeales	Miltoncostaeaceae	Miltoncostaea	Fe	0.184179	0.158919	0.52059
Bacteria	Bacteroidota	Bacteroidia	Chitinophagales	Saprospiraceae	UBA2329	Fe	0.0112763	0.931855	0.99617
Bacteria	Bacteroidota	Bacteroidia	Cytophagales	Hymenobacteraceae	Adhaeribacter	Fe	0.0488638	0.710819	0.895323
Bacteria	Bacteroidota	Bacteroidia	Flavobacteriales	Flavobacteriaceae		Fe	0.0939688	0.475134	0.801824
Bacteria	Bacteroidota	Bacteroidia	Flavobacteriales	Weeksellaceae	Kaistella	Fe	-0.0429736	0.744409	0.920542
Bacteria	Bacteroidota	Ignavibacteria	Ignavibacteriales	Ignavibacteriaceae		Fe	-0.0712951	0.588285	0.85837
Bacteria	Bdellovibrionota	Bdellovibrionia	Bdellovibrionales	Bdellovibrionaceae		Fe	0.268116	0.0383382	0.430996
Bacteria	Bdellovibrionota	Oligoflexia	Silvanigrellales	Silvanigrellaceae	Silvanigrella	Fe	-0.0563813	0.668738	0.884459
Bacteria	Chloroflexota	Anaerolineae	Promineofilales	Promineofilaceae	Promineofilum	Fe	0.026356	0.841565	0.963474
Bacteria	Deinococcota	Deinococci	Deinococcales	Trueperaceae	Truepera	Fe	-0.1291	0.325565	0.712125
Bacteria	Dependentiae	Babeliae	Babeliales	GWF2-32-72	GWF2-32-72	Fe	0.131244	0.317525	0.707077
Bacteria	Desulfobacterota	Syntrophobacteria	Syntrophobacterales	Syntrophobacteraceae	Desulfovirga	Fe	0.00375875	0.977261	0.999538
Bacteria	Firmicutes	Bacilli	Thermoactinomycetales	DSM-45169		Fe	0.199214	0.127014	0.52059
Bacteria	Firmicutes	Clostridia	Peptostreptococcales			Fe	0.139074	0.289254	0.681873
Bacteria	Firmicutes	Desulfotomaculia	Desulfotomaculales			Fe	0.139074	0.289254	0.681873
Bacteria	Firmicutes	Limnochordia	Limnochordales	ZCTH02-B6	ZCTH02-B6	Fe	0.00375875	0.977261	0.999538
Bacteria	Firmicutes	Limnochordia				Fe	-0.0864513	0.511314	0.821165
Bacteria	Firmicutes	UBA4882	UBA10575	UBA10575	Capillibacterium	Fe	0.116521	0.375289	0.741424
Bacteria	Gemmatimonadota	Gemmatimonadetes	Longimicrobiales	UBA6960	UBA2982	Fe	0.101486	0.44037	0.786422
Bacteria	Myxococcota	Polyangia	Polyangiales	Polyangiaceae	Polyangium	Fe	0.0187938	0.886665	0.983973
Bacteria	Myxococcota	UBA9160	UBA9160	PR03	CAADGG01	Fe	0.206731	0.113007	0.516923
Bacteria	Nitrospirota	Nitrospiria	Nitrospirales	Nitrospiraceae	40CM-3-62-11	Fe	0.0112763	0.931855	0.99617
Bacteria	Patescibacteria	Paceibacteria	UBA9983	UBA918		Fe	0.295187	0.0220393	0.375735
Bacteria	Patescibacteria	Paceibacteria	UBA9983	Zambryskibacteraceae	UBA910	Fe	-0.0765663	0.560931	0.851784
Bacteria	Patescibacteria	Saccharimonadia	Saccharimonadales	UBA1020	UBA1020	Fe	-0.132048	0.314543	0.707077
Bacteria	Patescibacteria	Saccharimonadia	Saccharimonadales	UBA4665	UBA4665	Fe	-0.0714163	0.58765	0.85837
Bacteria	Planctomycetota	Phycisphaerae	UBA1845	UTPLA1	ECT2AJA-110-A	Fe	0.11552	0.379436	0.745614
Bacteria	Planctomycetota	Planctomycetia	Gemmatales	Gemmataceae	Fimbriiglobus	Fe	0.184179	0.158919	0.52059
Bacteria	Planctomycetota	Planctomycetia	Planctomycetales	Planctomycetaceae	MB-PLM-1	Fe	0.0939688	0.475134	0.801824
Bacteria	Proteobacteria	Alphaproteobacteria	Acetobacterales	Acetobacteraceae	Acidisoma	Fe	-0.214249	0.100217	0.516923
Bacteria	Proteobacteria	Alphaproteobacteria	Holosporales	Holosporaceae		Fe	-0.187797	0.150749	0.52059
Bacteria	Proteobacteria	Alphaproteobacteria	Kiloniellales			Fe	0.0789338	0.548844	0.838913
Bacteria	Proteobacteria	Alphaproteobacteria	Rhizobiales	Labraceae	Labrys	Fe	0.214249	0.100217	0.516923
Bacteria	Sumerlaeota	Sumerlaeia	Sumerlaeales			Fe	0.0187938	0.886665	0.983973
Bacteria	Verrucomicrobiota	Verrucomicrobiae	Chthoniobacterales	UBA10450		Fe	0.0112763	0.931855	0.99617
Bacteria	Acidobacteriota	Acidobacteriae				Fe	0.206731	0.113007	0.516923
Bacteria	Acidobacteriota	Blastocatellia	Pyrinomonadales	Blastocatellaceae	Stenotrophobacter	Fe	0.169144	0.196373	0.560952
Bacteria	Acidobacteriota	Blastocatellia	Pyrinomonadales	Blastocatellaceae		Fe	-0.0338288	0.797489	0.951798
Bacteria	Acidobacteriota	Thermoanaerobaculia	UBA5066	Gp7-AA6	Gp7-AA6	Fe	0.0864513	0.511314	0.821165
Bacteria	Actinobacteriota	Actinomycetia	Mycobacteriales	Geodermatophilaceae	Modestobacter	Fe	-0.0563813	0.668738	0.884459
Bacteria	Bacteroidota	Bacteroidia	AKYH767	B-17BO		Fe	0.101486	0.44037	0.786422
Bacteria	Bacteroidota	Bacteroidia	Bacteroidales	Prolixibacteraceae	Tangfeifania	Fe	-0.191696	0.142299	0.52059
Bacteria	Bacteroidota	Bacteroidia	Cytophagales	Spirosomaceae	Larkinella	Fe	-0.0789338	0.548844	0.838913
Bacteria	Bacteroidota	Bacteroidia	Cytophagales			Fe	-0.00375875	0.977261	0.999538
Bacteria	Chlamydiota	Chlamydiia	Chlamydiales	Rhabdochlamydiaceae		Fe	-0.0714163	0.58765	0.85837
Bacteria	Chloroflexota	Dehalococcoidia	Tepidiformales	Tepidiformaceae	SLAK01	Fe	0.184179	0.158919	0.52059
Bacteria	Chloroflexota	Ktedonobacteria	Ktedonobacterales	Ktedonobacteraceae	UBA11361	Fe	0.0789338	0.548844	0.838913
Bacteria	Cyanobacteria	Cyanobacteriia	Cyanobacteriales	Microcoleaceae	Microcoleus	Fe	-0.0789338	0.548844	0.838913
Bacteria	Deinococcota	Deinococci	Deinococcales	Trueperaceae		Fe	-0.116521	0.375289	0.741424
Bacteria	Dependentiae	Babeliae	Babeliales	Babeliaceae		Fe	0.184179	0.158919	0.52059
Bacteria	Firmicutes	Bacilli	Bacillales	Anoxybacillaceae		Fe	-0.169144	0.196373	0.560952
[truncated: 3,578 more rows]

## Sheet: Supplementary Table 3
Supplementary Table 3. Spearman correlation coefficients, raw P values, and Benjamini Hochberg adjusted P values for significant associations between soil microbiome alpha diversity indices (e.g. Shannon diversity, species evenness, and species richness) and nutrient uptake in sorghum roots.
AlpShannon diversitya diversity	Nutrient	Spearman correlation coefficient	P value	The BH adjusted P
Shannon diversity	Al	-0.0316755	0.809723	0.810707
Shannon diversity	Ca	0.264907	0.0411068	0.0616603
Shannon diversity	Fe	0.0546819	0.677428	0.93548
Shannon diversity	K	0.269575	0.0375725	0.0563588
Shannon diversity	Mg	0.357599	0.0052647	0.00789705
Shannon diversity	P	0.478244	0.000134117	0.000392819
Shannon diversity	S	0.544651	9.69e-06	2.35e-05
Shannon diversity	Zn	0.191831	0.141761	0.290189
Species evenness	Al	0.0315088	0.810707	0.810707
Species evenness	Ca	0.192387	0.140594	0.140594
Species evenness	Fe	0.0106696	0.93548	0.93548
Species evenness	K	0.362601	0.00463167	0.013895
Species evenness	Mg	0.376827	0.00318384	0.00789705
Species evenness	P	0.459128	0.000261879	0.000392819
Species evenness	S	0.411837	0.00118177	0.00118177
Species evenness	Zn	0.170047	0.19346	0.290189
Species richness	Al	-0.0439823	0.738621	0.810707
Species richness	Ca	0.31516	0.0141778	0.0425334
Species richness	Fe	0.20551	0.115198	0.345593
Species richness	K	-0.0556869	0.672585	0.672585
Species richness	Mg	0.132308	0.313581	0.313581
Species richness	P	0.291529	0.0238208	0.0238208
Species richness	S	0.526259	1.57e-05	2.35e-05
Species richness	Zn	0.109094	0.406684	0.406684

## Sheet: Supplementary Table 4
Supplementary Table 4. Differential abundance analysis of soil microbial KEGG pathways predicted by PICRUSt2, highlighting pathways with significant variation (BH-adjusted P value < 0.05) and providing detailed annotations. Annotations include top-level classifications that broadly categorize microbial pathways, second-level classifications that refine these categories, and third-level annotation…
KEGG Orthology (KO) Identifier	Comparison	Log Fold Change	Log Counts Per Million	The BH adjusted P value of Wilcoxon test	Level 1 annotation	Level 2 annotation	Level 3 annotation
ko00062	Control vs EBPR	1.2834	1.49413	3.98283e-05	Metabolism	Lipid metabolism	Fatty acid elongation
ko00196	Control vs EBPR	-1.54129	3.96907	1.92346e-07	Metabolism	Energy metabolism	Photosynthesis - antenna proteins
ko00232	Control vs EBPR	-1.25813	6.47224	2.36858e-05	Metabolism	Biosynthesis of other secondary metabolites	Caffeine metabolism
ko00513	Control vs EBPR	2.53052	-0.591567	4.59994e-11	Metabolism	Glycan biosynthesis and metabolism	Various types of N-glycan biosynthesis
ko00522	Control vs EBPR	-2.28962	5.00948	5.07194e-15	Metabolism	Metabolism of terpenoids and polyketides	Biosynthesis of 12-, 14- and 16-membered macrolides
ko00563	Control vs EBPR	1.24194	-2.01226	0.0125337	Metabolism	Glycan biosynthesis and metabolism	Glycosylphosphatidylinositol (GPI)-anchor biosynthesis
ko00901	Control vs EBPR	0.820336	4.32202	0.0136267	Metabolism	Biosynthesis of other secondary metabolites	Indole alkaloid biosynthesis
ko00905	Control vs EBPR	2.75303	-0.37885	6.24998e-14	Metabolism	Metabolism of terpenoids and polyketides	Brassinosteroid biosynthesis
ko00909	Control vs EBPR	-1.43602	7.2383	1.21741e-06	Metabolism	Metabolism of terpenoids and polyketides	Sesquiterpenoid and triterpenoid biosynthesis
ko01056	Control vs EBPR	-1.84023	8.43336	2.6139e-10	Metabolism	Metabolism of terpenoids and polyketides	Biosynthesis of type II polyketide backbone
ko03015	Control vs EBPR	0.995617	0.728835	0.00412627	Genetic Information Processing	Translation	mRNA surveillance pathway
ko03022	Control vs EBPR	2.34825	0.758131	2.27195e-12	Genetic Information Processing	Transcription	Basal transcription factors
ko03040	Control vs EBPR	4.98986	-1.51141	5.42444e-22	Genetic Information Processing	Transcription	Spliceosome
ko04012	Control vs EBPR	-1.63162	2.65391	4.88802e-08	Environmental Information Processing	Signal transduction	ErbB signaling pathway
ko04020	Control vs EBPR	-1.05329	3.49901	0.000672734	Environmental Information Processing	Signal transduction	Calcium signaling pathway
ko04080	Control vs EBPR	-2.95343	2.15408	2.45814e-21	Environmental Information Processing	Signaling molecules and interaction	Neuroactive ligand-receptor interaction
ko04110	Control vs EBPR	3.5882	-0.942007	5.46235e-16	Cellular Processes	Cell growth and death	Cell cycle
ko04111	Control vs EBPR	-7.05379	-1.46746	1.15262e-23	Cellular Processes	Cell growth and death	Cell cycle - yeast
ko04120	Control vs EBPR	-2.44092	2.22073	5.46235e-16	Genetic Information Processing	Folding, sorting and degradation	Ubiquitin mediated proteolysis
ko04145	Control vs EBPR	1.71732	-0.280394	1.89879e-06	Cellular Processes	Transport and catabolism	Phagosome
ko04150	Control vs EBPR	3.5882	-0.942007	5.46235e-16	Environmental Information Processing	Signal transduction	mTOR signaling pathway
ko04270	Control vs EBPR	3.15377	-3.53542	0.0292545	Organismal Systems	Circulatory system	Vascular smooth muscle contraction
ko04310	Control vs EBPR	1.46473	4.16175	8.79179e-07	Environmental Information Processing	Signal transduction	Wnt signaling pathway
ko04330	Control vs EBPR	1.7586	3.99834	2.20711e-09	Environmental Information Processing	Signal transduction	Notch signaling pathway
ko04350	Control vs EBPR	-7.05379	-1.46746	1.15262e-23	Environmental Information Processing	Signal transduction	TGF-beta signaling pathway
ko04360	Control vs EBPR	-2.44092	2.22073	5.46235e-16	Organismal Systems	Development and regeneration	Axon guidance
ko04380	Control vs EBPR	-1.58623	-2.30312	0.00243446	Organismal Systems	Development and regeneration	Osteoclast differentiation
ko04510	Control vs EBPR	-2.15097	2.59456	5.19877e-13	Cellular Processes	Cellular community - eukaryotes	Focal adhesion
ko04512	Control vs EBPR	-1.44826	2.96198	1.46489e-06	Environmental Information Processing	Signaling molecules and interaction	ECM-receptor interaction
ko04514	Control vs EBPR	-1.44321	2.93745	1.57604e-06	Environmental Information Processing	Signaling molecules and interaction	Cell adhesion molecules
ko04530	Control vs EBPR	-7.05379	-1.46746	1.15262e-23	Cellular Processes	Cellular community - eukaryotes	Tight junction
ko04614	Control vs EBPR	1.30703	6.72361	1.04919e-05	Organismal Systems	Endocrine system	Renin-angiotensin system
ko04660	Control vs EBPR	-2.44092	2.22073	5.46235e-16	Organismal Systems	Immune system	T cell receptor signaling pathway
ko04730	Control vs EBPR	-7.05379	-1.46746	1.15262e-23	Organismal Systems	Nervous system	Long-term depression
ko04810	Control vs EBPR	-2.13454	2.59892	7.64467e-13	Cellular Processes	Cell motility	Regulation of actin cytoskeleton
ko04960	Control vs EBPR	3.52361	-3.46787	0.00922517	Organismal Systems	Excretory system	Aldosterone-regulated sodium reabsorption
ko04970	Control vs EBPR	-2.79177	-0.797124	2.86929e-16	Organismal Systems	Digestive system	Salivary secretion
ko04972	Control vs EBPR	-2.90979	2.1586	5.8064e-21	Organismal Systems	Digestive system	Pancreatic secretion
ko04973	Control vs EBPR	-1.36609	7.09122	3.87162e-06	Organismal Systems	Digestive system	Carbohydrate digestion and absorption
ko04976	Control vs EBPR	-1.3172	5.53746	9.32113e-06	Organismal Systems	Digestive system	Bile secretion
ko05142	Control vs EBPR	1.07403	7.80373	0.000452158	Human Diseases	Infectious disease: parasitic	Chagas disease
ko05143	Control vs EBPR	1.28295	7.85235	1.54302e-05	Human Diseases	Infectious disease: parasitic	African trypanosomiasis
ko05144	Control vs EBPR	-1.45621	2.68315	1.46489e-06	Human Diseases	Infectious disease: parasitic	Malaria
ko05220	Control vs EBPR	1.7586	3.99834	2.20711e-09	Human Diseases	Cancer: specific types	Chronic myeloid leukemia
ko05410	Control vs EBPR	0.749206	5.66917	0.0292545	Human Diseases	Cardiovascular disease	Hypertrophic cardiomyopathy
ko05412	Control vs EBPR	-1.42923	0.520356	9.32113e-06	Human Diseases	Cardiovascular disease	Arrhythmogenic right ventricular cardiomyopathy
ko05414	Control vs EBPR	-1.13113	1.12156	0.000488989	Human Diseases	Cardiovascular disease	Dilated cardiomyopathy
ko00062	Control vs Vermont	1.47518	1.61693	3.45434e-07	Metabolism	Lipid metabolism	Fatty acid elongation
ko00196	Control vs Vermont	-1.62675	3.93779	4.32531e-09	Metabolism	Energy metabolism	Photosynthesis - antenna proteins
ko00331	Control vs Vermont	-4.81905	-3.18842	1.93871e-07	Metabolism	Biosynthesis of other secondary metabolites	Clavulanic acid biosynthesis
ko00513	Control vs Vermont	3.74209	0.379368	2.36219e-27	Metabolism	Glycan biosynthesis and metabolism	Various types of N-glycan biosynthesis
ko00522	Control vs Vermont	1.72477	6.83511	3.22906e-10	Metabolism	Metabolism of terpenoids and polyketides	Biosynthesis of 12-, 14- and 16-membered macrolides
ko00905	Control vs Vermont	-1.95315	-2.59657	0.000144768	Metabolism	Metabolism of terpenoids and polyketides	Brassinosteroid biosynthesis
ko01056	Control vs Vermont	1.04551	9.68482	0.000334592	Metabolism	Metabolism of terpenoids and polyketides	Biosynthesis of type II polyketide backbone
ko01057	Control vs Vermont	-1.10931	-0.40213	0.00081709	Metabolism	Metabolism of terpenoids and polyketides	Biosynthesis of type II polyketide products
ko02040	Control vs Vermont	-0.723719	12.9661	0.027103	Cellular Processes	Cell motility	Flagellar assembly
ko03015	Control vs Vermont	2.17091	1.56894	6.86227e-14	Genetic Information Processing	Translation	mRNA surveillance pathway
ko03022	Control vs Vermont	4.70731	2.83464	7.88355e-49	Genetic Information Processing	Transcription	Basal transcription factors
ko03040	Control vs Vermont	5.42927	-1.15283	3.2695e-29	Genetic Information Processing	Transcription	Spliceosome
ko04012	Control vs Vermont	-1.46277	2.68246	1.98443e-07	Environmental Information Processing	Signal transduction	ErbB signaling pathway
ko04020	Control vs Vermont	-1.60273	3.32936	7.51176e-09	Environmental Information Processing	Signal transduction	Calcium signaling pathway
ko04062	Control vs Vermont	6.56826	-2.02011	1.82731e-20	Organismal Systems	Immune system	Chemokine signaling pathway
ko04110	Control vs Vermont	5.01787	0.255721	9.75481e-37	Cellular Processes	Cell growth and death	Cell cycle
ko04120	Control vs Vermont	-1.82062	2.32065	1.0876e-10	Genetic Information Processing	Folding, sorting and degradation	Ubiquitin mediated proteolysis
ko04144	Control vs Vermont	-1.17756	1.17795	7.9849e-05	Cellular Processes	Transport and catabolism	Endocytosis
ko04145	Control vs Vermont	3.60003	1.23091	6.65926e-30	Cellular Processes	Transport and catabolism	Phagosome
ko04150	Control vs Vermont	5.00827	0.247049	9.75481e-37	Environmental Information Processing	Signal transduction	mTOR signaling pathway
ko04270	Control vs Vermont	3.60932	-3.57379	0.00334556	Organismal Systems	Circulatory system	Vascular smooth muscle contraction
ko04310	Control vs Vermont	-0.686048	2.9362	0.0460331	Environmental Information Processing	Signal transduction	Wnt signaling pathway
ko04330	Control vs Vermont	-0.759696	2.52526	0.0206619	Environmental Information Processing	Signal transduction	Notch signaling pathway
ko04360	Control vs Vermont	-1.82062	2.32065	1.0876e-10	Organismal Systems	Development and regeneration	Axon guidance
ko04520	Control vs Vermont	6.56826	-2.02011	1.82731e-20	Cellular Processes	Cellular community - eukaryotes	Adherens junction
ko04540	Control vs Vermont	3.9464	-3.45975	0.000206551	Cellular Processes	Cellular community - eukaryotes	Gap junction
ko04614	Control vs Vermont	-0.983398	5.50377	0.000896889	Organismal Systems	Endocrine system	Renin-angiotensin system
ko04660	Control vs Vermont	-1.82062	2.32065	1.0876e-10	Organismal Systems	Immune system	T cell receptor signaling pathway
ko04666	Control vs Vermont	-0.829866	1.2946	0.0114778	Organismal Systems	Immune system	Fc gamma R-mediated phagocytosis
ko04912	Control vs Vermont	-0.876399	1.88328	0.00517126	Organismal Systems	Endocrine system	GnRH signaling pathway
ko04976	Control vs Vermont	1.47082	6.95407	1.08525e-07	Organismal Systems	Digestive system	Bile secretion
ko05020	Control vs Vermont	-0.943143	6.7727	0.00160421	Human Diseases	Neurodegenerative disease	Prion disease
ko05130	Control vs Vermont	6.77824	-1.85958	1.51572e-22	Human Diseases	Infectious disease: bacterial	Pathogenic Escherichia coli infection
ko05144	Control vs Vermont	-0.914982	2.83336	0.0029624	Human Diseases	Infectious disease: parasitic	Malaria
ko05150	Control vs Vermont	-0.769478	7.05663	0.0164845	Human Diseases	Infectious disease: bacterial	Staphylococcus aureus infection
ko05160	Control vs Vermont	1.97606	0.732185	4.01691e-11	Human Diseases	Infectious disease: viral	Hepatitis C
ko05212	Control vs Vermont	4.65182	-0.0789729	1.03251e-31	Human Diseases	Cancer: specific types	Pancreatic cancer
ko05220	Control vs Vermont	-0.759696	2.52526	0.0206619	Human Diseases	Cancer: specific types	Chronic myeloid leukemia
ko05412	Control vs Vermont	2.11353	2.41546	6.86227e-14	Human Diseases	Cardiovascular disease	Arrhythmogenic right ventricular cardiomyopathy
ko05414	Control vs Vermont	1.75315	2.66533	3.84084e-10	Human Diseases	Cardiovascular disease	Dilated cardiomyopathy
ko00062	Control vs AMF	1.40983	1.5868	5.59379e-05	Metabolism	Lipid metabolism	Fatty acid elongation
ko00196	Control vs AMF	-1.54821	3.97143	5.77636e-06	Metabolism	Energy metabolism	Photosynthesis - antenna proteins
ko00331	Control vs AMF	1.89997	-1.62483	3.74729e-05	Metabolism	Biosynthesis of other secondary metabolites	Clavulanic acid biosynthesis
ko00513	Control vs AMF	3.30781	0.0395341	3.5464e-16	Metabolism	Glycan biosynthesis and metabolism	Various types of N-glycan biosynthesis
ko00522	Control vs AMF	-1.49394	5.18754	9.58228e-06	Metabolism	Metabolism of terpenoids and polyketides	Biosynthesis of 12-, 14- and 16-membered macrolides
ko00563	Control vs AMF	1.82875	-1.66825	8.6149e-05	Metabolism	Glycan biosynthesis and metabolism	Glycosylphosphatidylinositol (GPI)-anchor biosynthesis
ko00902	Control vs AMF	-0.990936	2.28769	0.00849975	Metabolism	Metabolism of terpenoids and polyketides	Monoterpenoid biosynthesis
ko03015	Control vs AMF	1.6918	1.21293	2.39273e-06	Genetic Information Processing	Translation	mRNA surveillance pathway
ko03022	Control vs AMF	4.09429	2.31121	6.89986e-28	Genetic Information Processing	Transcription	Basal transcription factors
ko04062	Control vs AMF	4.3286	-3.08527	3.0728e-05	Organismal Systems	Immune system	Chemokine signaling pathway
ko04080	Control vs AMF	-1.84218	2.33607	6.68753e-08	Environmental Information Processing	Signaling molecules and interaction	Neuroactive ligand-receptor interaction
ko04110	Control vs AMF	4.486	-0.1778	6.24181e-23	Cellular Processes	Cell growth and death	Cell cycle
ko04111	Control vs AMF	-1.88023	-1.16471	2.77661e-05	Cellular Processes	Cell growth and death	Cell cycle - yeast
ko04114	Control vs AMF	1.17505	1.88077	0.00106302	Cellular Processes	Cell growth and death	Oocyte meiosis
ko04145	Control vs AMF	2.9183	0.672244	5.25723e-15	Cellular Processes	Transport and catabolism	Phagosome
ko04150	Control vs AMF	4.486	-0.1778	6.24181e-23	Environmental Information Processing	Signal transduction	mTOR signaling pathway
ko04310	Control vs AMF	0.975934	3.82593	0.00836242	Environmental Information Processing	Signal transduction	Wnt signaling pathway
ko04330	Control vs AMF	0.910595	3.40047	0.0161283	Environmental Information Processing	Signal transduction	Notch signaling pathway
ko04350	Control vs AMF	-1.88023	-1.16471	2.77661e-05	Environmental Information Processing	Signal transduction	TGF-beta signaling pathway
ko04370	Control vs AMF	-0.926743	1.01759	0.0197752	Environmental Information Processing	Signal transduction	VEGF signaling pathway
ko04380	Control vs AMF	-5.4643	-2.46488	8.04333e-11	Organismal Systems	Development and regeneration	Osteoclast differentiation
ko04512	Control vs AMF	-0.910974	3.13341	0.0157314	Environmental Information Processing	Signaling molecules and interaction	ECM-receptor interaction
ko04514	Control vs AMF	-0.884567	3.11637	0.0194396	Environmental Information Processing	Signaling molecules and interaction	Cell adhesion molecules
ko04520	Control vs AMF	4.3286	-3.08527	3.0728e-05	Cellular Processes	Cellular community - eukaryotes	Adherens junction
ko04530	Control vs AMF	-1.88023	-1.16471	2.77661e-05	Cellular Processes	Cellular community - eukaryotes	Tight junction
ko04712	Control vs AMF	3.74512	-1.85863	3.88511e-11	Organismal Systems	Environmental adaptation	Circadian rhythm - plant
ko04720	Control vs AMF	1.54897	1.73094	9.53e-06	Organismal Systems	Nervous system	Long-term potentiation
ko04722	Control vs AMF	1.54897	1.73094	9.53e-06	Organismal Systems	Nervous system	Neurotrophin signaling pathway
ko04730	Control vs AMF	-1.88023	-1.16471	2.77661e-05	Organismal Systems	Nervous system	Long-term depression
ko04740	Control vs AMF	1.54897	1.73094	9.53e-06	Organismal Systems	Sensory system	Olfactory transduction
ko04745	Control vs AMF	1.54897	1.73094	9.53e-06	Organismal Systems	Sensory system	Phototransduction - fly
ko04960	Control vs AMF	4.11052	-3.17002	0.000225195	Organismal Systems	Excretory system	Aldosterone-regulated sodium reabsorption
ko04970	Control vs AMF	-3.47307	-0.806698	1.67214e-15	Organismal Systems	Digestive system	Salivary secretion
ko04971	Control vs AMF	1.56942	1.74594	8.81847e-06	Organismal Systems	Digestive system	Gastric acid secretion
ko04972	Control vs AMF	-1.6945	2.36895	7.64296e-07	Organismal Systems	Digestive system	Pancreatic secretion
ko04976	Control vs AMF	-0.99733	5.64397	0.00626567	Organismal Systems	Digestive system	Bile secretion
ko05130	Control vs AMF	4.3286	-3.08527	3.0728e-05	Human Diseases	Infectious disease: bacterial	Pathogenic Escherichia coli infection
ko05131	Control vs AMF	-1.877	1.05947	7.79954e-08	Human Diseases	Infectious disease: bacterial	Shigellosis
ko05140	Control vs AMF	-0.926743	1.01759	0.0197752	Human Diseases	Infectious disease: parasitic	Leishmaniasis
ko05160	Control vs AMF	1.40758	0.327702	0.000128042	Human Diseases	Infectious disease: viral	Hepatitis C
ko05212	Control vs AMF	4.01217	-0.591828	6.19437e-18	Human Diseases	Cancer: specific types	Pancreatic cancer
ko05214	Control vs AMF	1.54897	1.73094	9.53e-06	Human Diseases	Cancer: specific types	Glioma
ko05220	Control vs AMF	0.910595	3.40047	0.0161283	Human Diseases	Cancer: specific types	Chronic myeloid leukemia
ko05412	Control vs AMF	-3.79513	0.198409	4.1391e-24	Human Diseases	Cardiovascular disease	Arrhythmogenic right ventricular cardiomyopathy
ko05414	Control vs AMF	-1.6455	1.00346	4.97691e-06	Human Diseases	Cardiovascular disease	Dilated cardiomyopathy
ko00062	Control vs AMF_EBPR	2.59052	2.51115	4.04003e-20	Metabolism	Lipid metabolism	Fatty acid elongation
ko00196	Control vs AMF_EBPR	-2.85605	3.73473	9.67214e-25	Metabolism	Energy metabolism	Photosynthesis - antenna proteins
ko00232	Control vs AMF_EBPR	-1.12174	6.51852	6.66536e-05	Metabolism	Biosynthesis of other secondary metabolites	Caffeine metabolism
ko00513	Control vs AMF_EBPR	4.9573	1.49503	1.51554e-46	Metabolism	Glycan biosynthesis and metabolism	Various types of N-glycan biosynthesis
ko00522	Control vs AMF_EBPR	-1.51094	5.18235	3.72244e-08	Metabolism	Metabolism of terpenoids and polyketides	Biosynthesis of 12-, 14- and 16-membered macrolides
ko00901	Control vs AMF_EBPR	0.735397	4.274	0.0210639	Metabolism	Biosynthesis of other secondary metabolites	Indole alkaloid biosynthesis
ko00905	Control vs AMF_EBPR	2.30143	-0.742509	3.88134e-10	Metabolism	Metabolism of terpenoids and polyketides	Brassinosteroid biosynthesis
ko00909	Control vs AMF_EBPR	-1.29763	7.28089	2.39439e-06	Metabolism	Metabolism of terpenoids and polyketides	Sesquiterpenoid and triterpenoid biosynthesis
ko00944	Control vs AMF_EBPR	0.814318	5.15962	0.00777434	Metabolism	Biosynthesis of other secondary metabolites	Flavone and flavonol biosynthesis
ko01056	Control vs AMF_EBPR	-1.35984	8.55802	7.3846e-07	Metabolism	Metabolism of terpenoids and polyketides	Biosynthesis of type II polyketide backbone
ko01057	Control vs AMF_EBPR	0.986221	0.601361	0.00216863	Metabolism	Metabolism of terpenoids and polyketides	Biosynthesis of type II polyketide products
ko03015	Control vs AMF_EBPR	3.30082	2.53837	7.16877e-30	Genetic Information Processing	Translation	mRNA surveillance pathway
ko03022	Control vs AMF_EBPR	4.78296	2.91006	1.08602e-50	Genetic Information Processing	Transcription	Basal transcription factors
ko04012	Control vs AMF_EBPR	-1.446	2.71075	2.45168e-07	Environmental Information Processing	Signal transduction	ErbB signaling pathway
ko04020	Control vs AMF_EBPR	-0.744639	3.61372	0.0194169	Environmental Information Processing	Signal transduction	Calcium signaling pathway
ko04080	Control vs AMF_EBPR	-3.65187	2.10429	1.40538e-33	Environmental Information Processing	Signaling molecules and interaction	Neuroactive ligand-receptor interaction
ko04110	Control vs AMF_EBPR	6.10217	1.28187	1.19864e-54	Cellular Processes	Cell growth and death	Cell cycle
ko04111	Control vs AMF_EBPR	-6.90295	-1.38541	8.23549e-24	Cellular Processes	Cell growth and death	Cell cycle - yeast
ko04120	Control vs AMF_EBPR	-2.47896	2.22728	1.09578e-18	Genetic Information Processing	Folding, sorting and degradation	Ubiquitin mediated proteolysis
ko04145	Control vs AMF_EBPR	3.85258	1.46258	1.40538e-33	Cellular Processes	Transport and catabolism	Phagosome
ko04150	Control vs AMF_EBPR	6.10217	1.28187	1.19864e-54	Environmental Information Processing	Signal transduction	mTOR signaling pathway
ko04310	Control vs AMF_EBPR	1.45441	4.15867	1.46616e-07	Environmental Information Processing	Signal transduction	Wnt signaling pathway
ko04330	Control vs AMF_EBPR	1.71971	3.97232	3.86763e-10	Environmental Information Processing	Signal transduction	Notch signaling pathway
ko04350	Control vs AMF_EBPR	-6.90295	-1.38541	8.23549e-24	Environmental Information Processing	Signal transduction	TGF-beta signaling pathway
ko04360	Control vs AMF_EBPR	-2.49022	2.22557	7.95215e-19	Organismal Systems	Development and regeneration	Axon guidance
ko04510	Control vs AMF_EBPR	-1.6975	2.69937	1.09429e-09	Cellular Processes	Cellular community - eukaryotes	Focal adhesion
ko04512	Control vs AMF_EBPR	-1.14257	3.05885	6.66536e-05	Environmental Information Processing	Signaling molecules and interaction	ECM-receptor interaction
ko04514	Control vs AMF_EBPR	-1.15971	3.02774	5.32363e-05	Environmental Information Processing	Signaling molecules and interaction	Cell adhesion molecules
ko04530	Control vs AMF_EBPR	-6.90295	-1.38541	8.23549e-24	Cellular Processes	Cellular community - eukaryotes	Tight junction
ko04540	Control vs AMF_EBPR	4.5029	-2.98828	1.94881e-06	Cellular Processes	Cellular community - eukaryotes	Gap junction
ko04614	Control vs AMF_EBPR	0.909166	6.45831	0.00202526	Organismal Systems	Endocrine system	Renin-angiotensin system
ko04660	Control vs AMF_EBPR	-2.49022	2.22557	7.95215e-19	Organismal Systems	Immune system	T cell receptor signaling pathway
ko04730	Control vs AMF_EBPR	-6.90295	-1.38541	8.23549e-24	Organismal Systems	Nervous system	Long-term depression
ko04810	Control vs AMF_EBPR	-1.65146	2.71147	3.13692e-09	Cellular Processes	Cell motility	Regulation of actin cytoskeleton
ko04962	Control vs AMF_EBPR	-4.66178	-2.82744	4.44211e-07	Organismal Systems	Excretory system	Vasopressin-regulated water reabsorption
ko04970	Control vs AMF_EBPR	-0.738527	-0.311695	0.0450306	Organismal Systems	Digestive system	Salivary secretion
ko04972	Control vs AMF_EBPR	-3.55928	2.111	1.47608e-32	Organismal Systems	Digestive system	Pancreatic secretion
ko04973	Control vs AMF_EBPR	-1.03441	7.19708	0.000285145	Organismal Systems	Digestive system	Carbohydrate digestion and absorption
ko04976	Control vs AMF_EBPR	-1.30703	5.54765	2.16303e-06	Organismal Systems	Digestive system	Bile secretion
ko05110	Control vs AMF_EBPR	0.749783	6.57809	0.0170993	Human Diseases	Infectious disease: bacterial	Vibrio cholerae infection
ko05130	Control vs AMF_EBPR	4.5029	-2.98828	1.94881e-06	Human Diseases	Infectious disease: bacterial	Pathogenic Escherichia coli infection
ko05131	Control vs AMF_EBPR	-0.743493	1.38197	0.0266986	Human Diseases	Infectious disease: bacterial	Shigellosis
ko05142	Control vs AMF_EBPR	0.786029	7.62055	0.0107866	Human Diseases	Infectious disease: parasitic	Chagas disease
ko05143	Control vs AMF_EBPR	0.945744	7.62741	0.00116638	Human Diseases	Infectious disease: parasitic	African trypanosomiasis
ko05144	Control vs AMF_EBPR	-1.42158	2.70231	5.23407e-07	Human Diseases	Infectious disease: parasitic	Malaria
ko05160	Control vs AMF_EBPR	2.85094	1.44582	3.3053e-22	Human Diseases	Infectious disease: viral	Hepatitis C
ko05220	Control vs AMF_EBPR	1.71971	3.97232	3.86763e-10	Human Diseases	Cancer: specific types	Chronic myeloid leukemia
ko00062	Control vs AMF_Vermont	0.944641	1.27002	0.0430105	Metabolism	Lipid metabolism	Fatty acid elongation
ko00196	Control vs AMF_Vermont	-2.61969	3.76815	1.51775e-12	Metabolism	Energy metabolism	Photosynthesis - antenna proteins
ko00331	Control vs AMF_Vermont	-4.40772	-2.82816	1.89447e-05	Metabolism	Biosynthesis of other secondary metabolites	Clavulanic acid biosynthesis
ko00513	Control vs AMF_Vermont	1.66598	-1.17731	0.00154136	Metabolism	Glycan biosynthesis and metabolism	Various types of N-glycan biosynthesis
ko00514	Control vs AMF_Vermont	3.54021	-3.22284	0.00942694	Metabolism	Glycan biosynthesis and metabolism	Other types of O-glycan biosynthesis
ko00533	Control vs AMF_Vermont	3.54021	-3.22284	0.00942694	Metabolism	Glycan biosynthesis and metabolism	Glycosaminoglycan biosynthesis - keratan sulfate
ko00601	Control vs AMF_Vermont	3.54021	-3.22284	0.00942694	Metabolism	Glycan biosynthesis and metabolism	Glycosphingolipid biosynthesis - lacto and neolacto series
ko00905	Control vs AMF_Vermont	1.49793	-1.23506	0.00546383	Metabolism	Metabolism of terpenoids and polyketides	Brassinosteroid biosynthesis
ko03022	Control vs AMF_Vermont	1.65518	0.26492	0.000205362	Genetic Information Processing	Transcription	Basal transcription factors
ko03040	Control vs AMF_Vermont	4.49835	-1.81978	7.20337e-14	Genetic Information Processing	Transcription	Spliceosome
ko04062	Control vs AMF_Vermont	7.01443	-1.36889	1.46639e-20	Organismal Systems	Immune system	Chemokine signaling pathway
ko04110	Control vs AMF_Vermont	2.58959	-1.6428	1.71268e-05	Cellular Processes	Cell growth and death	Cell cycle
ko04111	Control vs AMF_Vermont	-2.02385	-1.15336	4.24525e-05	Cellular Processes	Cell growth and death	Cell cycle - yeast
ko04114	Control vs AMF_Vermont	-1.59068	0.645653	0.000107742	Cellular Processes	Cell growth and death	Oocyte meiosis
ko04150	Control vs AMF_Vermont	2.58959	-1.6428	1.71268e-05	Environmental Information Processing	Signal transduction	mTOR signaling pathway
ko04350	Control vs AMF_Vermont	-2.02385	-1.15336	4.24525e-05	Environmental Information Processing	Signal transduction	TGF-beta signaling pathway
ko04370	Control vs AMF_Vermont	-1.36815	0.887591	0.000802435	Environmental Information Processing	Signal transduction	VEGF signaling pathway
ko04520	Control vs AMF_Vermont	7.01443	-1.36889	1.46639e-20	Cellular Processes	Cellular community - eukaryotes	Adherens junction
ko04530	Control vs AMF_Vermont	-2.02385	-1.15336	4.24525e-05	Cellular Processes	Cellular community - eukaryotes	Tight junction
ko04540	Control vs AMF_Vermont	3.29932	-3.27704	0.0283428	Cellular Processes	Cellular community - eukaryotes	Gap junction
ko04720	Control vs AMF_Vermont	-1.46839	0.277066	0.000396242	Organismal Systems	Nervous system	Long-term potentiation
ko04722	Control vs AMF_Vermont	-1.49242	0.271378	0.000326836	Organismal Systems	Nervous system	Neurotrophin signaling pathway
ko04730	Control vs AMF_Vermont	-2.02385	-1.15336	4.24525e-05	Organismal Systems	Nervous system	Long-term depression
ko04740	Control vs AMF_Vermont	-1.49242	0.271378	0.000326836	Organismal Systems	Sensory system	Olfactory transduction
ko04745	Control vs AMF_Vermont	-1.49242	0.271378	0.000326836	Organismal Systems	Sensory system	Phototransduction - fly
ko04912	Control vs AMF_Vermont	-1.02838	1.85969	0.0170755	Organismal Systems	Endocrine system	GnRH signaling pathway
ko04970	Control vs AMF_Vermont	-2.92697	-0.731266	1.15517e-10	Organismal Systems	Digestive system	Salivary secretion
ko04971	Control vs AMF_Vermont	-1.49242	0.271378	0.000326836	Organismal Systems	Digestive system	Gastric acid secretion
ko05130	Control vs AMF_Vermont	7.112	-1.28561	5.35125e-21	Human Diseases	Infectious disease: bacterial	Pathogenic Escherichia coli infection
ko05140	Control vs AMF_Vermont	-1.36815	0.887591	0.000802435	Human Diseases	Infectious disease: parasitic	Leishmaniasis
ko05214	Control vs AMF_Vermont	-1.49242	0.271378	0.000326836	Human Diseases	Cancer: specific types	Glioma
ko00100	EBPR vs Vermont	0.890846	9.31089	2.36048e-05	Metabolism	Lipid metabolism	Steroid biosynthesis
ko00120	EBPR vs Vermont	1.16231	8.4407	1.9373e-08	Metabolism	Lipid metabolism	Primary bile acid biosynthesis
ko00121	EBPR vs Vermont	-1.08246	4.59189	2.27891e-07	Metabolism	Lipid metabolism	Secondary bile acid biosynthesis
ko00140	EBPR vs Vermont	-0.511634	9.22358	0.0217424	Metabolism	Lipid metabolism	Steroid hormone biosynthesis
ko00232	EBPR vs Vermont	0.755396	6.12345	0.000398543	Metabolism	Biosynthesis of other secondary metabolites	Caffeine metabolism
ko00311	EBPR vs Vermont	0.708548	9.64885	0.000938349	Metabolism	Biosynthesis of other secondary metabolites	Penicillin and cephalosporin biosynthesis
ko00331	EBPR vs Vermont	-3.57339	-3.64989	0.00225182	Metabolism	Biosynthesis of other secondary metabolites	Clavulanic acid biosynthesis
ko00363	EBPR vs Vermont	-0.852248	10.1213	5.27518e-05	Metabolism	Xenobiotics biodegradation and metabolism	Bisphenol degradation
ko00364	EBPR vs Vermont	-0.988891	9.61818	2.21158e-06	Metabolism	Xenobiotics biodegradation and metabolism	Fluorobenzoate degradation
ko00513	EBPR vs Vermont	1.15069	0.770722	1.08386e-07	Metabolism	Glycan biosynthesis and metabolism	Various types of N-glycan biosynthesis
ko00522	EBPR vs Vermont	4.01544	6.53725	4.38436e-73	Metabolism	Metabolism of terpenoids and polyketides	Biosynthesis of 12-, 14- and 16-membered macrolides
ko00523	EBPR vs Vermont	0.700402	11.6671	0.00108476	Metabolism	Metabolism of terpenoids and polyketides	Polyketide sugar unit biosynthesis
ko00531	EBPR vs Vermont	1.16423	9.76776	1.85314e-08	Metabolism	Glycan biosynthesis and metabolism	Glycosaminoglycan degradation
ko00540	EBPR vs Vermont	-0.508831	11.8975	0.0224132	Metabolism	Glycan biosynthesis and metabolism	Lipopolysaccharide biosynthesis
ko00590	EBPR vs Vermont	-0.536589	10.3432	0.0156181	Metabolism	Lipid metabolism	Arachidonic acid metabolism
ko00591	EBPR vs Vermont	-0.646103	9.2864	0.00283521	Metabolism	Lipid metabolism	Linoleic acid metabolism
ko00603	EBPR vs Vermont	0.933356	10.187	8.91129e-06	Metabolism	Glycan biosynthesis and metabolism	Glycosphingolipid biosynthesis - globo and isoglobo series
ko00604	EBPR vs Vermont	0.859114	9.17817	4.67331e-05	Metabolism	Glycan biosynthesis and metabolism	Glycosphingolipid biosynthesis - ganglio series
ko00791	EBPR vs Vermont	-0.536269	9.5077	0.0156181	Metabolism	Xenobiotics biodegradation and metabolism	Atrazine degradation
ko00901	EBPR vs Vermont	-0.614817	4.38451	0.00510705	Metabolism	Biosynthesis of other secondary metabolites	Indole alkaloid biosynthesis
ko00905	EBPR vs Vermont	-4.70353	-0.589932	4.49686e-44	Metabolism	Metabolism of terpenoids and polyketides	Brassinosteroid biosynthesis
ko00906	EBPR vs Vermont	0.896043	10.1721	2.20294e-05	Metabolism	Metabolism of terpenoids and polyketides	Carotenoid biosynthesis
ko00909	EBPR vs Vermont	1.10013	6.98764	1.1551e-07	Metabolism	Metabolism of terpenoids and polyketides	Sesquiterpenoid and triterpenoid biosynthesis
ko00940	EBPR vs Vermont	0.711591	11.2228	0.000893248	Metabolism	Biosynthesis of other secondary metabolites	Phenylpropanoid biosynthesis
ko00941	EBPR vs Vermont	0.855081	7.62786	5.11532e-05	Metabolism	Biosynthesis of other secondary metabolites	Flavonoid biosynthesis
ko00943	EBPR vs Vermont	-1.13807	2.63106	1.01567e-07	Metabolism	Biosynthesis of other secondary metabolites	Isoflavonoid biosynthesis
ko00944	EBPR vs Vermont	-0.521004	4.82614	0.0202247	Metabolism	Biosynthesis of other secondary metabolites	Flavone and flavonol biosynthesis
ko00945	EBPR vs Vermont	0.875545	8.79499	3.29415e-05	Metabolism	Biosynthesis of other secondary metabolites	Stilbenoid, diarylheptanoid and gingerol biosynthesis
ko00980	EBPR vs Vermont	-0.653677	11.3044	0.00252084	Metabolism	Xenobiotics biodegradation and metabolism	Metabolism of xenobiotics by cytochrome P450
ko00982	EBPR vs Vermont	-0.649954	11.385	0.00266666	Metabolism	Xenobiotics biodegradation and metabolism	Drug metabolism - cytochrome P450
ko01051	EBPR vs Vermont	0.851084	10.6405	5.32309e-05	Metabolism	Metabolism of terpenoids and polyketides	Biosynthesis of ansamycins
ko01053	EBPR vs Vermont	-0.536817	7.90292	0.0156181	Metabolism	Metabolism of terpenoids and polyketides	Biosynthesis of siderophore group nonribosomal peptides
ko01055	EBPR vs Vermont	0.46537	9.67876	0.0411751	Metabolism	Metabolism of terpenoids and polyketides	Biosynthesis of vancomycin group antibiotics
ko01056	EBPR vs Vermont	2.88701	9.29412	1.72827e-42	Metabolism	Metabolism of terpenoids and polyketides	Biosynthesis of type II polyketide backbone
ko01057	EBPR vs Vermont	-1.52502	-0.139997	4.38503e-10	Metabolism	Metabolism of terpenoids and polyketides	Biosynthesis of type II polyketide products
ko02030	EBPR vs Vermont	-0.861628	12.8184	4.45508e-05	Cellular Processes	Cell motility	Bacterial chemotaxis
ko02040	EBPR vs Vermont	-0.941504	13.1041	7.37719e-06	Cellular Processes	Cell motility	Flagellar assembly
ko03015	EBPR vs Vermont	1.15225	1.80372	6.43315e-08	Genetic Information Processing	Translation	mRNA surveillance pathway
ko03022	EBPR vs Vermont	2.32869	3.0301	1.94104e-28	Genetic Information Processing	Transcription	Basal transcription factors
ko03050	EBPR vs Vermont	0.832135	9.31594	8.13909e-05	Genetic Information Processing	Folding, sorting and degradation	Proteasome
ko04020	EBPR vs Vermont	-0.548445	2.6211	0.0163204	Environmental Information Processing	Signal transduction	Calcium signaling pathway
ko04062	EBPR vs Vermont	6.55151	-2.00954	8.24532e-24	Organismal Systems	Immune system	Chemokine signaling pathway
ko04080	EBPR vs Vermont	2.8283	2.02554	4.30337e-35	Environmental Information Processing	Signaling molecules and interaction	Neuroactive ligand-receptor interaction
ko04110	EBPR vs Vermont	1.36232	0.642754	5.62188e-10	Cellular Processes	Cell growth and death	Cell cycle
ko04111	EBPR vs Vermont	6.71167	-1.86576	5.83948e-25	Cellular Processes	Cell growth and death	Cell cycle - yeast
ko04115	EBPR vs Vermont	-0.803508	8.7414	0.00014329	Cellular Processes	Cell growth and death	p53 signaling pathway
ko04120	EBPR vs Vermont	0.616091	0.895655	0.00801346	Genetic Information Processing	Folding, sorting and degradation	Ubiquitin mediated proteolysis
ko04142	EBPR vs Vermont	0.485976	10.4356	0.0312085	Cellular Processes	Transport and catabolism	Lysosome
ko04144	EBPR vs Vermont	-0.9512	1.0361	3.19585e-05	Cellular Processes	Transport and catabolism	Endocytosis
ko04145	EBPR vs Vermont	1.84362	1.45332	1.36311e-17	Cellular Processes	Transport and catabolism	Phagosome
ko04150	EBPR vs Vermont	1.35275	0.636158	7.13035e-10	Environmental Information Processing	Signal transduction	mTOR signaling pathway
ko04210	EBPR vs Vermont	-0.769956	8.89502	0.000288425	Cellular Processes	Cell growth and death	Apoptosis
ko04260	EBPR vs Vermont	-0.75493	9.10392	0.000390401	Organismal Systems	Circulatory system	Cardiac muscle contraction
ko04310	EBPR vs Vermont	-2.15181	3.99191	4.93315e-25	Environmental Information Processing	Signal transduction	Wnt signaling pathway
ko04320	EBPR vs Vermont	-3.36607	-3.71541	0.0132752	Organismal Systems	Development and regeneration	Dorso-ventral axis formation
ko04330	EBPR vs Vermont	-2.51935	3.83943	5.60451e-33	Environmental Information Processing	Signal transduction	Notch signaling pathway
ko04350	EBPR vs Vermont	6.71167	-1.86576	5.83948e-25	Environmental Information Processing	Signal transduction	TGF-beta signaling pathway
ko04360	EBPR vs Vermont	0.616091	0.895655	0.00801346	Organismal Systems	Development and regeneration	Axon guidance
ko04370	EBPR vs Vermont	-0.940526	1.64653	2.28832e-05	Environmental Information Processing	Signal transduction	VEGF signaling pathway
ko04380	EBPR vs Vermont	2.37134	-1.86953	4.569e-10	Organismal Systems	Development and regeneration	Osteoclast differentiation
ko04510	EBPR vs Vermont	2.30468	2.71174	9.73041e-27	Cellular Processes	Cellular community - eukaryotes	Focal adhesion
ko04512	EBPR vs Vermont	1.71668	3.14596	3.5123e-16	Environmental Information Processing	Signaling molecules and interaction	ECM-receptor interaction
ko04514	EBPR vs Vermont	1.70191	3.11357	6.45337e-16	Environmental Information Processing	Signaling molecules and interaction	Cell adhesion molecules
ko04520	EBPR vs Vermont	6.55151	-2.00954	8.24532e-24	Cellular Processes	Cellular community - eukaryotes	Adherens junction
ko04530	EBPR vs Vermont	6.71167	-1.86576	5.83948e-25	Cellular Processes	Cellular community - eukaryotes	Tight junction
ko04540	EBPR vs Vermont	2.05969	-3.38317	0.00720084	Cellular Processes	Cellular community - eukaryotes	Gap junction
ko04614	EBPR vs Vermont	-2.29061	6.48812	2.22699e-28	Organismal Systems	Endocrine system	Renin-angiotensin system
ko04622	EBPR vs Vermont	-0.617722	5.06356	0.00477814	Organismal Systems	Immune system	RIG-I-like receptor signaling pathway
ko04640	EBPR vs Vermont	-0.763997	1.52257	0.000815279	Organismal Systems	Immune system	Hematopoietic cell lineage
ko04660	EBPR vs Vermont	0.616091	0.895655	0.00801346	Organismal Systems	Immune system	T cell receptor signaling pathway
ko04666	EBPR vs Vermont	-0.607549	1.16382	0.0127003	Organismal Systems	Immune system	Fc gamma R-mediated phagocytosis
ko04730	EBPR vs Vermont	6.71167	-1.86576	5.83948e-25	Organismal Systems	Nervous system	Long-term depression
ko04810	EBPR vs Vermont	2.33701	2.75597	1.90499e-27	Cellular Processes	Cell motility	Regulation of actin cytoskeleton
ko04912	EBPR vs Vermont	-0.706246	1.78162	0.0017987	Organismal Systems	Endocrine system	GnRH signaling pathway
ko04920	EBPR vs Vermont	0.450732	11.1774	0.0499648	Organismal Systems	Endocrine system	Adipocytokine signaling pathway
ko04970	EBPR vs Vermont	2.51669	-0.911251	2.29994e-21	Organismal Systems	Digestive system	Salivary secretion
ko04972	EBPR vs Vermont	2.78602	2.03497	1.71382e-34	Organismal Systems	Digestive system	Pancreatic secretion
ko04973	EBPR vs Vermont	1.75271	7.36625	1.12339e-17	Organismal Systems	Digestive system	Carbohydrate digestion and absorption
ko04974	EBPR vs Vermont	0.669833	8.16647	0.0019259	Organismal Systems	Digestive system	Protein digestion and absorption
ko04976	EBPR vs Vermont	2.78739	6.70159	7.08822e-40	Organismal Systems	Digestive system	Bile secretion
ko05012	EBPR vs Vermont	-0.778998	9.93638	0.000240264	Human Diseases	Neurodegenerative disease	Parkinson disease
ko05016	EBPR vs Vermont	-0.74437	10.6122	0.000471122	Human Diseases	Neurodegenerative disease	Huntington disease
ko05020	EBPR vs Vermont	-1.05436	6.84511	3.94873e-07	Human Diseases	Neurodegenerative disease	Prion disease
ko05110	EBPR vs Vermont	-0.645814	6.19548	0.00289609	Human Diseases	Infectious disease: bacterial	Vibrio cholerae infection
ko05130	EBPR vs Vermont	4.87492	-1.81992	3.93501e-23	Human Diseases	Infectious disease: bacterial	Pathogenic Escherichia coli infection
ko05140	EBPR vs Vermont	-0.940526	1.64653	2.28832e-05	Human Diseases	Infectious disease: parasitic	Leishmaniasis
ko05142	EBPR vs Vermont	-1.6494	7.6285	6.92595e-16	Human Diseases	Infectious disease: parasitic	Chagas disease
ko05143	EBPR vs Vermont	-1.92466	7.67925	5.66482e-21	Human Diseases	Infectious disease: parasitic	African trypanosomiasis
ko05144	EBPR vs Vermont	0.549053	2.06562	0.0208916	Human Diseases	Infectious disease: parasitic	Malaria
ko05145	EBPR vs Vermont	-0.809957	8.73635	0.000126096	Human Diseases	Infectious disease: parasitic	Toxoplasmosis
ko05146	EBPR vs Vermont	0.469994	8.05649	0.0390842	Human Diseases	Infectious disease: parasitic	Amoebiasis
ko05150	EBPR vs Vermont	-0.564627	6.92841	0.0105653	Human Diseases	Infectious disease: bacterial	Staphylococcus aureus infection
ko05160	EBPR vs Vermont	1.59308	0.807857	3.5182e-13	Human Diseases	Infectious disease: viral	Hepatitis C
ko05210	EBPR vs Vermont	-0.809996	8.73531	0.000126096	Human Diseases	Cancer: specific types	Colorectal cancer
ko05212	EBPR vs Vermont	4.12344	-0.0636801	1.04123e-43	Human Diseases	Cancer: specific types	Pancreatic cancer
ko05220	EBPR vs Vermont	-2.51935	3.83943	5.60451e-33	Human Diseases	Cancer: specific types	Chronic myeloid leukemia
ko05222	EBPR vs Vermont	-0.811	8.74565	0.000126096	Human Diseases	Cancer: specific types	Small cell lung cancer
ko05340	EBPR vs Vermont	0.641972	10.1631	0.00297929	Human Diseases	Immune disease	Primary immunodeficiency
ko05410	EBPR vs Vermont	-1.06049	5.54669	3.6654e-07	Human Diseases	Cardiovascular disease	Hypertrophic cardiomyopathy
ko05412	EBPR vs Vermont	3.54572	2.24318	2.66763e-51	Human Diseases	Cardiovascular disease	Arrhythmogenic right ventricular cardiomyopathy
ko05414	EBPR vs Vermont	2.88683	2.48117	4.00726e-38	Human Diseases	Cardiovascular disease	Dilated cardiomyopathy
ko05416	EBPR vs Vermont	-0.809996	8.73531	0.000126096	Human Diseases	Cardiovascular disease	Viral myocarditis
ko00232	EBPR vs AMF	0.932277	6.25351	0.00135426	Metabolism	Biosynthesis of other secondary metabolites	Caffeine metabolism
ko00331	EBPR vs AMF	3.12551	-1.78074	2.139e-11	Metabolism	Biosynthesis of other secondary metabolites	Clavulanic acid biosynthesis
ko00513	EBPR vs AMF	0.786613	0.52172	0.0133146	Metabolism	Glycan biosynthesis and metabolism	Various types of N-glycan biosynthesis
ko00522	EBPR vs AMF	0.797442	3.91045	0.00889738	Metabolism	Metabolism of terpenoids and polyketides	Biosynthesis of 12-, 14- and 16-membered macrolides
ko00902	EBPR vs AMF	-0.832219	2.18154	0.00805647	Metabolism	Metabolism of terpenoids and polyketides	Monoterpenoid biosynthesis
ko00905	EBPR vs AMF	-3.78589	-0.437463	7.65922e-23	Metabolism	Metabolism of terpenoids and polyketides	Brassinosteroid biosynthesis
ko00909	EBPR vs AMF	1.14166	7.03228	4.82014e-05	Metabolism	Metabolism of terpenoids and polyketides	Sesquiterpenoid and triterpenoid biosynthesis
ko01056	EBPR vs AMF	1.11847	7.90592	7.04146e-05	Metabolism	Metabolism of terpenoids and polyketides	Biosynthesis of type II polyketide backbone
ko01057	EBPR vs AMF	-0.895082	0.127266	0.0132602	Metabolism	Metabolism of terpenoids and polyketides	Biosynthesis of type II polyketide products
ko03015	EBPR vs AMF	0.690169	1.50521	0.0333868	Genetic Information Processing	Translation	mRNA surveillance pathway
ko03022	EBPR vs AMF	1.77356	2.58263	1.88039e-10	Genetic Information Processing	Transcription	Basal transcription factors
ko03040	EBPR vs AMF	-6.92547	-1.47023	8.62894e-23	Genetic Information Processing	Transcription	Spliceosome
ko04012	EBPR vs AMF	1.98878	2.93022	1.31451e-12	Environmental Information Processing	Signal transduction	ErbB signaling pathway
ko04020	EBPR vs AMF	1.31943	3.68573	2.16614e-06	Environmental Information Processing	Signal transduction	Calcium signaling pathway
ko04062	EBPR vs AMF	4.32125	-3.09026	1.84383e-05	Organismal Systems	Immune system	Chemokine signaling pathway
ko04080	EBPR vs AMF	1.12374	0.732343	0.00048388	Environmental Information Processing	Signaling molecules and interaction	Neuroactive ligand-receptor interaction
ko04110	EBPR vs AMF	0.9156	0.328789	0.00348179	Cellular Processes	Cell growth and death	Cell cycle
ko04111	EBPR vs AMF	5.04413	-2.77162	1.12392e-08	Cellular Processes	Cell growth and death	Cell cycle - yeast
ko04114	EBPR vs AMF	1.59281	1.76303	2.83396e-08	Cellular Processes	Cell growth and death	Oocyte meiosis
ko04120	EBPR vs AMF	2.33967	2.13583	1.99006e-16	Genetic Information Processing	Folding, sorting and degradation	Ubiquitin mediated proteolysis
ko04145	EBPR vs AMF	1.21434	0.986277	3.59557e-05	Cellular Processes	Transport and catabolism	Phagosome
ko04150	EBPR vs AMF	0.9156	0.328789	0.00348179	Environmental Information Processing	Signal transduction	mTOR signaling pathway
ko04270	EBPR vs AMF	-3.06378	-3.43152	0.0449734	Organismal Systems	Circulatory system	Vascular smooth muscle contraction
ko04320	EBPR vs AMF	-3.07463	-3.45103	0.0449734	Organismal Systems	Development and regeneration	Dorso-ventral axis formation
ko04330	EBPR vs AMF	-0.849461	4.26568	0.00452872	Environmental Information Processing	Signal transduction	Notch signaling pathway
ko04350	EBPR vs AMF	5.04413	-2.77162	1.12392e-08	Environmental Information Processing	Signal transduction	TGF-beta signaling pathway
ko04360	EBPR vs AMF	2.33967	2.13583	1.99006e-16	Organismal Systems	Development and regeneration	Axon guidance
ko04370	EBPR vs AMF	-1.61635	1.48811	3.75679e-08	Environmental Information Processing	Signal transduction	VEGF signaling pathway
ko04380	EBPR vs AMF	-3.87587	-3.20692	0.00049815	Organismal Systems	Development and regeneration	Osteoclast differentiation
ko04510	EBPR vs AMF	1.73934	2.27262	8.45568e-10	Cellular Processes	Cellular community - eukaryotes	Focal adhesion
ko04520	EBPR vs AMF	4.32125	-3.09026	1.84383e-05	Cellular Processes	Cellular community - eukaryotes	Adherens junction
ko04530	EBPR vs AMF	5.04413	-2.77162	1.12392e-08	Cellular Processes	Cellular community - eukaryotes	Tight junction
ko04614	EBPR vs AMF	-0.817006	6.88646	0.0063637	Organismal Systems	Endocrine system	Renin-angiotensin system
ko04640	EBPR vs AMF	-0.742483	1.56625	0.0305728	Organismal Systems	Immune system	Hematopoietic cell lineage
ko04660	EBPR vs AMF	2.33967	2.13583	1.99006e-16	Organismal Systems	Immune system	T cell receptor signaling pathway
ko04712	EBPR vs AMF	6.39021	-1.95898	1.15144e-18	Organismal Systems	Environmental adaptation	Circadian rhythm - plant
ko04720	EBPR vs AMF	1.54567	1.72862	5.67373e-08	Organismal Systems	Nervous system	Long-term potentiation
ko04722	EBPR vs AMF	1.56798	1.72294	3.75679e-08	Organismal Systems	Nervous system	Neurotrophin signaling pathway
ko04730	EBPR vs AMF	5.04413	-2.77162	1.12392e-08	Organismal Systems	Nervous system	Long-term depression
ko04740	EBPR vs AMF	1.56798	1.72294	3.75679e-08	Organismal Systems	Sensory system	Olfactory transduction
ko04745	EBPR vs AMF	1.56798	1.72294	3.75679e-08	Organismal Systems	Sensory system	Phototransduction - fly
ko04810	EBPR vs AMF	1.74514	2.29456	7.91961e-10	Cellular Processes	Cell motility	Regulation of actin cytoskeleton
ko04912	EBPR vs AMF	0.75019	2.52633	0.0161535	Organismal Systems	Endocrine system	GnRH signaling pathway
ko04971	EBPR vs AMF	1.56427	1.7438	3.75679e-08	Organismal Systems	Digestive system	Gastric acid secretion
ko04972	EBPR vs AMF	1.22664	0.843203	8.39486e-05	Organismal Systems	Digestive system	Pancreatic secretion
ko04973	EBPR vs AMF	0.90714	6.77919	0.00192246	Organismal Systems	Digestive system	Carbohydrate digestion and absorption
ko05130	EBPR vs AMF	2.62556	-3.02358	0.000817856	Human Diseases	Infectious disease: bacterial	Pathogenic Escherichia coli infection
ko05131	EBPR vs AMF	-1.47969	0.767854	3.88471e-07	Human Diseases	Infectious disease: bacterial	Shigellosis
ko05140	EBPR vs AMF	-1.61635	1.48811	3.75679e-08	Human Diseases	Infectious disease: parasitic	Leishmaniasis
ko05143	EBPR vs AMF	-0.995245	7.94599	0.000524465	Human Diseases	Infectious disease: parasitic	African trypanosomiasis
ko05144	EBPR vs AMF	0.805807	2.24426	0.0114126	Human Diseases	Infectious disease: parasitic	Malaria
ko05160	EBPR vs AMF	1.05527	0.415415	0.000533359	Human Diseases	Infectious disease: viral	Hepatitis C
ko05212	EBPR vs AMF	3.55171	-0.590308	1.70754e-22	Human Diseases	Cancer: specific types	Pancreatic cancer
ko05214	EBPR vs AMF	1.56798	1.72294	3.75679e-08	Human Diseases	Cancer: specific types	Glioma
ko05220	EBPR vs AMF	-0.849461	4.26568	0.00452872	Human Diseases	Cancer: specific types	Chronic myeloid leukemia
ko05412	EBPR vs AMF	-2.28148	-0.97186	2.8926e-12	Human Diseases	Cardiovascular disease	Arrhythmogenic right ventricular cardiomyopathy
ko00062	EBPR vs AMF_EBPR	1.29485	2.77533	3.63493e-09	Metabolism	Lipid metabolism	Fatty acid elongation
ko00196	EBPR vs AMF_EBPR	-1.31787	2.51302	1.66577e-09	Metabolism	Energy metabolism	Photosynthesis - antenna proteins
ko00331	EBPR vs AMF_EBPR	2.27357	-2.29699	3.06232e-05	Metabolism	Biosynthesis of other secondary metabolites	Clavulanic acid biosynthesis
ko00513	EBPR vs AMF_EBPR	2.36803	1.6817	1.50187e-26	Metabolism	Glycan biosynthesis and metabolism	Various types of N-glycan biosynthesis
ko00522	EBPR vs AMF_EBPR	0.77311	3.89626	0.00144937	Metabolism	Metabolism of terpenoids and polyketides	Biosynthesis of 12-, 14- and 16-membered macrolides
ko00943	EBPR vs AMF_EBPR	-0.847339	2.75983	0.00044899	Metabolism	Biosynthesis of other secondary metabolites	Isoflavonoid biosynthesis
ko03015	EBPR vs AMF_EBPR	2.27414	2.65627	5.03572e-26	Genetic Information Processing	Translation	mRNA surveillance pathway
ko03022	EBPR vs AMF_EBPR	2.39482	3.09267	2.17795e-28	Genetic Information Processing	Transcription	Basal transcription factors
ko03040	EBPR vs AMF_EBPR	-4.02821	-1.39578	2.34796e-21	Genetic Information Processing	Transcription	Spliceosome
ko04110	EBPR vs AMF_EBPR	2.4611	1.47886	1.27535e-27	Cellular Processes	Cell growth and death	Cell cycle
ko04145	EBPR vs AMF_EBPR	2.09455	1.64935	3.72224e-21	Cellular Processes	Transport and catabolism	Phagosome
ko04150	EBPR vs AMF_EBPR	2.4611	1.47886	1.27535e-27	Environmental Information Processing	Signal transduction	mTOR signaling pathway
ko04540	EBPR vs AMF_EBPR	2.79474	-2.94383	0.00027692	Cellular Processes	Cellular community - eukaryotes	Gap junction
ko04960	EBPR vs AMF_EBPR	-3.46142	-3.29803	0.0330463	Organismal Systems	Excretory system	Aldosterone-regulated sodium reabsorption
ko04962	EBPR vs AMF_EBPR	-3.43979	-3.2904	0.0181881	Organismal Systems	Excretory system	Vasopressin-regulated water reabsorption
ko04970	EBPR vs AMF_EBPR	1.94028	-1.33931	1.4925e-10	Organismal Systems	Digestive system	Salivary secretion
ko05130	EBPR vs AMF_EBPR	2.79474	-2.94383	0.00027692	Human Diseases	Infectious disease: bacterial	Pathogenic Escherichia coli infection
ko05160	EBPR vs AMF_EBPR	2.4611	1.47886	1.27535e-27	Human Diseases	Infectious disease: viral	Hepatitis C
ko05412	EBPR vs AMF_EBPR	1.13202	0.319654	2.86618e-05	Human Diseases	Cardiovascular disease	Arrhythmogenic right ventricular cardiomyopathy
ko00121	EBPR vs AMF_Vermont	-0.911393	4.66223	0.00838698	Metabolism	Lipid metabolism	Secondary bile acid biosynthesis
ko00196	EBPR vs AMF_Vermont	-1.07035	2.57739	0.00148739	Metabolism	Energy metabolism	Photosynthesis - antenna proteins
ko00232	EBPR vs AMF_Vermont	1.33166	6.52066	2.86192e-05	Metabolism	Biosynthesis of other secondary metabolites	Caffeine metabolism
ko00331	EBPR vs AMF_Vermont	-3.19109	-3.24261	0.0155479	Metabolism	Biosynthesis of other secondary metabolites	Clavulanic acid biosynthesis
ko00514	EBPR vs AMF_Vermont	3.55204	-3.22785	0.0093971	Metabolism	Glycan biosynthesis and metabolism	Other types of O-glycan biosynthesis
ko00522	EBPR vs AMF_Vermont	2.46292	5.14986	3.85865e-15	Metabolism	Metabolism of terpenoids and polyketides	Biosynthesis of 12-, 14- and 16-membered macrolides
ko00533	EBPR vs AMF_Vermont	3.55204	-3.22785	0.0093971	Metabolism	Glycan biosynthesis and metabolism	Glycosaminoglycan biosynthesis - keratan sulfate
ko00601	EBPR vs AMF_Vermont	3.55204	-3.22785	0.0093971	Metabolism	Glycan biosynthesis and metabolism	Glycosphingolipid biosynthesis - lacto and neolacto series
ko00905	EBPR vs AMF_Vermont	-1.22055	-0.0582185	0.000998367	Metabolism	Metabolism of terpenoids and polyketides	Brassinosteroid biosynthesis
ko00909	EBPR vs AMF_Vermont	1.39762	7.20629	1.1134e-05	Metabolism	Metabolism of terpenoids and polyketides	Sesquiterpenoid and triterpenoid biosynthesis
ko00943	EBPR vs AMF_Vermont	-0.868907	2.74133	0.0145487	Metabolism	Biosynthesis of other secondary metabolites	Isoflavonoid biosynthesis
ko01056	EBPR vs AMF_Vermont	1.97489	8.5359	2.11351e-10	Metabolism	Metabolism of terpenoids and polyketides	Biosynthesis of type II polyketide backbone
ko03015	EBPR vs AMF_Vermont	-0.782157	0.809998	0.0455015	Genetic Information Processing	Translation	mRNA surveillance pathway
ko04012	EBPR vs AMF_Vermont	1.38912	2.46916	1.97112e-05	Environmental Information Processing	Signal transduction	ErbB signaling pathway
ko04020	EBPR vs AMF_Vermont	0.882129	3.38262	0.011388	Environmental Information Processing	Signal transduction	Calcium signaling pathway
ko04062	EBPR vs AMF_Vermont	6.99736	-1.39103	1.49833e-22	Organismal Systems	Immune system	Chemokine signaling pathway
ko04080	EBPR vs AMF_Vermont	3.44257	2.57674	1.22575e-24	Environmental Information Processing	Signaling molecules and interaction	Neuroactive ligand-receptor interaction
ko04110	EBPR vs AMF_Vermont	-0.934055	-0.495594	0.0268075	Cellular Processes	Cell growth and death	Cell cycle
ko04111	EBPR vs AMF_Vermont	4.77411	-2.79898	1.06262e-06	Cellular Processes	Cell growth and death	Cell cycle - yeast
ko04114	EBPR vs AMF_Vermont	-1.16807	0.356917	0.00123481	Cellular Processes	Cell growth and death	Oocyte meiosis
ko04120	EBPR vs AMF_Vermont	2.37012	2.14869	1.56918e-13	Genetic Information Processing	Folding, sorting and degradation	Ubiquitin mediated proteolysis
ko04150	EBPR vs AMF_Vermont	-0.934055	-0.495594	0.0268075	Environmental Information Processing	Signal transduction	mTOR signaling pathway
ko04310	EBPR vs AMF_Vermont	-1.16874	4.24546	0.00030438	Environmental Information Processing	Signal transduction	Wnt signaling pathway
ko04330	EBPR vs AMF_Vermont	-1.17099	4.15365	0.00030438	Environmental Information Processing	Signal transduction	Notch signaling pathway
ko04350	EBPR vs AMF_Vermont	4.77411	-2.79898	1.06262e-06	Environmental Information Processing	Signal transduction	TGF-beta signaling pathway
ko04360	EBPR vs AMF_Vermont	2.37012	2.14869	1.56918e-13	Organismal Systems	Development and regeneration	Axon guidance
ko04370	EBPR vs AMF_Vermont	-2.05212	1.39679	5.74309e-10	Environmental Information Processing	Signal transduction	VEGF signaling pathway
ko04510	EBPR vs AMF_Vermont	2.16668	2.5973	9.22342e-12	Cellular Processes	Cellular community - eukaryotes	Focal adhesion
ko04512	EBPR vs AMF_Vermont	1.43889	2.94984	9.02708e-06	Environmental Information Processing	Signaling molecules and interaction	ECM-receptor interaction
ko04514	EBPR vs AMF_Vermont	1.44693	2.93477	8.32756e-06	Environmental Information Processing	Signaling molecules and interaction	Cell adhesion molecules
ko04520	EBPR vs AMF_Vermont	6.99736	-1.39103	1.49833e-22	Cellular Processes	Cellular community - eukaryotes	Adherens junction
ko04530	EBPR vs AMF_Vermont	4.77411	-2.79898	1.06262e-06	Cellular Processes	Cellular community - eukaryotes	Tight junction
ko04614	EBPR vs AMF_Vermont	-0.82211	6.87805	0.0182953	Organismal Systems	Endocrine system	Renin-angiotensin system
ko04660	EBPR vs AMF_Vermont	2.37012	2.14869	1.56918e-13	Organismal Systems	Immune system	T cell receptor signaling pathway
ko04720	EBPR vs AMF_Vermont	-1.468	0.279063	2.94979e-05	Organismal Systems	Nervous system	Long-term potentiation
ko04722	EBPR vs AMF_Vermont	-1.46963	0.257987	2.94979e-05	Organismal Systems	Nervous system	Neurotrophin signaling pathway
ko04730	EBPR vs AMF_Vermont	4.77411	-2.79898	1.06262e-06	Organismal Systems	Nervous system	Long-term depression
ko04740	EBPR vs AMF_Vermont	-1.46963	0.257987	2.94979e-05	Organismal Systems	Sensory system	Olfactory transduction
ko04745	EBPR vs AMF_Vermont	-1.46963	0.257987	2.94979e-05	Organismal Systems	Sensory system	Phototransduction - fly
ko04810	EBPR vs AMF_Vermont	2.24836	2.68112	1.44431e-12	Cellular Processes	Cell motility	Regulation of actin cytoskeleton
ko04912	EBPR vs AMF_Vermont	-0.852433	1.75236	0.017567	Organismal Systems	Endocrine system	GnRH signaling pathway
ko04960	EBPR vs AMF_Vermont	-3.28285	-3.24865	0.0268075	Organismal Systems	Excretory system	Aldosterone-regulated sodium reabsorption
ko04971	EBPR vs AMF_Vermont	-1.49347	0.274787	2.62532e-05	Organismal Systems	Digestive system	Gastric acid secretion
ko04972	EBPR vs AMF_Vermont	3.39926	2.58014	1.71852e-24	Organismal Systems	Digestive system	Pancreatic secretion
ko04973	EBPR vs AMF_Vermont	1.3964	7.10947	1.1134e-05	Organismal Systems	Digestive system	Carbohydrate digestion and absorption
ko04976	EBPR vs AMF_Vermont	1.21593	5.46355	0.000152959	Organismal Systems	Digestive system	Bile secretion
ko05110	EBPR vs AMF_Vermont	-0.854669	6.12895	0.014111	Human Diseases	Infectious disease: bacterial	Vibrio cholerae infection
ko05130	EBPR vs AMF_Vermont	5.50081	-1.28597	2.22768e-22	Human Diseases	Infectious disease: bacterial	Pathogenic Escherichia coli infection
ko05140	EBPR vs AMF_Vermont	-2.05212	1.39679	5.74309e-10	Human Diseases	Infectious disease: parasitic	Leishmaniasis
ko05142	EBPR vs AMF_Vermont	-0.782338	7.90136	0.0268075	Human Diseases	Infectious disease: parasitic	Chagas disease
ko05143	EBPR vs AMF_Vermont	-0.843282	7.99191	0.0152004	Human Diseases	Infectious disease: parasitic	African trypanosomiasis
ko05144	EBPR vs AMF_Vermont	1.36932	2.61523	2.75638e-05	Human Diseases	Infectious disease: parasitic	Malaria
ko05214	EBPR vs AMF_Vermont	-1.46963	0.257987	2.94979e-05	Human Diseases	Cancer: specific types	Glioma
ko05220	EBPR vs AMF_Vermont	-1.17099	4.15365	0.00030438	Human Diseases	Cancer: specific types	Chronic myeloid leukemia
ko05412	EBPR vs AMF_Vermont	1.71617	0.714112	5.78979e-07	Human Diseases	Cardiovascular disease	Arrhythmogenic right ventricular cardiomyopathy
ko05414	EBPR vs AMF_Vermont	0.976357	1.01687	0.00742392	Human Diseases	Cardiovascular disease	Dilated cardiomyopathy
ko00100	Vermont vs AMF	-0.971762	9.29183	0.000207414	Metabolism	Lipid metabolism	Steroid biosynthesis
ko00120	Vermont vs AMF	-1.21777	8.43276	1.67355e-06	Metabolism	Lipid metabolism	Primary bile acid biosynthesis
ko00121	Vermont vs AMF	0.563158	4.26894	0.0463515	Metabolism	Lipid metabolism	Secondary bile acid biosynthesis
ko00311	Vermont vs AMF	-0.636459	9.68546	0.0213731	Metabolism	Biosynthesis of other secondary metabolites	Penicillin and cephalosporin biosynthesis
ko00331	Vermont vs AMF	6.6202	-2.03738	2.5494e-21	Metabolism	Biosynthesis of other secondary metabolites	Clavulanic acid biosynthesis
ko00364	Vermont vs AMF	0.736633	9.46282	0.00591564	Metabolism	Xenobiotics biodegradation and metabolism	Fluorobenzoate degradation
ko00522	Vermont vs AMF	-3.21529	6.60717	4.3372e-35	Metabolism	Metabolism of terpenoids and polyketides	Biosynthesis of 12-, 14- and 16-membered macrolides
ko00523	Vermont vs AMF	-0.651046	11.6947	0.0181148	Metabolism	Metabolism of terpenoids and polyketides	Polyketide sugar unit biosynthesis
ko00531	Vermont vs AMF	-0.777651	9.90718	0.00339944	Metabolism	Glycan biosynthesis and metabolism	Glycosaminoglycan degradation
ko00540	Vermont vs AMF	0.557079	11.9331	0.0470127	Metabolism	Glycan biosynthesis and metabolism	Lipopolysaccharide biosynthesis
ko00563	Vermont vs AMF	1.0762	-1.57894	0.00853258	Metabolism	Glycan biosynthesis and metabolism	Glycosylphosphatidylinositol (GPI)-anchor biosynthesis
ko00603	Vermont vs AMF	-0.715036	10.2745	0.00795591	Metabolism	Glycan biosynthesis and metabolism	Glycosphingolipid biosynthesis - globo and isoglobo series
ko00624	Vermont vs AMF	-0.553736	10.0534	0.0483931	Metabolism	Xenobiotics biodegradation and metabolism	Polycyclic aromatic hydrocarbon degradation
ko00791	Vermont vs AMF	0.633613	9.57408	0.0216217	Metabolism	Xenobiotics biodegradation and metabolism	Atrazine degradation
ko00906	Vermont vs AMF	-0.796699	10.2164	0.00265457	Metabolism	Metabolism of terpenoids and polyketides	Carotenoid biosynthesis
ko00940	Vermont vs AMF	-0.814568	11.1933	0.00206914	Metabolism	Biosynthesis of other secondary metabolites	Phenylpropanoid biosynthesis
ko00941	Vermont vs AMF	-0.747747	7.67564	0.00513437	Metabolism	Biosynthesis of other secondary metabolites	Flavonoid biosynthesis
ko00943	Vermont vs AMF	1.19451	2.67462	4.55415e-06	Metabolism	Biosynthesis of other secondary metabolites	Isoflavonoid biosynthesis
ko00945	Vermont vs AMF	-0.889433	8.79888	0.000739022	Metabolism	Biosynthesis of other secondary metabolites	Stilbenoid, diarylheptanoid and gingerol biosynthesis
ko00980	Vermont vs AMF	0.619826	11.2917	0.0248242	Metabolism	Xenobiotics biodegradation and metabolism	Metabolism of xenobiotics by cytochrome P450
ko00982	Vermont vs AMF	0.616472	11.3725	0.025589	Metabolism	Xenobiotics biodegradation and metabolism	Drug metabolism - cytochrome P450
ko01051	Vermont vs AMF	-0.67619	10.714	0.0131094	Metabolism	Metabolism of terpenoids and polyketides	Biosynthesis of ansamycins
ko01056	Vermont vs AMF	-1.76479	9.4925	2.01367e-12	Metabolism	Metabolism of terpenoids and polyketides	Biosynthesis of type II polyketide backbone
ko01057	Vermont vs AMF	0.627925	-0.677128	0.0495627	Metabolism	Metabolism of terpenoids and polyketides	Biosynthesis of type II polyketide products
ko02030	Vermont vs AMF	0.830932	12.8064	0.00164588	Cellular Processes	Cell motility	Bacterial chemotaxis
ko02040	Vermont vs AMF	0.89608	13.0821	0.000669908	Cellular Processes	Cell motility	Flagellar assembly
ko03022	Vermont vs AMF	-0.578347	3.51414	0.0409029	Genetic Information Processing	Transcription	Basal transcription factors
ko03040	Vermont vs AMF	-7.51996	-1.10461	1.52255e-30	Genetic Information Processing	Transcription	Spliceosome
ko03050	Vermont vs AMF	-1.26689	9.18312	5.65846e-07	Genetic Information Processing	Folding, sorting and degradation	Proteasome
ko04012	Vermont vs AMF	1.80867	2.94616	1.47356e-12	Environmental Information Processing	Signal transduction	ErbB signaling pathway
ko04020	Vermont vs AMF	1.86269	3.53446	2.1832e-13	Environmental Information Processing	Signal transduction	Calcium signaling pathway
ko04062	Vermont vs AMF	-1.98472	-1.73304	3.70444e-07	Organismal Systems	Immune system	Chemokine signaling pathway
ko04080	Vermont vs AMF	-1.68321	2.22321	5.14312e-11	Environmental Information Processing	Signaling molecules and interaction	Neuroactive ligand-receptor interaction
ko04111	Vermont vs AMF	-1.39564	-1.51414	0.000541607	Cellular Processes	Cell growth and death	Cell cycle - yeast
ko04114	Vermont vs AMF	1.58568	1.73387	1.14041e-09	Cellular Processes	Cell growth and death	Oocyte meiosis
ko04115	Vermont vs AMF	0.878258	8.79619	0.000875539	Cellular Processes	Cell growth and death	p53 signaling pathway
ko04120	Vermont vs AMF	1.70907	2.23723	5.14312e-11	Genetic Information Processing	Folding, sorting and degradation	Ubiquitin mediated proteolysis
ko04144	Vermont vs AMF	0.726031	0.896339	0.0104173	Cellular Processes	Transport and catabolism	Endocytosis
ko04145	Vermont vs AMF	-0.6604	1.81054	0.0214925	Cellular Processes	Transport and catabolism	Phagosome
ko04210	Vermont vs AMF	0.863015	8.96124	0.0010289	Cellular Processes	Cell growth and death	Apoptosis
ko04260	Vermont vs AMF	0.776578	9.12508	0.00340802	Organismal Systems	Circulatory system	Cardiac muscle contraction
ko04270	Vermont vs AMF	-3.5301	-3.47825	0.00300132	Organismal Systems	Circulatory system	Vascular smooth muscle contraction
ko04310	Vermont vs AMF	1.65357	3.606	5.81086e-11	Environmental Information Processing	Signal transduction	Wnt signaling pathway
ko04330	Vermont vs AMF	1.66294	3.15434	5.664e-11	Environmental Information Processing	Signal transduction	Notch signaling pathway
ko04350	Vermont vs AMF	-1.39564	-1.51414	0.000541607	Environmental Information Processing	Signal transduction	TGF-beta signaling pathway
ko04360	Vermont vs AMF	1.70907	2.23723	5.14312e-11	Organismal Systems	Development and regeneration	Axon guidance
ko04370	Vermont vs AMF	-0.687987	0.845258	0.0231444	Environmental Information Processing	Signal transduction	VEGF signaling pathway
ko04380	Vermont vs AMF	-6.40214	-1.97947	1.04935e-17	Organismal Systems	Development and regeneration	Osteoclast differentiation
ko04510	Vermont vs AMF	-0.573859	3.18685	0.0434306	Cellular Processes	Cellular community - eukaryotes	Focal adhesion
ko04512	Vermont vs AMF	-1.16436	3.2983	5.79715e-06	Environmental Information Processing	Signaling molecules and interaction	ECM-receptor interaction
ko04514	Vermont vs AMF	-1.12826	3.27356	1.19746e-05	Environmental Information Processing	Signaling molecules and interaction	Cell adhesion molecules
ko04520	Vermont vs AMF	-1.98472	-1.73304	3.70444e-07	Cellular Processes	Cellular community - eukaryotes	Adherens junction
ko04530	Vermont vs AMF	-1.39564	-1.51414	0.000541607	Cellular Processes	Cellular community - eukaryotes	Tight junction
ko04540	Vermont vs AMF	-3.86266	-3.36527	0.000207414	Cellular Processes	Cellular community - eukaryotes	Gap junction
ko04612	Vermont vs AMF	0.582766	8.53611	0.0366954	Organismal Systems	Immune system	Antigen processing and presentation
ko04614	Vermont vs AMF	1.46564	5.8473	5.63223e-09	Organismal Systems	Endocrine system	Renin-angiotensin system
ko04621	Vermont vs AMF	0.582766	8.53611	0.0366954	Organismal Systems	Immune system	NOD-like receptor signaling pathway
ko04660	Vermont vs AMF	1.70907	2.23723	5.14312e-11	Organismal Systems	Immune system	T cell receptor signaling pathway
ko04712	Vermont vs AMF	6.54447	-2.12532	9.05927e-21	Organismal Systems	Environmental adaptation	Circadian rhythm - plant
ko04720	Vermont vs AMF	1.92126	1.60864	2.40888e-13	Organismal Systems	Nervous system	Long-term potentiation
ko04722	Vermont vs AMF	1.9572	1.60112	1.04043e-13	Organismal Systems	Nervous system	Neurotrophin signaling pathway
ko04730	Vermont vs AMF	-1.39564	-1.51414	0.000541607	Organismal Systems	Nervous system	Long-term depression
ko04740	Vermont vs AMF	1.9572	1.60112	1.04043e-13	Organismal Systems	Sensory system	Olfactory transduction
ko04745	Vermont vs AMF	1.9572	1.60112	1.04043e-13	Organismal Systems	Sensory system	Phototransduction - fly
ko04810	Vermont vs AMF	-0.600338	3.2261	0.0342872	Cellular Processes	Cell motility	Regulation of actin cytoskeleton
ko04912	Vermont vs AMF	1.44672	2.27648	1.86414e-08	Organismal Systems	Endocrine system	GnRH signaling pathway
ko04914	Vermont vs AMF	0.582766	8.53611	0.0366954	Organismal Systems	Endocrine system	Progesterone-mediated oocyte maturation
ko04970	Vermont vs AMF	-3.31774	-0.93242	4.66313e-19	Organismal Systems	Digestive system	Salivary secretion
ko04971	Vermont vs AMF	1.94928	1.62337	1.34112e-13	Organismal Systems	Digestive system	Gastric acid secretion
ko04972	Vermont vs AMF	-1.54126	2.26234	1.58584e-09	Organismal Systems	Digestive system	Pancreatic secretion
ko04973	Vermont vs AMF	-0.845025	7.63877	0.00136506	Organismal Systems	Digestive system	Carbohydrate digestion and absorption
ko04974	Vermont vs AMF	-0.581877	8.20939	0.0366954	Organismal Systems	Digestive system	Protein digestion and absorption
ko04976	Vermont vs AMF	-2.4711	6.75476	3.16925e-22	Organismal Systems	Digestive system	Bile secretion
ko05012	Vermont vs AMF	0.814685	9.96624	0.00206914	Human Diseases	Neurodegenerative disease	Parkinson disease
ko05016	Vermont vs AMF	0.807101	10.659	0.00229132	Human Diseases	Neurodegenerative disease	Huntington disease
ko05020	Vermont vs AMF	0.836001	6.70915	0.0015702	Human Diseases	Neurodegenerative disease	Prion disease
ko05120	Vermont vs AMF	0.767412	8.99219	0.00386118	Human Diseases	Infectious disease: bacterial	Epithelial cell signaling in Helicobacter pylori infection
ko05130	Vermont vs AMF	-2.19616	-1.59457	1.02242e-08	Human Diseases	Infectious disease: bacterial	Pathogenic Escherichia coli infection
ko05131	Vermont vs AMF	-1.63389	0.871026	9.49942e-10	Human Diseases	Infectious disease: bacterial	Shigellosis
ko05140	Vermont vs AMF	-0.687987	0.845258	0.0231444	Human Diseases	Infectious disease: parasitic	Leishmaniasis
ko05142	Vermont vs AMF	1.06454	7.21428	3.69756e-05	Human Diseases	Infectious disease: parasitic	Chagas disease
ko05143	Vermont vs AMF	0.922726	6.95766	0.00047735	Human Diseases	Infectious disease: parasitic	African trypanosomiasis
ko05145	Vermont vs AMF	0.875173	8.78503	0.000904536	Human Diseases	Infectious disease: parasitic	Toxoplasmosis
ko05150	Vermont vs AMF	0.970959	7.19294	0.000207414	Human Diseases	Infectious disease: bacterial	Staphylococcus aureus infection
ko05210	Vermont vs AMF	0.870449	8.78092	0.00094294	Human Diseases	Cancer: specific types	Colorectal cancer
ko05212	Vermont vs AMF	-0.601216	0.554332	0.0495627	Human Diseases	Cancer: specific types	Pancreatic cancer
ko05214	Vermont vs AMF	1.9572	1.60112	1.04043e-13	Human Diseases	Cancer: specific types	Glioma
ko05215	Vermont vs AMF	0.582766	8.53611	0.0366954	Human Diseases	Cancer: specific types	Prostate cancer
ko05219	Vermont vs AMF	-0.777978	7.974	0.00339944	Human Diseases	Cancer: specific types	Bladder cancer
ko05220	Vermont vs AMF	1.66294	3.15434	5.664e-11	Human Diseases	Cancer: specific types	Chronic myeloid leukemia
ko05222	Vermont vs AMF	0.864114	8.78654	0.0010289	Human Diseases	Cancer: specific types	Small cell lung cancer
ko05410	Vermont vs AMF	1.08395	5.56859	2.6841e-05	Human Diseases	Cardiovascular disease	Hypertrophic cardiomyopathy
ko05412	Vermont vs AMF	-5.7979	2.15523	7.08262e-76	Human Diseases	Cardiovascular disease	Arrhythmogenic right ventricular cardiomyopathy
ko05414	Vermont vs AMF	-3.38872	2.4388	4.3372e-35	Human Diseases	Cardiovascular disease	Dilated cardiomyopathy
ko05416	Vermont vs AMF	0.870449	8.78092	0.00094294	Human Diseases	Cardiovascular disease	Viral myocarditis
ko00062	Vermont vs AMF_EBPR	1.13341	2.8202	4.84046e-09	Metabolism	Lipid metabolism	Fatty acid elongation
ko00100	Vermont vs AMF_EBPR	-0.773292	9.35052	4.75299e-05	Metabolism	Lipid metabolism	Steroid biosynthesis
ko00120	Vermont vs AMF_EBPR	-1.23687	8.4155	3.17419e-11	Metabolism	Lipid metabolism	Primary bile acid biosynthesis
ko00121	Vermont vs AMF_EBPR	1.04143	4.5595	3.76625e-08	Metabolism	Lipid metabolism	Secondary bile acid biosynthesis
ko00196	Vermont vs AMF_EBPR	-1.20278	2.43759	2.66697e-10	Metabolism	Energy metabolism	Photosynthesis - antenna proteins
ko00232	Vermont vs AMF_EBPR	-0.603806	6.17979	0.00183826	Metabolism	Biosynthesis of other secondary metabolites	Caffeine metabolism
ko00253	Vermont vs AMF_EBPR	0.45715	10.6754	0.02238	Metabolism	Metabolism of terpenoids and polyketides	Tetracycline biosynthesis
ko00311	Vermont vs AMF_EBPR	-0.671934	9.66024	0.000463	Metabolism	Biosynthesis of other secondary metabolites	Penicillin and cephalosporin biosynthesis
ko00331	Vermont vs AMF_EBPR	5.76729	-2.63515	1.55309e-13	Metabolism	Biosynthesis of other secondary metabolites	Clavulanic acid biosynthesis
ko00361	Vermont vs AMF_EBPR	0.424455	10.5322	0.0362056	Metabolism	Xenobiotics biodegradation and metabolism	Chlorocyclohexane and chlorobenzene degradation
ko00363	Vermont vs AMF_EBPR	0.64483	9.98872	0.000787622	Metabolism	Xenobiotics biodegradation and metabolism	Bisphenol degradation
ko00364	Vermont vs AMF_EBPR	1.07261	9.67153	1.0393e-08	Metabolism	Xenobiotics biodegradation and metabolism	Fluorobenzoate degradation
ko00513	Vermont vs AMF_EBPR	1.24054	1.93431	8.07169e-10	Metabolism	Glycan biosynthesis and metabolism	Various types of N-glycan biosynthesis
ko00522	Vermont vs AMF_EBPR	-3.21686	6.59608	6.66884e-61	Metabolism	Metabolism of terpenoids and polyketides	Biosynthesis of 12-, 14- and 16-membered macrolides
ko00523	Vermont vs AMF_EBPR	-0.594998	11.7052	0.002028	Metabolism	Metabolism of terpenoids and polyketides	Polyketide sugar unit biosynthesis
ko00531	Vermont vs AMF_EBPR	-0.731714	9.9127	0.000132861	Metabolism	Glycan biosynthesis and metabolism	Glycosaminoglycan degradation
ko00540	Vermont vs AMF_EBPR	0.654277	11.9814	0.000677753	Metabolism	Glycan biosynthesis and metabolism	Lipopolysaccharide biosynthesis
ko00562	Vermont vs AMF_EBPR	-0.404561	12.0704	0.0466214	Metabolism	Carbohydrate metabolism	Inositol phosphate metabolism
ko00590	Vermont vs AMF_EBPR	0.515294	10.3278	0.00861463	Metabolism	Lipid metabolism	Arachidonic acid metabolism
ko00591	Vermont vs AMF_EBPR	0.544669	9.22254	0.0051914	Metabolism	Lipid metabolism	Linoleic acid metabolism
ko00603	Vermont vs AMF_EBPR	-0.569858	10.3196	0.00323696	Metabolism	Glycan biosynthesis and metabolism	Glycosphingolipid biosynthesis - globo and isoglobo series
ko00604	Vermont vs AMF_EBPR	-0.428479	9.34348	0.0346581	Metabolism	Glycan biosynthesis and metabolism	Glycosphingolipid biosynthesis - ganglio series
ko00621	Vermont vs AMF_EBPR	-0.485287	10.2995	0.0142873	Metabolism	Xenobiotics biodegradation and metabolism	Dioxin degradation
ko00622	Vermont vs AMF_EBPR	-0.425228	10.0311	0.0361099	Metabolism	Xenobiotics biodegradation and metabolism	Xylene degradation
ko00791	Vermont vs AMF_EBPR	0.591836	9.53827	0.00214791	Metabolism	Xenobiotics biodegradation and metabolism	Atrazine degradation
ko00900	Vermont vs AMF_EBPR	-0.43973	13.2554	0.0294324	Metabolism	Metabolism of terpenoids and polyketides	Terpenoid backbone biosynthesis
ko00901	Vermont vs AMF_EBPR	0.548241	4.34087	0.00543471	Metabolism	Biosynthesis of other secondary metabolites	Indole alkaloid biosynthesis
ko00905	Vermont vs AMF_EBPR	4.23785	-1.06636	2.18546e-35	Metabolism	Metabolism of terpenoids and polyketides	Brassinosteroid biosynthesis
ko00906	Vermont vs AMF_EBPR	-0.78559	10.209	3.55098e-05	Metabolism	Metabolism of terpenoids and polyketides	Carotenoid biosynthesis
ko00909	Vermont vs AMF_EBPR	-0.947436	7.03629	4.58105e-07	Metabolism	Metabolism of terpenoids and polyketides	Sesquiterpenoid and triterpenoid biosynthesis
ko00940	Vermont vs AMF_EBPR	-0.64375	11.2461	0.000795373	Metabolism	Biosynthesis of other secondary metabolites	Phenylpropanoid biosynthesis
ko00941	Vermont vs AMF_EBPR	-0.626644	7.71055	0.00113296	Metabolism	Biosynthesis of other secondary metabolites	Flavonoid biosynthesis
ko00944	Vermont vs AMF_EBPR	0.968344	5.10049	2.83973e-07	Metabolism	Biosynthesis of other secondary metabolites	Flavone and flavonol biosynthesis
ko00945	Vermont vs AMF_EBPR	-0.935	8.77177	6.24954e-07	Metabolism	Biosynthesis of other secondary metabolites	Stilbenoid, diarylheptanoid and gingerol biosynthesis
ko00950	Vermont vs AMF_EBPR	0.536689	9.92828	0.00591027	Metabolism	Biosynthesis of other secondary metabolites	Isoquinoline alkaloid biosynthesis
ko00980	Vermont vs AMF_EBPR	0.687391	11.3225	0.000355122	Metabolism	Xenobiotics biodegradation and metabolism	Metabolism of xenobiotics by cytochrome P450
ko00982	Vermont vs AMF_EBPR	0.690129	11.4071	0.000337948	Metabolism	Xenobiotics biodegradation and metabolism	Drug metabolism - cytochrome P450
ko01051	Vermont vs AMF_EBPR	-0.699901	10.6935	0.000272928	Metabolism	Metabolism of terpenoids and polyketides	Biosynthesis of ansamycins
ko01056	Vermont vs AMF_EBPR	-2.3892	9.3606	7.08435e-37	Metabolism	Metabolism of terpenoids and polyketides	Biosynthesis of type II polyketide backbone
ko01057	Vermont vs AMF_EBPR	2.08147	0.241732	1.40041e-20	Metabolism	Metabolism of terpenoids and polyketides	Biosynthesis of type II polyketide products
ko02030	Vermont vs AMF_EBPR	0.875866	12.8248	3.28225e-06	Cellular Processes	Cell motility	Bacterial chemotaxis
ko02040	Vermont vs AMF_EBPR	0.885644	13.0648	2.51903e-06	Cellular Processes	Cell motility	Flagellar assembly
ko03015	Vermont vs AMF_EBPR	1.14395	2.92332	3.98162e-09	Genetic Information Processing	Translation	mRNA surveillance pathway
ko03040	Vermont vs AMF_EBPR	-4.45827	-1.02135	2.15714e-30	Genetic Information Processing	Transcription	Spliceosome
ko03050	Vermont vs AMF_EBPR	-1.22258	9.1848	5.23724e-11	Genetic Information Processing	Folding, sorting and degradation	Proteasome
ko04020	Vermont vs AMF_EBPR	0.870422	2.81422	8.50448e-06	Environmental Information Processing	Signal transduction	Calcium signaling pathway
ko04062	Vermont vs AMF_EBPR	-6.39925	-1.91303	8.29077e-22	Organismal Systems	Immune system	Chemokine signaling pathway
ko04080	Vermont vs AMF_EBPR	-3.48585	1.97479	1.31309e-55	Environmental Information Processing	Signaling molecules and interaction	Neuroactive ligand-receptor interaction
ko04110	Vermont vs AMF_EBPR	1.12153	1.78261	4.05047e-08	Cellular Processes	Cell growth and death	Cell cycle
ko04111	Vermont vs AMF_EBPR	-6.57806	-1.76329	8.29077e-22	Cellular Processes	Cell growth and death	Cell cycle - yeast
ko04115	Vermont vs AMF_EBPR	0.973177	8.848	2.02834e-07	Cellular Processes	Cell growth and death	p53 signaling pathway
ko04120	Vermont vs AMF_EBPR	-0.623425	0.9002	0.00249913	Genetic Information Processing	Folding, sorting and degradation	Ubiquitin mediated proteolysis
ko04144	Vermont vs AMF_EBPR	1.14694	1.15368	3.05003e-08	Cellular Processes	Transport and catabolism	Endocytosis
ko04150	Vermont vs AMF_EBPR	1.1311	1.77946	3.25252e-08	Environmental Information Processing	Signal transduction	mTOR signaling pathway
ko04210	Vermont vs AMF_EBPR	0.987126	9.03204	1.44888e-07	Cellular Processes	Cell growth and death	Apoptosis
ko04260	Vermont vs AMF_EBPR	0.815823	9.13958	1.62267e-05	Organismal Systems	Circulatory system	Cardiac muscle contraction
ko04270	Vermont vs AMF_EBPR	-3.49945	-3.43548	0.00183523	Organismal Systems	Circulatory system	Vascular smooth muscle contraction
ko04310	Vermont vs AMF_EBPR	2.15711	3.99044	4.29099e-30	Environmental Information Processing	Signal transduction	Wnt signaling pathway
ko04330	Vermont vs AMF_EBPR	2.49668	3.81291	9.07076e-39	Environmental Information Processing	Signal transduction	Notch signaling pathway
ko04350	Vermont vs AMF_EBPR	-6.57806	-1.76329	8.29077e-22	Environmental Information Processing	Signal transduction	TGF-beta signaling pathway
ko04360	Vermont vs AMF_EBPR	-0.634182	0.896282	0.00196923	Organismal Systems	Development and regeneration	Axon guidance
ko04370	Vermont vs AMF_EBPR	0.693207	1.48924	0.000783049	Environmental Information Processing	Signal transduction	VEGF signaling pathway
ko04380	Vermont vs AMF_EBPR	-0.908372	-1.57242	0.00100935	Organismal Systems	Development and regeneration	Osteoclast differentiation
ko04510	Vermont vs AMF_EBPR	-1.82974	2.80685	3.89106e-21	Cellular Processes	Cellular community - eukaryotes	Focal adhesion
ko04512	Vermont vs AMF_EBPR	-1.39406	3.22957	4.16617e-13	Environmental Information Processing	Signaling molecules and interaction	ECM-receptor interaction
ko04514	Vermont vs AMF_EBPR	-1.40203	3.19196	3.48144e-13	Environmental Information Processing	Signaling molecules and interaction	Cell adhesion molecules
ko04520	Vermont vs AMF_EBPR	-6.39925	-1.91303	8.29077e-22	Cellular Processes	Cellular community - eukaryotes	Adherens junction
ko04530	Vermont vs AMF_EBPR	-6.57806	-1.76329	8.29077e-22	Cellular Processes	Cellular community - eukaryotes	Tight junction
ko04612	Vermont vs AMF_EBPR	0.420919	8.4308	0.0371267	Organismal Systems	Immune system	Antigen processing and presentation
ko04614	Vermont vs AMF_EBPR	1.9113	6.17719	1.3643e-24	Organismal Systems	Endocrine system	Renin-angiotensin system
ko04621	Vermont vs AMF_EBPR	0.420864	8.43076	0.0371267	Organismal Systems	Immune system	NOD-like receptor signaling pathway
ko04622	Vermont vs AMF_EBPR	0.787922	5.16532	3.77016e-05	Organismal Systems	Immune system	RIG-I-like receptor signaling pathway
ko04660	Vermont vs AMF_EBPR	-0.634182	0.896282	0.00196923	Organismal Systems	Immune system	T cell receptor signaling pathway
ko04666	Vermont vs AMF_EBPR	0.806803	1.27489	0.000143878	Organismal Systems	Immune system	Fc gamma R-mediated phagocytosis
ko04720	Vermont vs AMF_EBPR	0.732108	0.781835	0.000787622	Organismal Systems	Nervous system	Long-term potentiation
ko04722	Vermont vs AMF_EBPR	0.768253	0.767858	0.000406987	Organismal Systems	Nervous system	Neurotrophin signaling pathway
ko04730	Vermont vs AMF_EBPR	-6.57806	-1.76329	8.29077e-22	Organismal Systems	Nervous system	Long-term depression
ko04740	Vermont vs AMF_EBPR	0.768253	0.767858	0.000406987	Organismal Systems	Sensory system	Olfactory transduction
ko04745	Vermont vs AMF_EBPR	0.768253	0.767858	0.000406987	Organismal Systems	Sensory system	Phototransduction - fly
ko04810	Vermont vs AMF_EBPR	-1.83224	2.8554	2.96685e-21	Cellular Processes	Cell motility	Regulation of actin cytoskeleton
ko04912	Vermont vs AMF_EBPR	0.958409	1.93441	1.49584e-06	Organismal Systems	Endocrine system	GnRH signaling pathway
ko04914	Vermont vs AMF_EBPR	0.420864	8.43076	0.0371267	Organismal Systems	Endocrine system	Progesterone-mediated oocyte maturation
ko04920	Vermont vs AMF_EBPR	-0.549401	11.1339	0.00477388	Organismal Systems	Endocrine system	Adipocytokine signaling pathway
ko04960	Vermont vs AMF_EBPR	-2.50171	-3.65988	0.0375214	Organismal Systems	Excretory system	Aldosterone-regulated sodium reabsorption
ko04962	Vermont vs AMF_EBPR	-3.7489	-3.35035	0.000183288	Organismal Systems	Excretory system	Vasopressin-regulated water reabsorption
ko04970	Vermont vs AMF_EBPR	-0.552985	-0.427985	0.0186041	Organismal Systems	Digestive system	Salivary secretion
ko04971	Vermont vs AMF_EBPR	0.740597	0.778775	0.000699061	Organismal Systems	Digestive system	Gastric acid secretion
ko04972	Vermont vs AMF_EBPR	-3.40005	1.98647	4.69374e-54	Organismal Systems	Digestive system	Pancreatic secretion
ko04973	Vermont vs AMF_EBPR	-1.40507	7.451	4.13502e-14	Organismal Systems	Digestive system	Carbohydrate digestion and absorption
ko04976	Vermont vs AMF_EBPR	-2.75745	6.7033	3.43053e-47	Organismal Systems	Digestive system	Bile secretion
ko05012	Vermont vs AMF_EBPR	0.887971	10.003	2.41126e-06	Human Diseases	Neurodegenerative disease	Parkinson disease
ko05016	Vermont vs AMF_EBPR	0.840397	10.6699	8.65456e-06	Human Diseases	Neurodegenerative disease	Huntington disease
ko05020	Vermont vs AMF_EBPR	0.992256	6.80016	1.33244e-07	Human Diseases	Neurodegenerative disease	Prion disease
ko05100	Vermont vs AMF_EBPR	-0.548507	2.68945	0.00705269	Human Diseases	Infectious disease: bacterial	Bacterial invasion of epithelial cells
ko05110	Vermont vs AMF_EBPR	1.06586	6.46314	1.39879e-08	Human Diseases	Infectious disease: bacterial	Vibrio cholerae infection
ko05120	Vermont vs AMF_EBPR	0.574134	8.863	0.00301567	Human Diseases	Infectious disease: bacterial	Epithelial cell signaling in Helicobacter pylori infection
ko05130	Vermont vs AMF_EBPR	-1.97507	-1.54385	3.32295e-08	Human Diseases	Infectious disease: bacterial	Pathogenic Escherichia coli infection
ko05131	Vermont vs AMF_EBPR	-0.471565	1.22169	0.0294604	Human Diseases	Infectious disease: bacterial	Shigellosis
ko05140	Vermont vs AMF_EBPR	0.693207	1.48924	0.000783049	Human Diseases	Infectious disease: parasitic	Leishmaniasis
ko05142	Vermont vs AMF_EBPR	1.37915	7.42493	1.17385e-13	Human Diseases	Infectious disease: parasitic	Chagas disease
ko05143	Vermont vs AMF_EBPR	1.60553	7.42936	4.53808e-18	Human Diseases	Infectious disease: parasitic	African trypanosomiasis
ko05144	Vermont vs AMF_EBPR	-0.500816	2.08828	0.020594	Human Diseases	Infectious disease: parasitic	Malaria
ko05145	Vermont vs AMF_EBPR	0.982723	8.84517	1.63303e-07	Human Diseases	Infectious disease: parasitic	Toxoplasmosis
ko05150	Vermont vs AMF_EBPR	0.687302	7.00033	0.0003623	Human Diseases	Infectious disease: bacterial	Staphylococcus aureus infection
ko05160	Vermont vs AMF_EBPR	0.889386	1.86196	1.36632e-05	Human Diseases	Infectious disease: viral	Hepatitis C
ko05200	Vermont vs AMF_EBPR	0.488676	10.3644	0.0137235	Human Diseases	Cancer: overview	Pathways in cancer
ko05210	Vermont vs AMF_EBPR	0.980212	8.84244	1.69326e-07	Human Diseases	Cancer: specific types	Colorectal cancer
ko05212	Vermont vs AMF_EBPR	-4.61104	-0.0284771	1.98873e-47	Human Diseases	Cancer: specific types	Pancreatic cancer
ko05214	Vermont vs AMF_EBPR	0.768253	0.767858	0.000406987	Human Diseases	Cancer: specific types	Glioma
ko05215	Vermont vs AMF_EBPR	0.420864	8.43076	0.0371267	Human Diseases	Cancer: specific types	Prostate cancer
ko05219	Vermont vs AMF_EBPR	-0.48827	8.0763	0.013795	Human Diseases	Cancer: specific types	Bladder cancer
ko05220	Vermont vs AMF_EBPR	2.49668	3.81291	9.07076e-39	Human Diseases	Cancer: specific types	Chronic myeloid leukemia
ko05222	Vermont vs AMF_EBPR	0.978584	8.85108	1.7455e-07	Human Diseases	Cancer: specific types	Small cell lung cancer
ko05340	Vermont vs AMF_EBPR	-0.68072	10.1455	0.000404051	Human Diseases	Immune disease	Primary immunodeficiency
ko05410	Vermont vs AMF_EBPR	0.831105	5.39242	1.26251e-05	Human Diseases	Cardiovascular disease	Hypertrophic cardiomyopathy
ko05412	Vermont vs AMF_EBPR	-2.38453	2.38366	7.9602e-32	Human Diseases	Cardiovascular disease	Arrhythmogenic right ventricular cardiomyopathy
ko05414	Vermont vs AMF_EBPR	-2.33879	2.56463	1.84107e-31	Human Diseases	Cardiovascular disease	Dilated cardiomyopathy
ko05416	Vermont vs AMF_EBPR	0.980212	8.84244	1.69326e-07	Human Diseases	Cardiovascular disease	Viral myocarditis
ko00196	Vermont vs AMF_Vermont	-0.957977	2.50382	0.00327528	Metabolism	Energy metabolism	Photosynthesis - antenna proteins
ko00513	Vermont vs AMF_Vermont	-1.99674	0.590467	1.4123e-09	Metabolism	Glycan biosynthesis and metabolism	Various types of N-glycan biosynthesis
ko00514	Vermont vs AMF_Vermont	3.76066	-3.43331	0.00486816	Metabolism	Glycan biosynthesis and metabolism	Other types of O-glycan biosynthesis
ko00522	Vermont vs AMF_Vermont	-1.51525	6.86487	3.1356e-07	Metabolism	Metabolism of terpenoids and polyketides	Biosynthesis of 12-, 14- and 16-membered macrolides
ko00533	Vermont vs AMF_Vermont	3.76066	-3.43331	0.00486816	Metabolism	Glycan biosynthesis and metabolism	Glycosaminoglycan biosynthesis - keratan sulfate
ko00601	Vermont vs AMF_Vermont	3.76066	-3.43331	0.00486816	Metabolism	Glycan biosynthesis and metabolism	Glycosphingolipid biosynthesis - lacto and neolacto series
ko00905	Vermont vs AMF_Vermont	3.49669	-1.63962	3.78277e-14	Metabolism	Metabolism of terpenoids and polyketides	Brassinosteroid biosynthesis
ko01056	Vermont vs AMF_Vermont	-0.875781	9.72072	0.00595918	Metabolism	Metabolism of terpenoids and polyketides	Biosynthesis of type II polyketide backbone
ko01057	Vermont vs AMF_Vermont	1.83447	0.0467759	1.92496e-08	Metabolism	Metabolism of terpenoids and polyketides	Biosynthesis of type II polyketide products
ko03015	Vermont vs AMF_Vermont	-1.92913	1.61121	4.96326e-10	Genetic Information Processing	Translation	mRNA surveillance pathway
ko03022	Vermont vs AMF_Vermont	-2.96424	2.93706	4.45355e-22	Genetic Information Processing	Transcription	Basal transcription factors
ko03040	Vermont vs AMF_Vermont	-0.806206	-0.601611	0.0380752	Genetic Information Processing	Transcription	Spliceosome
ko04012	Vermont vs AMF_Vermont	1.25184	2.51074	5.61053e-05	Environmental Information Processing	Signal transduction	ErbB signaling pathway
ko04020	Vermont vs AMF_Vermont	1.46455	3.2066	1.03252e-06	Environmental Information Processing	Signal transduction	Calcium signaling pathway
ko04110	Vermont vs AMF_Vermont	-2.32221	0.470975	4.81352e-12	Cellular Processes	Cell growth and death	Cell cycle
ko04111	Vermont vs AMF_Vermont	-1.47493	-1.52225	0.00121533	Cellular Processes	Cell growth and death	Cell cycle - yeast
ko04114	Vermont vs AMF_Vermont	-1.12938	0.337221	0.00121533	Cellular Processes	Cell growth and death	Oocyte meiosis
ko04120	Vermont vs AMF_Vermont	1.77892	2.26366	4.1003e-09	Genetic Information Processing	Folding, sorting and degradation	Ubiquitin mediated proteolysis
ko04145	Vermont vs AMF_Vermont	-2.47007	1.35045	1.15971e-14	Cellular Processes	Transport and catabolism	Phagosome
ko04150	Vermont vs AMF_Vermont	-2.31254	0.463418	4.81352e-12	Environmental Information Processing	Signal transduction	mTOR signaling pathway
ko04310	Vermont vs AMF_Vermont	1.01115	3.12716	0.00157198	Environmental Information Processing	Signal transduction	Wnt signaling pathway
ko04330	Vermont vs AMF_Vermont	1.37546	2.92185	5.73269e-06	Environmental Information Processing	Signal transduction	Notch signaling pathway
ko04350	Vermont vs AMF_Vermont	-1.47493	-1.52225	0.00121533	Environmental Information Processing	Signal transduction	TGF-beta signaling pathway
ko04360	Vermont vs AMF_Vermont	1.77892	2.26366	4.1003e-09	Organismal Systems	Development and regeneration	Axon guidance
ko04370	Vermont vs AMF_Vermont	-1.08108	0.698606	0.00157198	Environmental Information Processing	Signal transduction	VEGF signaling pathway
ko04380	Vermont vs AMF_Vermont	-1.79571	-1.72829	0.000145278	Organismal Systems	Development and regeneration	Osteoclast differentiation
ko04530	Vermont vs AMF_Vermont	-1.47493	-1.52225	0.00121533	Cellular Processes	Cellular community - eukaryotes	Tight junction
ko04614	Vermont vs AMF_Vermont	1.49694	5.84711	4.40958e-07	Organismal Systems	Endocrine system	Renin-angiotensin system
ko04660	Vermont vs AMF_Vermont	1.77892	2.26366	4.1003e-09	Organismal Systems	Immune system	T cell receptor signaling pathway
ko04720	Vermont vs AMF_Vermont	-1.04727	0.00462101	0.0034454	Organismal Systems	Nervous system	Long-term potentiation
ko04722	Vermont vs AMF_Vermont	-1.03545	-0.0252378	0.00394218	Organismal Systems	Nervous system	Neurotrophin signaling pathway
ko04730	Vermont vs AMF_Vermont	-1.47493	-1.52225	0.00121533	Organismal Systems	Nervous system	Long-term depression
ko04740	Vermont vs AMF_Vermont	-1.03545	-0.0252378	0.00394218	Organismal Systems	Sensory system	Olfactory transduction
ko04745	Vermont vs AMF_Vermont	-1.03545	-0.0252378	0.00394218	Organismal Systems	Sensory system	Phototransduction - fly
ko04970	Vermont vs AMF_Vermont	-2.72003	-0.874944	4.81352e-12	Organismal Systems	Digestive system	Salivary secretion
ko04971	Vermont vs AMF_Vermont	-1.06435	-0.00677807	0.00327528	Organismal Systems	Digestive system	Gastric acid secretion
ko04976	Vermont vs AMF_Vermont	-1.5346	6.91592	2.22409e-07	Organismal Systems	Digestive system	Bile secretion
ko05020	Vermont vs AMF_Vermont	0.846683	6.69119	0.0084314	Human Diseases	Neurodegenerative disease	Prion disease
ko05140	Vermont vs AMF_Vermont	-1.08108	0.698606	0.00157198	Human Diseases	Infectious disease: parasitic	Leishmaniasis
ko05142	Vermont vs AMF_Vermont	0.89678	7.08023	0.00486816	Human Diseases	Infectious disease: parasitic	Chagas disease
ko05143	Vermont vs AMF_Vermont	1.11031	7.06001	0.000358426	Human Diseases	Infectious disease: parasitic	African trypanosomiasis
ko05144	Vermont vs AMF_Vermont	0.860646	2.77786	0.0084314	Human Diseases	Infectious disease: parasitic	Malaria
ko05150	Vermont vs AMF_Vermont	0.700084	6.99382	0.0448896	Human Diseases	Infectious disease: bacterial	Staphylococcus aureus infection
ko05160	Vermont vs AMF_Vermont	-2.14685	0.713787	5.27015e-11	Human Diseases	Infectious disease: viral	Hepatitis C
ko05212	Vermont vs AMF_Vermont	-3.84503	-0.0115264	4.13912e-23	Human Diseases	Cancer: specific types	Pancreatic cancer
ko05214	Vermont vs AMF_Vermont	-1.03545	-0.0252378	0.00394218	Human Diseases	Cancer: specific types	Glioma
ko05220	Vermont vs AMF_Vermont	1.37546	2.92185	5.73269e-06	Human Diseases	Cancer: specific types	Chronic myeloid leukemia
ko05412	Vermont vs AMF_Vermont	-1.79115	2.47313	4.17718e-09	Human Diseases	Cardiovascular disease	Arrhythmogenic right ventricular cardiomyopathy
ko05414	Vermont vs AMF_Vermont	-1.87264	2.63078	8.85556e-10	Human Diseases	Cardiovascular disease	Dilated cardiomyopathy
ko00062	AMF vs AMF_EBPR	1.1868	2.82455	6.9209e-06	Metabolism	Lipid metabolism	Fatty acid elongation
ko00196	AMF vs AMF_EBPR	-1.29864	2.50418	6.88238e-07	Metabolism	Energy metabolism	Photosynthesis - antenna proteins
ko00232	AMF vs AMF_EBPR	-0.789723	6.30556	0.00356479	Metabolism	Biosynthesis of other secondary metabolites	Caffeine metabolism
ko00331	AMF vs AMF_EBPR	-0.851328	-1.34329	0.0235185	Metabolism	Biosynthesis of other secondary metabolites	Clavulanic acid biosynthesis
ko00513	AMF vs AMF_EBPR	1.62536	1.8671	1.51512e-09	Metabolism	Glycan biosynthesis and metabolism	Various types of N-glycan biosynthesis
ko00563	AMF vs AMF_EBPR	-0.872665	-1.40881	0.0160051	Metabolism	Glycan biosynthesis and metabolism	Glycosylphosphatidylinositol (GPI)-anchor biosynthesis
ko00902	AMF vs AMF_EBPR	0.667517	2.08423	0.0313515	Metabolism	Metabolism of terpenoids and polyketides	Monoterpenoid biosynthesis
ko00905	AMF vs AMF_EBPR	3.31956	-0.826474	1.20991e-18	Metabolism	Metabolism of terpenoids and polyketides	Brassinosteroid biosynthesis
ko00909	AMF vs AMF_EBPR	-0.996511	7.07961	0.000127393	Metabolism	Metabolism of terpenoids and polyketides	Sesquiterpenoid and triterpenoid biosynthesis
ko00943	AMF vs AMF_EBPR	-0.890455	2.79975	0.0010341	Metabolism	Biosynthesis of other secondary metabolites	Isoflavonoid biosynthesis
ko00944	AMF vs AMF_EBPR	0.943078	5.12066	0.000330999	Metabolism	Biosynthesis of other secondary metabolites	Flavone and flavonol biosynthesis
ko01056	AMF vs AMF_EBPR	-0.63069	8.0791	0.0301342	Metabolism	Metabolism of terpenoids and polyketides	Biosynthesis of type II polyketide backbone
ko01057	AMF vs AMF_EBPR	1.45462	0.488516	1.75689e-06	Metabolism	Metabolism of terpenoids and polyketides	Biosynthesis of type II polyketide products
ko03015	AMF vs AMF_EBPR	1.6105	2.81948	7.70708e-10	Genetic Information Processing	Translation	mRNA surveillance pathway
ko03022	AMF vs AMF_EBPR	0.646339	3.57762	0.0283277	Genetic Information Processing	Transcription	Basal transcription factors
ko04012	AMF vs AMF_EBPR	-1.79706	2.97823	4.89585e-12	Environmental Information Processing	Signal transduction	ErbB signaling pathway
ko04020	AMF vs AMF_EBPR	-1.00485	3.78691	0.000128636	Environmental Information Processing	Signal transduction	Calcium signaling pathway
ko04062	AMF vs AMF_EBPR	-4.16154	-2.94302	2.17485e-05	Organismal Systems	Immune system	Chemokine signaling pathway
ko04080	AMF vs AMF_EBPR	-1.80724	0.577981	5.85321e-10	Environmental Information Processing	Signaling molecules and interaction	Neuroactive ligand-receptor interaction
ko04110	AMF vs AMF_EBPR	1.59122	1.68939	4.40457e-09	Cellular Processes	Cell growth and death	Cell cycle
ko04111	AMF vs AMF_EBPR	-4.87789	-2.63739	1.74983e-08	Cellular Processes	Cell growth and death	Cell cycle - yeast
ko04114	AMF vs AMF_EBPR	-1.2485	1.86723	3.35268e-06	Cellular Processes	Cell growth and death	Oocyte meiosis
ko04120	AMF vs AMF_EBPR	-2.36931	2.14169	3.82536e-19	Genetic Information Processing	Folding, sorting and degradation	Ubiquitin mediated proteolysis
ko04145	AMF vs AMF_EBPR	0.914312	1.99054	0.00102737	Cellular Processes	Transport and catabolism	Phagosome
ko04150	AMF vs AMF_EBPR	1.59122	1.68939	4.40457e-09	Environmental Information Processing	Signal transduction	mTOR signaling pathway
ko04330	AMF vs AMF_EBPR	0.812228	4.24696	0.00287393	Environmental Information Processing	Signal transduction	Notch signaling pathway
ko04350	AMF vs AMF_EBPR	-4.87789	-2.63739	1.74983e-08	Environmental Information Processing	Signal transduction	TGF-beta signaling pathway
ko04360	AMF vs AMF_EBPR	-2.38051	2.13986	3.52886e-19	Organismal Systems	Development and regeneration	Axon guidance
ko04370	AMF vs AMF_EBPR	1.37573	1.30876	8.99676e-07	Environmental Information Processing	Signal transduction	VEGF signaling pathway
ko04380	AMF vs AMF_EBPR	5.11831	-2.55062	7.66926e-09	Organismal Systems	Development and regeneration	Osteoclast differentiation
ko04510	AMF vs AMF_EBPR	-1.27903	2.39989	1.3892e-06	Cellular Processes	Cellular community - eukaryotes	Focal adhesion
ko04520	AMF vs AMF_EBPR	-4.16154	-2.94302	2.17485e-05	Cellular Processes	Cellular community - eukaryotes	Adherens junction
ko04530	AMF vs AMF_EBPR	-4.87789	-2.63739	1.74983e-08	Cellular Processes	Cellular community - eukaryotes	Tight junction
ko04540	AMF vs AMF_EBPR	4.38257	-2.88334	2.95709e-06	Cellular Processes	Cellular community - eukaryotes	Gap junction
ko04660	AMF vs AMF_EBPR	-2.38051	2.13986	3.52886e-19	Organismal Systems	Immune system	T cell receptor signaling pathway
ko04712	AMF vs AMF_EBPR	-4.05935	-1.80072	1.77148e-12	Organismal Systems	Environmental adaptation	Circadian rhythm - plant
ko04720	AMF vs AMF_EBPR	-1.20143	1.83505	7.25302e-06	Organismal Systems	Nervous system	Long-term potentiation
ko04722	AMF vs AMF_EBPR	-1.20143	1.83505	7.25302e-06	Organismal Systems	Nervous system	Neurotrophin signaling pathway
ko04730	AMF vs AMF_EBPR	-4.87789	-2.63739	1.74983e-08	Organismal Systems	Nervous system	Long-term depression
ko04740	AMF vs AMF_EBPR	-1.20143	1.83505	7.25302e-06	Organismal Systems	Sensory system	Olfactory transduction
ko04745	AMF vs AMF_EBPR	-1.20143	1.83505	7.25302e-06	Organismal Systems	Sensory system	Phototransduction - fly
ko04810	AMF vs AMF_EBPR	-1.25525	2.43006	2.05897e-06	Cellular Processes	Cell motility	Regulation of actin cytoskeleton
ko04960	AMF vs AMF_EBPR	-3.96724	-3.01835	0.00020605	Organismal Systems	Excretory system	Aldosterone-regulated sodium reabsorption
ko04962	AMF vs AMF_EBPR	-4.07691	-2.98728	0.00020605	Organismal Systems	Excretory system	Vasopressin-regulated water reabsorption
ko04970	AMF vs AMF_EBPR	2.73818	-1.36223	2.40131e-11	Organismal Systems	Digestive system	Salivary secretion
ko04971	AMF vs AMF_EBPR	-1.222	1.84917	5.6114e-06	Organismal Systems	Digestive system	Gastric acid secretion
ko04972	AMF vs AMF_EBPR	-1.86215	0.706374	1.42425e-10	Organismal Systems	Digestive system	Pancreatic secretion
ko05110	AMF vs AMF_EBPR	0.929249	6.52007	0.000392765	Human Diseases	Infectious disease: bacterial	Vibrio cholerae infection
ko05131	AMF vs AMF_EBPR	1.12076	0.54058	8.91006e-05	Human Diseases	Infectious disease: bacterial	Shigellosis
ko05140	AMF vs AMF_EBPR	1.37573	1.30876	8.99676e-07	Human Diseases	Infectious disease: parasitic	Leishmaniasis
ko05143	AMF vs AMF_EBPR	0.662209	7.73658	0.0209889	Human Diseases	Infectious disease: parasitic	African trypanosomiasis
ko05144	AMF vs AMF_EBPR	-0.766724	2.26841	0.00906239	Human Diseases	Infectious disease: parasitic	Malaria
ko05160	AMF vs AMF_EBPR	1.45225	1.72517	8.00214e-08	Human Diseases	Infectious disease: viral	Hepatitis C
ko05212	AMF vs AMF_EBPR	-4.03573	-0.554045	1.22872e-24	Human Diseases	Cancer: specific types	Pancreatic cancer
ko05214	AMF vs AMF_EBPR	-1.20143	1.83505	7.25302e-06	Human Diseases	Cancer: specific types	Glioma
ko05220	AMF vs AMF_EBPR	0.812228	4.24696	0.00287393	Human Diseases	Cancer: specific types	Chronic myeloid leukemia
ko05412	AMF vs AMF_EBPR	3.39981	-0.072745	5.00604e-28	Human Diseases	Cardiovascular disease	Arrhythmogenic right ventricular cardiomyopathy
ko05414	AMF vs AMF_EBPR	1.03368	0.584847	0.00041942	Human Diseases	Cardiovascular disease	Dilated cardiomyopathy
ko00196	AMF vs AMF_Vermont	-1.05178	2.57814	0.00774003	Metabolism	Energy metabolism	Photosynthesis - antenna proteins
ko00331	AMF vs AMF_Vermont	-6.17785	-1.73787	4.86581e-14	Metabolism	Biosynthesis of other secondary metabolites	Clavulanic acid biosynthesis
ko00513	AMF vs AMF_Vermont	-1.61547	0.315828	4.12357e-05	Metabolism	Glycan biosynthesis and metabolism	Various types of N-glycan biosynthesis
ko00514	AMF vs AMF_Vermont	3.43106	-3.1047	0.0125471	Metabolism	Glycan biosynthesis and metabolism	Other types of O-glycan biosynthesis
ko00522	AMF vs AMF_Vermont	1.6704	5.31447	1.6543e-06	Metabolism	Metabolism of terpenoids and polyketides	Biosynthesis of 12-, 14- and 16-membered macrolides
ko00533	AMF vs AMF_Vermont	3.43106	-3.1047	0.0125471	Metabolism	Glycan biosynthesis and metabolism	Glycosaminoglycan biosynthesis - keratan sulfate
ko00601	AMF vs AMF_Vermont	3.43106	-3.1047	0.0125471	Metabolism	Glycan biosynthesis and metabolism	Glycosphingolipid biosynthesis - lacto and neolacto series
ko00905	AMF vs AMF_Vermont	2.56641	-1.37639	7.09413e-08	Metabolism	Metabolism of terpenoids and polyketides	Brassinosteroid biosynthesis
ko00943	AMF vs AMF_Vermont	-0.923429	2.7853	0.0250071	Metabolism	Biosynthesis of other secondary metabolites	Isoflavonoid biosynthesis
ko01056	AMF vs AMF_Vermont	0.858968	8.85256	0.0357488	Metabolism	Metabolism of terpenoids and polyketides	Biosynthesis of type II polyketide backbone
ko01057	AMF vs AMF_Vermont	1.1347	0.295684	0.0101772	Metabolism	Metabolism of terpenoids and polyketides	Biosynthesis of type II polyketide products
ko03015	AMF vs AMF_Vermont	-1.46875	1.27447	7.49776e-05	Genetic Information Processing	Translation	mRNA surveillance pathway
ko03022	AMF vs AMF_Vermont	-2.41193	2.4696	7.58136e-12	Genetic Information Processing	Transcription	Basal transcription factors
ko03040	AMF vs AMF_Vermont	6.22047	-1.77347	3.93866e-15	Genetic Information Processing	Transcription	Spliceosome
ko04062	AMF vs AMF_Vermont	2.80682	-1.14545	3.54936e-09	Organismal Systems	Immune system	Chemokine signaling pathway
ko04080	AMF vs AMF_Vermont	2.33136	2.721	2.07391e-11	Environmental Information Processing	Signaling molecules and interaction	Neuroactive ligand-receptor interaction
ko04110	AMF vs AMF_Vermont	-1.85596	0.122177	1.99166e-06	Cellular Processes	Cell growth and death	Cell cycle
ko04114	AMF vs AMF_Vermont	-2.75434	1.56537	4.56999e-14	Cellular Processes	Cell growth and death	Oocyte meiosis
ko04145	AMF vs AMF_Vermont	-1.83606	0.855514	9.02925e-07	Cellular Processes	Transport and catabolism	Phagosome
ko04150	AMF vs AMF_Vermont	-1.85596	0.122177	1.99166e-06	Environmental Information Processing	Signal transduction	mTOR signaling pathway
ko04380	AMF vs AMF_Vermont	4.13828	-2.88879	0.000173912	Organismal Systems	Development and regeneration	Osteoclast differentiation
ko04512	AMF vs AMF_Vermont	0.902523	3.12398	0.0258426	Environmental Information Processing	Signaling molecules and interaction	ECM-receptor interaction
ko04514	AMF vs AMF_Vermont	0.889462	3.11558	0.0287087	Environmental Information Processing	Signaling molecules and interaction	Cell adhesion molecules
ko04520	AMF vs AMF_Vermont	2.80682	-1.14545	3.54936e-09	Cellular Processes	Cellular community - eukaryotes	Adherens junction
ko04540	AMF vs AMF_Vermont	3.19112	-3.15747	0.0357488	Cellular Processes	Cellular community - eukaryotes	Gap junction
ko04712	AMF vs AMF_Vermont	-6.14928	-1.7729	4.86581e-14	Organismal Systems	Environmental adaptation	Circadian rhythm - plant
ko04720	AMF vs AMF_Vermont	-3.00778	1.4905	4.67857e-16	Organismal Systems	Nervous system	Long-term potentiation
ko04722	AMF vs AMF_Vermont	-3.03171	1.48801	3.45055e-16	Organismal Systems	Nervous system	Neurotrophin signaling pathway
ko04740	AMF vs AMF_Vermont	-3.03171	1.48801	3.45055e-16	Organismal Systems	Sensory system	Olfactory transduction
ko04745	AMF vs AMF_Vermont	-3.03171	1.48801	3.45055e-16	Organismal Systems	Sensory system	Phototransduction - fly
ko04912	AMF vs AMF_Vermont	-1.59633	2.27125	7.90837e-06	Organismal Systems	Endocrine system	GnRH signaling pathway
ko04960	AMF vs AMF_Vermont	-3.84655	-2.93808	0.000831299	Organismal Systems	Excretory system	Aldosterone-regulated sodium reabsorption
ko04971	AMF vs AMF_Vermont	-3.05203	1.50564	3.45055e-16	Organismal Systems	Digestive system	Gastric acid secretion
ko04972	AMF vs AMF_Vermont	2.1836	2.74649	3.40961e-10	Organismal Systems	Digestive system	Pancreatic secretion
ko04976	AMF vs AMF_Vermont	0.903706	5.57602	0.02546	Organismal Systems	Digestive system	Bile secretion
ko05130	AMF vs AMF_Vermont	2.90517	-1.07367	7.38378e-10	Human Diseases	Infectious disease: bacterial	Pathogenic Escherichia coli infection
ko05131	AMF vs AMF_Vermont	1.3079	0.638495	0.000608933	Human Diseases	Infectious disease: bacterial	Shigellosis
ko05160	AMF vs AMF_Vermont	-1.59248	0.306608	4.94125e-05	Human Diseases	Infectious disease: viral	Hepatitis C
ko05212	AMF vs AMF_Vermont	-3.26297	-0.488399	1.1416e-13	Human Diseases	Cancer: specific types	Pancreatic cancer
ko05214	AMF vs AMF_Vermont	-3.03171	1.48801	3.45055e-16	Human Diseases	Cancer: specific types	Glioma
ko05412	AMF vs AMF_Vermont	4.07894	0.424453	4.38792e-25	Human Diseases	Cardiovascular disease	Arrhythmogenic right ventricular cardiomyopathy
ko05414	AMF vs AMF_Vermont	1.4907	0.884624	7.25923e-05	Human Diseases	Cardiovascular disease	Dilated cardiomyopathy
ko00062	AMF_EBPR vs AMF_Vermont	-1.63875	2.6955	2.89852e-08	Metabolism	Lipid metabolism	Fatty acid elongation
ko00121	AMF_EBPR vs AMF_Vermont	-0.848141	4.63162	0.00727923	Metabolism	Lipid metabolism	Secondary bile acid biosynthesis
ko00232	AMF_EBPR vs AMF_Vermont	1.196	6.56524	4.73432e-05	Metabolism	Biosynthesis of other secondary metabolites	Caffeine metabolism
ko00331	AMF_EBPR vs AMF_Vermont	-5.24347	-2.27637	9.97435e-10	Metabolism	Biosynthesis of other secondary metabolites	Clavulanic acid biosynthesis
ko00513	AMF_EBPR vs AMF_Vermont	-3.25036	1.61688	5.72714e-24	Metabolism	Glycan biosynthesis and metabolism	Various types of N-glycan biosynthesis
ko00514	AMF_EBPR vs AMF_Vermont	3.38817	-3.05739	0.00727923	Metabolism	Glycan biosynthesis and metabolism	Other types of O-glycan biosynthesis
ko00522	AMF_EBPR vs AMF_Vermont	1.68223	5.30583	7.33667e-09	Metabolism	Metabolism of terpenoids and polyketides	Biosynthesis of 12-, 14- and 16-membered macrolides
ko00533	AMF_EBPR vs AMF_Vermont	3.38817	-3.05739	0.00727923	Metabolism	Glycan biosynthesis and metabolism	Glycosaminoglycan biosynthesis - keratan sulfate
ko00601	AMF_EBPR vs AMF_Vermont	3.38817	-3.05739	0.00727923	Metabolism	Glycan biosynthesis and metabolism	Glycosphingolipid biosynthesis - lacto and neolacto series
ko00909	AMF_EBPR vs AMF_Vermont	1.25972	7.24976	1.65307e-05	Metabolism	Metabolism of terpenoids and polyketides	Sesquiterpenoid and triterpenoid biosynthesis
ko00944	AMF_EBPR vs AMF_Vermont	-0.955418	5.10719	0.00175366	Metabolism	Biosynthesis of other secondary metabolites	Flavone and flavonol biosynthesis
ko01056	AMF_EBPR vs AMF_Vermont	1.4941	8.65152	2.27065e-07	Metabolism	Metabolism of terpenoids and polyketides	Biosynthesis of type II polyketide backbone
ko03015	AMF_EBPR vs AMF_Vermont	-3.0898	2.57257	5.72714e-24	Genetic Information Processing	Translation	mRNA surveillance pathway
ko03022	AMF_EBPR vs AMF_Vermont	-3.06785	3.02779	4.46325e-24	Genetic Information Processing	Transcription	Basal transcription factors
ko03040	AMF_EBPR vs AMF_Vermont	3.59395	-1.67937	2.21115e-12	Genetic Information Processing	Transcription	Spliceosome
ko03050	AMF_EBPR vs AMF_Vermont	0.787687	8.89387	0.0138818	Genetic Information Processing	Folding, sorting and degradation	Proteasome
ko04012	AMF_EBPR vs AMF_Vermont	1.2017	2.53057	6.4498e-05	Environmental Information Processing	Signal transduction	ErbB signaling pathway
ko04062	AMF_EBPR vs AMF_Vermont	6.80274	-1.3107	7.71233e-23	Organismal Systems	Immune system	Chemokine signaling pathway
ko04080	AMF_EBPR vs AMF_Vermont	4.14004	2.53691	4.53562e-37	Environmental Information Processing	Signaling molecules and interaction	Neuroactive ligand-receptor interaction
ko04110	AMF_EBPR vs AMF_Vermont	-3.45505	1.41519	8.55639e-26	Cellular Processes	Cell growth and death	Cell cycle
ko04111	AMF_EBPR vs AMF_Vermont	4.59586	-2.64993	1.2301e-06	Cellular Processes	Cell growth and death	Cell cycle - yeast
[truncated: 42 more rows]

## Sheet: Supplementary Table 5
Supplementary Table 5. Supplementary Table 5. Significant pairwise associations among bacterial taxa identified through SPIEC-EASI network inference. Edge weights were derived from the optimal β matrix, symmetrized via the symBeta function, and selected using neighborhood estimation (getOptBeta) in the Meinshausen–Bühlmann (MB) framework. The “Treatment” column specifies the soil treatment group …
[truncated: 494 more rows]

[truncated: 1 more sheets: Supplementary Table 6]
